# Supplementary material
Source: publisher figshare collection journal article supplement (https://gsajournals.figshare.com/articles/dataset/_/7798637)
Supplement: Supplementary file 1 [file 1]

## Sheet: Sheet1
	Length	Blast2Go annotation	#GO	GO IDs	GO Names	Enzyme Codes	Enzyme Names	InterPro IDs	InterPro GO IDs	InterPro GO Names	Drosophila top hit		Testis1 counts	ovary1 counts	ovary2 counts	Male counts	Female counts	Mcarcass counts	Fcarcass counts	Pupa6day_1_counts	Pupa6day_2_counts	Pupa6day_3_counts	Pupa3day_1_counts	Pupa3day_2_counts	Pupa3day_3_counts	Larva_counts		Testis_FPKM	ovary1_FPKM	ovary2_FPKM	Male_FPKM	Female_FPKM	Mcarcass_FPKM	Fcarcass_FPKM	Pupa6day_R1_FPKM	Pupa6day_R2_FPKM	Pupa6day_R3_FPKM	pupa3day1_FPKM	pupa3day2_FPKM	pupa3day3_FPKM	Larva_FPKM
SBULL_1.mrna1	302	death-associated inhibitor of apoptosis 1									NP_730098.1 Death-associated inhibitor of apoptosis 1, isoform C [Drosophila melanogaster]		141	671	283	111	82	383	215	1500	1377	2345	1032	852	2396	15		16.8545	121.232	7.17579	26.7769	21.6453	61.6462	33.6788	147.103	151.679	211.976	125.289	103.957	162.693	4.43034
SBULL_1004.mrna1	132	tektin-3	5	F:GO:0005200; C:GO:0005737; P:GO:0007020; P:GO:0030317; P:GO:0046692	F:structural constituent of cytoskeleton; C:cytoplasm; P:microtubule nucleation; P:flagellated sperm motility; P:sperm competition						NP_728445.1 uncharacterized protein Dmel_CG32819, isoform B [Drosophila melanogaster]		8	0	5	1	0	0	0	9	1	3	0	0	1	0		16.8991	0	1.4207	4.28114	0	0	0	81.5621	43.386	25.8442	0.426508	4.34871	12.1145	0
SBULL_10047.mrna1	170	pasiflora 1, isoform A	5	C:GO:0005887; P:GO:0019991; P:GO:0035159; P:GO:0060857; P:GO:0061028	C:integral component of plasma membrane; P:septate junction assembly; P:regulation of tube length, open tracheal system; P:establishment of glial blood-brain barrier; P:establishment of endothelial barrier						NP_650655.1 pasiflora 1, isoform A [Drosophila melanogaster]		12	13	876	14	6	3	3	516	468	679	701	694	1211	59		2.67342	4.43477	42.2487	7.12292	2.32491	1.0809	0.70411	112.88	115.85	137.67	187.646	189.415	184.151	36.8894
SBULL_10048.mrna1	435	uncharacterized protein LOC111676019	1	F:GO:0016740	F:transferase activity						NP_651385.3 uncharacterized protein Dmel_CG10562 [Drosophila melanogaster]		20	18	66	107	120	68	30	58	13	96	21	95	49	64		1.54956	2.09402	1.07631	16.5412	20.2661	7.05119	3.01385	3.52538	0.894142	5.57718	1.5619	7.2801	2.11257	12.3413
SBULL_10053.mrna1	416	uncharacterized protein LOC111676019	1	F:GO:0016740	F:transferase activity						NP_651385.3 uncharacterized protein Dmel_CG10562 [Drosophila melanogaster]		21	14	10	80	31	156	29	11	6	12	2	14	6	96		1.71434	1.71623	0.161968	12.8297	5.56131	17.0467	2.96484	0.705116	0.435215	0.95058	0.235312	1.19963	0.356468	19.4778
SBULL_10057.mrna1	430	uncharacterized protein LOC111676018	1	F:GO:0016740	F:transferase activity						NP_733094.1 uncharacterized protein Dmel_CG31288 [Drosophila melanogaster]		9	1	91	41	41	79	12	27	26	56	44	36	96	57		0.628244	0.117918	1.45448	4.90368	6.38642	7.88298	1.22202	1.6638	1.81299	3.19835	3.31775	2.76775	4.11216	11.1368
SBULL_1006.mrna1	75	tektin-3									NP_728445.1 uncharacterized protein Dmel_CG32819, isoform B [Drosophila melanogaster]		0	0	0	0	0	0	0	0	0	0	0	0	0	0		2.1903	0	0	0	0	0	0	123.295	41.6741	37.1017	1.95933	5.99325	21.148	0
SBULL_10063.mrna1	415	uncharacterized protein LOC111676017	1	F:GO:0016740	F:transferase activity						NP_733100.1 uncharacterized protein Dmel_CG31087, isoform A [Drosophila melanogaster]		3	2	8	28	84	10	2	0	2	3	13	2	3	9		0.245599	0.245871	0.144377	4.45372	14.9319	1.09584	0.212378	0	0.14549	0.178747	1.02262	0.160412	0.134061	1.83107
SBULL_10066.mrna1	152	ubiquitin-conjugating enzyme E2-17 kDa	18	P:GO:0000209; P:GO:0000422; C:GO:0000790; F:GO:0002039; F:GO:0005524; C:GO:0005737; P:GO:0006281; P:GO:0016574; F:GO:0019904; F:GO:0031625; P:GO:0032436; P:GO:0032456; C:GO:0033503; P:GO:0043518; P:GO:0051299; F:GO:0061630; F:GO:0061631; P:GO:1902166	P:protein polyubiquitination; P:autophagy of mitochondrion; C:nuclear chromatin; F:p53 binding; F:ATP binding; C:cytoplasm; P:DNA repair; P:histone ubiquitination; F:protein domain specific binding; F:ubiquitin protein ligase binding; P:positive regulation of proteasomal ubiquitin-dependent protein catabolic process; P:endocytic recycling; C:HULC complex; P:negative regulation of DNA damage respo…						NP_524230.2 ubiquitin conjugating enzyme 6, isoform A [Drosophila melanogaster]		1292	989	1649	817	752	1502	1824	678	641	982	699	698	1431	293		207.831	269.733	96.9443	313.782	255.82	278.05	273.62	180.117	192.694	241.789	227.225	231.349	264.257	215.324
SBULL_10069.mrna1	50	---NA---											170	67	227	74	166	147	82	142	116	287	146	153	348	5		14159.6	23213.8	235.999	26854.9	39108	10014.1	23714.1	986.678	912.074	1848.29	1241.35	1326.38	1680.85	59.5097
SBULL_10070.mrna1	421	probable queuine tRNA-ribosyltransferase	4	C:GO:0005737; F:GO:0008479; F:GO:0046872; P:GO:0101030	C:cytoplasm; F:queuine tRNA-ribosyltransferase activity; F:metal ion binding; P:tRNA-guanine transglycosylation	EC:2.4.2.29	tRNA-guanine(34) transglycosylase				NP_608585.1 tRNA-guanine transglycosylase [Drosophila melanogaster]		111	179	1986	66	203	125	87	324	335	428	561	576	689	117		8.21085	19.4613	33.3645	9.89276	27.2443	12.7143	8.35226	20.4747	23.9553	25.0678	43.38	45.4132	30.2659	23.417
SBULL_10077.mrna1	1025	replication factor C subunit 1	6	F:GO:0000166; F:GO:0003677; C:GO:0005634; C:GO:0005663; P:GO:0006260; P:GO:0048813	F:nucleotide binding; F:DNA binding; C:nucleus; C:DNA replication factor C complex; P:DNA replication; P:dendrite morphogenesis						NP_524229.1 germ line transcription factor 1, isoform A [Drosophila melanogaster]		527	318	1731	109	234	179	154	640	526	666	1060	1030	1290	190		15.6987	14.3169	11.3633	6.56142	15.4818	7.13844	5.97087	14.9171	13.8731	14.3873	30.2318	29.9522	20.9004	14.4253
SBULL_1009.mrna1	153	vacuolar protein sorting-associated protein 13-like protein											1	0	306	1	261	0	0	16	7	10	16	0	9	0		0.317208	0	15.5021	0.653131	126.532	0	0	4.20051	2.07953	2.43323	5.13993	0	1.64243	0
SBULL_10090.mrna1	1154	FERM, RhoGEF and pleckstrin domain-containing protein 1 isoform X1	4	F:GO:0005089; C:GO:0005856; F:GO:0008092; P:GO:0035023	F:Rho guanyl-nucleotide exchange factor activity; C:cytoskeleton; F:cytoskeletal protein binding; P:regulation of Rho protein signal transduction						NP_001036676.1 Chondrocyte-derived ezrin-like domain containing protein, isoform E [Drosophila melanogaster]		323	582	3034	329	366	563	799	1321	1422	1834	1632	1324	1937	425		8.47077	22.7485	17.406	17.2475	21.1842	19.7674	27.0726	27.1323	33.0497	34.9127	41.0165	33.9281	27.6551	28.4904
SBULL_10099.mrna1	43	---NA---											1	0	14	1	0	2	2	16	19	36	21	16	32	0		239.025	0	23.2327	0	0	323.88	962.848	202.097	271.568	421.447	324.574	252.143	280.965	0
SBULL_10104.mrna1	40	---NA---											0	0	0	0	2	2	0	19	26	29	15	26	33	0		0	0	0	0	0	0	0	323.146	500.384	457.135	312.17	551.704	401.963	0
SBULL_10105.mrna1	650	pair-rule protein odd-paired	1	F:GO:0003676	F:nucleic acid binding						NP_524228.2 odd paired [Drosophila melanogaster]		7	89	618	63	67	69	50	114	104	130	227	139	198	63		0.344087	5.53199	6.36231	5.52996	6.06063	3.81174	2.8616	4.36927	4.51047	4.61794	10.646	6.64671	5.27511	7.7818
SBULL_10119.mrna1	940	coiled-coil domain-containing protein 39	3	P:GO:0003341; C:GO:0005930; P:GO:0036159	P:cilium movement; C:axoneme; P:inner dynein arm assembly						NP_649495.1 uncharacterized protein Dmel_CG17387 [Drosophila melanogaster]		4363	0	24	189	1	3	2	1786	750	386	12	103	354	1		141.598	0	0.174688	12.4817	0.0725532	0.13197	0.0850696	45.6859	21.7093	9.15143	0.375609	3.2872	6.29457	0.0831887
SBULL_10131.mrna1	721	zinc finger protein 91	1	F:GO:0003676	F:nucleic acid binding						NP_649494.1 uncharacterized protein Dmel_CG14655 [Drosophila melanogaster]		29	6	127	52	17	105	121	23	13	22	24	5	29	19		1.05265	0.394841	1.1532	4.57964	1.64216	5.92155	6.2956	0.785667	0.502503	0.696521	1.00317	0.213093	0.688606	2.09788
SBULL_10139.mrna1	3382	E3 ubiquitin-protein ligase TRIP12	4	F:GO:0004842; F:GO:0008270; P:GO:0016567; P:GO:0048518	F:ubiquitin-protein transferase activity; F:zinc ion binding; P:protein ubiquitination; P:positive regulation of biological process						NP_001189175.2 circadian trip, isoform J [Drosophila melanogaster]		72943	40665	26769	4199	1712	2479	5694	12874	7844	8239	5203	5490	8304	1123		620.542	519.928	51.236	70.9873	30.5544	27.7014	62.9445	86.649	59.741	51.3955	42.8507	46.101	38.8508	24.871
SBULL_10167.mrna1	707	rhoGEF domain-containing protein gxcJ									NP_649501.1 uncharacterized protein Dmel_CG14657, isoform B [Drosophila melanogaster]		17723	319	923	882	159	103	144	2578	1324	1314	380	463	977	39		792.282	21.4484	8.92033	79.2803	15.5928	6.17007	8.34514	89.9925	52.2994	42.5128	16.2316	20.1647	23.7072	4.39819
SBULL_1017.mrna1	189	coiled-coil domain-containing protein 96-like									NP_610857.2 uncharacterized protein Dmel_CG4714 [Drosophila melanogaster]		1869	0	0	64	0	2	1	613	247	136	1	45	184	0		256.723	0	0	13.0009	0	0.612013	0	115.064	51.9565	23.9268	0.225637	10.5828	23.9695	0
SBULL_10171.mrna1	43	---NA---											0	0	3	0	0	0	0	2	0	1	0	0	1	1		0	0	7.74425	0	0	0	0	25.2621	0	11.7069	0	0	8.78016	27.1977
SBULL_10176.mrna1	284	checkpoint protein HUS1	11	P:GO:0000724; C:GO:0005730; C:GO:0005737; P:GO:0030717; P:GO:0030720; C:GO:0030896; P:GO:0035038; P:GO:0044773; P:GO:0044778; P:GO:0051598; P:GO:0070194	P:double-strand break repair via homologous recombination; C:nucleolus; C:cytoplasm; P:oocyte karyosome formation; P:oocyte localization involved in germarium-derived egg chamber formation; C:checkpoint clamp complex; P:female pronucleus assembly; P:mitotic DNA damage checkpoint; P:meiotic DNA integrity checkpoint; P:meiotic recombination checkpoint; P:synaptonemal complex disassembly						NP_477426.1 Hus1-like, isoform A [Drosophila melanogaster]		17	115	173	8	10	17	28	118	66	138	108	105	148	11		2.21245	22.4995	4.74893	2.10708	2.85195	2.96678	4.74524	12.1873	7.71352	13.21	13.649	13.5301	10.6255	3.50082
SBULL_10177.mrna1	580	RNA polymerase II-associated factor 1 homolog	6	F:GO:0005515; P:GO:0006368; P:GO:0016570; C:GO:0016593; C:GO:0035327; P:GO:0045893	F:protein binding; P:transcription elongation from RNA polymerase II promoter; P:histone modification; C:Cdc73/Paf1 complex; C:transcriptionally active chromatin; P:positive regulation of transcription, DNA-templated						NP_649493.1 antimeros, isoform A [Drosophila melanogaster]		218	120	2622	75	158	113	165	745	611	658	908	877	952	210		19.3613	16.9149	48.8946	14.4683	30.3314	13.8786	18.7774	55.8969	52.4551	45.6693	85.4573	81.6973	47.7893	49.9413
SBULL_1018.mrna1	301	fork head domain-containing protein FD4-like	1	F:GO:0003677	F:DNA binding						NP_524496.1 forkhead domain 96Cb [Drosophila melanogaster]		2	7	50	9	1	3	2	70	58	47	128	208	164	6		0.241785	1.27191	1.22309	2.2001	0.265063	0.324111	0.314614	6.70214	6.28389	4.17075	14.9962	24.8466	10.915	1.77925
SBULL_10184.mrna1	371	mannose-1-phosphate guanyltransferase beta	4	F:GO:0004475; F:GO:0005525; P:GO:0009298; P:GO:0035167	F:mannose-1-phosphate guanylyltransferase activity; F:GTP binding; P:GDP-mannose biosynthetic process; P:larval lymph gland hemopoiesis	EC:2.7.7.13	Mannose-1-phosphate guanylyltransferase				NP_730877.1 uncharacterized protein Dmel_CG1129, isoform B [Drosophila melanogaster]		2476	269	1547	224	244	314	173	1082	659	761	830	873	1306	120		230.803	37.646	30.9023	42.0646	49.0833	38.948	20.8838	79.6598	54.9012	51.9275	74.773	80.1888	66.837	27.7801
SBULL_10192.mrna1	370	Bardet-Biedl syndrome 5 protein homolog	2	C:GO:0034464; P:GO:0060271	C:BBSome; P:cilium assembly						NP_649499.1 uncharacterized protein Dmel_CG1126 [Drosophila melanogaster]		113	0	19	11	2	3	4	97	47	38	11	8	37	3		7.69339	0	0.372025	1.70323	0.412065	0.251285	0.487257	7.16505	3.92853	2.60155	0.994249	0.737268	1.89982	0.696685
SBULL_10195.mrna1	492	sn1-specific diacylglycerol lipase alpha isoform X1	3	P:GO:0006629; C:GO:0016021; F:GO:0016787	P:lipid metabolic process; C:integral component of membrane; F:hydrolase activity						NP_001285230.1 inactivation no afterpotential E, isoform G [Drosophila melanogaster]		16	97	726	67	77	64	110	282	213	266	105	89	201	59		1.07455	9.57759	10.4615	8.64885	11.226	5.66052	9.48395	14.8245	12.6705	12.9603	6.75421	5.83726	7.34496	9.89626
SBULL_10197.mrna1	89	cytochrome P450 4p1-like	5	F:GO:0004497; F:GO:0005506; F:GO:0016705; F:GO:0020037; P:GO:0055114	F:monooxygenase activity; F:iron ion binding; F:oxidoreductase activity, acting on paired donors, with incorporation or reduction of molecular oxygen; F:heme binding; P:oxidation-reduction process						NP_610472.1 Cyp4p2 [Drosophila melanogaster]		5	0	13	14	25	30	0	12	12	17	28	29	52	13		5.25839	0	2.65894	32.525	50.3415	43.7877	0	19.3855	18.8025	23.1005	41.794	42.6135	45.5594	24.9151
SBULL_10199.mrna1	65	---NA---									NP_524828.1 cytochrome P450-4p1 [Drosophila melanogaster]		1	0	0	0	0	0	0	6	10	4	6	23	31	0		0	0	0	0	0	0	0	15.7215	29.6503	9.71414	19.2375	75.1899	56.4635	0
SBULL_102.mrna1	273	uncharacterized protein LOC111684275	1	C:GO:0016021	C:integral component of membrane						NP_649622.2 osiris 3, isoform A [Drosophila melanogaster]		0	0	4	0	0	0	0	2860	21449	71	79	13	572	0		0	0	0.0902591	0	0	0	0	311.239	2641.31	7.16122	10.5199	1.76506	43.2699	0
SBULL_10202.mrna1	492	U4/U6.U5 tri-snRNP-associated protein 2	4	P:GO:0000245; F:GO:0008270; P:GO:0016579; F:GO:0036459	P:spliceosomal complex assembly; F:zinc ion binding; P:protein deubiquitination; F:thiol-dependent ubiquitinyl hydrolase activity	EC:3.4.19.12	Ubiquitinyl hydrolase 1				NP_573334.1 ubiquitin specific protease 39 [Drosophila melanogaster]		192	78	1225	67	78	89	105	206	206	247	311	241	492	71		11.4931	7.86981	17.3059	8.52035	10.4955	7.37338	8.96888	10.8378	12.2638	12.044	20.0211	15.8189	17.9928	11.7502
SBULL_10203.mrna1	196	formin-like protein CG32138									NP_728208.1 uncharacterized protein Dmel_CG32544, isoform A [Drosophila melanogaster]		0	4	97	21	21	14	7	67	44	106	28	26	39	21		0	1.29853	3.81796	8.79213	8.92942	3.47894	1.41307	11.6788	8.67881	17.125	5.97222	5.65437	4.72552	10.7631
SBULL_10208.mrna1	967	zinc finger CCCH domain-containing protein 13									NP_996386.1 uncharacterized protein Dmel_CG12075, isoform B [Drosophila melanogaster]		31	631	6270	275	301	206	259	1242	2119	1266	528	370	574	338		0.990141	30.0388	43.5583	17.2975	20.7659	8.74865	10.6045	30.8162	59.4939	29.1133	16.0304	11.4537	9.8999	27.2075
SBULL_10218.mrna1	309	protein phosphatase PTC7 homolog	1	F:GO:0003824	F:catalytic activity						NP_647619.1 uncharacterized protein Dmel_CG12091, isoform A [Drosophila melanogaster]		643	145	3700	336	461	310	452	574	445	471	302	291	431	293		74.6328	25.3158	93.2604	79.2133	118.009	48.604	68.7793	53.133	46.6119	40.4086	34.2069	33.6072	27.7327	84.1835
SBULL_10222.mrna1	454	bleomycin hydrolase	2	F:GO:0004197; P:GO:0006508	F:cysteine-type endopeptidase activity; P:proteolysis	EC:3.4.22	Acting on peptide bonds (peptidases)				NP_001285018.1 uncharacterized protein Dmel_CG1440, isoform D [Drosophila melanogaster]		760	1463	14233	506	681	535	339	1638	1259	2138	920	1108	1791	416		56.0825	167.298	235.276	73.9436	115.211	54.6611	32.9136	116.766	100.86	143.245	79.0639	99.5441	88.1044	82.5379
SBULL_1023.mrna1	266	egalitarian, isoform B	12	F:GO:0003729; C:GO:0005622; P:GO:0007294; P:GO:0007312; P:GO:0007436; F:GO:0008408; P:GO:0016325; P:GO:0045450; P:GO:0045451; P:GO:0046011; P:GO:0051028; P:GO:0090305	F:mRNA binding; C:intracellular; P:germarium-derived oocyte fate determination; P:oocyte nucleus migration involved in oocyte dorsal/ventral axis specification; P:larval salivary gland morphogenesis; F:3'-5' exonuclease activity; P:oocyte microtubule cytoskeleton organization; P:bicoid mRNA localization; P:pole plasm oskar mRNA localization; P:regulation of oskar mRNA translation; P:mRNA transpor…						NP_726360.3 egalitarian, isoform B [Drosophila melanogaster]		83	182	745	141	230	284	284	207	264	312	223	190	353	57		11.6128	36.4153	20.0656	35.8638	40.6279	51.2957	49.8388	23.3233	33.6596	32.5818	30.7453	26.7092	27.6475	19.6653
SBULL_10230.mrna1	249	INO80 complex subunit E	2	P:GO:0006338; C:GO:0031011	P:chromatin remodeling; C:Ino80 complex						NP_610625.1 uncharacterized protein Dmel_CG18004, isoform A [Drosophila melanogaster]		262	221	1052	115	253	235	204	381	335	406	413	444	469	66		27.3438	38.8056	32.4176	24.7541	64.9071	32.5524	28.421	46.9612	46.7244	46.3811	62.2901	68.2787	40.1837	24.7338
SBULL_10233.mrna1	259	uncharacterized protein F58A4.6									NP_572478.1 uncharacterized protein Dmel_CG12123 [Drosophila melanogaster]		127	170	2360	29	67	43	31	136	117	177	196	156	274	14		18.1844	35.5073	67.4362	7.43087	19.5844	8.46095	5.5454	15.8852	15.4641	19.1615	28.0134	22.7335	22.2468	4.9933
SBULL_10234.mrna1	143	bleomycin hydrolase	2	F:GO:0004197; P:GO:0006508	F:cysteine-type endopeptidase activity; P:proteolysis	EC:3.4.22	Acting on peptide bonds (peptidases)				NP_001096907.1 uncharacterized protein Dmel_CG1440, isoform C [Drosophila melanogaster]		8	5	58	1	7	5	3	9	6	12	2	1	7	1		3.56301	3.76888	10.7235	0.736299	3.8535	2.89062	1.41797	29.755	25.926	33.9208	22.5739	25.2439	25.4406	3.23986
SBULL_1024.mrna1	164	egalitarian, isoform B	12	F:GO:0003729; C:GO:0005622; P:GO:0007294; P:GO:0007312; P:GO:0007436; F:GO:0008408; P:GO:0016325; P:GO:0045450; P:GO:0045451; P:GO:0046011; P:GO:0051028; P:GO:0090305	F:mRNA binding; C:intracellular; P:germarium-derived oocyte fate determination; P:oocyte nucleus migration involved in oocyte dorsal/ventral axis specification; P:larval salivary gland morphogenesis; F:3'-5' exonuclease activity; P:oocyte microtubule cytoskeleton organization; P:bicoid mRNA localization; P:pole plasm oskar mRNA localization; P:regulation of oskar mRNA translation; P:mRNA transpor…						NP_726360.3 egalitarian, isoform B [Drosophila melanogaster]		18	29	300	62	27	35	39	120	121	145	81	84	163	27		4.24569	9.82094	16.4555	31.9521	12.9112	11.0689	11.9429	27.8925	31.8256	31.2375	23.0381	24.3598	26.3364	17.7836
SBULL_10251.mrna1	590	probable tyrosyl-DNA phosphodiesterase	11	P:GO:0000012; F:GO:0003690; F:GO:0003697; F:GO:0004527; C:GO:0005634; C:GO:0005737; P:GO:0006302; P:GO:0007417; F:GO:0017005; P:GO:0045197; P:GO:0090305	P:single strand break repair; F:double-stranded DNA binding; F:single-stranded DNA binding; F:exonuclease activity; C:nucleus; C:cytoplasm; P:double-strand break repair; P:central nervous system development; F:3'-tyrosyl-DNA phosphodiesterase activity; P:establishment or maintenance of epithelial cell apical/basal polarity; P:nucleic acid phosphodiester bond hydrolysis						NP_523465.2 glaikit [Drosophila melanogaster]		558	424	1488	107	206	124	164	437	383	471	393	501	664	118		28.6289	29.7382	17.3564	10.8923	21.0843	8.41809	9.98949	18.6742	18.5201	18.6544	20.5498	26.7107	19.7238	16.2005
SBULL_10252.mrna1	362	sulfotransferase 1C4	4	C:GO:0005829; P:GO:0006805; F:GO:0008146; P:GO:0051923	C:cytosol; P:xenobiotic metabolic process; F:sulfotransferase activity; P:sulfation						NP_610918.1 sulfotransferase 4, isoform A [Drosophila melanogaster]		140	314	780	90	88	212	381	1941	1763	2400	1160	1706	3543	147		13.2925	45.1438	16.2937	17.4903	18.3999	27.2197	47.658	147.277	151.372	168.78	107.701	161.501	186.871	35.0181
SBULL_10260.mrna1	641	caspase-3	5	C:GO:0005737; P:GO:0006508; P:GO:0006915; P:GO:0035069; F:GO:0097153	C:cytoplasm; P:proteolysis; P:apoptotic process; P:larval midgut histolysis; F:cysteine-type endopeptidase activity involved in apoptotic process	EC:3.4.22	Acting on peptide bonds (peptidases)				NP_477462.1 death executioner caspase related to Apopain/Yama [Drosophila melanogaster]		96	80	247	180	297	242	62	10	13	67	4	15	9	205		3.94362	5.46824	2.65712	15.6454	26.9261	13.3486	3.68125	0.583934	0.660768	2.5978	0.190541	0.825676	0.270605	25.7086
SBULL_10269.mrna1	264	derlin-2	3	C:GO:0005789; C:GO:0016021; P:GO:0042742	C:endoplasmic reticulum membrane; C:integral component of membrane; P:defense response to bacterium						NP_650553.1 Derlin-2 [Drosophila melanogaster]		341	409	6896	210	387	412	297	381	324	421	326	345	524	138		30.0344	59.144	204.478	49.5535	107.734	41.2529	27.9654	43.3665	41.7311	44.4133	45.4048	48.9933	41.4594	47.7114
SBULL_10276.mrna1	340	uncharacterized protein LOC111691125									NP_573335.1 uncharacterized protein Dmel_CG7326, isoform A [Drosophila melanogaster]		201	34	355	13	52	23	24	118	77	114	86	115	130	34		20.1646	4.84107	7.91772	2.30839	11.8623	2.92417	3.24153	9.67774	7.14608	8.66558	8.63068	11.7673	7.41136	8.7178
SBULL_10290.mrna1	377	actin-5, muscle-specific	5	F:GO:0005200; F:GO:0005524; C:GO:0005737; C:GO:0005884; P:GO:0007010	F:structural constituent of cytoskeleton; F:ATP binding; C:cytoplasm; C:actin filament; P:cytoskeleton organization						NP_524210.1 actin 79B, isoform A [Drosophila melanogaster]		38	19	24	115159	37949	93861	47095	33252	14511	70837	176	82	227	6		3.48604	2.61802	0.464863	20259.8	7396.94	11380.1	5532.73	2405.4	1188.21	4748.59	18.9928	7.74606	12.4956	1.36337
SBULL_10299.mrna1	282	sarcotoxin II-1-like	3	C:GO:0005576; P:GO:0042742; P:GO:0045087	C:extracellular region; P:defense response to bacterium; P:innate immune response						NP_523745.1 Attacin-A [Drosophila melanogaster]		5454	46	4547	3	3	8085	16	185	302	274	8655	43539	51804	0		726.237	10.6613	124.614	0.797421	0.8633	1445.51	2.90749	22.7259	39.164	29.5656	1280.97	6500.14	4311.36	0
SBULL_1030.mrna1	79	sestrin homolog isoform X2	7	P:GO:0000422; C:GO:0005634; P:GO:0010259; P:GO:0030308; P:GO:1901031; P:GO:1904262; P:GO:2000377	P:autophagy of mitochondrion; C:nucleus; P:multicellular organism aging; P:negative regulation of cell growth; P:regulation of response to reactive oxygen species; P:negative regulation of TORC1 signaling; P:regulation of reactive oxygen species metabolic process						NP_001286778.1 sestrin, isoform D [Drosophila melanogaster]		1	1	163	0	14	8	9	23	31	56	26	19	52	7		3.36476	5.25143	51.7697	0	44.0421	19.1437	17.5481	131.021	188.001	242.869	97.5161	171.893	130.511	25.5122
SBULL_10302.mrna1	494	serine/arginine repetitive matrix protein 1-like									NP_001246574.1 spinophilin, isoform F [Drosophila melanogaster]		326	279	1013	107	98	254	110	171	211	315	210	123	315	30		21.7425	28.0192	14.3477	14.4037	14.42	22.7335	9.53385	8.95415	12.5025	15.2876	13.4556	8.03565	11.4657	5.01303
SBULL_10305.mrna1	164	purine nucleoside phosphorylase isoform X1	2	F:GO:0004731; P:GO:0009116	F:purine-nucleoside phosphorylase activity; P:nucleoside metabolic process	EC:2.4.2.1	Purine-nucleoside phosphorylase				NP_647727.2 uncharacterized protein Dmel_CG16758, isoform B [Drosophila melanogaster]		1663	2836	234	507	497	2061	1778	519	267	417	128	191	467	30		454.289	1198.58	13.3123	285.245	303.72	778.259	657.235	144.344	86.7972	99.529	43.232	62.9295	84.018	19.7596
SBULL_10307.mrna1	76	purine nucleoside phosphorylase isoform X1	2	F:GO:0004731; P:GO:0009116	F:purine-nucleoside phosphorylase activity; P:nucleoside metabolic process	EC:2.4.2.1	Purine-nucleoside phosphorylase				NP_995969.1 uncharacterized protein Dmel_CG16758, isoform F [Drosophila melanogaster]		0	0	0	0	0	0	0	0	0	0	1	0	0	0		0	0	0	0	0	0	0	266.662	180.355	129.257	52.5078	57.3615	115.053	0
SBULL_10309.mrna1	71	purine nucleoside phosphorylase isoform X2	2	F:GO:0004731; P:GO:0009116	F:purine-nucleoside phosphorylase activity; P:nucleoside metabolic process	EC:2.4.2.1	Purine-nucleoside phosphorylase				NP_995970.1 uncharacterized protein Dmel_CG16758, isoform E [Drosophila melanogaster]		0	1	0	0	0	0	0	0	0	0	0	0	0	0		378.681	137.086	4.06018	300.522	23.5099	51.7492	58.8456	396.776	259.364	221.361	63.6351	112.944	174.054	3.37734
SBULL_1031.mrna1	168	ionotropic receptor	3	F:GO:0004970; C:GO:0016021; P:GO:0035235	F:ionotropic glutamate receptor activity; C:integral component of membrane; P:ionotropic glutamate receptor signaling pathway						NP_995744.4 ionotropic receptor 41a [Drosophila melanogaster]		1	0	3	1	0	2	0	0	0	0	0	0	0	0		0.272379	0	0.178056	0.558502	0	0.734316	0	0	0.252497	0.41362	0	0	0	0
SBULL_10310.mrna1	53	---NA---											55	17	42	5	3	8	5	429	183	295	68	90	299	6		2395.51	3416.81	49.1551	899.138	301.754	335.051	884.473	2283.64	1097.2	1448.68	440.873	594.949	1101.24	52.2772
SBULL_10313.mrna1	159	putative gamma-glutamylcyclotransferase CG2811 isoform X2	2	F:GO:0016740; F:GO:0061929	F:transferase activity; F:gamma-glutamylaminecyclotransferase activity	EC:4.3.2.8	Gamma-glutamylamine cyclotransferase				NP_611982.2 uncharacterized protein Dmel_CG2811, isoform A [Drosophila melanogaster]		44	28	488	40	86	46	41	382	342	437	258	262	484	68		11.0118	11.2281	28.9372	17.1269	50.382	11.2433	11.394	93.672	94.8981	99.3182	77.4142	80.1559	82.5	46.875
SBULL_10317.mrna1	241	protein CDV3 homolog	3	F:GO:0003674; C:GO:0005575; P:GO:0008150	F:molecular_function; C:cellular_component; P:biological_process						NP_611981.2 uncharacterized protein Dmel_CG3760, isoform B [Drosophila melanogaster]		1741	2014	7638	645	1529	856	656	2278	2146	2630	2672	2246	3442	1904		291.62	509.846	285.897	214.868	564.116	190.006	142.635	358.377	374.595	381.877	507.168	443.423	372.195	812.067
SBULL_10320.mrna1	169	actin-related protein 2/3 complex subunit 4	10	F:GO:0003779; F:GO:0005200; C:GO:0005737; C:GO:0005885; P:GO:0008360; P:GO:0030031; P:GO:0030866; P:GO:0033627; P:GO:0034314; P:GO:0042060	F:actin binding; F:structural constituent of cytoskeleton; C:cytoplasm; C:Arp2/3 protein complex; P:regulation of cell shape; P:cell projection assembly; P:cortical actin cytoskeleton organization; P:cell adhesion mediated by integrin; P:Arp2/3 complex-mediated actin nucleation; P:wound healing						NP_608996.1 Actin-related protein 2/3 complex, subunit 4 [Drosophila melanogaster]		330	488	1444	171	210	419	404	492	426	600	719	674	1021	130		60.1736	135.513	67.1	65.8259	72.7346	89.1058	67.884	108.696	106.498	122.857	194.371	185.778	156.796	81.3442
SBULL_10323.mrna1	483	tubulin gamma-1 chain	6	C:GO:0000930; F:GO:0003924; F:GO:0005525; C:GO:0005874; P:GO:0007020; P:GO:0031122	C:gamma-tubulin complex; F:GTPase activity; F:GTP binding; C:microtubule; P:microtubule nucleation; P:cytoplasmic microtubule organization	EC:3.6.1.15	Nucleoside-triphosphate phosphatase				NP_476804.1 gamma-Tubulin at 23C [Drosophila melanogaster]		2	4	683	0	222	0	0	4	0	0	2	4	0	0		0.0686475	0.412218	9.87453	0	32.9115	0	0	0.215006	0	0	0.131545	0.268249	0	0
SBULL_10326.mrna1	265	testis-specific serine/threonine-protein kinase 3	6	F:GO:0004674; F:GO:0005524; C:GO:0005634; C:GO:0005737; P:GO:0006468; P:GO:0035556	F:protein serine/threonine kinase activity; F:ATP binding; C:nucleus; C:cytoplasm; P:protein phosphorylation; P:intracellular signal transduction	EC:2.7.11	Transferring phosphorus-containing groups				NP_608999.2 uncharacterized protein Dmel_CG9222 [Drosophila melanogaster]		14449	8	11	920	5	7	5	1371	645	590	3	37	297	0		2020.9	1.71206	0.281351	259.795	1.55825	1.33647	0.927537	155.259	82.654	61.9259	0.415714	5.22768	23.3796	0
SBULL_10327.mrna1	553	Trimethyllysine dioxygenase	2	F:GO:0005488; F:GO:0016491	F:binding; F:oxidoreductase activity						NP_572967.2 uncharacterized protein Dmel_CG5321, isoform B [Drosophila melanogaster]		46	20	440	3	50	0	3	76	46	32	65	93	97	3		2.70772	1.76694	5.63939	0.355069	6.47634	0	0.22863	3.49546	2.39405	1.36409	3.65813	5.33657	3.10117	0.442285
SBULL_1033.mrna1	83	ionotropic receptor 41a	4	F:GO:0004970; P:GO:0009593; C:GO:0016021; P:GO:0035235	F:ionotropic glutamate receptor activity; P:detection of chemical stimulus; C:integral component of membrane; P:ionotropic glutamate receptor signaling pathway						NP_995744.4 ionotropic receptor 41a [Drosophila melanogaster]		0	0	2	1	0	0	0	0	1	1	0	0	0	0		0	0	0.249228	0	0	0	0	0	1.30663	1.07021	0	0	0	0
SBULL_10333.mrna1	1084	dynein heavy chain 1, axonemal	4	P:GO:0003341; F:GO:0003777; C:GO:0005858; F:GO:0016887	P:cilium movement; F:microtubule motor activity; C:axonemal dynein complex; F:ATPase activity	EC:3.6.1.3; EC:3.6.1.15	Adenosinetriphosphatase; Nucleoside-triphosphate phosphatase				NP_649475.3 uncharacterized protein Dmel_CG14651 [Drosophila melanogaster]		3369	8	0	139	0	0	1	1011	471	265	0	35	175	0		95.0908	0.33937	0	7.8831	0	0	0.0365288	22.1958	11.7011	5.39222	0	0.958686	2.67067	0
SBULL_1034.mrna1	133	DNA polymerase theta	9	F:GO:0003677; F:GO:0003887; F:GO:0005524; P:GO:0006261; P:GO:0006289; F:GO:0016887; P:GO:0036297; P:GO:0071897; P:GO:0097681	F:DNA binding; F:DNA-directed DNA polymerase activity; F:ATP binding; P:DNA-dependent DNA replication; P:nucleotide-excision repair; F:ATPase activity; P:interstrand cross-link repair; P:DNA biosynthetic process; P:double-strand break repair via alternative nonhomologous end joining	EC:3.6.1.3; EC:2.7.7.7; EC:3.6.1.15	Adenosinetriphosphatase; DNA-directed DNA polymerase; Nucleoside-triphosphate phosphatase				NP_524333.1 mutagen-sensitive 308 [Drosophila melanogaster]		5	0	118	0	0	0	0	5	1	1	4	3	8	0		2.0319	0	10.2486	0	0	0	0	1.71611	0.388382	0.318108	1.67992	1.28465	1.90865	0
SBULL_10341.mrna1	248	Tectonic	1	C:GO:0035869	C:ciliary transition zone						NP_608998.2 tectonic [Drosophila melanogaster]		203	0	18	7	1	0	0	43	23	16	15	23	30	1		31.2182	0	0.613623	2.20535	0.339858	0	0	5.32954	3.22577	1.83799	2.27492	3.55661	2.58467	0.376665
SBULL_10349.mrna1	579	telomerase Cajal body protein 1	3	C:GO:0015030; P:GO:0030576; F:GO:0034512	C:Cajal body; P:Cajal body organization; F:box C/D snoRNA binding						NP_608997.3 WD repeat domain 79, isoform B [Drosophila melanogaster]		193	169	2488	103	286	242	391	346	364	454	648	592	795	225		6.76439	8.22215	28.8453	8.99005	26.2066	8.37323	11.1436	15.1038	17.9803	18.3682	34.6131	32.2418	24.1235	31.5353
SBULL_1035.mrna1	112	DNA polymerase theta isoform X2	5	F:GO:0003677; F:GO:0003887; F:GO:0005524; P:GO:0006261; P:GO:0071897	F:DNA binding; F:DNA-directed DNA polymerase activity; F:ATP binding; P:DNA-dependent DNA replication; P:DNA biosynthetic process	EC:2.7.7.7	DNA-directed DNA polymerase				NP_524333.1 mutagen-sensitive 308 [Drosophila melanogaster]		2	2	38	2	0	0	0	1	2	1	0	5	5	0		0.57655	0	8.52582	1.21643	0	0	0	2.51233	2.8429	0.931403	4.91871	6.89584	4.19131	0
SBULL_10362.mrna1	254	proteoglycan 4											147	43	105	782	440	2196	2545	2060	2445	3460	1369	920	1329	1		21.8174	9.73094	3.17137	234.909	143.262	441.386	497.906	255.96	348.544	404.094	209.879	142.912	116.476	0.365486
SBULL_10371.mrna1	84	putative fatty acyl-CoA reductase CG5065 isoform X2	6	P:GO:0006629; P:GO:0008340; C:GO:0016021; P:GO:0055114; F:GO:0080019; F:GO:0102965	P:lipid metabolic process; P:determination of adult lifespan; C:integral component of membrane; P:oxidation-reduction process; F:fatty-acyl-CoA reductase (alcohol-forming) activity; F:alcohol-forming fatty acyl-CoA reductase activity	EC:1.2.1.84	Alcohol-forming fatty acyl-CoA reductase				NP_611980.1 uncharacterized protein Dmel_CG30427, isoform B [Drosophila melanogaster]		12	23	7	17	58	35	40	448	322	440	11	6	23	1		15.6493	40.3164	1.44625	44.3236	149.975	63.9672	71.3329	498.383	405.346	453.669	14.9738	8.32769	17.7859	2.20208
SBULL_10372.mrna1	376	odorant receptor 94b-like	2	C:GO:0016020; P:GO:0050896	C:membrane; P:response to stimulus						NP_523711.3 odorant receptor 49a [Drosophila melanogaster]		2	0	3	0	2	0	0	2	2	1	2	0	1	0		0.18406	0	0.0202754	0	0.404236	0	0	0.144855	0.163915	0.067128	0.17725	0	0.050346	0
SBULL_10376.mrna1	348	rhoGEF domain-containing protein gxcJ	2	F:GO:0005089; P:GO:0035023	F:Rho guanyl-nucleotide exchange factor activity; P:regulation of Rho protein signal transduction						NP_001163308.1 Rho guanine nucleotide exchange factor 3, isoform K [Drosophila melanogaster]		3481	2896	2193	217	283	120	178	606	624	382	262	253	471	32		344.935	431.683	44.2505	42.8257	59.4372	16.1053	22.9699	48.2807	56.2562	28.2076	25.5421	25.1483	26.0846	7.98335
SBULL_10385.mrna1	417	polycomb group protein Pc	5	C:GO:0005634; P:GO:0007275; P:GO:0009987; P:GO:0010468; P:GO:0048519	C:nucleus; P:multicellular organism development; P:cellular process; P:regulation of gene expression; P:negative regulation of biological process						NP_524199.1 polycomb [Drosophila melanogaster]		37	410	530	32	39	52	79	81	85	64	122	110	98	38		2.76778	45.7185	8.99094	4.9205	6.4402	5.01241	7.91902	5.17734	6.14788	3.79142	9.54192	8.77207	4.35421	7.68883
SBULL_1040.mrna1	169	28S ribosomal protein S15, mitochondrial	4	F:GO:0003735; C:GO:0005763; P:GO:0032543; P:GO:0040008	F:structural constituent of ribosome; C:mitochondrial small ribosomal subunit; P:mitochondrial translation; P:regulation of growth						NP_611691.1 bonsai [Drosophila melanogaster]		300	286	1314	177	382	609	669	343	312	487	418	324	524	346		20.2285	32.628	35.1819	25.4937	72.201	44.9158	24.9536	36.496	37.5656	48.0264	54.4229	43.0114	38.7565	113.205
SBULL_10400.mrna1	407	forkhead box protein C1-like	1	C:GO:0016021	C:integral component of membrane						NP_001036681.1 uncharacterized protein Dmel_CG34113, isoform O [Drosophila melanogaster]		0	0	54	8	6	1	9	19	6	13	4	4	8	10		0	0	0.997022	1.01283	1.10431	0.112132	0.869335	1.25027	0.446771	0.792854	0.32208	0.328395	0.365932	2.08035
SBULL_10405.mrna1	216	protein wech	8	P:GO:0002168; C:GO:0005622; C:GO:0005927; F:GO:0008270; P:GO:0016203; P:GO:0030154; F:GO:0030674; P:GO:0033632	P:instar larval development; C:intracellular; C:muscle tendon junction; F:zinc ion binding; P:muscle attachment; P:cell differentiation; F:protein binding, bridging; P:regulation of cell-cell adhesion mediated by integrin						NP_724568.1 wech, isoform C [Drosophila melanogaster]		0	1735	1695	4	22	0	4	27	37	27	42	61	65	16		0	486.737	67.9199	1.52633	9.0123	0	0.981528	4.07021	6.3116	3.7724	7.74741	11.4728	6.81127	7.20147
SBULL_10406.mrna1	184	protein wech	8	P:GO:0002168; C:GO:0005622; C:GO:0005927; F:GO:0008270; P:GO:0016203; P:GO:0030154; F:GO:0030674; P:GO:0033632	P:instar larval development; C:intracellular; C:muscle tendon junction; F:zinc ion binding; P:muscle attachment; P:cell differentiation; F:protein binding, bridging; P:regulation of cell-cell adhesion mediated by integrin						NP_724568.1 wech, isoform C [Drosophila melanogaster]		2	2918	1475	4	22	0	6	40	22	24	61	47	61	13		0.473396	925.991	68.3445	1.45122	9.79477	0	1.86551	7.69394	4.78847	4.27859	14.3573	11.2791	8.28977	7.26767
SBULL_10414.mrna1	47	protein wech	7	P:GO:0002168; C:GO:0005622; C:GO:0005927; F:GO:0008270; P:GO:0016203; F:GO:0030674; P:GO:0033632	P:instar larval development; C:intracellular; C:muscle tendon junction; F:zinc ion binding; P:muscle attachment; F:protein binding, bridging; P:regulation of cell-cell adhesion mediated by integrin						NP_724568.1 wech, isoform C [Drosophila melanogaster]		0	406	115	0	8	0	1	6	3	6	7	9	14	0		0	0	72.384	0	0	0	0	53.0936	30.0398	49.2088	75.7955	99.3622	86.1154	0
SBULL_10416.mrna1	147	cyclic GMP-binding protein C-like									NP_001259200.1 uncharacterized protein Dmel_CG4116, isoform B [Drosophila melanogaster]		0	0	3	0	0	0	0	13	1	10	0	0	0	1		0	0	0.220874	0	0	0	0	3.67226	0.31965	2.61813	0	0	0	0.776041
SBULL_10419.mrna1	943	irregular chiasm C-roughest protein	15	P:GO:0001745; C:GO:0005886; C:GO:0005912; C:GO:0005917; P:GO:0007156; P:GO:0007157; P:GO:0007523; C:GO:0009986; C:GO:0016021; P:GO:0016202; P:GO:0036059; F:GO:0050839; P:GO:0061321; P:GO:0097206; P:GO:1901739	P:compound eye morphogenesis; C:plasma membrane; C:adherens junction; C:nephrocyte diaphragm; P:homophilic cell adhesion via plasma membrane adhesion molecules; P:heterophilic cell-cell adhesion via plasma membrane cell adhesion molecules; P:larval visceral muscle development; C:cell surface; C:integral component of membrane; P:regulation of striated muscle tissue development; P:nephrocyte diaphr…						NP_726844.1 kin of irre, isoform A [Drosophila melanogaster]		35	18	1240	257	61	125	55	651	453	1165	946	454	1019	79		1.04992	0.787434	8.87159	15.4007	4.04918	4.99778	2.16187	16.5955	13.0675	27.5255	29.509	14.4395	18.057	6.54978
SBULL_1043.mrna1	111	39S ribosomal protein L52, mitochondrial	3	F:GO:0003735; C:GO:0005762; P:GO:0032543	F:structural constituent of ribosome; C:mitochondrial large ribosomal subunit; P:mitochondrial translation						NP_610313.1 mitochondrial ribosomal protein L52 [Drosophila melanogaster]		18	3	601	7	90	8	0	61	35	115	32	39	50	76		10.0008	2.68124	62.1599	6.21281	104.242	5.6163	0	50.8376	30.7971	88.0486	35.1878	39.7218	32.1258	94.3705
SBULL_10438.mrna1	339	cyclin-dependent kinase 7	8	F:GO:0004693; F:GO:0005524; C:GO:0005737; P:GO:0006468; F:GO:0008353; P:GO:0045944; P:GO:0051726; C:GO:0070985	F:cyclin-dependent protein serine/threonine kinase activity; F:ATP binding; C:cytoplasm; P:protein phosphorylation; F:RNA polymerase II carboxy-terminal domain kinase activity; P:positive regulation of transcription by RNA polymerase II; P:regulation of cell cycle; C:TFIIK complex	EC:2.7.11; EC:2.7.11.23; EC:2.7.11.22	Transferring phosphorus-containing groups; [RNA-polymerase]-subunit kinase; Cyclin-dependent kinase				NP_511044.1 Cyclin-dependent kinase 7 [Drosophila melanogaster]		261	175	1301	26	89	47	29	146	123	172	171	161	256	38		24.5144	23.3525	26.5023	4.00174	19.6888	6.28876	3.65999	12.0183	11.4573	13.1226	17.2243	16.5351	14.6485	9.77736
SBULL_1044.mrna1	414	zinc finger Ran-binding domain-containing protein 2	1	F:GO:0046872	F:metal ion binding						NP_611692.1 uncharacterized protein Dmel_CG3732 [Drosophila melanogaster]		110	111	1493	56	264	131	148	225	232	282	284	360	384	60		9.03086	13.5614	25.2288	9.09834	46.9069	14.1766	15.7609	14.5062	16.9256	16.8508	22.405	28.9575	17.2094	12.2408
SBULL_10441.mrna1	2145	phospholipid-transporting ATPase ID isoform X1	5	F:GO:0000287; F:GO:0004012; F:GO:0005524; C:GO:0016021; P:GO:0045332	F:magnesium ion binding; F:phospholipid-translocating ATPase activity; F:ATP binding; C:integral component of membrane; P:phospholipid translocation	EC:3.6.1.3; EC:3.6.3.1; EC:3.6.1.15	Adenosinetriphosphatase; Phospholipid-translocating ATPase; Nucleoside-triphosphate phosphatase				NP_001247067.1 ATPase 8B, isoform C [Drosophila melanogaster]		1216	267	2003	472	329	661	976	372	297	433	171	210	309	124		16.862	5.53496	6.08827	13.0619	9.88978	12.2304	17.4553	3.99496	3.6092	4.30981	2.24709	2.81369	2.30669	4.37696
SBULL_10464.mrna1	557	28S ribosomal protein S30, mitochondrial	3	F:GO:0003735; C:GO:0005763; P:GO:0032543	F:structural constituent of ribosome; C:mitochondrial small ribosomal subunit; P:mitochondrial translation						NP_511167.1 mitochondrial ribosomal protein S30, isoform A [Drosophila melanogaster]		466	221	3907	157	396	313	270	921	612	1296	611	481	806	1141		26.2162	18.8409	48.4898	17.7267	46.1258	23.5831	19.7294	42.013	31.5908	54.7936	34.1051	27.3752	25.5577	166.738
SBULL_10470.mrna1	1240	regulator of nonsense transcripts 1 homolog	7	F:GO:0003677; F:GO:0004386; F:GO:0005524; C:GO:0005737; F:GO:0008270; P:GO:0071456; P:GO:2000624	F:DNA binding; F:helicase activity; F:ATP binding; C:cytoplasm; F:zinc ion binding; P:cellular response to hypoxia; P:positive regulation of nuclear-transcribed mRNA catabolic process, nonsense-mediated decay	EC:3.6.1.15	Nucleoside-triphosphate phosphatase				NP_572767.1 Upf1, isoform A [Drosophila melanogaster]		2763	461	4989	372	437	578	784	1503	1186	1094	1164	1235	1541	679		67.4573	16.9653	26.4884	18.1991	22.6699	18.7821	24.7756	28.6051	25.5419	19.2976	27.1077	29.3251	20.3868	42.223
SBULL_10479.mrna1	51	---NA---											91	20	101	7	30	13	12	35	35	42	49	44	56	2		6737.89	6194.63	168.681	1926.16	6149.65	799.84	2855.58	225.299	254.944	250.577	385.96	353.372	250.577	0
SBULL_10482.mrna1	45	---NA---											49	16	76	17	14	23	12	24	35	30	21	37	43	4		0	0	94.8498	0	5422.91	122.409	0	252.407	416.527	292.424	270.249	485.49	314.356	82.4441
SBULL_10486.mrna1	2351	poly(A) RNA polymerase gld-2 homolog B-like isoform X1	5	F:GO:0004652; C:GO:0005654; C:GO:0005737; P:GO:0007616; C:GO:0043005	F:polynucleotide adenylyltransferase activity; C:nucleoplasm; C:cytoplasm; P:long-term memory; C:neuron projection	EC:2.7.7.19	Polynucleotide adenylyltransferase				NP_651012.2 GLD2 poly(A) polymerase, isoform B [Drosophila melanogaster]		4122	19380	47854	235	1246	108	280	412	177	262	52	67	234	26		52.0579	366.886	132.532	5.94254	34.6643	1.82116	4.56125	4.02528	1.95685	2.38153	0.621666	0.816698	1.58919	0.835522
SBULL_105.mrna1	385	hypothetical protein FF38_12520	1	C:GO:0016021	C:integral component of membrane						NP_001262305.1 osiris 4, isoform B [Drosophila melanogaster]		1	0	1	0	0	0	0	529	2981	12	37	2	42	0		0.0894666	0	0.0197137	0	0	0	0	37.2262	237.377	0.782663	3.18602	0.175594	2.05449	0
SBULL_10511.mrna1	253	neuronal acetylcholine receptor subunit alpha-7 isoform X1	13	F:GO:0004888; C:GO:0005892; P:GO:0006812; P:GO:0007271; P:GO:0007630; P:GO:0007632; C:GO:0014069; F:GO:0022848; C:GO:0030054; P:GO:0034220; C:GO:0043197; C:GO:0045211; P:GO:0060079	F:transmembrane signaling receptor activity; C:acetylcholine-gated channel complex; P:cation transport; P:synaptic transmission, cholinergic; P:jump response; P:visual behavior; C:postsynaptic density; F:acetylcholine-gated cation-selective channel activity; C:cell junction; P:ion transmembrane transport; C:dendritic spine; C:postsynaptic membrane; P:excitatory postsynaptic potential						NP_001162795.1 nicotinic acetylcholine receptor alpha7, isoform E [Drosophila melanogaster]		0	1	18	8	3	2	13	4	2	7	0	0	6	10		0	0.227489	0.564508	2.14686	0.993136	0.405954	2.56486	0.482369	0.272919	0.782381	0	0	0.502959	3.67303
SBULL_10518.mrna1	1846	hypothetical protein FF38_08466											28544	3	0	1030	1	17	7	4513	1596	1662	1	113	733	0		456.094	0.0728898	0	32.7801	0.0357449	0.346214	0.14635	57.1933	22.7701	19.3477	0.0153508	1.76865	6.41823	0
SBULL_1052.mrna1	485	G-protein coupled receptor Mth2 isoform X1	1	P:GO:0050896	P:response to stimulus						NP_001246533.1 methuselah-like 10, isoform D [Drosophila melanogaster]		246	524	150	68	131	825	509	678	541	782	692	661	1425	10		14.0746	43.796	2.11032	9.62464	17.4301	48.4476	22.1312	38.569	36.1378	41.1016	49.0274	47.4526	58.6032	1.70573
SBULL_10530.mrna1	201	nascent polypeptide-associated complex subunit alpha	5	F:GO:0005515; C:GO:0005854; P:GO:0007275; P:GO:0015031; P:GO:0048477	F:protein binding; C:nascent polypeptide-associated complex; P:multicellular organism development; P:protein transport; P:oogenesis						NP_725229.1 nascent polypeptide associated complex protein alpha subunit, isoform C [Drosophila melanogaster]		2618	4560	17791	2809	6512	5031	4406	6555	6039	8638	7941	6608	8924	5574		422.206	1116.78	730.045	910.963	2494.87	1133.3	999.83	1099.64	1146.37	1343.04	1630.07	1383.04	1040.63	2755.14
SBULL_10536.mrna1	417	diacylglycerol kinase epsilon	7	F:GO:0003951; F:GO:0004143; F:GO:0005524; C:GO:0005622; P:GO:0007205; P:GO:0016310; P:GO:0035556	F:NAD+ kinase activity; F:diacylglycerol kinase activity; F:ATP binding; C:intracellular; P:protein kinase C-activating G-protein coupled receptor signaling pathway; P:phosphorylation; P:intracellular signal transduction	EC:2.7.1.23; EC:2.7.1.107	NAD(+) kinase; Diacylglycerol kinase (ATP)				NP_725228.1 diacyl glycerol kinase epsilon, isoform A [Drosophila melanogaster]		37	97	689	58	62	37	42	126	159	152	166	143	206	65		2.60497	10.7573	11.5393	7.21673	9.48141	3.59586	4.0123	8.11755	11.9341	9.30084	13.2179	11.8024	9.28603	13.1519
SBULL_10542.mrna1	135	Octopamine receptor beta-2R	9	F:GO:0003700; F:GO:0004989; C:GO:0005622; C:GO:0005887; P:GO:0006355; P:GO:0007189; P:GO:0009566; P:GO:0030728; P:GO:0045887	F:DNA-binding transcription factor activity; F:octopamine receptor activity; C:intracellular; C:integral component of plasma membrane; P:regulation of transcription, DNA-templated; P:adenylate cyclase-activating G-protein coupled receptor signaling pathway; P:fertilization; P:ovulation; P:positive regulation of synaptic growth at neuromuscular junction						NP_001303505.1 octopamine beta2 receptor, isoform G [Drosophila melanogaster]		3	8	38	51	20	43	91	0	0	3	1	0	2	8		1.18581	2.39134	2.81455	26.2339	7.67788	13.3808	21.0419	0	0	0.925954	0.407495	0	0.462977	7.09971
SBULL_10543.mrna1	134	Octopamine receptor beta-2R	3	F:GO:0004930; P:GO:0007186; C:GO:0016021	F:G-protein coupled receptor activity; P:G-protein coupled receptor signaling pathway; C:integral component of membrane						NP_001303505.1 octopamine beta2 receptor, isoform G [Drosophila melanogaster]		2	1	43	43	19	57	131	1	1	2	2	1	5	12		0	0	2.2471	7.4844	5.18792	2.71381	6.40299	0.338044	0.382524	0.62662	0.82729	0.421756	1.17491	10.7783
SBULL_10544.mrna1	107	---NA---											0	1	21	13	15	9	30	0	1	2	0	2	6	1		0	0	1.87651	5.43744	5.45281	1.75021	1.73997	0	0.636446	1.04258	0	1.40344	2.34579	1.32929
SBULL_10547.mrna1	63	---NA---											0	0	3	4	8	0	3	0	0	3	0	0	1	0		0	0	1.28194	66.9021	75.2451	0	27.3056	0	0	8.14635	0	0	2.03659	0
SBULL_1055.mrna1	185	protein spaetzle isoform X1	2	C:GO:0016020; C:GO:0016021	C:membrane; C:integral component of membrane						NP_733188.1 spatzle, isoform I [Drosophila melanogaster]		20	58	233	30	43	66	11	29	29	70	49	134	137	30		3.99119	16.9818	11.5902	12.9526	20.4554	18.6459	3.39179	7.05605	6.4739	13.9633	13.0678	34.7376	19.3542	16.6456
SBULL_10555.mrna1	42	---NA---											0	0	0	0	0	0	0	1	0	4	0	0	1	0		0	0	0	0	0	0	0	13.9028	0	51.5423	0	0	9.66417	0
SBULL_10556.mrna1	118	nuclear receptor 2C2-associated protein	3	F:GO:0003735; C:GO:0005840; P:GO:0006412	F:structural constituent of ribosome; C:ribosome; P:translation						NP_001097439.2 uncharacterized protein Dmel_CG34213 [Drosophila melanogaster]		37	0	114	34	96	60	0	38	13	35	18	30	38	19		18.538	0	11.7347	35.6442	102.662	41.3231	0	25.7773	15.0875	26.3628	23.9286	26.0613	29.6581	22.2557
SBULL_10558.mrna1	404	golgin subfamily B member 1-like											1458	558	711	105	74	222	263	265	178	243	122	146	188	46		117.96	66.3664	12.7578	17.0297	12.0678	24.6598	28.3932	17.5936	13.3726	14.9526	9.91115	12.0935	8.6762	9.65112
SBULL_10559.mrna1	193	golgin subfamily B member 1-like	3	C:GO:0005813; F:GO:0008017; P:GO:0034453	C:centrosome; F:microtubule binding; P:microtubule anchoring								506	187	300	27	26	66	59	102	105	85	62	65	59	24		98.1019	56.1242	13.1583	11.6966	10.0923	18.389	12.7246	18.2065	21.208	14.062	13.5417	14.4753	7.32049	12.0386
SBULL_10568.mrna1	356	mediator of RNA polymerase II transcription subunit 13	3	F:GO:0003677; C:GO:0005634; P:GO:0006355	F:DNA binding; C:nucleus; P:regulation of transcription, DNA-templated						NP_611860.1 uncharacterized protein Dmel_CG10904, isoform A [Drosophila melanogaster]		42	26	112	11	34	17	42	68	60	77	75	72	100	14		4.12807	3.8389	2.35942	2.18169	7.33662	2.23795	5.234	5.26713	5.25897	5.52785	7.10855	6.95801	5.38427	3.40085
SBULL_10571.mrna1	283	probable chitinase 3	3	C:GO:0005576; P:GO:0006030; F:GO:0008061	C:extracellular region; P:chitin metabolic process; F:chitin binding						NP_648531.1 uncharacterized protein Dmel_CG11570, isoform A [Drosophila melanogaster]		2	2	48	1	10	84	59	53	22	60	188	11837	10259	7		0.261466	0.393071	1.17819	0.264591	2.86475	14.726	10.0446	5.4994	2.58313	5.77021	23.87	1532.39	739.957	2.23743
SBULL_10573.mrna1	580	anaphase-promoting complex subunit 7	4	C:GO:0005680; P:GO:0016567; P:GO:0045842; F:GO:0061630	C:anaphase-promoting complex; P:protein ubiquitination; P:positive regulation of mitotic metaphase/anaphase transition; F:ubiquitin protein ligase activity						NP_572329.3 anaphase promoting complex subunit 7, isoform A [Drosophila melanogaster]		80	125	2238	56	123	95	128	389	368	465	505	463	644	77		4.46369	10.4672	27.0651	6.28083	14.9815	7.08856	9.24428	16.9477	18.1424	18.7765	26.922	25.1669	19.5033	10.7717
SBULL_1058.mrna1	418	transmembrane protein 39A	1	C:GO:0016021	C:integral component of membrane						NP_610929.2 uncharacterized protein Dmel_CG13016 [Drosophila melanogaster]		88	47	764	29	58	43	33	359	289	373	377	362	544	67		6.81883	5.24162	12.7597	4.57948	9.8117	4.455	3.26394	22.8809	20.8431	22.0338	29.4019	28.7856	24.1013	13.5196
SBULL_10580.mrna1	1643	serine/threonine-protein kinase 10 isoform X1	3	F:GO:0004674; F:GO:0005524; P:GO:0006468	F:protein serine/threonine kinase activity; F:ATP binding; P:protein phosphorylation	EC:2.7.11	Transferring phosphorus-containing groups				NP_995935.1 Sterile20-like kinase, isoform D [Drosophila melanogaster]		2818	1363	11197	430	1080	908	1348	2410	1902	2076	1852	1951	2968	692		51.8729	37.5891	45.7803	15.6041	44.2009	22.2451	31.8537	35.5327	31.5863	28.1288	33.515	35.356	30.3897	32.6434
SBULL_10594.mrna1	188	IS256 family transposase	3	F:GO:0003677; F:GO:0004803; P:GO:0006313	F:DNA binding; F:transposase activity; P:transposition, DNA-mediated								0	0	0	0	0	0	0	0	0	0	0	0	0	0		0	0	0	0	0	0	0	0	0	0	0	0	0	0
SBULL_10596.mrna1	258	putative fatty acyl-CoA reductase CG5065	5	P:GO:0006629; C:GO:0016020; P:GO:0055114; F:GO:0080019; F:GO:0102965	P:lipid metabolic process; C:membrane; P:oxidation-reduction process; F:fatty-acyl-CoA reductase (alcohol-forming) activity; F:alcohol-forming fatty acyl-CoA reductase activity	EC:1.2.1.84	Alcohol-forming fatty acyl-CoA reductase				NP_572276.1 uncharacterized protein Dmel_CG4020, isoform A [Drosophila melanogaster]		127	250	105	83	331	102	0	30	4	87	0	0	0	0		17.5401	53.4225	2.88068	23.3041	103.58	18.3931	0	3.52254	0.531471	9.46793	0	0	0	0
SBULL_10599.mrna1	333	death-associated protein kinase related	2	F:GO:0016301; P:GO:0016310	F:kinase activity; P:phosphorylation						NP_996411.2 Death-associated protein kinase related, isoform E [Drosophila melanogaster]		2261	938	2260	373	318	413	357	506	470	912	273	193	514	51		238.84	148.35	50.3914	79.4545	73.4678	58.4277	49.3348	42.9326	45.2476	71.7023	28.4302	20.7955	30.3701	13.4023
SBULL_10601.mrna1	181	endocuticle structural glycoprotein ABD-4	1	F:GO:0042302	F:structural constituent of cuticle						NP_610777.1 cuticular protein 49Ah [Drosophila melanogaster]		3	5	3	72	41	60	24	9512	5308	19056	215	144	240	0		0.727975	1.09719	0.158938	31.2603	20.0759	17.6438	7.33477	1878.21	1186.01	3487.43	51.9476	35.475	32.9417	0
SBULL_10604.mrna1	1261	protein dispatched	2	P:GO:0007224; C:GO:0016021	P:smoothened signaling pathway; C:integral component of membrane						NP_524734.2 dispatched [Drosophila melanogaster]		34	7740	3875	19	104	17	54	191	150	137	317	309	383	40		0.81971	278.945	20.4629	0.918146	5.5285	0.547467	1.68083	3.57112	3.17357	2.37407	7.25246	7.20805	4.97774	2.44417
SBULL_1061.mrna1	530	probable cysteine--tRNA ligase, mitochondrial	4	F:GO:0004817; F:GO:0005524; C:GO:0005739; P:GO:0006423	F:cysteine-tRNA ligase activity; F:ATP binding; C:mitochondrion; P:cysteinyl-tRNA aminoacylation	EC:6.1.1.16	Cysteine--tRNA ligase				NP_610930.1 Cysteinyl-tRNA synthetase, mitochondrial, isoform A [Drosophila melanogaster]		1	7	53	0	10	5	1	16	4	17	20	16	30	9		2.96216	7.13232	9.72495	3.22699	6.51703	4.62252	2.39748	15.6324	11.629	15.5618	22.1984	26.125	19.3516	22.5442
SBULL_10616.mrna1	366	centrosomal protein of 55 kDa isoform X2									NP_732669.1 uncharacterized protein Dmel_CG6569, isoform B [Drosophila melanogaster]		6381	6	18	335	2	4	4	2915	1320	1033	9	114	670	1		556.836	0.856708	0.355952	57.5275	0.417454	0.381903	0.493715	218.212	111.814	71.6705	0.824397	10.6471	34.8639	0.235185
SBULL_10618.mrna1	353	cyclin-dependent kinase 20	7	F:GO:0005524; P:GO:0006281; P:GO:0006468; F:GO:0008353; C:GO:0030915; P:GO:0035556; C:GO:0070985	F:ATP binding; P:DNA repair; P:protein phosphorylation; F:RNA polymerase II carboxy-terminal domain kinase activity; C:Smc5-Smc6 complex; P:intracellular signal transduction; C:TFIIK complex	EC:2.7.11; EC:2.7.11.23	Transferring phosphorus-containing groups; [RNA-polymerase]-subunit kinase				NP_650984.1 uncharacterized protein Dmel_CG6800 [Drosophila melanogaster]		0	0	0	0	0	0	0	0	0	0	0	0	0	0		0.595801	1.04422	3.41137	0.601194	4.14188	0.93104	0.902891	4.77467	7.08579	7.32716	8.71584	10.9375	8.10703	6.37878
SBULL_10621.mrna1	670	gamma-aminobutyric acid type B receptor subunit 2 isoform X1	4	F:GO:0004965; C:GO:0005886; P:GO:0007186; C:GO:0016021	F:G-protein coupled GABA receptor activity; C:plasma membrane; P:G-protein coupled receptor signaling pathway; C:integral component of membrane						NP_001287456.1 metabotropic GABA-B receptor subtype 2, isoform C [Drosophila melanogaster]		10	20	372	37	35	17	35	157	136	187	124	103	181	92		0.475388	1.3553	3.82241	3.43755	3.55899	1.08043	2.15221	5.8174	5.70234	6.42203	5.62219	4.76162	4.66198	10.9962
SBULL_10628.mrna1	319	zinc finger protein 330 homolog	3	C:GO:0005634; F:GO:0008270; P:GO:0035167	C:nucleus; F:zinc ion binding; P:larval lymph gland hemopoiesis						NP_651622.2 Noa36 [Drosophila melanogaster]		448	144	2871	130	922	231	129	894	767	1128	974	898	1527	580		40.0251	19.9361	65.0909	25.6699	194.344	32.5436	17.5434	79.4566	77.1388	92.9186	105.927	99.5765	94.3396	160.129
SBULL_10629.mrna1	137	DNA-directed RNA polymerase I subunit RPA12	6	F:GO:0001054; F:GO:0003676; C:GO:0005736; P:GO:0006363; P:GO:0006379; F:GO:0008270	F:RNA polymerase I activity; F:nucleic acid binding; C:RNA polymerase I complex; P:termination of RNA polymerase I transcription; P:mRNA cleavage; F:zinc ion binding	EC:2.7.7.6	DNA-directed RNA polymerase				NP_524439.1 RpI12 [Drosophila melanogaster]		9	19	505	15	139	10	5	71	76	126	40	59	118	305		2.3085	9.8903	37.7274	7.17485	108.847	4.16628	2.558	22.9609	27.8118	37.766	15.8287	23.8051	26.5262	262.624
SBULL_10640.mrna1	253	vacuolar-sorting protein SNF8	8	C:GO:0000814; P:GO:0008283; P:GO:0008593; P:GO:0036258; P:GO:0042059; P:GO:0042981; P:GO:0043328; P:GO:0045450	C:ESCRT II complex; P:cell proliferation; P:regulation of Notch signaling pathway; P:multivesicular body assembly; P:negative regulation of epidermal growth factor receptor signaling pathway; P:regulation of apoptotic process; P:protein transport to vacuole involved in ubiquitin-dependent protein catabolic process via the multivesicular body sorting pathway; P:bicoid mRNA localization						NP_650987.1 larsen [Drosophila melanogaster]		87	359	864	41	151	110	60	394	303	553	357	384	723	113		12.7052	80.3036	26.2662	12.2678	48.9947	22.1245	11.4432	47.5133	41.3473	61.8081	52.6796	57.7748	60.6066	41.5052
SBULL_10641.mrna1	109	protein chibby homolog 1									NP_001262813.1 chibby, isoform C [Drosophila melanogaster]		18	0	5	3	2	1	1	30	18	17	9	6	23	1		11.0382	0	0.644357	3.89502	2.61473	0.837138	0.831173	16.1092	10.9373	8.46064	5.91358	4.01969	8.58506	1.28406
SBULL_10644.mrna1	100	transmembrane protein 26	1	C:GO:0016021	C:integral component of membrane						NP_651480.1 uncharacterized protein Dmel_CG14238 [Drosophila melanogaster]		0	0	2	0	0	0	0	0	0	1	0	0	0	0		0	0	0	0	0	0	0	0	0	0.621892	0	0	0	0
SBULL_10646.mrna1	88	transmembrane protein 26	1	C:GO:0016021	C:integral component of membrane								0	0	0	0	0	0	0	0	0	1	2	0	0	0		0	1.65657	0	0	0	0	0	0	0	0.874825	2.30996	0	0	0
SBULL_10651.mrna1	952	rho GTPase-activating protein gacF	2	C:GO:0005622; P:GO:0035556	C:intracellular; P:intracellular signal transduction						NP_523390.3 suppressor of cytokine signaling at 16D, isoform A [Drosophila melanogaster]		161	582	4832	203	381	295	672	754	742	845	885	771	1504	249		5.229	28.3044	34.5179	13.225	27.2708	12.8019	28.1971	19.0255	21.1862	19.7616	27.3251	24.2721	26.38	20.4378
SBULL_10659.mrna1	342	secretory carrier-associated membrane protein 1	7	P:GO:0007274; P:GO:0007616; C:GO:0008021; P:GO:0015031; C:GO:0016021; P:GO:0016079; C:GO:0043195	P:neuromuscular synaptic transmission; P:long-term memory; C:synaptic vesicle; P:protein transport; C:integral component of membrane; P:synaptic vesicle exocytosis; C:terminal bouton						NP_573023.2 scamp, isoform A [Drosophila melanogaster]		1058	8282	3582	452	631	730	927	1220	1107	1250	1364	1415	1929	265		104.025	1230.44	75.2299	84.7948	124.123	96.3589	116.257	99.3276	101.986	94.3237	135.887	143.732	109.17	67.4792
SBULL_1068.mrna1	81	cytochrome c oxidase assembly factor 5									NP_652380.2 uncharacterized protein Dmel_CG13018 [Drosophila melanogaster]		106	61	649	158	218	132	101	106	89	216	123	94	167	59		153.766	133.51	111.418	460.426	389.024	251.284	201.144	132.17	125.575	249.622	187.667	146.233	144.746	139.203
SBULL_10684.mrna1	307	alpha-tocopherol transfer protein-like									NP_001033984.1 uncharacterized protein Dmel_CG33966 [Drosophila melanogaster]		5	4	37	14	21	9	6	33	20	31	2	7	20	17		0.589668	0.708969	0.856106	3.3377	5.1724	1.42265	0.920519	3.08025	2.11245	2.68185	0.228432	0.815188	1.29767	4.92265
SBULL_10686.mrna1	766	hypothetical protein FF38_09799	4	F:GO:0003779; F:GO:0017048; P:GO:0030036; P:GO:0035317	F:actin binding; F:Rho GTPase binding; P:actin cytoskeleton organization; P:imaginal disc-derived wing hair organization						NP_612082.1 multiple wing hairs, isoform A [Drosophila melanogaster]		106	46	1160	36	70	19	11	554	946	476	804	338	1169	64		4.35209	2.83347	10.4067	2.96714	6.33073	1.04266	0.583885	17.7042	34.2092	14.0986	31.4396	13.4763	25.9683	6.62126
SBULL_10691.mrna1	311	alpha-tocopherol transfer protein-like									NP_001014558.1 uncharacterized protein Dmel_CG33514 [Drosophila melanogaster]		17	48	6	52	80	48	28	8	5	10	1	2	32	0		1.97268	8.37068	0.153174	12.196	20.3597	7.46511	4.22614	0.734433	0.519418	0.85087	0.112335	0.229076	2.04209	0
SBULL_10694.mrna1	312	alpha-tocopherol transfer protein-like									NP_001014558.1 uncharacterized protein Dmel_CG33514 [Drosophila melanogaster]		25	8	9	63	23	16	15	6	8	5	0	3	5	1		2.88941	1.38952	0.228848	14.7163	5.83016	2.47838	2.25487	0.548567	0.827663	0.423691	0	0.342206	0.317768	0.284003
SBULL_10696.mrna1	330	alpha-tocopherol transfer protein-like									NP_001014558.1 uncharacterized protein Dmel_CG33514 [Drosophila melanogaster]		2	30	86	276	676	157	51	3	4	5	2	4	0	355		0.215635	4.86005	2.01718	60.1008	159.452	22.6801	7.1474	0.255437	0.385396	0.394578	0.208376	0.424923	0	94.0309
SBULL_10700.mrna1	309	alpha-tocopherol transfer protein-like									NP_610510.2 uncharacterized protein Dmel_CG12926 [Drosophila melanogaster]		130	29	132	70	117	223	36	17	12	25	8	14	37	173		13.6866	4.3951	4.452	13.2416	28.2195	29.6328	5.478	2.77698	2.5139	3.7749	2.15209	3.00271	4.50415	78.1499
SBULL_10713.mrna1	89	coiled-coil domain-containing protein 103									NP_610675.1 uncharacterized protein Dmel_CG13202 [Drosophila melanogaster]		118	0	3	6	1	0	0	75	33	19	0	7	20	0		86.2296	0	0.619545	11.7734	0	0	0	70.0058	34.8555	16.4372	0	8.15189	12.9767	0
SBULL_10714.mrna1	313	alpha-tocopherol transfer protein-like									NP_001014558.1 uncharacterized protein Dmel_CG33514 [Drosophila melanogaster]		10	7	49	31	43	9	3	34	61	17	10	0	10	113		1.03604	0.864984	1.16504	5.11834	7.82696	0.925676	0.449161	3.09586	6.28516	1.43467	1.11418	0	0.632942	31.9694
SBULL_10716.mrna1	49	---NA---											0	0	1	0	0	0	0	0	1	0	0	0	1	0		0	0	0	0	0	0	0	0	8.50435	0	0	0	5.22419	0
SBULL_10718.mrna1	320	alpha-tocopherol transfer protein-like									NP_723200.1 uncharacterized protein Dmel_CG31636, isoform A [Drosophila melanogaster]		185	33	3515	56	130	15	10	884	572	309	31	10	39	3		15.9032	4.88051	78.7154	10.4088	21.6199	1.95102	1.16499	78.256	57.2989	25.3527	3.35801	1.10447	2.3999	0.826589
SBULL_10743.mrna1	317	alpha-tocopherol transfer protein-like									NP_001014558.1 uncharacterized protein Dmel_CG33514 [Drosophila melanogaster]		0	10	4	20	40	7	0	3	0	1	1	0	3	43		0	1.70278	0.0997305	4.57933	9.94201	1.06295	0	0.268775	0	0.0830364	0.109628	0	0.186832	11.9818
SBULL_10746.mrna1	1391	hypothetical protein FF38_09796	7	C:GO:0005576; P:GO:0007305; P:GO:0007362; P:GO:0008293; P:GO:0009950; C:GO:0016020; C:GO:0016021	C:extracellular region; P:vitelline membrane formation involved in chorion-containing eggshell formation; P:terminal region determination; P:torso signaling pathway; P:dorsal/ventral axis specification; C:membrane; C:integral component of membrane						NP_001097246.3 closca [Drosophila melanogaster]		54	50	4757	45	964	1	1	16	13	26	9	12	21	3		1.17456	1.63091	22.8575	1.96145	46.2391	0.0290516	0.0280767	0.269756	0.248015	0.406279	0.185673	0.252418	0.246112	0.165517
SBULL_10747.mrna1	474	uncharacterized protein LOC111678312	2	P:GO:0032501; P:GO:0048856	P:multicellular organismal process; P:anatomical structure development						NP_001097246.3 closca [Drosophila melanogaster]		1	12	1306	0	152	3	2	5	5	12	10	6	17	4		0.0701466	1.2637	19.6988	0	23.4466	0.28157	0.181802	0.274716	0.310863	0.611077	0.672308	0.411295	0.64927	0.70007
SBULL_1075.mrna1	883	guanylate kinase-associated protein mars	3	C:GO:0005819; P:GO:0006996; P:GO:0007049	C:spindle; P:organelle organization; P:cell cycle						NP_610878.1 mars, isoform A [Drosophila melanogaster]		1156	3981	18899	38	859	42	82	429	219	132	413	549	371	24		40.6998	210.145	146.194	2.6843	66.6406	1.976	3.73065	11.7414	6.7825	3.34839	13.8314	18.7465	7.05825	2.13345
SBULL_10756.mrna1	283	hypothetical protein FF38_09799	3	F:GO:0003779; F:GO:0017048; P:GO:0030036	F:actin binding; F:Rho GTPase binding; P:actin cytoskeleton organization						NP_001261244.1 multiple wing hairs, isoform C [Drosophila melanogaster]		7	4	221	4	12	5	0	60	145	31	80	27	140	12		0.392198	0.589607	5.71854	0.529182	2.57828	0.175309	0	6.22574	17.0252	2.98128	10.1574	3.49535	10.0979	3.83559
SBULL_10761.mrna1	139	transmembrane protein 234 homolog	1	C:GO:0016021	C:integral component of membrane						NP_610502.1 uncharacterized protein Dmel_CG12929, isoform A [Drosophila melanogaster]		32	16	228	10	14	14	12	124	79	133	128	90	198	52		11.9928	7.93197	17.662	7.75814	11.3373	7.09935	5.9751	38.9732	28.0968	38.7433	49.2276	35.2919	43.2585	44.0421
SBULL_10764.mrna1	98	death-associated protein 1	5	P:GO:0010507; P:GO:0034198; P:GO:0045892; F:GO:0070513; P:GO:0097190	P:negative regulation of autophagy; P:cellular response to amino acid starvation; P:negative regulation of transcription, DNA-templated; F:death domain binding; P:apoptotic signaling pathway						NP_610676.2 uncharacterized protein Dmel_CG12384 [Drosophila melanogaster]		878	933	2824	1260	1340	1399	879	1069	1253	1952	1917	2010	3897	302		693.402	1119.74	389.574	2103.12	2217.37	1520.54	959.298	991.665	1333.1	1654.92	2207.44	2287.87	2446.9	482.732
SBULL_10771.mrna1	392	neuropeptide FF receptor 2	3	P:GO:0007186; F:GO:0008188; C:GO:0016021	P:G-protein coupled receptor signaling pathway; F:neuropeptide receptor activity; C:integral component of membrane						NP_724812.2 uncharacterized protein Dmel_CG30340 [Drosophila melanogaster]		4	4	13	4	3	5	6	2	9	3	4	7	2	12		0.350279	0.394552	0.231575	0.529608	0.577117	0.586216	0.568196	0.137701	0.701186	0.191438	0.336993	0.601301	0.095719	2.6065
SBULL_10774.mrna1	263	alpha-tocopherol transfer protein-like									NP_001033984.1 uncharacterized protein Dmel_CG33966 [Drosophila melanogaster]		15	17	118	73	120	61	79	7	12	17	4	6	5	16		2.01225	3.02599	3.4095	19.5135	32.1018	10.2201	14.2404	0.800847	1.55352	1.80261	0.559972	0.856428	0.397634	5.59852
SBULL_10775.mrna1	357	uroporphyrinogen decarboxylase isoform X2	3	F:GO:0004853; C:GO:0005829; P:GO:0006782	F:uroporphyrinogen decarboxylase activity; C:cytosol; P:protoporphyrinogen IX biosynthetic process	EC:4.1.1.37	Uroporphyrinogen decarboxylase				NP_610501.1 updo [Drosophila melanogaster]		588	602	1811	506	830	1412	562	361	326	557	599	491	725	379		59.0665	90.0548	45.7566	103.375	186.668	188.792	72.5168	45.3104	45.3327	60.7391	87.1798	77.7178	65.0316	108.471
SBULL_10783.mrna1	125	60S ribosomal protein L31	3	P:GO:0002181; F:GO:0003735; C:GO:0022625	P:cytoplasmic translation; F:structural constituent of ribosome; C:cytosolic large ribosomal subunit						NP_724805.1 ribosomal protein L31, isoform C [Drosophila melanogaster]		3528	3962	23300	4726	8467	7111	3026	5551	5319	9322	5770	4941	11036	15521		1654.72	2785.13	2139.81	4480.05	9307.34	4524.66	1882.33	3431.24	3631.45	5209.23	4371.3	3869.28	4534.66	18225.7
SBULL_10788.mrna1	226	glutathione S-transferase theta-1	2	F:GO:0004364; P:GO:0006749	F:glutathione transferase activity; P:glutathione metabolic process	EC:2.5.1.18	Glutathione transferase				NP_610509.2 glutathione S transferase T1 [Drosophila melanogaster]		32	38	171	27	69	46	23	96	110	206	82	77	147	112		6.16461	9.54216	6.5254	9.66491	26.1763	10.6462	5.06479	16.521	22.2101	35.074	17.7968	15.8555	17.5697	49.637
SBULL_10789.mrna1	223	glutathione S-transferase theta-1	2	F:GO:0004364; P:GO:0006749	F:glutathione transferase activity; P:glutathione metabolic process	EC:2.5.1.18	Glutathione transferase				NP_610509.2 glutathione S transferase T1 [Drosophila melanogaster]		17	4	939	30	59	44	61	696	557	885	599	592	1115	81		3.40881	1.35008	37.7501	8.75361	18.8179	10.1226	14.7777	139.621	127.208	167.826	146.54	152.825	151.384	40.1466
SBULL_10801.mrna1	43	---NA---											0	0	1	0	1	0	0	3	0	3	2	0	0	0		0	0	7.74425	0	680.408	0	0	37.8932	0	35.1206	30.9118	0	0	0
SBULL_1081.mrna1	480	protein lin-54 homolog	11	P:GO:0000122; C:GO:0000785; F:GO:0003677; F:GO:0005515; C:GO:0005634; C:GO:0005700; P:GO:0007049; P:GO:0007307; P:GO:0008340; P:GO:0030317; C:GO:0031523	P:negative regulation of transcription by RNA polymerase II; C:chromatin; F:DNA binding; F:protein binding; C:nucleus; C:polytene chromosome; P:cell cycle; P:eggshell chorion gene amplification; P:determination of adult lifespan; P:flagellated sperm motility; C:Myb complex						NP_610879.1 Myb-interacting protein 120, isoform A [Drosophila melanogaster]		220	116	508	41	77	54	142	211	161	137	134	126	194	54		13.828	11.9364	7.56559	5.42682	11.5557	4.99534	12.5425	11.4242	9.86399	6.87486	8.87772	8.51139	7.3014	9.31851
SBULL_10812.mrna1	529	aldehyde dehydrogenase	9	F:GO:0004029; C:GO:0005759; P:GO:0006090; P:GO:0006117; F:GO:0008774; F:GO:0043878; P:GO:0045471; P:GO:0055114; P:GO:1901215	F:aldehyde dehydrogenase (NAD) activity; C:mitochondrial matrix; P:pyruvate metabolic process; P:acetaldehyde metabolic process; F:acetaldehyde dehydrogenase (acetylating) activity; F:glyceraldehyde-3-phosphate dehydrogenase (NAD+) (non-phosphorylating) activity; P:response to ethanol; P:oxidation-reduction process; P:negative regulation of neuron death	EC:1.2.1.10; EC:1.2.1.3	Acetaldehyde dehydrogenase (acetylating); Aldehyde dehydrogenase (NAD(+))				NP_609285.1 aldehyde dehydrogenase, isoform A [Drosophila melanogaster]		1522	2735	7327	2647	4571	2886	2539	4326	3877	6555	5200	4982	7340	2265		92.6459	248.951	96.5563	323.003	610.394	234.767	201.405	209.325	212.283	293.973	307.887	300.764	246.884	350.567
SBULL_10817.mrna1	312	alpha-tocopherol transfer protein									NP_001033984.1 uncharacterized protein Dmel_CG33966 [Drosophila melanogaster]		12	20	190	112	208	94	16	18	22	19	15	14	45	85		1.38692	3.4738	4.7041	25.9287	52.7249	14.5605	2.40519	1.6457	2.27607	1.61003	1.67813	1.59696	2.85992	24.1402
SBULL_1082.mrna1	224	protein lin-54 homolog	5	F:GO:0003746; F:GO:0003924; F:GO:0005525; C:GO:0005622; P:GO:0006414	F:translation elongation factor activity; F:GTPase activity; F:GTP binding; C:intracellular; P:translational elongation	EC:3.6.1.15	Nucleoside-triphosphate phosphatase						29	47	194	11	38	21	65	51	41	61	48	44	79	19		3.74439	8.31863	6.83954	2.53713	10.5204	2.63471	7.22606	7.2938	6.63518	8.08564	8.40001	7.85099	7.85368	8.15435
SBULL_10853.mrna1	91	trypsin alpha-4-like	4	F:GO:0004252; C:GO:0005615; P:GO:0006508; C:GO:0016021	F:serine-type endopeptidase activity; C:extracellular space; P:proteolysis; C:integral component of membrane	EC:3.4.21	Acting on peptide bonds (peptidases)				NP_725035.1 uncharacterized protein Dmel_CG30031 [Drosophila melanogaster]		0	3	4	54	143	0	0	0	0	0	0	0	0	9		0	4.56295	0.390258	69.6858	138.724	0	0	0	0	0	0	0	0	16.5701
SBULL_10855.mrna1	499	protein twist	15	P:GO:0001710; F:GO:0003677; F:GO:0003705; C:GO:0005634; C:GO:0005737; P:GO:0007370; P:GO:0007435; P:GO:0007443; P:GO:0010629; P:GO:0016202; P:GO:0031032; F:GO:0042803; P:GO:0045944; F:GO:0046982; P:GO:0048747	P:mesodermal cell fate commitment; F:DNA binding; F:transcription factor activity, RNA polymerase II distal enhancer sequence-specific binding; C:nucleus; C:cytoplasm; P:ventral furrow formation; P:salivary gland morphogenesis; P:Malpighian tubule morphogenesis; P:negative regulation of gene expression; P:regulation of striated muscle tissue development; P:actomyosin structure organization; F:pro…						NP_523816.2 twist, isoform A [Drosophila melanogaster]		4	257	110	8	5	14	0	41	23	23	233	272	297	29		0.26454	24.7199	1.47388	1.06452	0.727329	1.23866	0	2.12199	1.34702	1.10329	14.7561	17.5637	10.6851	4.79174
SBULL_10859.mrna1	515	leucine-rich repeat neuronal protein 1	1	C:GO:0016021	C:integral component of membrane						NP_723576.1 uncharacterized protein Dmel_CG5096 [Drosophila melanogaster]		406	115	1054	636	1093	664	147	274	191	411	137	525	445	545		23.0317	8.71474	14.0373	64.0413	106.104	44.0378	9.0071	13.6735	10.7857	19.0095	8.36573	32.687	15.4366	86.9408
SBULL_10863.mrna1	86	odorant receptor 7a-like	6	F:GO:0004984; F:GO:0005549; C:GO:0005886; P:GO:0007165; C:GO:0016021; P:GO:0050911	F:olfactory receptor activity; F:odorant binding; C:plasma membrane; P:signal transduction; C:integral component of membrane; P:detection of chemical stimulus involved in sensory perception of smell						NP_523822.1 odorant receptor 59b [Drosophila melanogaster]		1	0	0	1	0	0	0	72	41	29	0	2	17	0		1.19645	0	0	2.68153	0	0	0	74.5099	48.0121	27.8151	0	2.58226	12.2291	0
SBULL_10864.mrna1	71	---NA---											0	1	3	0	0	0	0	0	0	2	0	0	0	0		0	0	1.19839	0	0	0	0	0	0	3.51372	0	0	0	0
SBULL_10870.mrna1	306	thioredoxin domain-containing protein	3	C:GO:0005623; C:GO:0016021; P:GO:0045454	C:cell; C:integral component of membrane; P:cell redox homeostasis						NP_651326.1 uncharacterized protein Dmel_CG11790, isoform A [Drosophila melanogaster]		174	184	2040	164	316	251	133	1210	1259	1590	1511	1393	2245	350		20.6045	32.7465	51.7316	38.5425	81.7967	39.8392	20.4892	113.417	133.538	138.131	173.305	162.904	146.276	101.457
SBULL_10874.mrna1	46	---NA---											0	0	0	0	0	0	0	5	1	16	8	7	13	0		0	0	0	0	0	0	0	48.1753	10.9028	142.881	94.319	84.1473	87.0683	0
SBULL_10876.mrna1	1145	CLUMA_CG018934, isoform A											181	21	486	35	17	21	18	681	606	415	1008	829	1136	122		4.83109	0.840646	2.85719	1.87289	1.00033	0.74878	0.620409	14.1041	14.2022	7.96612	25.5454	21.421	16.3545	8.24577
SBULL_10888.mrna1	260	AGAP013057-PA-like protein											22	2	58	2	1	0	2	97	95	67	152	136	148	15		3.06407	0.438851	1.73034	0.591429	0.319449	0	0.380488	11.2709	12.4909	7.21543	21.6115	19.7157	11.9539	5.32426
SBULL_10891.mrna1	355	putative nuclease HARBI1									NP_652056.2 uncharacterized protein Dmel_CG12253 [Drosophila melanogaster]		85	292	849	39	91	58	38	146	125	120	190	183	303	49		8.38293	43.7056	19.352	7.96074	19.0533	7.79361	4.7396	15.2346	14.7764	11.6706	22.9217	22.5954	20.5315	13.4045
SBULL_10896.mrna1	172	transmembrane protein 208	1	C:GO:0016021	C:integral component of membrane						NP_611072.2 uncharacterized protein Dmel_CG8320 [Drosophila melanogaster]		23	16	744	8	97	29	18	140	129	138	124	106	197	63		6.28068	6.31351	43.4263	4.28851	56.3446	10.5785	6.20026	38.2819	37.9949	34.2916	38.9925	36.0215	36.2738	44.7597
SBULL_10899.mrna1	244	peroxisomal membrane protein 11B	2	C:GO:0005779; P:GO:0016559	C:integral component of peroxisomal membrane; P:peroxisome fission						NP_611071.1 peroxin 11 [Drosophila melanogaster]		106	306	774	94	96	66	91	414	413	549	353	357	755	81		16.6662	72.3475	25.1486	29.9525	33.3363	14.0623	18.8527	52.4787	59.2404	64.4995	54.7536	56.4598	66.5261	31.145
SBULL_10901.mrna1	276	probable methylthioribulose-1-phosphate dehydratase	5	C:GO:0005737; F:GO:0008270; P:GO:0019284; P:GO:0019509; F:GO:0046570	C:cytoplasm; F:zinc ion binding; P:L-methionine salvage from S-adenosylmethionine; P:L-methionine salvage from methylthioadenosine; F:methylthioribulose 1-phosphate dehydratase activity	EC:4.2.1.109	Methylthioribulose 1-phosphate dehydratase				NP_572916.1 uncharacterized protein Dmel_CG11134, isoform A [Drosophila melanogaster]		220	358	619	155	284	317	326	281	286	481	399	501	910	229		34.8316	79.5681	20.4711	49.7491	91.0961	62.1064	57.8624	45.3688	49.3965	68.9887	75.464	95.9454	99.0842	95.2586
SBULL_10904.mrna1	1107	ATP-citrate synthase isoform X1	8	F:GO:0003878; F:GO:0005524; C:GO:0005737; P:GO:0006085; P:GO:0006101; P:GO:0006629; F:GO:0046872; F:GO:0048037	F:ATP citrate synthase activity; F:ATP binding; C:cytoplasm; P:acetyl-CoA biosynthetic process; P:citrate metabolic process; P:lipid metabolic process; F:metal ion binding; F:cofactor binding	EC:2.3.3.8	ATP citrate synthase				NP_523755.2 ATP citrate lyase, isoform D [Drosophila melanogaster]		1477	1648	29635	1008	4005	1210	1845	4150	4498	3745	4600	4636	5354	1093		35.5728	61.152	176.651	49.8601	222.817	35.2541	59.9434	89.0936	109.27	74.5163	120.84	124.174	79.8986	76.4644
SBULL_10915.mrna1	286	palmitoyltransferase ZDHHC3	4	C:GO:0005794; C:GO:0016021; P:GO:0018345; F:GO:0019706	C:Golgi apparatus; C:integral component of membrane; P:protein palmitoylation; F:protein-cysteine S-palmitoyltransferase activity	EC:2.3.1.225	Protein S-acyltransferase				NP_611070.1 uncharacterized protein Dmel_CG8314 [Drosophila melanogaster]		868	88	557	92	151	112	230	280	165	212	139	137	189	63		105.766	16.8691	14.9429	24.0127	38.4431	17.987	37.4517	28.6535	19.1069	20.1075	17.4056	17.4916	13.4445	19.5633
SBULL_10920.mrna1	3133	titin isoform X3	1	F:GO:0003824	F:catalytic activity						NP_001261018.1 Stretchin-Mlck, isoform S [Drosophila melanogaster]		253	152	3232	1589	1244	2313	2252	2277	2259	2504	263	115	462	334		2.33455	2.08867	6.47956	28.7733	24.6793	28.6914	27.2401	18.3316	20.8178	19.1554	2.86736	1.15309	2.57485	8.12903
SBULL_1093.mrna1	49	protein lin-54 homolog	5	F:GO:0003746; F:GO:0003924; F:GO:0005525; C:GO:0005622; P:GO:0006414	F:translation elongation factor activity; F:GTPase activity; F:GTP binding; C:intracellular; P:translational elongation	EC:3.6.1.15	Nucleoside-triphosphate phosphatase						97	3	29	12	7	3	6	43	12	16	7	5	22	0		2669.63	827.898	52.8407	2547.18	1382.89	75.8497	1046.26	323.165	102.052	111.449	64.3738	46.8829	114.932	0
SBULL_10939.mrna1	245	myb/SANT-like DNA-binding domain-containing protein 4 isoform X1									NP_726343.1 apontic, isoform D [Drosophila melanogaster]		64	47	248	10	28	19	6	126	101	123	174	175	230	11		10.103	11.1607	8.34906	3.20286	9.67048	4.02601	1.23616	15.8815	14.4055	14.369	26.8365	27.52	20.1517	4.20767
SBULL_10946.mrna1	69	titin homolog	1	F:GO:0003824	F:catalytic activity						NP_001261019.1 Stretchin-Mlck, isoform U [Drosophila melanogaster]		1	0	10	3	0	2	0	9	16	22	4	0	9	0		3.95121	0	2.69756	10.9421	0	6.07594	0	19.1253	38.4743	43.3301	10.4011	0	13.2945	0
SBULL_10949.mrna1	865	membralin isoform X2	2	C:GO:0016021; P:GO:0048190	C:integral component of membrane; P:wing disc dorsal/ventral pattern formation						NP_725521.1 uncharacterized protein Dmel_CG8405, isoform A [Drosophila melanogaster]		1167	22219	17300	589	1391	709	1117	1271	937	1674	1207	1056	1678	309		41.9359	1198.27	136.557	42.3978	103.188	34.1053	51.9611	35.5718	29.6746	43.4227	41.3354	36.8733	32.6449	27.531
SBULL_10955.mrna1	78	39S ribosomal protein L34, mitochondrial	3	F:GO:0003735; C:GO:0005840; P:GO:0006412	F:structural constituent of ribosome; C:ribosome; P:translation						NP_001036552.1 mitochondrial ribosomal protein L34 [Drosophila melanogaster]		0	0	0	0	0	0	0	0	0	0	0	0	0	0		5.25013	8.20816	17.7025	24.9178	59.7025	7.48755	2.62418	38.871	50.2693	73.3405	57.7566	77.9414	56.9354	132.883
SBULL_10959.mrna1	211	Ras-like GTP-binding protein Rho1	58	P:GO:0001745; F:GO:0003924; F:GO:0005525; C:GO:0005856; P:GO:0006897; P:GO:0007173; P:GO:0007264; P:GO:0007298; P:GO:0007349; P:GO:0007368; P:GO:0007370; P:GO:0007374; P:GO:0007377; P:GO:0007395; P:GO:0007405; P:GO:0007422; P:GO:0007435; P:GO:0007480; P:GO:0008045; P:GO:0008347; C:GO:0016324; P:GO:0016476; F:GO:0019900; P:GO:0030334; P:GO:0030589; P:GO:0030950; P:GO:0031532; P:GO:0032456; P:GO:00…	P:compound eye morphogenesis; F:GTPase activity; F:GTP binding; C:cytoskeleton; P:endocytosis; P:epidermal growth factor receptor signaling pathway; P:small GTPase mediated signal transduction; P:border follicle cell migration; P:cellularization; P:determination of left/right symmetry; P:ventral furrow formation; P:posterior midgut invagination; P:germ-band extension; P:dorsal closure, spreading …	EC:3.6.1.15	Nucleoside-triphosphate phosphatase				NP_995850.1 Rho1, isoform F [Drosophila melanogaster]		948	1062	6061	510	974	1322	792	2829	2655	3226	3720	3334	5092	806		164.576	287.751	255.509	184.675	392.757	260.024	151.99	488.033	512.701	516.963	777.019	705.632	604.413	374.634
SBULL_10960.mrna1	89	---NA---											1371	1408	1806	509	835	2109	1363	834	720	1069	964	926	1550	166		618.511	866.943	231.297	576.897	735.066	1288.99	997.55	1015.55	1031.93	1220.68	1501.94	1416.1	1315.84	320.768
SBULL_10963.mrna1	312	aldose reductase	2	F:GO:0016491; P:GO:0055114	F:oxidoreductase activity; P:oxidation-reduction process						NP_610235.1 uncharacterized protein Dmel_CG9436 [Drosophila melanogaster]		210	302	1576	285	317	536	1086	397	331	689	343	560	640	148		23.3464	50.7175	37.5565	58.1643	76.806	80.7023	161.298	36.2969	34.2445	58.3846	38.3731	63.8784	40.6744	41.7484
SBULL_10967.mrna1	1296	Polynucleotide 5'-hydroxyl-kinase NOL9	3	F:GO:0005524; F:GO:0016301; P:GO:0016310	F:ATP binding; F:kinase activity; P:phosphorylation						NP_611084.2 uncharacterized protein Dmel_CG8414 [Drosophila melanogaster]		1165	1911	5418	98	491	192	215	421	316	349	448	490	631	550		27.1032	66.6773	27.7133	4.50721	25.1034	6.00765	6.44156	7.64707	6.49509	5.87543	9.95739	11.1044	7.96718	32.6619
SBULL_1097.mrna1	618	sodium-dependent nutrient amino acid transporter 1 isoform X1	6	P:GO:0003333; F:GO:0005328; F:GO:0005416; C:GO:0005887; P:GO:0006836; P:GO:0010226	P:amino acid transmembrane transport; F:neurotransmitter:sodium symporter activity; F:amino acid:cation symporter activity; C:integral component of plasma membrane; P:neurotransmitter transport; P:response to lithium ion						NP_611364.2 Lithium-inducible SLC6 transporter, isoform D [Drosophila melanogaster]		33	31	75	41	58	26	7	22	14	26	31	35	46	10		1.71546	2.41828	0.780638	4.17832	6.065	1.80722	0.470858	0.892254	0.642509	0.977328	1.53845	1.77101	1.29684	1.30502
SBULL_10985.mrna1	1495	dystroglycan isoform X3	4	F:GO:0005509; P:GO:0007016; C:GO:0016010; C:GO:0016021	F:calcium ion binding; P:cytoskeletal anchoring at plasma membrane; C:dystrophin-associated glycoprotein complex; C:integral component of membrane						NP_788363.1 dystroglycan, isoform D [Drosophila melanogaster]		2123	2338	15246	1272	1331	3164	2043	3102	3074	3679	2667	1607	2728	414		36.5932	62.799	66.4275	45.5521	49.561	67.4355	43.5321	48.4872	54.3718	53.2986	51.0109	31.3393	29.6409	21.0417
SBULL_10996.mrna1	50	---NA---											1	0	170	1	11	1	0	46	50	92	58	35	45	5		0	0	273.147	0	241.407	68.1229	0	319.628	393.135	592.483	493.139	303.419	217.351	23.8039
SBULL_11001.mrna1	278	GTP-binding protein Rit2	9	F:GO:0003924; F:GO:0005516; F:GO:0005525; P:GO:0006970; P:GO:0006979; P:GO:0007165; P:GO:0009408; C:GO:0016020; P:GO:0042594	F:GTPase activity; F:calmodulin binding; F:GTP binding; P:response to osmotic stress; P:response to oxidative stress; P:signal transduction; P:response to heat; C:membrane; P:response to starvation	EC:3.6.1.15	Nucleoside-triphosphate phosphatase				NP_477211.1 Ras-related protein interacting with calmodulin, isoform A [Drosophila melanogaster]		12	16	109	163	76	238	307	20	12	28	1	12	8	66		1.47133	2.21206	2.822	39.5348	18.1692	35.6975	45.8221	2.12467	1.44254	2.75689	0.129992	1.59049	0.590762	21.5622
SBULL_11005.mrna1	1171	hypothetical protein FF38_11497	3	C:GO:0016021; C:GO:0044424; P:GO:0051647	C:integral component of membrane; C:intracellular part; P:nucleus localization						NP_001260739.1 klaroid, isoform C [Drosophila melanogaster]		398	401	2815	205	345	525	597	545	571	709	550	571	762	566		10.348	15.6367	16.1192	10.7121	19.4234	18.0714	19.9252	11.0213	13.0665	13.2888	13.6099	14.4066	10.7116	37.3662
SBULL_11012.mrna1	298	succinate dehydrogenase [ubiquinone] iron-sulfur subunit, mitochondrial	9	C:GO:0005743; P:GO:0006099; P:GO:0006121; F:GO:0008177; F:GO:0009055; F:GO:0046872; F:GO:0051537; F:GO:0051538; F:GO:0051539	C:mitochondrial inner membrane; P:tricarboxylic acid cycle; P:mitochondrial electron transport, succinate to ubiquinone; F:succinate dehydrogenase (ubiquinone) activity; F:electron transfer activity; F:metal ion binding; F:2 iron, 2 sulfur cluster binding; F:3 iron, 4 sulfur cluster binding; F:4 iron, 4 sulfur cluster binding	EC:1.3.99.1; EC:1.3.5.1	Deleted entry; Succinate dehydrogenase (quinone)				NP_477101.1 succinate dehydrogenase, subunit B (iron-sulfur) [Drosophila melanogaster]		426	389	4190	6991	2721	6845	8091	1367	1217	2466	863	695	1069	2149		35.994	52.9967	105.947	1385.79	547.819	849.995	902.419	139.671	141.476	234.631	109.666	91.1229	76.7946	648.936
SBULL_11013.mrna1	93	---NA---											99	82	424	1759	605	1054	734	194	124	295	103	81	164	210		91.8769	116.544	78.5599	3534.32	1176.37	1349.93	947.215	231.518	167.222	320.345	164.753	123.939	128.404	386.694
SBULL_11018.mrna1	805	rap guanine nucleotide exchange factor 4 isoform X2	5	F:GO:0004691; F:GO:0005085; C:GO:0005622; P:GO:0006468; P:GO:0007264	F:cAMP-dependent protein kinase activity; F:guanyl-nucleotide exchange factor activity; C:intracellular; P:protein phosphorylation; P:small GTPase mediated signal transduction	EC:2.7.11; EC:2.7.11.11	Transferring phosphorus-containing groups; cAMP-dependent protein kinase				NP_724498.1 exchange protein directly activated by cAMP, isoform D [Drosophila melanogaster]		41	233	1148	95	91	107	134	2407	3270	1182	330	264	509	88		1.59501	13.5399	9.62963	7.33952	7.45621	5.56322	6.73833	72.85	111.992	33.1567	12.2214	9.96885	10.7086	8.6328
SBULL_11019.mrna1	216	rap guanine nucleotide exchange factor 4 isoform X1	5	F:GO:0004691; F:GO:0005085; C:GO:0005622; P:GO:0006468; P:GO:0032487	F:cAMP-dependent protein kinase activity; F:guanyl-nucleotide exchange factor activity; C:intracellular; P:protein phosphorylation; P:regulation of Rap protein signal transduction	EC:2.7.11; EC:2.7.11.11	Transferring phosphorus-containing groups; cAMP-dependent protein kinase				NP_001097202.2 exchange protein directly activated by cAMP, isoform E [Drosophila melanogaster]		1	17	121	12	8	4	9	306	500	185	63	30	61	5		0.187559	4.23495	4.02671	4.579	2.86755	0.756107	1.96306	46.129	85.2919	25.8479	11.6211	5.64237	6.39212	2.25046
SBULL_1103.mrna1	637	low-density lipoprotein receptor-related protein 6	16	P:GO:0001745; C:GO:0005769; C:GO:0005770; C:GO:0005886; P:GO:0007367; P:GO:0007399; P:GO:0007616; P:GO:0008587; C:GO:0016021; F:GO:0017147; P:GO:0035223; F:GO:0042813; P:GO:0048076; P:GO:0060070; F:GO:0071936; P:GO:0090254	P:compound eye morphogenesis; C:early endosome; C:late endosome; C:plasma membrane; P:segment polarity determination; P:nervous system development; P:long-term memory; P:imaginal disc-derived wing margin morphogenesis; C:integral component of membrane; F:Wnt-protein binding; P:leg disc pattern formation; F:Wnt-activated receptor activity; P:regulation of compound eye pigmentation; P:canonical Wnt…						NP_524737.2 arrow [Drosophila melanogaster]		174	214	2280	23	21	9	35	288	260	192	259	266	266	33		8.64582	16.1418	25.3011	2.3228	2.32396	0.604871	2.2762	11.2904	11.5338	6.97618	12.4242	13.0102	7.24869	4.16674
SBULL_11030.mrna1	352	uncharacterized protein LOC111677845	8	F:GO:0000166; F:GO:0004016; F:GO:0004383; C:GO:0005886; P:GO:0006182; C:GO:0008074; C:GO:0016021; P:GO:0035556	F:nucleotide binding; F:adenylate cyclase activity; F:guanylate cyclase activity; C:plasma membrane; P:cGMP biosynthetic process; C:guanylate cyclase complex, soluble; C:integral component of membrane; P:intracellular signal transduction	EC:4.6.1.1; EC:4.6.1.2	Adenylate cyclase; Guanylate cyclase				NP_001033958.1 uncharacterized protein Dmel_CG33958 [Drosophila melanogaster]		0	0	16	1	0	0	0	1	0	1	0	2	0	3		0	0	0.24137	0.201095	0	0	0	0.0785489	0	0.0728016	0	0.196001	0	0.738465
SBULL_11036.mrna1	326	uncharacterized protein LOC111677845	8	F:GO:0000166; F:GO:0004016; F:GO:0004383; C:GO:0005886; P:GO:0006182; C:GO:0008074; C:GO:0016021; P:GO:0035556	F:nucleotide binding; F:adenylate cyclase activity; F:guanylate cyclase activity; C:plasma membrane; P:cGMP biosynthetic process; C:guanylate cyclase complex, soluble; C:integral component of membrane; P:intracellular signal transduction	EC:4.6.1.1; EC:4.6.1.2	Adenylate cyclase; Guanylate cyclase				NP_001033958.1 uncharacterized protein Dmel_CG33958 [Drosophila melanogaster]		0	0	14	1	0	0	1	0	0	5	0	0	2	0		0	0	0.313152	0.221087	0	0	0.142286	0	0	0.400697	0	0	0.120209	0
SBULL_1104.mrna1	452	low-density lipoprotein receptor-related protein 6	16	P:GO:0001745; C:GO:0005769; C:GO:0005770; C:GO:0005886; P:GO:0007367; P:GO:0007399; P:GO:0007616; P:GO:0008587; C:GO:0016021; F:GO:0017147; P:GO:0035223; F:GO:0042813; P:GO:0048076; P:GO:0060070; F:GO:0071936; P:GO:0090254	P:compound eye morphogenesis; C:early endosome; C:late endosome; C:plasma membrane; P:segment polarity determination; P:nervous system development; P:long-term memory; P:imaginal disc-derived wing margin morphogenesis; C:integral component of membrane; F:Wnt-protein binding; P:leg disc pattern formation; F:Wnt-activated receptor activity; P:regulation of compound eye pigmentation; P:canonical Wnt…						NP_524737.2 arrow [Drosophila melanogaster]		220	347	1617	40	24	26	71	200	193	131	165	201	193	25		15.4133	36.826	25.6423	4.92371	3.74704	2.28076	6.24375	11.6183	12.6868	7.05315	11.7287	14.5678	7.79347	4.616
SBULL_11041.mrna1	812	serine proteinase stubble	7	C:GO:0005576; C:GO:0005768; P:GO:0007391; P:GO:0007560; F:GO:0016787; P:GO:0050793; P:GO:0050794	C:extracellular region; C:endosome; P:dorsal closure; P:imaginal disc morphogenesis; F:hydrolase activity; P:regulation of developmental process; P:regulation of cellular process						NP_724424.1 scarface, isoform A [Drosophila melanogaster]		27	67	9856	212	178	851	194	2047	897	6018	553	1234	631	1353		1.04057	3.70027	82.2738	16.0112	15.0283	43.2143	9.61435	61.3713	30.4316	167.225	20.2874	46.1584	13.1504	131.507
SBULL_11048.mrna1	434	polyhomeotic-like protein 2	1	F:GO:0046872	F:metal ion binding						NP_570018.1 uncharacterized protein Dmel_CG2662, isoform A [Drosophila melanogaster]		136	177	1242	93	179	88	134	333	280	405	461	455	587	77		10.4783	20.6282	20.9655	14.5387	30.5386	9.03757	13.3854	20.2774	19.2935	22.8573	34.3498	34.5674	24.8467	14.874
SBULL_1105.mrna1	275	low-density lipoprotein receptor-related protein 6	1	C:GO:0016021	C:integral component of membrane						NP_524737.2 arrow [Drosophila melanogaster]		68	73	691	6	7	2	13	78	71	55	81	64	98	10		7.85482	14.2531	18.9275	1.37105	1.7801	0.363273	2.29357	8.39279	8.6448	5.48498	10.6648	8.59171	7.32993	3.30598
SBULL_11053.mrna1	161	eukaryotic translation initiation factor 5A	8	F:GO:0003743; F:GO:0003746; C:GO:0005737; P:GO:0006413; P:GO:0006452; F:GO:0043022; P:GO:0045901; P:GO:0045905	F:translation initiation factor activity; F:translation elongation factor activity; C:cytoplasm; P:translational initiation; P:translational frameshifting; F:ribosome binding; P:positive regulation of translational elongation; P:positive regulation of translational termination						NP_726411.1 eukaryotic translation elongation factor 5, isoform B [Drosophila melanogaster]		1903	2297	26698	2730	5308	1722	892	17822	15752	25142	17896	16005	30929	13286		330.104	599.726	1357.68	1074.61	2574.23	375.266	155.837	4276.19	4276.82	5591.16	5254.26	4791.2	5158.57	8976.12
SBULL_1106.mrna1	181	low-density lipoprotein receptor-related protein 6	16	P:GO:0001745; C:GO:0005769; C:GO:0005770; C:GO:0005886; P:GO:0007367; P:GO:0007399; P:GO:0007616; P:GO:0008587; C:GO:0016021; F:GO:0017147; P:GO:0035223; F:GO:0042813; P:GO:0048076; P:GO:0060070; F:GO:0071936; P:GO:0090254	P:compound eye morphogenesis; C:early endosome; C:late endosome; C:plasma membrane; P:segment polarity determination; P:nervous system development; P:long-term memory; P:imaginal disc-derived wing margin morphogenesis; C:integral component of membrane; F:Wnt-protein binding; P:leg disc pattern formation; F:Wnt-activated receptor activity; P:regulation of compound eye pigmentation; P:canonical Wnt…						NP_524737.2 arrow [Drosophila melanogaster]		75	119	515	18	4	3	20	77	76	37	71	55	79	8		13.8315	32.9158	22.4103	5.45814	2.11326	0.653475	3.82684	15.2042	16.9813	6.77135	17.1548	13.5495	10.8433	4.57624
SBULL_11061.mrna1	421	uncharacterized protein LOC111677843									NP_610794.1 uncharacterized protein Dmel_CG8818 [Drosophila melanogaster]		537	178	2007	538	415	568	585	988	790	1138	864	718	1021	406		41.6982	20.791	32.8676	83.1965	68.2878	59.6925	59.4054	62.4351	56.4916	66.6523	66.8098	56.6088	44.8497	81.2589
SBULL_11065.mrna1	572	glycerol-3-phosphate acyltransferase 3 isoform X3	3	P:GO:0008152; C:GO:0016021; F:GO:0016746	P:metabolic process; C:integral component of membrane; F:transferase activity, transferring acyl groups						NP_001286818.1 uncharacterized protein Dmel_CG3209, isoform D [Drosophila melanogaster]		2212	290	4147	307	493	380	422	863	659	906	599	546	1103	552		123.203	24.41	50.0341	34.1777	59.366	28.5724	30.5172	38.1955	33.0044	37.1647	32.4401	30.1496	33.9343	78.2658
SBULL_11071.mrna1	2120	histone-lysine N-methyltransferase trr	4	F:GO:0042800; C:GO:0044666; F:GO:0046872; P:GO:0051568	F:histone methyltransferase activity (H3-K4 specific); C:MLL3/4 complex; F:metal ion binding; P:histone H3-K4 methylation	EC:2.1.1.43	Histone-lysine N-methyltransferase				NP_726773.2 trithorax-related, isoform D [Drosophila melanogaster]		787	185	1543	63	99	123	182	471	422	376	360	451	558	167		10.9143	3.81204	4.77552	1.74401	3.06802	2.2695	3.13487	5.11976	5.1907	3.78806	4.78834	6.11635	4.21623	5.96604
SBULL_11093.mrna1	322	probable GDP-L-fucose synthase	5	P:GO:0033227; P:GO:0042350; F:GO:0050577; F:GO:0050662; P:GO:0055114	P:dsRNA transport; P:GDP-L-fucose biosynthetic process; F:GDP-L-fucose synthase activity; F:coenzyme binding; P:oxidation-reduction process	EC:1.1.1.271	GDP-L-fucose synthase				NP_611734.1 GDP-4-keto-6-deoxy-D-mannose 3,5-epimerase/4-reductase [Drosophila melanogaster]		111	131	699	65	92	102	47	209	183	221	328	310	433	56		11.1133	20.0396	15.1875	13.9203	20.7233	14.4452	6.50222	18.356	18.1873	17.9897	35.2501	33.9689	26.4352	15.3154
SBULL_11098.mrna1	216	protein DPCD									NP_612061.2 uncharacterized protein Dmel_CG13901, isoform A [Drosophila melanogaster]		722	40	252	54	53	22	37	260	156	220	224	208	336	56		135.23	11.0109	10.2722	20.6055	20.8921	5.54478	9.07913	39.1946	26.6111	30.7381	41.3195	39.1205	35.209	25.2051
SBULL_11099.mrna1	211	nuclear receptor-binding factor 2									NP_001163314.1 uncharacterized protein Dmel_CG42554 [Drosophila melanogaster]		87	140	662	81	132	90	129	147	131	193	281	267	461	57		8.14156	27.4327	23.8996	23.2816	41.4765	15.1116	23.5977	22.9351	23.128	27.9088	53.6468	51.9735	49.9972	26.4612
SBULL_11109.mrna1	897	tyrosine-protein phosphatase non-receptor type 4 isoform X1	11	F:GO:0004725; C:GO:0005737; C:GO:0005856; F:GO:0008092; P:GO:0016319; P:GO:0018108; P:GO:0035335; P:GO:0040040; P:GO:0042059; P:GO:0048036; P:GO:0048846	F:protein tyrosine phosphatase activity; C:cytoplasm; C:cytoskeleton; F:cytoskeletal protein binding; P:mushroom body development; P:peptidyl-tyrosine phosphorylation; P:peptidyl-tyrosine dephosphorylation; P:thermosensory behavior; P:negative regulation of epidermal growth factor receptor signaling pathway; P:central complex development; P:axon extension involved in axon guidance	EC:3.1.3.16; EC:3.1.3.48; EC:3.1.3.41	Protein-serine/threonine phosphatase; Protein-tyrosine-phosphatase; 4-nitrophenylphosphatase				NP_728523.2 protein tyrosine phosphatase Meg, isoform H [Drosophila melanogaster]		1264	1151	1990	200	281	405	257	1295	1175	1311	1384	1287	1927	213		42.5445	58.3146	15.0834	13.4736	20.9011	17.5318	11.0486	34.8444	35.7755	32.6939	45.5674	43.2046	36.0419	18.6207
SBULL_11115.mrna1	1050	importin-7	20	C:GO:0005938; P:GO:0006606; P:GO:0007173; P:GO:0007474; P:GO:0008283; F:GO:0008536; P:GO:0008586; C:GO:0015030; P:GO:0016203; P:GO:0016318; P:GO:0030576; F:GO:0030619; F:GO:0030620; F:GO:0030621; P:GO:0035311; P:GO:0042052; P:GO:0042675; P:GO:0043524; P:GO:0045465; C:GO:0048471	C:cell cortex; P:protein import into nucleus; P:epidermal growth factor receptor signaling pathway; P:imaginal disc-derived wing vein specification; P:cell proliferation; F:Ran GTPase binding; P:imaginal disc-derived wing vein morphogenesis; C:Cajal body; P:muscle attachment; P:ommatidial rotation; P:Cajal body organization; F:U1 snRNA binding; F:U2 snRNA binding; F:U4 snRNA binding; P:wing cell …						NP_524780.1 moleskin [Drosophila melanogaster]		287	512	9146	174	797	160	196	1421	1353	1322	2177	1884	2615	2039		9.83042	26.5485	70.6053	11.8512	59.5891	8.16936	8.50245	45.429	48.1936	40.3366	85.3289	77.8768	59.2892	187.199
SBULL_11121.mrna1	243	peroxisomal membrane protein PMP34	1	C:GO:0016021	C:integral component of membrane						NP_728982.1 peroxisomal membrane protein 34, isoform A [Drosophila melanogaster]		172	119	652	75	159	71	42	168	190	214	251	248	487	29		27.1323	27.6108	21.2935	23.3189	53.4203	14.7831	8.74989	23.5847	28.9961	27.0579	45.2388	43.5809	46.8788	11.9821
SBULL_11123.mrna1	466	apyrase	3	F:GO:0005509; C:GO:0016021; F:GO:0017110	F:calcium ion binding; C:integral component of membrane; F:nucleoside-diphosphatase activity	EC:3.6.1.6	Nucleoside diphosphate phosphatase				NP_650074.1 uncharacterized protein Dmel_CG5276, isoform A [Drosophila melanogaster]		93	41	717	64	281	84	71	211	183	283	279	259	405	154		4.43518	2.79231	10.7773	5.90404	34.6048	6.50891	5.00639	11.8261	11.6063	14.7009	19.1345	18.1111	15.7788	27.4733
SBULL_11136.mrna1	1056	chromodomain Y-like protein	4	F:GO:0003824; F:GO:0005515; P:GO:0008152; F:GO:0043035	F:catalytic activity; F:protein binding; P:metabolic process; F:chromatin insulator sequence binding						NP_001262126.1 HP1 and insulator partner protein 1, isoform B [Drosophila melanogaster]		269	5008	2659	122	296	370	621	657	739	772	1002	1045	1214	417		7.82269	218.433	17.0803	7.11436	18.9741	14.3751	23.3248	14.8328	18.8794	16.1538	27.6809	29.4349	19.0519	30.6823
SBULL_11137.mrna1	570	coiled-coil domain-containing protein 22 homolog	5	F:GO:0003674; C:GO:0005575; P:GO:0008150; F:GO:0097602; P:GO:2000060	F:molecular_function; C:cellular_component; P:biological_process; F:cullin family protein binding; P:positive regulation of ubiquitin-dependent protein catabolic process						NP_648929.1 uncharacterized protein Dmel_CG9951 [Drosophila melanogaster]		0	1	2	2	0	1	2	0	0	0	0	0	0	1		3.75502	7.77025	6.48134	1.60127	4.00665	2.05437	3.60879	2.97716	2.61467	3.83012	5.38292	5.32215	4.23166	3.13701
SBULL_11149.mrna1	555	lariat debranching enzyme	2	P:GO:0006397; F:GO:0016788	P:mRNA processing; F:hydrolase activity, acting on ester bonds						NP_996022.1 lariat debranching enzyme [Drosophila melanogaster]		99	304	877	19	68	65	62	153	134	131	199	173	258	48		5.6866	26.3964	11.0261	2.12173	8.64322	5.09647	4.70577	7.00802	6.94534	5.5613	11.1535	9.88639	8.21459	7.04844
SBULL_11153.mrna1	42	---NA---											0	0	1	0	0	0	0	0	0	0	0	0	0	0		0	0	0	0	0	0	0	0	0	0	0	0	0	0
SBULL_11155.mrna1	827	SUMO-activating enzyme subunit 2	11	F:GO:0005524; C:GO:0005737; P:GO:0006959; F:GO:0016881; P:GO:0016925; F:GO:0019948; C:GO:0031510; F:GO:0033134; P:GO:0034126; F:GO:0046872; P:GO:0051092	F:ATP binding; C:cytoplasm; P:humoral immune response; F:acid-amino acid ligase activity; P:protein sumoylation; F:SUMO activating enzyme activity; C:SUMO activating enzyme complex; F:ubiquitin activating enzyme binding; P:positive regulation of MyD88-dependent toll-like receptor signaling pathway; F:metal ion binding; P:positive regulation of NF-kappaB transcription factor activity						NP_524756.2 ubiquitin activating enzyme 2 [Drosophila melanogaster]		750	1535	6974	262	828	570	623	1608	1419	1773	3094	2883	3381	605		28.2248	86.6105	57.0639	19.7151	68.5104	28.7321	30.4247	47.2568	47.1895	48.2934	111.264	105.709	69.0694	57.4754
SBULL_11166.mrna1	128	---NA---											0	0	4	0	0	0	0	0	0	1	0	0	0	0		0	0	0.375707	0	0	0	0	0	0	0.344422	0	0	0	0
SBULL_11174.mrna1	163	ATP-binding cassette sub-family A member 3 isoform X1	3	F:GO:0000166; C:GO:0016020; F:GO:0016887	F:nucleotide binding; C:membrane; F:ATPase activity	EC:3.6.1.3; EC:3.6.1.15	Adenosinetriphosphatase; Nucleoside-triphosphate phosphatase				NP_001259765.1 uncharacterized protein Dmel_CG1718, isoform D [Drosophila melanogaster]		8	12	76	15	7	17	14	7	7	15	28	10	28	9		2.28676	5.17496	4.35597	7.04213	4.34557	6.168	5.27792	1.6442	1.86054	3.48319	8.04765	2.93052	4.57169	5.98113
SBULL_11176.mrna1	97	hypothetical protein FF38_11132	3	C:GO:0005576; P:GO:0006030; F:GO:0008061	C:extracellular region; P:chitin metabolic process; F:chitin binding						NP_649179.2 obstructor-J [Drosophila melanogaster]		3	1	51	7	1	0	0	4	5	9	9	8	33	8		2.46754	0	7.51651	12.4375	1.7333	0	0	2.91658	4.12542	6.08214	8.02991	7.27765	16.7259	12.8857
SBULL_11178.mrna1	255	tuberin	25	P:GO:0001934; F:GO:0005096; C:GO:0005634; P:GO:0007584; P:GO:0008285; P:GO:0008340; P:GO:0010508; F:GO:0019900; P:GO:0030308; C:GO:0033596; P:GO:0035069; P:GO:0042632; P:GO:0043547; P:GO:0045792; P:GO:0045886; P:GO:0046621; P:GO:0046627; P:GO:0048477; P:GO:0051056; P:GO:0051726; P:GO:0071456; P:GO:1902350; P:GO:1904262; P:GO:1904515; P:GO:2000331	P:positive regulation of protein phosphorylation; F:GTPase activator activity; C:nucleus; P:response to nutrient; P:negative regulation of cell proliferation; P:determination of adult lifespan; P:positive regulation of autophagy; F:kinase binding; P:negative regulation of cell growth; C:TSC1-TSC2 complex; P:larval midgut histolysis; P:cholesterol homeostasis; P:positive regulation of GTPase activ…						NP_524177.1 gigas, isoform A [Drosophila melanogaster]		29	11	302	8	8	5	25	110	81	74	120	92	153	16		4.1912	2.47638	9.26808	2.4278	2.62117	1.00432	4.88073	13.1232	10.935	8.18241	17.518	13.6938	12.6883	5.81899
SBULL_11183.mrna1	505	Serine/threonine-protein kinase N	3	F:GO:0005488; P:GO:0009987; F:GO:0016301	F:binding; P:cellular process; F:kinase activity						NP_001286245.1 uncharacterized protein Dmel_CG34141, isoform E [Drosophila melanogaster]		81	29	795	77	53	93	89	271	219	501	26	28	69	354		5.15392	2.74206	11.416	10.1064	7.17519	7.85476	7.35224	14.2927	12.8809	24.6014	1.62399	1.84689	2.62573	57.7178
SBULL_11189.mrna1	439	probable peroxisomal acyl-coenzyme A oxidase 1	8	F:GO:0003995; F:GO:0003997; C:GO:0005777; P:GO:0006091; P:GO:0006693; P:GO:0033539; P:GO:0033540; F:GO:0071949	F:acyl-CoA dehydrogenase activity; F:acyl-CoA oxidase activity; C:peroxisome; P:generation of precursor metabolites and energy; P:prostaglandin metabolic process; P:fatty acid beta-oxidation using acyl-CoA dehydrogenase; P:fatty acid beta-oxidation using acyl-CoA oxidase; F:FAD binding	EC:1.3.99.3; EC:1.3.3.6	Acting on the CH-CH group of donors; Acyl-CoA oxidase				NP_611264.2 uncharacterized protein Dmel_CG5009 [Drosophila melanogaster]		126	355	5213	244	396	294	449	437	310	585	133	159	261	184		9.73538	41.0902	89.0666	37.6693	66.8966	30.1618	44.7252	29.4623	24.4258	37.3933	11.1833	13.653	12.5387	35.8779
SBULL_11193.mrna1	423	alpha-tocopherol transfer protein isoform X2									NP_609968.3 uncharacterized protein Dmel_CG10026, isoform B [Drosophila melanogaster]		254	907	233	360	326	272	472	386	491	672	615	916	1483	46		21.214	113.716	4.18287	66.444	67.0317	30.2162	52.3259	30.0362	42.8766	47.0576	57.2065	86.7083	80.0649	9.75427
SBULL_11201.mrna1	314	tektin-4	7	C:GO:0005634; C:GO:0005875; F:GO:0008017; P:GO:0030317; C:GO:0036126; P:GO:0060271; P:GO:0060294	C:nucleus; C:microtubule associated complex; F:microtubule binding; P:flagellated sperm motility; C:sperm flagellum; P:cilium assembly; P:cilium movement involved in cell motility						NP_523577.1 tektin A, isoform A [Drosophila melanogaster]		5608	0	10	287	0	4	0	1014	569	420	2	57	205	0		643.011	0	0.252273	66.5035	0	0.61466	0	91.954	58.3888	35.3007	0.221931	6.44904	12.9226	0
SBULL_11205.mrna1	591	folylpolyglutamate synthase, mitochondrial	4	F:GO:0004326; F:GO:0005524; P:GO:0006730; P:GO:0046901	F:tetrahydrofolylpolyglutamate synthase activity; F:ATP binding; P:one-carbon metabolic process; P:tetrahydrofolylpolyglutamate biosynthetic process	EC:6.3.2.17	Tetrahydrofolate synthase				NP_001285161.1 uncharacterized protein Dmel_CG2543, isoform B [Drosophila melanogaster]		581	1574	3104	530	1292	689	645	250	213	434	307	350	605	311		31.7437	128.977	36.6259	58.0919	155.249	50.2668	45.6098	10.6627	10.28	17.1561	16.0222	18.6245	17.9369	42.4817
SBULL_11207.mrna1	212	vesicle-trafficking protein SEC22b-B	10	C:GO:0000139; F:GO:0005484; C:GO:0005783; P:GO:0006888; P:GO:0006890; P:GO:0006906; C:GO:0012507; C:GO:0016021; C:GO:0031201; P:GO:0061355	C:Golgi membrane; F:SNAP receptor activity; C:endoplasmic reticulum; P:ER to Golgi vesicle-mediated transport; P:retrograde vesicle-mediated transport, Golgi to ER; P:vesicle fusion; C:ER to Golgi transport vesicle membrane; C:integral component of membrane; C:SNARE complex; P:Wnt protein secretion						NP_569863.1 secretory 22, isoform A [Drosophila melanogaster]		455	1667	1394	199	306	516	266	562	518	552	490	436	792	137		87.2277	479.18	57.479	77.602	126.974	133.281	66.7859	95.7511	101.162	87.5963	103.704	95.106	96.1765	64.1252
SBULL_1121.mrna1	223	uncharacterized protein LOC111689830	1	C:GO:0016021	C:integral component of membrane						NP_001246539.1 uncharacterized protein Dmel_CG12502, isoform C [Drosophila melanogaster]		0	1	3	2	0	0	2	5	2	3	2	3	2	6		0	0.270015	0.117969	0.364734	0	0	0.234566	0.719693	0.325756	0.533628	0.352259	0.538749	0.300166	2.5901
SBULL_1122.mrna1	83	---NA---											0	0	1	1	0	0	0	0	0	0	0	3	0	1		0	0	0.249228	0	0	0	0	0	3.91989	2.14042	0	7.20319	0	2.26461
SBULL_11221.mrna1	1691	AT-rich interactive domain-containing protein 1A isoform X1	5	P:GO:0009653; F:GO:0043565; C:GO:0044446; P:GO:0048522; P:GO:0048731	P:anatomical structure morphogenesis; F:sequence-specific DNA binding; C:intracellular organelle part; P:positive regulation of cellular process; P:system development						NP_001245769.1 zelda, isoform D [Drosophila melanogaster]		15	90594	11298	17	102	25	345	72	49	38	322	424	288	171		0.266185	2377.21	44.0049	0.604322	3.64023	0.592461	7.8315	0.989514	0.762027	0.484032	5.41502	7.27014	2.75134	7.70777
SBULL_11242.mrna1	117	lysozyme 1-like	2	F:GO:0003796; C:GO:0016021	F:lysozyme activity; C:integral component of membrane	EC:3.2.1.17	Lysozyme				NP_476823.1 lysozyme D [Drosophila melanogaster]		0	15	0	4	13	0	0	2	0	0	3	1	0	1		0	11.93	0	4.40273	15.7265	0	0	0.906447	0	0	1.66375	0.565458	0	1.12958
SBULL_11245.mrna1	140	lysozyme 1-like	3	F:GO:0003796; P:GO:0008152; C:GO:0016021	F:lysozyme activity; P:metabolic process; C:integral component of membrane	EC:3.2.1.17	Lysozyme				NP_476823.1 lysozyme D [Drosophila melanogaster]		0	1	0	2	7	0	0	0	0	2	1	0	0	2		0	0	0	1.53108	4.79798	0	0	0	0	0.574525	0.379256	0	0	1.67481
SBULL_11250.mrna1	2611	serine/arginine repetitive matrix protein 2	4	P:GO:0006810; C:GO:0012505; C:GO:0043231; C:GO:0044444	P:transport; C:endomembrane system; C:intracellular membrane-bounded organelle; C:cytoplasmic part						NP_001096963.1 secretory 16, isoform E [Drosophila melanogaster]		5918	8951	11295	1301	1221	1624	3033	5066	5124	5275	2122	2219	3149	850		66.5272	151.074	28.0386	28.9723	30.3552	24.3332	43.6767	44.4348	50.8571	42.8826	22.775	24.283	19.1996	24.3379
SBULL_1126.mrna1	120	endoplasmic reticulum-Golgi intermediate compartment protein 3	1	C:GO:0016021	C:integral component of membrane						NP_648758.1 uncharacterized protein Dmel_CG7011 [Drosophila melanogaster]		0	5	118	2	10	3	1	40	23	46	47	33	53	3		0	2.26148	11.7802	0	2.13398	0.675857	0	27.8064	23.2358	29.3402	46.0647	30.9561	27.3578	5.40311
SBULL_11269.mrna1	400	box C/D snoRNA protein 1	1	F:GO:0046872	F:metal ion binding						NP_572813.2 uncharacterized protein Dmel_CG1463, isoform A [Drosophila melanogaster]		16	25	722	10	31	15	14	83	49	75	38	38	75	102		2.30844	5.64958	17.6188	2.41257	8.26512	4.00612	3.32796	8.86922	8.59161	9.77714	7.64626	6.62257	7.23945	27.8005
SBULL_11273.mrna1	143	lysozyme 1-like	2	F:GO:0003796; C:GO:0016021	F:lysozyme activity; C:integral component of membrane	EC:3.2.1.17	Lysozyme				NP_476823.1 lysozyme D [Drosophila melanogaster]		0	7	0	19	147	0	0	0	0	1	1	1	0	5		0	1.07682	0	9.57188	88.6304	0	0	0	0	0.275779	0.364095	0.371235	0	4.04983
SBULL_11279.mrna1	143	lysozyme 1-like	2	F:GO:0003796; C:GO:0016021	F:lysozyme activity; C:integral component of membrane	EC:3.2.1.17	Lysozyme				NP_476823.1 lysozyme D [Drosophila melanogaster]		0	4	0	7	66	0	1	2	0	0	0	2	0	4		0	1.61523	0	3.68149	41.6178	0	0	0.595101	0	0	0	1.1137	0.206834	2.4299
SBULL_11283.mrna1	90	---NA---											0	0	0	0	0	0	0	11	18	15	22	18	19	0		0	0	0	0	0	0	0	9.93378	18.3941	12.5549	24.3108	20.2807	11.9272	0
SBULL_11284.mrna1	205	testis-expressed sequence 2 protein isoform X2	6	F:GO:0003730; P:GO:0006417; P:GO:0006869; F:GO:0008289; C:GO:0016021; F:GO:0045182	F:mRNA 3'-UTR binding; P:regulation of translation; P:lipid transport; F:lipid binding; C:integral component of membrane; F:translation regulator activity						NP_001261603.1 uncharacterized protein Dmel_CG43783, isoform A [Drosophila melanogaster]		296	2158	1094	62	34	75	77	124	122	120	180	190	278	15		49.6851	589.397	43.3682	21.3955	14.5452	19.2799	19.0476	20.1941	22.4827	18.1128	35.8699	38.6051	31.471	7.23623
SBULL_11286.mrna1	92	putative RNA-binding protein orb2	6	F:GO:0003730; P:GO:0006417; P:GO:0006869; F:GO:0008289; C:GO:0016021; F:GO:0045182	F:mRNA 3'-UTR binding; P:regulation of translation; P:lipid transport; F:lipid binding; C:integral component of membrane; F:translation regulator activity						NP_001261607.1 uncharacterized protein Dmel_CG43783, isoform E [Drosophila melanogaster]		20	200	232	7	5	5	5	35	28	28	40	60	79	4		17.2584	230.701	34.9341	10.4939	10.0274	6.63001	5.35453	29.6434	26.835	21.9795	41.4547	63.4013	46.5102	7.19398
SBULL_1129.mrna1	201	protein mab-21	1	C:GO:0005634	C:nucleus						NP_651971.2 mab-21 [Drosophila melanogaster]		2	12	142	28	12	53	80	87	127	107	299	251	304	4		0.415557	3.75493	6.04658	11.4347	5.4394	13.9707	21.7828	17.7821	28.4742	19.9016	73.6928	61.5334	42.6795	2.47676
SBULL_11290.mrna1	446	uncharacterized protein LOC111690795									NP_648835.1 uncharacterized protein Dmel_CG13074 [Drosophila melanogaster]		101	0	14	3	3	1	2	33	24	26	20	25	40	0		7.22492	0	0.232361	0.454649	0.496344	0.100717	0.195135	1.94745	1.60268	1.42209	1.44423	1.84068	1.64087	0
SBULL_11294.mrna1	224	lipoyltransferase 1, mitochondrial	3	P:GO:0009249; F:GO:0016979; F:GO:0017118	P:protein lipoylation; F:lipoate-protein ligase activity; F:lipoyltransferase activity						NP_611097.2 uncharacterized protein Dmel_CG44243, isoform B [Drosophila melanogaster]		356	875	2896	570	709	721	749	2062	2175	3038	1820	2071	3419	848		62.9415	233.995	103.883	205.508	271.973	172.214	173.425	294.898	351.988	402.692	318.5	369.532	339.895	363.942
SBULL_11295.mrna1	120	lipoyltransferase 1, mitochondrial	3	P:GO:0009249; F:GO:0016979; F:GO:0017118	P:protein lipoylation; F:lipoate-protein ligase activity; F:lipoyltransferase activity						NP_611097.2 uncharacterized protein Dmel_CG44243, isoform B [Drosophila melanogaster]		98	224	1556	269	265	188	136	1195	1298	1563	1157	1273	2313	355		44.7509	153.027	138.179	207.205	263.547	118.275	88.0968	511.209	628.334	619.713	605.646	679.434	687.81	381.46
SBULL_11296.mrna1	79	28S ribosomal protein S36, mitochondrial isoform X1									NP_001137676.1 uncharacterized protein Dmel_CG44242, isoform A [Drosophila melanogaster]		3671	553	546	1252	787	1738	1385	487	308	499	314	269	507	99		5871.51	1396.88	124.247	4392.47	2418.92	4012.99	3386.79	657.807	470.766	624.7	518.984	453.325	476.036	252.571
SBULL_11300.mrna1	340	actin-binding LIM protein 3 isoform X1	3	F:GO:0003779; P:GO:0007010; F:GO:0046872	F:actin binding; P:cytoskeleton organization; F:metal ion binding						NP_001163575.2 uncoordinated 115a, isoform J [Drosophila melanogaster]		463	116	1167	340	372	296	333	493	579	887	224	189	310	300		41.9923	14.8355	25.6067	62.956	67.5238	28.1277	29.579	40.4333	53.7348	67.4243	22.4799	19.3393	17.6732	76.1526
SBULL_11307.mrna1	130	extensin-2 isoform X2	1	P:GO:0007304	P:chorion-containing eggshell formation						NP_001033837.1 chorion protein a at 7F [Drosophila melanogaster]		0	0	138	0	1	13	1	0	0	5	0	0	46	0		0	0	10.6809	0	0.914185	7.47659	0.566008	0	0	2.33383	0	0	14.2531	0
SBULL_11308.mrna1	173	chemosensory protein B 42c	2	C:GO:0016021; P:GO:0043695	C:integral component of membrane; P:detection of pheromone						NP_995764.2 chemosensory protein B 42c [Drosophila melanogaster]		0	0	0	2	12	6	23	0	0	0	0	0	0	0		0	0	0	1.06554	7.35506	2.45337	7.53167	0	0	0	0	0	0	0
SBULL_11310.mrna1	315	tRNA (guanine-N(7)-)-methyltransferase non-catalytic subunit wuho	7	C:GO:0001673; C:GO:0001674; P:GO:0007283; F:GO:0016740; P:GO:0030488; P:GO:0036265; P:GO:0048477	C:male germ cell nucleus; C:female germ cell nucleus; P:spermatogenesis; F:transferase activity; P:tRNA methylation; P:RNA (guanine-N7)-methylation; P:oogenesis						NP_572307.1 wuho [Drosophila melanogaster]		28	44	1055	41	161	60	73	255	292	369	283	365	522	221		2.85516	7.37993	25.1534	9.23178	39.3287	9.03027	10.0998	23.0309	29.8427	30.8886	31.276	41.1293	32.772	62.049
SBULL_11312.mrna1	88	acetyl-CoA acetyltransferase, mitochondrial	2	P:GO:0008152; F:GO:0016747	P:metabolic process; F:transferase activity, transferring acyl groups other than amino-acyl groups						NP_572414.1 uncharacterized protein Dmel_CG10932, isoform A [Drosophila melanogaster]		129	226	1135	85	120	106	102	670	594	716	454	313	464	284		140.358	380.767	221.819	203.716	261.465	161.383	159.414	646.825	652.185	642.447	538.681	377.002	311.381	554.735
SBULL_11314.mrna1	118	uncharacterized protein LOC111687690 isoform X2									NP_001261765.1 uncharacterized protein Dmel_CG10660, isoform D [Drosophila melanogaster]		11	6	294	33	49	14	7	124	118	184	110	127	169	15		5.66438	4.68599	26.9788	31.3237	48.5713	9.80548	4.84539	55.1102	59.344	75.7929	59.8215	70.4209	52.2106	16.6918
SBULL_11316.mrna1	135	sodium- and chloride-dependent neutral and basic amino acid transporter B(0+)-like	4	F:GO:0005328; P:GO:0006836; C:GO:0016021; P:GO:0055085	F:neurotransmitter:sodium symporter activity; P:neurotransmitter transport; C:integral component of membrane; P:transmembrane transport						NP_609137.2 uncharacterized protein Dmel_CG13794 [Drosophila melanogaster]		35	138	3	118	128	19	171	39	18	24	34	22	49	6		20.1587	87.2839	0.255868	100.017	104.931	13.9161	94.6886	17.3169	7.91355	9.87684	17.1148	10.8026	14.3523	5.32478
SBULL_11319.mrna1	411	LIM domain-containing protein jub	1	F:GO:0046872	F:metal ion binding						NP_001285232.1 ajuba LIM protein, isoform E [Drosophila melanogaster]		0	0	0	0	0	0	0	0	0	0	0	0	0	0		2.73254	19.025	5.05605	1.33485	6.55034	3.10362	3.43723	8.45468	7.35933	7.95662	13.2104	12.4146	8.54432	3.70292
SBULL_11323.mrna1	351	uncharacterized protein LOC111686395	4	F:GO:0004842; P:GO:0016567; C:GO:0019005; P:GO:0031146	F:ubiquitin-protein transferase activity; P:protein ubiquitination; C:SCF ubiquitin ligase complex; P:SCF-dependent proteasomal ubiquitin-dependent protein catabolic process						NP_648962.1 uncharacterized protein Dmel_CG7707 [Drosophila melanogaster]		1330	3	5	100	1	1	0	532	208	201	4	13	144	0		129.483	0.450627	0.110091	19.9779	0.219493	0.133929	0	41.9357	18.5533	14.6848	0.385822	1.27851	7.89036	0
SBULL_11328.mrna1	349	UTP--glucose-1-phosphate uridylyltransferase isoform X3	3	F:GO:0003983; P:GO:0006011; P:GO:0055093	F:UTP:glucose-1-phosphate uridylyltransferase activity; P:UDP-glucose metabolic process; P:response to hyperoxia	EC:2.7.7.64; EC:2.7.7.9	UTP-monosaccharide-1-phosphate uridylyltransferase; UTP--glucose-1-phosphate uridylyltransferase				NP_729469.2 UGP, isoform C [Drosophila melanogaster]		684	1070	8129	3673	2688	2446	3791	584	578	1035	365	402	753	519		67.76	159.274	174.106	724.056	552.089	322.868	488	48.4264	53.6305	79.8332	37.3997	41.0054	43.4852	129.044
SBULL_1133.mrna1	69	hyphally regulated cell wall protein 3	1	C:GO:0016020	C:membrane						NP_573102.1 defective proboscis extension response 18 [Drosophila melanogaster]		0	0	3	0	0	0	0	1	1	4	0	0	0	0		0	0	0.899186	0	0	0	0	2.12504	2.40465	7.8782	0	0	0	0
SBULL_11333.mrna1	103	dymeclin	3	C:GO:0005794; P:GO:0007030; C:GO:0016021	C:Golgi apparatus; P:Golgi organization; C:integral component of membrane						NP_610431.1 uncharacterized protein Dmel_CG8230 [Drosophila melanogaster]		467	175	140	54	22	36	32	100	59	89	52	63	100	6		322.506	185.166	16.3111	78.0195	25.3387	33.6837	29.7475	82.505	48.4354	59.2198	47.8216	58.8207	51.3142	8.57793
SBULL_11337.mrna1	50	---NA---											0	0	0	0	0	0	0	6	7	10	2	2	5	0		0	0	0	0	0	0	0	41.6906	55.0389	64.4003	17.0048	17.3382	24.1501	0
SBULL_11338.mrna1	44	---NA---											4	2	39	2	3	3	5	33	28	47	15	11	34	8		802.15	905.891	67.7386	895.142	1153.42	0	2392.96	379.819	364.674	501.373	211.256	157.958	272.022	188.431
SBULL_11340.mrna1	99	vitelline membrane protein Vm26Ab-like	3	F:GO:0003674; C:GO:0005575; P:GO:0008150	F:molecular_function; C:cellular_component; P:biological_process						NP_611763.2 uncharacterized protein Dmel_CG13545 [Drosophila melanogaster]		52	0	4	1	0	0	0	2	2	2	0	0	4	5		38.1344	0	0.477835	1.674	0	0	0	1.37894	1.56038	1.27805	0	0	1.91707	7.72841
SBULL_11342.mrna1	997	activated CDC42 kinase 1	3	F:GO:0004713; F:GO:0005524; P:GO:0018108	F:protein tyrosine kinase activity; F:ATP binding; P:peptidyl-tyrosine phosphorylation	EC:2.7.10	Transferring phosphorus-containing groups				NP_647859.1 activated Cdc42 kinase [Drosophila melanogaster]		828	3442	2209	293	274	363	836	562	561	500	466	468	623	87		25.5361	157.475	14.9773	18.1052	18.67	14.7461	33.3863	13.4939	15.2422	11.1268	13.6912	14.0195	10.398	6.80094
SBULL_1135.mrna1	87	glutathione synthetase isoform X3	8	F:GO:0000287; F:GO:0004363; F:GO:0005524; P:GO:0006750; F:GO:0042803; F:GO:0043295; P:GO:0045471; P:GO:0071722	F:magnesium ion binding; F:glutathione synthase activity; F:ATP binding; P:glutathione biosynthetic process; F:protein homodimerization activity; F:glutathione binding; P:response to ethanol; P:detoxification of arsenic-containing substance	EC:6.3.2.3	Glutathione synthase				NP_001285395.1 uncharacterized protein Dmel_CG32495, isoform I [Drosophila melanogaster]		200	34	404	28	19	24	14	234	140	201	142	185	294	21		201.076	45.9988	65.7535	61.5109	35.6846	38.4151	22.8364	233.809	158.292	186.141	173.616	230.625	204.2	42.6811
SBULL_11352.mrna1	380	odorant receptor 45a-like	2	C:GO:0016020; P:GO:0050896	C:membrane; P:response to stimulus						NP_523666.3 odorant receptor 45a [Drosophila melanogaster]		0	1	0	0	0	0	0	0	0	0	0	0	0	0		0	0.136488	0	0	0	0	0	0	0	0	0	0	0	0
SBULL_11356.mrna1	191	serine-rich adhesin for platelets	9	F:GO:0004725; F:GO:0008138; P:GO:0008285; F:GO:0016314; P:GO:0035335; P:GO:0046855; P:GO:0046856; F:GO:0051717; F:GO:0051800	F:protein tyrosine phosphatase activity; F:protein tyrosine/serine/threonine phosphatase activity; P:negative regulation of cell proliferation; F:phosphatidylinositol-3,4,5-trisphosphate 3-phosphatase activity; P:peptidyl-tyrosine dephosphorylation; P:inositol phosphate dephosphorylation; P:phosphatidylinositol dephosphorylation; F:inositol-1,3,4,5-tetrakisphosphate 3-phosphatase activity; F:phos…	EC:3.1.3.16; EC:3.1.3.48; EC:3.1.3.67; EC:3.1.3.41	Protein-serine/threonine phosphatase; Protein-tyrosine-phosphatase; Phosphatidylinositol-3,4,5-trisphosphate 3-phosphatase; 4-nitrophenylphosphatase				NP_477424.1 phosphatase and tensin homolog, isoform C [Drosophila melanogaster]		136	125	360	14	15	18	49	181	152	132	131	151	219	16		13.4321	22.2595	15.3656	1.82791	5.85517	1.80737	5.28761	32.8331	31.2005	22.1926	29.0776	34.1742	27.6146	8.49503
SBULL_1136.mrna1	300	Pectin lyase fold	9	P:GO:0000160; F:GO:0003676; F:GO:0005509; F:GO:0005544; C:GO:0005622; P:GO:0006355; C:GO:0016020; C:GO:0016021; F:GO:0016829	P:phosphorelay signal transduction system; F:nucleic acid binding; F:calcium ion binding; F:calcium-dependent phospholipid binding; C:intracellular; P:regulation of transcription, DNA-templated; C:membrane; C:integral component of membrane; F:lyase activity								0	3	3661	0	2	1	0	0	0	0	0	0	8	48		0	0.182211	94.2525	0	0.531598	0.16251	0	0	0	0	0	0	0.533965	14.2722
SBULL_11361.mrna1	105	endocuticle structural glycoprotein ABD-4	2	C:GO:0016021; F:GO:0042302	C:integral component of membrane; F:structural constituent of cuticle						NP_001097285.1 cuticular protein 49Aa [Drosophila melanogaster]		0	0	0	1	0	0	0	361	49	1953	11	5	8	0		0	0	0	1.42639	0	0	0	215.401	32.7218	1085.72	7.94334	3.6814	3.28177	0
SBULL_11364.mrna1	277	ATP synthase mitochondrial F1 complex assembly factor 1	3	F:GO:0005515; C:GO:0005739; P:GO:0033615	F:protein binding; C:mitochondrion; P:mitochondrial proton-transporting ATP synthase complex assembly						NP_650565.2 uncharacterized protein Dmel_CG10340 [Drosophila melanogaster]		570	357	2650	829	1118	1278	881	815	680	1134	614	473	769	902		58.8579	55.9633	69.6942	178.744	244.354	196.443	123.058	86.9945	82.1349	112.188	80.1968	62.9916	57.0588	295.992
SBULL_11367.mrna1	228	ELKS/Rab6-interacting/CAST family member 1									NP_651054.1 uncharacterized protein Dmel_CG5376 [Drosophila melanogaster]		13	5	169	15	36	18	5	144	120	159	51	7	63	72		4.00227	3.66599	12.2849	21.2149	31.5698	21.2681	4.09332	57.4491	52.2274	71.2095	22.8636	6.08894	18.9009	54.9455
SBULL_11372.mrna1	557	T-complex protein 1 subunit alpha	5	F:GO:0005524; C:GO:0005737; P:GO:0006457; P:GO:0030707; F:GO:0051082	F:ATP binding; C:cytoplasm; P:protein folding; P:ovarian follicle cell development; F:unfolded protein binding						NP_732748.1 chaperonin containing TCP1 subunit 1, isoform B [Drosophila melanogaster]		1371	1172	14539	283	995	773	705	3471	2957	3643	6421	5330	6475	3167		79.5828	102.354	181.25	33.2228	123.987	60.2073	53.292	158.336	152.637	154.022	358.411	303.346	205.317	462.916
SBULL_11378.mrna1	539	synaptic vesicle glycoprotein 2B	2	C:GO:0016021; P:GO:0055085	C:integral component of membrane; P:transmembrane transport						NP_733086.2 uncharacterized protein Dmel_CG31106 [Drosophila melanogaster]		281	793	2407	90	102	161	46	209	202	370	191	211	382	6		17.026	72.0266	31.6827	10.8445	13.598	13.0478	3.60903	9.89827	10.8255	16.2411	11.0688	12.4676	12.5759	0.909992
SBULL_11387.mrna1	162	probable prefoldin subunit 5	3	P:GO:0006457; C:GO:0016272; F:GO:0051082	P:protein folding; C:prefoldin complex; F:unfolded protein binding						NP_651053.1 prefoldin 5, isoform A [Drosophila melanogaster]		526	165	2559	191	270	217	110	857	677	1178	807	859	1522	423		119.521	54.0121	142.891	82.4077	109.706	63.8601	32.3721	242.133	214.09	306.483	286.118	303.575	296.032	301.097
SBULL_1139.mrna1	596	flocculation protein FLO11-like	3	F:GO:0003674; C:GO:0005575; P:GO:0008150	F:molecular_function; C:cellular_component; P:biological_process						NP_727758.1 uncharacterized protein Dmel_CG32603 [Drosophila melanogaster]		34	15	137	6	9	11	10	425	32	14820	16	51	44	149		1.51549	0.812259	1.54172	0.652689	0.714794	0.723769	0.560385	18.0395	1.52979	583.149	0.827124	2.74086	1.29214	20.231
SBULL_11393.mrna1	43	---NA---											0	0	1	0	0	1	1	6	5	4	2	0	11	1		0	0	7.74425	0	0	0	0	75.7864	71.4652	46.8275	30.9118	0	96.5817	0
SBULL_11395.mrna1	94	neuropeptide F isoform X1	7	F:GO:0005102; P:GO:0007186; P:GO:0030537; P:GO:0042221; P:GO:0048512; P:GO:0048583; P:GO:0051704	F:signaling receptor binding; P:G-protein coupled receptor signaling pathway; P:larval behavior; P:response to chemical; P:circadian behavior; P:regulation of response to stimulus; P:multi-organism process						NP_536741.1 neuropeptide F, isoform A [Drosophila melanogaster]		0	0	18	10	12	0	0	2	2	4	0	0	1	12		0	0	1.80073	5.87088	1.88696	0	0	1.59259	1.80214	2.95213	0	0	0.553524	20.6234
SBULL_11397.mrna1	644	lysosome membrane protein 2	1	C:GO:0016021	C:integral component of membrane						NP_650563.2 uncharacterized protein Dmel_CG10345 [Drosophila melanogaster]		1	3	57	18	15	11	0	393	24	543	42	96	128	18		0.049662	0.223563	0.592313	1.79589	1.53073	0.730381	0	15.2194	1.05172	19.4897	1.99026	4.63835	3.4457	2.2459
SBULL_11403.mrna1	173	calexcitin-2	2	F:GO:0003924; F:GO:0005509	F:GTPase activity; F:calcium ion binding	EC:3.6.1.15	Nucleoside-triphosphate phosphatase				NP_524381.1 sarcoplasmic calcium-binding protein 2 [Drosophila melanogaster]		2477	178	575	216	1242	115	22	36	39	58	39	25	107	169		331.66	49.8111	30.4064	87.9072	558.985	15.7717	3.08114	7.65025	9.37827	11.4236	10.1413	6.62828	15.8059	103.052
SBULL_11407.mrna1	424	transmembrane protease serine 9	2	F:GO:0004252; P:GO:0006508	F:serine-type endopeptidase activity; P:proteolysis	EC:3.4.21	Acting on peptide bonds (peptidases)				NP_650562.1 uncharacterized protein Dmel_CG14892 [Drosophila melanogaster]		73	5	171	7	10	6	1	361	2108	138	0	1	2	0		5.74788	0.599374	2.83372	1.12576	1.75453	0.641118	0.103533	22.6205	149.469	8.01449	0	0.0781779	0.087114	0
SBULL_11412.mrna1	120	putative peptidyl-tRNA hydrolase PTRHD1	1	F:GO:0004045	F:aminoacyl-tRNA hydrolase activity	EC:3.1.1.29; EC:3.1.1.1	Aminoacyl-tRNA hydrolase; Carboxylesterase				NP_650561.1 uncharacterized protein Dmel_CG14903 [Drosophila melanogaster]		38	215	389	20	145	48	48	66	46	107	124	128	145	28		15.9114	147.75	29.7158	17.7009	98.1632	24.3308	25.3612	28.2342	22.2676	42.4244	64.9094	68.317	43.1183	30.2574
SBULL_11416.mrna1	170	collagen alpha chain CG42342									NP_001163631.2 uncharacterized protein Dmel_CG42342, isoform Q [Drosophila melanogaster]		0	2	71	3	8	4	5	36	33	62	55	44	59	4		0	0.401914	3.95067	1.63858	3.47682	0.718365	1.05285	7.84968	8.14233	12.5297	14.6746	11.9699	8.9426	2.49395
SBULL_11425.mrna1	411	collagen alpha chain CG42342 isoform X12	2	C:GO:0005581; C:GO:0016021	C:collagen trimer; C:integral component of membrane						NP_001138061.1 uncharacterized protein Dmel_CG42342, isoform D [Drosophila melanogaster]		1	57	967	7	68	13	22	191	161	342	228	172	351	38		0.0828041	7.08776	17.5045	1.168	12.3729	1.44097	2.3631	12.4219	11.8485	20.6149	18.1444	13.9563	15.868	7.61156
SBULL_11428.mrna1	64	---NA---											0	0	4	0	0	0	0	1	4	6	6	7	7	0		0	0	0	0	0	0	0	2.76904	12.5336	15.3986	20.3299	24.1833	13.4738	0
SBULL_11434.mrna1	372	serine protease easter	1	F:GO:0008233	F:peptidase activity						NP_524362.2 easter, isoform A [Drosophila melanogaster]		1	0	0	55	0	44	0	1	0	1	0	2	2	0		0.0932167	0	0	7.89671	0	4.99319	0	0.0733805	0	0.0680114	0	0.183104	0.102017	0
SBULL_11440.mrna1	647	protein TAPT1 homolog	1	C:GO:0016021	C:integral component of membrane						NP_650678.1 uncharacterized protein Dmel_CG7218, isoform A [Drosophila melanogaster]		116	256	893	39	53	59	121	262	246	221	252	287	313	38		5.3854	18.8312	9.38491	3.47402	5.54772	3.83132	7.6063	10.2478	10.9423	7.9983	12.0682	14.3236	8.73028	4.71745
SBULL_11446.mrna1	237	transcription factor grauzone	3	F:GO:0003676; C:GO:0005634; F:GO:0008270	F:nucleic acid binding; C:nucleus; F:zinc ion binding						NP_611944.1 uncharacterized protein Dmel_CG4707 [Drosophila melanogaster]		22	11	147	5	10	5	7	24	19	19	45	21	43	10		2.80618	2.23515	4.96083	1.34055	3.249	1.10816	1.50895	3.69633	3.2864	2.3247	7.59217	3.45876	4.03764	3.99043
SBULL_11451.mrna1	302	chymotrypsin-2-like isoform X2	1	F:GO:0008233	F:peptidase activity						NP_569939.2 uncharacterized protein Dmel_CG3795, isoform A [Drosophila melanogaster]		504	0	0	37	0	0	0	166	87	72	1	9	33	0		60.6761	0	0	9.00676	0	0	0	15.8257	9.38555	6.36193	0.116657	1.0705	2.18691	0
SBULL_11455.mrna1	538	Ca(2+)/calmodulin-responsive adenylate cyclase isoform X1	7	F:GO:0000166; F:GO:0004016; C:GO:0005622; C:GO:0005886; P:GO:0006171; C:GO:0016021; P:GO:0035556	F:nucleotide binding; F:adenylate cyclase activity; C:intracellular; C:plasma membrane; P:cAMP biosynthetic process; C:integral component of membrane; P:intracellular signal transduction	EC:4.6.1.1	Adenylate cyclase				NP_001245672.1 rutabaga, isoform B [Drosophila melanogaster]		136	80	1425	118	163	176	285	342	255	463	354	304	369	87		8.07548	7.29072	18.1729	14.1643	20.3061	14.0498	22.1716	16.2316	13.695	20.3666	20.5586	18.001	12.1738	13.07
SBULL_11456.mrna1	488	Ca(2+)/calmodulin-responsive adenylate cyclase isoform X1	7	F:GO:0000166; F:GO:0004016; C:GO:0005622; C:GO:0005886; P:GO:0006171; C:GO:0016021; P:GO:0035556	F:nucleotide binding; F:adenylate cyclase activity; C:intracellular; C:plasma membrane; P:cAMP biosynthetic process; C:integral component of membrane; P:intracellular signal transduction	EC:4.6.1.1	Adenylate cyclase				NP_001259550.1 rutabaga, isoform E [Drosophila melanogaster]		108	61	953	99	117	94	252	199	186	314	226	189	262	57		7.19126	5.90692	13.546	13.2425	16.8603	8.35042	22.0625	10.5692	11.1786	15.4568	14.6876	12.5239	9.67281	9.65579
SBULL_1146.mrna1	454	skin secretory protein xP2	5	C:GO:0005874; F:GO:0008017; C:GO:0016020; C:GO:0016021; P:GO:0048813	C:microtubule; F:microtubule binding; C:membrane; C:integral component of membrane; P:dendrite morphogenesis						NP_572941.1 uncharacterized protein Dmel_CG11584 [Drosophila melanogaster]		0	0	2552	0	0	0	0	130	300	138	4	12	14	3		0	0	40.5997	0	0	0	0	7.50625	19.6014	7.38516	0.282615	0.864468	0.561914	0.550708
SBULL_11470.mrna1	224	ATP-dependent RNA helicase dbp4	12	P:GO:0000387; F:GO:0003676; F:GO:0004004; F:GO:0005524; C:GO:0005730; P:GO:0007528; P:GO:0007629; P:GO:0010501; C:GO:0015030; F:GO:0016740; C:GO:0032797; C:GO:0071254	P:spliceosomal snRNP assembly; F:nucleic acid binding; F:ATP-dependent RNA helicase activity; F:ATP binding; C:nucleolus; P:neuromuscular junction development; P:flight behavior; P:RNA secondary structure unwinding; C:Cajal body; F:transferase activity; C:SMN complex; C:cytoplasmic U snRNP body	EC:3.6.1.3; EC:3.6.1.15	Adenosinetriphosphatase; Nucleoside-triphosphate phosphatase				NP_524019.1 Gemin3, isoform A [Drosophila melanogaster]		6	95	618	9	17	4	4	99	102	98	137	89	158	30		1.06763	19.8165	20.711	2.89353	5.44396	0.956097	0.930454	14.1284	16.4718	12.9623	23.9239	15.8465	15.6739	12.8504
SBULL_11477.mrna1	665	putative sodium-coupled neutral amino acid transporter 10 isoform X1	1	C:GO:0016021	C:integral component of membrane						NP_611579.1 uncharacterized protein Dmel_CG30394, isoform A [Drosophila melanogaster]		135	71	589	23	63	28	23	164	200	92	107	100	161	22		6.2792	4.96272	6.00336	2.11822	6.22695	1.73022	1.42608	6.87495	9.25936	3.60152	5.30352	5.68721	4.59714	2.65098
SBULL_11482.mrna1	224	paired box protein Pax-6-like											1	5	8	4	2	1	1	8	10	10	16	8	4	1		0.178304	1.34171	0.273582	0.362448	0.779291	0.239519	0.233099	1.14413	1.61834	1.32552	2.8	1.42745	0.397655	0.429176
SBULL_11485.mrna1	159	venom allergen 3-like									NP_727412.2 uncharacterized protein Dmel_CG32679 [Drosophila melanogaster]		51	0	4	1	0	0	0	79	55	22	0	14	20	0		6.84515	0	0.258945	0	0	0	0	19.372	15.2614	5	0	4.28314	3.40909	0
SBULL_11486.mrna1	102	---NA---											227	1	3	9	1	1	2	58	24	22	0	4	11	0		160.587	1.09742	0.297671	13.8629	1.52614	0.987001	1.96991	36.915	17.2851	12.9777	0	3.17631	4.86665	0
SBULL_1149.mrna1	54	---NA---											0	0	0	0	1	0	1	0	1	0	0	0	0	0		0	0	0	0	0	0	0	0	5.85668	0	0	0	0	0
SBULL_11492.mrna1	48	---NA---											3	0	0	2	0	0	0	0	0	1	0	0	1	0		312.703	0	0	936.586	0	0	0	0	0	7.34812	0	0	5.51109	0
SBULL_11493.mrna1	396	venom allergen 5-like									NP_524770.1 antigen 5-related, isoform A [Drosophila melanogaster]		541	1	12	26	0	2	2	36	14	33	0	2	17	0		68.0058	0.12994	0.324157	6.62743	0.190081	0.463341	0.224539	17.8868	9.46599	7.37502	0.166441	1.01823	3.92389	0
SBULL_11498.mrna1	92	---NA---											0	0	2	0	0	0	0	0	0	0	0	0	0	0		0	0	0.189859	0	0	0	0	0	0	0	0	0	0	0
SBULL_11503.mrna1	119	sodium-dependent serotonin transporter	7	F:GO:0005261; F:GO:0005328; F:GO:0008504; C:GO:0016021; C:GO:0043679; P:GO:0051610; P:GO:0098655	F:cation channel activity; F:neurotransmitter:sodium symporter activity; F:monoamine transmembrane transporter activity; C:integral component of membrane; C:axon terminus; P:serotonin uptake; P:cation transmembrane transport						NP_523846.2 serotonin transporter, isoform A [Drosophila melanogaster]		0	0	5	0	0	0	0	2	0	2	0	4	1	7		0	0	0.431484	0	0	0	0	1.30789	0.493328	1.2122	0	2.71962	0.606098	7.67531
SBULL_11505.mrna1	332	protein Smaug isoform X1	5	F:GO:0003723; P:GO:0006355; P:GO:0017148; F:GO:0030371; P:GO:0043488	F:RNA binding; P:regulation of transcription, DNA-templated; P:negative regulation of translation; F:translation repressor activity; P:regulation of mRNA stability						NP_729442.1 smaug, isoform C [Drosophila melanogaster]		16	678	2960	25	50	9	27	58	71	93	43	47	104	4		1.71231	104.52	64.711	5.40322	11.5069	1.29047	3.47746	5.15453	7.0758	7.36186	4.54953	4.95501	6.34373	1.05491
SBULL_11507.mrna1	192	probable tubulin polyglutamylase TTLL1	4	F:GO:0005524; P:GO:0018094; P:GO:0018095; F:GO:0070735	F:ATP binding; P:protein polyglycylation; P:protein polyglutamylation; F:protein-glycine ligase activity						NP_729025.1 uncharacterized protein Dmel_CG32238 [Drosophila melanogaster]		498	4	18	46	8	2	6	167	64	61	5	16	49	1		110.185	1.33864	0.582769	20.4028	3.87384	0.59779	1.74875	31.4886	13.2347	10.5065	1.10088	3.59189	6.50401	0.527152
SBULL_11508.mrna1	52	---NA---											14	0	0	1	0	0	0	39	14	9	0	1	20	1		327.463	0	0	0	0	0	0	233.02	94.6547	49.8394	0	7.45447	83.0656	9.96566
SBULL_11515.mrna1	356	protein brown	4	F:GO:0005524; C:GO:0016021; F:GO:0016887; P:GO:0055085	F:ATP binding; C:integral component of membrane; F:ATPase activity; P:transmembrane transport	EC:3.6.1.3; EC:3.6.1.15	Adenosinetriphosphatase; Nucleoside-triphosphate phosphatase				NP_523824.1 brown, isoform A [Drosophila melanogaster]		53	19	121	11	20	23	6	12	7	32	15	48	29	24		5.20923	2.80535	2.51094	2.18169	4.09987	3.02782	0.765951	0.929493	0.613547	2.29729	1.42171	4.63868	1.56144	5.83003
SBULL_11518.mrna1	92	protein brown	12	F:GO:0005275; F:GO:0005524; C:GO:0005886; P:GO:0006727; P:GO:0006856; P:GO:0007605; P:GO:0015842; P:GO:0015918; C:GO:0016021; F:GO:0017127; F:GO:0034041; P:GO:0055085	F:amine transmembrane transporter activity; F:ATP binding; C:plasma membrane; P:ommochrome biosynthetic process; P:eye pigment precursor transport; P:sensory perception of sound; P:aminergic neurotransmitter loading into synaptic vesicle; P:sterol transport; C:integral component of membrane; F:cholesterol transporter activity; F:sterol-transporting ATPase activity; P:transmembrane transport	EC:3.6.1.3; EC:3.6.1.15	Adenosinetriphosphatase; Nucleoside-triphosphate phosphatase				NP_523824.1 brown, isoform A [Drosophila melanogaster]		4	2	6	1	3	1	1	3	4	4	1	5	5	1		2.8764	0	0.379719	2.09878	6.01645	0	1.33863	2.54086	3.83358	3.13993	1.03637	5.28344	2.94369	1.79849
SBULL_11519.mrna1	206	uncharacterized protein LOC111689814, partial	1	C:GO:0016021	C:integral component of membrane						NP_609639.2 uncharacterized protein Dmel_CG9395, isoform C [Drosophila melanogaster]		0	0	28	5	2	0	2	10	5	4	4	8	7	6		0	0	1.00982	2.04272	0.875483	0	0.52537	1.77843	1.09769	0.899075	1.38483	1.81541	0.786691	2.87572
SBULL_11522.mrna1	93	Semaphorin-1A	1	C:GO:0016021	C:integral component of membrane						NP_001260266.1 semaphorin 1a, isoform H [Drosophila melanogaster]		0	2	0	0	0	0	0	6	8	5	0	6	6	0		0	1.42126	0	0	0	0	0	4.92591	7.43208	5.32641	5.02296	7.17003	4.56549	0
SBULL_1153.mrna1	226	cuticle protein 16.5									NP_572939.1 uncharacterized protein Dmel_CG1368 [Drosophila melanogaster]		2	2	1413	0	1	0	1	875	60	4125	6	22	17	66		0.352264	0.26506	50.0409	0	0.384946	0	0.230218	123.554	9.58707	540.245	1.03671	3.87579	1.66863	28.0004
SBULL_11536.mrna1	307	DNA-directed RNA polymerase II subunit RPB3	7	F:GO:0001055; F:GO:0005488; C:GO:0005665; C:GO:0005703; C:GO:0005737; P:GO:0006366; P:GO:0034605	F:RNA polymerase II activity; F:binding; C:RNA polymerase II, core complex; C:polytene chromosome puff; C:cytoplasm; P:transcription by RNA polymerase II; P:cellular response to heat	EC:2.7.7.6	DNA-directed RNA polymerase				NP_477419.1 RNA polymerase II 33kD subunit [Drosophila melanogaster]		51	130	903	54	110	76	63	154	123	205	227	238	351	61		6.01462	23.0415	23.7375	12.874	28.4482	12.0135	9.66545	20.7217	19.2233	22.7525	36.3207	37.4986	31.6631	18.8219
SBULL_11541.mrna1	123	cuticle protein 64									NP_648865.1 uncharacterized protein Dmel_CG4962 [Drosophila melanogaster]		1	50	5	792	222	222	298	2532	561	15049	8	6	17	8		0.472838	31.5233	0.506054	554.196	163.583	132.918	176.708	1025.27	257.053	5647.84	3.96386	3.03119	4.78504	8.28526
SBULL_11544.mrna1	486	neuropeptide-like 3	1	P:GO:0007218	P:neuropeptide signaling pathway						NP_648870.1 uncharacterized protein Dmel_CG13042 [Drosophila melanogaster]		1	0	5	587	163	893	1264	19	2	57	0	3	2	386		0.068162	0	0.0601532	80.518	24.4348	81.4366	111.63	1.01395	0.120775	2.81928	0	0.199743	0.111287	66.0299
SBULL_1156.mrna1	276	cuticle protein 16.5									NP_572939.1 uncharacterized protein Dmel_CG1368 [Drosophila melanogaster]		0	0	5197	0	0	1	1	318	108	4997	126	659	145	409		0	0	145.404	0	0	0.181068	0.175874	34.1071	13.1077	497.136	16.5365	88.1841	10.8105	134.153
SBULL_11564.mrna1	116	pupal cuticle protein G1A-like									NP_648870.1 uncharacterized protein Dmel_CG13042 [Drosophila melanogaster]		0	0	0	698	409	0	0	0	0	0	0	0	0	1		0	0	0	642.928	296.151	0	0	0	0	0	0	0	0	1.14687
SBULL_11565.mrna1	333	probable cytochrome P450 304a1	6	F:GO:0004497; F:GO:0005506; C:GO:0016021; F:GO:0016705; F:GO:0020037; P:GO:0055114	F:monooxygenase activity; F:iron ion binding; C:integral component of membrane; F:oxidoreductase activity, acting on paired donors, with incorporation or reduction of molecular oxygen; F:heme binding; P:oxidation-reduction process						NP_731751.1 Cyp304a1 [Drosophila melanogaster]		23	3	4	46	41	77	34	564	464	625	517	566	1491	0		2.45237	0.480615	0.0938825	7.53633	8.89101	10.2856	4.43459	47.4784	44.1997	48.7638	53.2552	59.4458	87.2482	0
SBULL_11569.mrna1	172	PREDICTED: uncharacterized protein LOC108363249	2	C:GO:0005634; P:GO:0006915	C:nucleus; P:apoptotic process						NP_726513.1 uncharacterized protein Dmel_CG30428, isoform A [Drosophila melanogaster]		0	0	1	0	0	0	0	0	0	0	0	0	0	0		0	0	0.0572344	0	0	0	0	0	0	0	0	0	0	0
SBULL_11570.mrna1	454	protein single-minded isoform X2	2	F:GO:0005488; C:GO:0044424	F:binding; C:intracellular part						NP_001262527.1 single-minded, isoform C [Drosophila melanogaster]		43	65	383	15	35	71	58	50	63	73	70	73	83	8		3.17014	7.19475	6.1138	2.22656	5.67306	7.0046	5.54277	2.9473	4.11984	3.96358	4.95003	5.55179	3.3744	1.46977
SBULL_11575.mrna1	371	coiled-coil domain-containing protein 40	1	P:GO:0035082	P:axoneme assembly						NP_001104357.1 lethal (2) 41Ab, isoform A [Drosophila melanogaster]		10551	4	10	343	0	8	1	2646	1172	744	4	110	663	0		759.275	0.561881	0.185414	52.062	0	0.751409	0.121417	194.806	97.6392	50.7675	0.360352	10.104	33.9303	0
SBULL_11579.mrna1	745	ubiquitin carboxyl-terminal hydrolase 35	6	F:GO:0005515; P:GO:0006511; P:GO:0016579; F:GO:0036459; P:GO:0043066; P:GO:1903051	F:protein binding; P:ubiquitin-dependent protein catabolic process; P:protein deubiquitination; F:thiol-dependent ubiquitinyl hydrolase activity; P:negative regulation of apoptotic process; P:negative regulation of proteolysis involved in cellular protein catabolic process	EC:3.4.19.12	Ubiquitinyl hydrolase 1				NP_725167.1 deubiquitinating apoptotic inhibitor, isoform B [Drosophila melanogaster]		1468	441	2338	146	137	136	337	756	535	436	428	414	600	74		62.0405	28.0002	21.6946	12.3198	12.6769	7.69302	18.4399	24.9419	19.9841	13.3755	17.2557	17.0596	13.7648	7.88778
SBULL_1158.mrna1	233	signal transducer and activator of transcription C-like									NP_572939.1 uncharacterized protein Dmel_CG1368 [Drosophila melanogaster]		0	1	20	1	0	4	0	3	0	6	2	16	3	7147		0	0.254177	0.740966	0.343091	0	0.907379	0	0.405639	0	0.751918	0.330905	2.69915	0.281969	2913.3
SBULL_11586.mrna1	96	matrix metalloproteinase-2	28	P:GO:0002218; P:GO:0003144; P:GO:0003319; F:GO:0004222; P:GO:0006929; P:GO:0007419; P:GO:0007426; P:GO:0007505; P:GO:0007561; P:GO:0008045; F:GO:0008270; C:GO:0009897; C:GO:0016021; P:GO:0016485; C:GO:0030425; P:GO:0030728; C:GO:0031012; P:GO:0034769; P:GO:0035202; P:GO:0040037; P:GO:0042060; P:GO:0045216; P:GO:0046331; P:GO:0046529; P:GO:0090090; P:GO:0097156; P:GO:1901202; P:GO:2000647	P:activation of innate immune response; P:embryonic heart tube formation; P:cardioblast migration to the midline involved in heart rudiment formation; F:metalloendopeptidase activity; P:substrate-dependent cell migration; P:ventral cord development; P:tracheal outgrowth, open tracheal system; P:adult fat body development; P:imaginal disc eversion; P:motor neuron axon guidance; F:zinc ion binding;…	EC:3.4.24	Acting on peptide bonds (peptidases)				NP_995788.1 matrix metalloproteinase 2, isoform B [Drosophila melanogaster]		30	54	65	11	25	80	26	46	64	53	64	48	86	2		22.8578	62.1116	7.7031	14.6645	44.5416	93.2682	29.2635	34.5205	54.3481	36.8635	58.7698	44.9416	44.8621	3.29043
SBULL_11589.mrna1	51	myocyte-specific enhancer factor 2 isoform X1	4	F:GO:0000977; C:GO:0005634; P:GO:0045944; F:GO:0046983	F:RNA polymerase II regulatory region sequence-specific DNA binding; C:nucleus; P:positive regulation of transcription by RNA polymerase II; F:protein dimerization activity						NP_477018.1 myocyte enhancer factor 2, isoform C [Drosophila melanogaster]		0	14	7	3	1	3	13	9	24	15	29	13	30	0		0	0	5.7505	0	0	0	0	102.994	203.955	125.289	330.822	152.592	174.509	0
SBULL_11590.mrna1	167	PDZ and LIM domain protein Zasp isoform X9	1	F:GO:0046872	F:metal ion binding						NP_001261008.1 Z band alternatively spliced PDZ-motif protein 52, isoform O [Drosophila melanogaster]		6	3	3	805	400	716	1492	81	79	189	55	56	84	1		1.64982	1.24421	0.179717	441.008	228.265	262.075	533.346	18.2567	20.1488	39.4821	15.1689	15.7476	13.1607	0.641515
SBULL_11593.mrna1	183	PDZ and LIM domain protein Zasp isoform X4	1	F:GO:0046872	F:metal ion binding						NP_001303352.1 Z band alternatively spliced PDZ-motif protein 52, isoform Z [Drosophila melanogaster]		145	229	717	4663	1929	6396	8844	289	263	607	217	361	417	795		25.7744	65.8178	31.8963	1889.82	825.821	1821.11	2503.26	56.0723	57.7419	109.154	51.5187	87.3867	56.2404	447.833
SBULL_11597.mrna1	646	proteoglycan 4	10	F:GO:0004843; F:GO:0005044; P:GO:0006898; P:GO:0006955; P:GO:0016579; C:GO:0020003; F:GO:0030247; P:GO:0030433; P:GO:1904153; F:GO:1904265	F:thiol-dependent ubiquitin-specific protease activity; F:scavenger receptor activity; P:receptor-mediated endocytosis; P:immune response; P:protein deubiquitination; C:symbiont-containing vacuole; F:polysaccharide binding; P:ubiquitin-dependent ERAD pathway; P:negative regulation of retrograde protein transport, ER to cytosol; F:ubiquitin-specific protease activity involved in negative regulatio…						NP_727774.2 mucin 12Ea [Drosophila melanogaster]		950	318	457	1848	4116	1194	344	3	0	6	1	2	1	544		47.1163	23.9877	4.97375	184.937	447.735	78.9414	22.0257	0.115777	0	0.250379	0.047223	0.096298	0.0268263	67.8963
SBULL_116.mrna1	289	uncharacterized protein LOC111684331	1	C:GO:0016021	C:integral component of membrane						NP_649627.1 osiris 8 [Drosophila melanogaster]		0	0	20	0	0	0	0	1143	6418	3	82	6	2550	0		0	0	0.55966	0	0	0	0	115.38	733.108	0.280676	10.1287	0.755653	178.931	0
SBULL_11604.mrna1	533	uncharacterized protein LOC111686737											3826	0	5	144	0	1	0	495	232	193	0	7	88	0		213.05	0	0.0406307	16.6602	0	0.0820767	0	23.7458	12.5937	8.58104	0	0.418955	2.93445	0
SBULL_11609.mrna1	379	secretion-regulating guanine nucleotide exchange factor									NP_608602.1 uncharacterized protein Dmel_CG7420, isoform A [Drosophila melanogaster]		25	33	767	46	59	63	61	106	117	128	134	120	137	68		2.27898	4.24451	15.0434	8.45629	11.8128	7.69011	7.21824	7.60324	9.49649	8.50949	11.7612	10.7389	6.83086	15.3571
SBULL_11613.mrna1	56	---NA---											4	3	23	0	1	2	0	7	6	4	11	8	8	4		0	0	7.7833	0	0	0	0	31.5968	30.6465	16.7342	60.7564	45.0529	25.1013	29.3952
SBULL_11621.mrna1	137	ribonuclease UK114	1	P:GO:0006457	P:protein folding						NP_609747.1 UK114, isoform A [Drosophila melanogaster]		6779	3052	1202	875	1077	1678	1418	4643	4984	6275	5174	5314	13115	1005		2350.05	1632.48	76.2028	629.792	475.269	796.801	668.15	1501.51	1823.87	1880.81	2047.44	2144.07	2948.22	863.279
SBULL_11625.mrna1	255	uncharacterized abhydrolase domain-containing protein DDB_G0269086									NP_610486.1 uncharacterized protein Dmel_CG13955 [Drosophila melanogaster]		0	0	3	4	0	1	0	3	2	5	1	2	3	0		0	0	0.0985966	0.910425	0	0.200864	0	0.357907	0.27	0.552865	0.145983	0.297691	0.248789	0
SBULL_11628.mrna1	476	probable 26S proteasome non-ATPase regulatory subunit 3	5	C:GO:0005838; F:GO:0008270; F:GO:0030234; P:GO:0042176; P:GO:0050790	C:proteasome regulatory particle; F:zinc ion binding; F:enzyme regulator activity; P:regulation of protein catabolic process; P:regulation of catalytic activity						NP_477300.1 regulatory particle non-ATPase 3, isoform A [Drosophila melanogaster]		673	607	5723	566	794	778	606	1502	1502	1508	2255	2181	2863	445		46.9807	63.5083	86.7015	79.3835	121.735	72.6668	54.8185	82.1201	92.9254	76.4156	150.862	148.773	108.809	77.5156
SBULL_1163.mrna1	124	hypothetical protein FF38_00861											0	1	53	1	1	3	1	169	856	295	61	67	111	0		0	0.704788	4.18606	0.971279	1.00012	1.89482	0.622776	67.2303	385.333	108.768	29.6936	33.2538	30.6947	0
SBULL_11631.mrna1	92	larval cuticle protein A2B	4	F:GO:0008010; C:GO:0016021; C:GO:0031012; P:GO:0040003	F:structural constituent of chitin-based larval cuticle; C:integral component of membrane; C:extracellular matrix; P:chitin-based cuticle development						NP_649677.1 Ccp84Ag [Drosophila melanogaster]		0	0	281	2	0	0	0	0	0	0	0	0	2	0		0	0	56.3883	2.09878	0	0	0	1.69391	0.958394	0	0	5.28344	1.76621	0
SBULL_11633.mrna1	141	erythroid differentiation-related factor 1									NP_648252.1 uncharacterized protein Dmel_CG6511, isoform A [Drosophila melanogaster]		6	31	303	4	9	8	13	50	37	62	66	73	74	13		2.19183	17.1161	21.2608	3.02216	7.10793	2.96465	5.81954	15.2849	12.7991	17.5665	24.6883	27.8422	15.7249	10.7647
SBULL_11638.mrna1	224	soma ferritin-like	12	F:GO:0004322; C:GO:0005794; P:GO:0006879; C:GO:0008043; F:GO:0008198; F:GO:0008199; P:GO:0009620; P:GO:0042381; P:GO:0045475; P:GO:0055114; P:GO:0098711; P:GO:1990461	F:ferroxidase activity; C:Golgi apparatus; P:cellular iron ion homeostasis; C:intracellular ferritin complex; F:ferrous iron binding; F:ferric iron binding; P:response to fungus; P:hemolymph coagulation; P:locomotor rhythm; P:oxidation-reduction process; P:iron ion import across plasma membrane; P:detoxification of iron ion	EC:1.16.3.1; EC:1.16.3	Ferroxidase; Oxidizing metal ions				NP_733363.1 ferritin 2 light chain homologue, isoform C [Drosophila melanogaster]		8826	7255	24847	7762	16077	7750	12566	7282	6344	10603	7011	9240	17098	2868		1542.69	1915.97	911.027	2665.08	4348.06	1806.21	2866.88	1041.44	1026.67	1405.44	1226.93	1648.71	1699.77	1229.16
SBULL_1164.mrna1	507	Catalase	15	P:GO:0003007; F:GO:0004096; F:GO:0008483; F:GO:0020037; F:GO:0030170; P:GO:0034976; P:GO:0035206; P:GO:0036335; P:GO:0038001; P:GO:0042542; P:GO:0042744; P:GO:0045471; F:GO:0046872; P:GO:0055114; P:GO:0098869	P:heart morphogenesis; F:catalase activity; F:transaminase activity; F:heme binding; F:pyridoxal phosphate binding; P:response to endoplasmic reticulum stress; P:regulation of hemocyte proliferation; P:intestinal stem cell homeostasis; P:paracrine signaling; P:response to hydrogen peroxide; P:hydrogen peroxide catabolic process; P:response to ethanol; F:metal ion binding; P:oxidation-reduction pr…	EC:1.11.1.7; EC:1.11.1.6	Peroxidase; Catalase				NP_536731.1 catalase [Drosophila melanogaster]		2730	5	17	184	8	24	12	703	314	204	0	52	182	2		162.301	0.48745	0.229305	21.6895	1.14289	1.99829	1.00952	35.7213	18.0546	9.60734	0	3.29658	6.42844	0.324657
SBULL_11642.mrna1	206	ferritin subunit	14	F:GO:0004322; F:GO:0005515; C:GO:0005794; P:GO:0006879; C:GO:0008043; F:GO:0008198; F:GO:0008199; P:GO:0008283; P:GO:0009620; P:GO:0009791; C:GO:0045169; P:GO:0055114; P:GO:0098711; P:GO:1990461	F:ferroxidase activity; F:protein binding; C:Golgi apparatus; P:cellular iron ion homeostasis; C:intracellular ferritin complex; F:ferrous iron binding; F:ferric iron binding; P:cell proliferation; P:response to fungus; P:post-embryonic development; C:fusome; P:oxidation-reduction process; P:iron ion import across plasma membrane; P:detoxification of iron ion	EC:1.16.3.1; EC:1.16.3	Ferroxidase; Oxidizing metal ions				NP_733360.1 ferritin 1 heavy chain homologue, isoform D [Drosophila melanogaster]		3025	3348	27213	3817	3714	2582	3861	8680	7736	11839	7060	9551	18250	2607		581.255	943.168	1072.03	1449.11	1502.33	672.777	976.4	1403.34	1415.29	1774.03	1396.7	1926.55	2051.02	1247.1
SBULL_11653.mrna1	302	RNA-binding protein 8A	14	P:GO:0000184; P:GO:0000226; P:GO:0000335; P:GO:0000381; F:GO:0003729; F:GO:0005515; C:GO:0005737; P:GO:0006406; P:GO:0007173; P:GO:0007294; P:GO:0007317; C:GO:0035145; P:GO:0046595; P:GO:0051663	P:nuclear-transcribed mRNA catabolic process, nonsense-mediated decay; P:microtubule cytoskeleton organization; P:negative regulation of transposition, DNA-mediated; P:regulation of alternative mRNA splicing, via spliceosome; F:mRNA binding; F:protein binding; C:cytoplasm; P:mRNA export from nucleus; P:epidermal growth factor receptor signaling pathway; P:germarium-derived oocyte fate determinati…						NP_610454.2 tsunagi [Drosophila melanogaster]		1	7	6	0	0	1	1	1	4	6	0	2	3	0		0.120389	1.2666	0.158873	0	0	0.161378	0.156646	0.0953357	0.431519	0.530161	0	0.237888	0.19881	0
SBULL_11657.mrna1	584	synaptic vesicle glycoprotein 2B	3	C:GO:0016021; F:GO:0022857; P:GO:0055085	C:integral component of membrane; F:transmembrane transporter activity; P:transmembrane transport						NP_727117.1 uncharacterized protein Dmel_CG3168, isoform C [Drosophila melanogaster]		28756	10925	15172	7399	10139	7448	1441	1051	1208	1391	2177	2551	1956	2983		1566.93	890.53	179.256	782.287	1111.25	538.519	100.26	45.4343	59.0926	55.7326	115.158	137.588	58.7776	413.883
SBULL_11668.mrna1	187	60S ribosomal protein L17	3	P:GO:0002181; F:GO:0003735; C:GO:0022625	P:cytoplasmic translation; F:structural constituent of ribosome; C:cytosolic large ribosomal subunit						NP_727120.1 ribosomal protein L17, isoform C [Drosophila melanogaster]		8284	11262	50197	8702	17796	19263	12010	14614	14267	23363	16120	13883	24620	32101		1896.24	3886.57	2080.89	3898.81	8486.98	5948.57	3610.76	2740.09	3027.01	4060	3698.42	3247.63	3208.83	17411.8
SBULL_11669.mrna1	91	---NA---											7	18	39	19	10	2	11	2	1	5	1	2	12	5		3.9666	22.8148	3.70745	21.7768	16.564	1.37314	13.8845	1.74857	0.989322	4.05157	1.06981	2.18158	7.29283	9.2056
SBULL_11673.mrna1	447	protein ariadne-1	11	C:GO:0005634; C:GO:0005737; P:GO:0006511; P:GO:0007029; P:GO:0016567; F:GO:0031624; F:GO:0046872; F:GO:0046983; P:GO:0048477; P:GO:0050769; F:GO:0061630	C:nucleus; C:cytoplasm; P:ubiquitin-dependent protein catabolic process; P:endoplasmic reticulum organization; P:protein ubiquitination; F:ubiquitin conjugating enzyme binding; F:metal ion binding; F:protein dimerization activity; P:oogenesis; P:positive regulation of neurogenesis; F:ubiquitin protein ligase activity						NP_996500.1 ariadne 1, isoform C [Drosophila melanogaster]		7919	401	1818	862	564	897	1651	2412	1545	1796	1033	1061	2169	177		589.329	44.9688	28.7218	126.969	91.0913	88.7012	159.106	141.965	102.9	97.974	74.3976	77.9125	88.7412	33.0948
SBULL_11679.mrna1	1150	ras GTPase-activating protein 1	8	F:GO:0005096; C:GO:0005737; P:GO:0016319; P:GO:0030100; P:GO:0040008; P:GO:0043547; P:GO:0046580; P:GO:0048149	F:GTPase activator activity; C:cytoplasm; P:mushroom body development; P:regulation of endocytosis; P:regulation of growth; P:positive regulation of GTPase activity; P:negative regulation of Ras protein signal transduction; P:behavioral response to ethanol						NP_996482.1 vacuolar peduncle, isoform D [Drosophila melanogaster]		191	9234	18909	93	955	133	384	1679	2001	1441	1481	1618	2335	144		5.02144	367.546	109.25	4.95362	53.6528	4.72046	13.1744	34.6128	46.6786	27.5328	37.359	41.6152	33.4607	9.55383
SBULL_1168.mrna1	359	abscission/NoCut checkpoint regulator	1	F:GO:0046872	F:metal ion binding						NP_573077.2 uncharacterized protein Dmel_CG15602, isoform A [Drosophila melanogaster]		306	142	300	94	88	150	126	185	136	208	222	208	346	30		32.3992	24.5542	9.04294	17.4721	23.7114	20.4587	17.1849	25.1442	22.4672	27.0701	40.3355	36.6311	34.9567	12.2678
SBULL_1169.mrna1	214	glutaredoxin 3	6	F:GO:0005515; C:GO:0005623; F:GO:0009055; F:GO:0015035; P:GO:0022900; P:GO:0045454	F:protein binding; C:cell; F:electron transfer activity; F:protein disulfide oxidoreductase activity; P:electron transport chain; P:cell redox homeostasis						NP_609641.1 uncharacterized protein Dmel_CG6523 [Drosophila melanogaster]		279	97	2242	116	238	85	55	1217	1100	1553	1518	1269	2522	334		52.8267	27.7476	89.2395	43.6956	98.3493	21.7066	13.6762	185.975	190.213	219.956	283.85	241.943	267.899	152.185
SBULL_11695.mrna1	43	---NA---											0	1	43	0	1	0	0	18	16	12	16	22	41	0		0	0	216.839	0	680.408	0	0	227.359	228.689	140.482	247.295	346.697	359.986	0
SBULL_11697.mrna1	728	hyphally regulated cell wall protein 3									NP_569909.2 uncharacterized protein Dmel_CG32813, isoform H [Drosophila melanogaster]		198	46	1848	130	190	277	267	342	267	438	352	261	415	72		8.10761	2.99227	17.1954	10.7076	16.9017	15.126	14.5763	11.5469	10.2009	13.7062	14.5425	10.9943	9.73983	7.75064
SBULL_11704.mrna1	345	probable elongator complex protein 2	16	C:GO:0000502; C:GO:0000776; P:GO:0002098; C:GO:0005634; C:GO:0005813; C:GO:0005874; C:GO:0005875; C:GO:0005938; P:GO:0006355; P:GO:0006368; F:GO:0008017; P:GO:0010950; C:GO:0033588; P:GO:0043248; F:GO:0061133; F:GO:0070840	C:proteasome complex; C:kinetochore; P:tRNA wobble uridine modification; C:nucleus; C:centrosome; C:microtubule; C:microtubule associated complex; C:cell cortex; P:regulation of transcription, DNA-templated; P:transcription elongation from RNA polymerase II promoter; F:microtubule binding; P:positive regulation of endopeptidase activity; C:Elongator holoenzyme complex; P:proteasome assembly; F:en…						NP_610600.1 elongator complex protein 2 [Drosophila melanogaster]		51	12	656	26	66	15	9	114	99	139	148	158	227	147		5.2074	1.84079	14.276	5.35894	14.7917	2.32522	1.32659	9.4225	9.38647	10.5991	15.1759	17.0811	12.9876	37.0488
SBULL_11708.mrna1	63	weary, isoform B	6	P:GO:0003015; F:GO:0005112; F:GO:0005509; P:GO:0007219; C:GO:0009986; C:GO:0016021	P:heart process; F:Notch binding; F:calcium ion binding; P:Notch signaling pathway; C:cell surface; C:integral component of membrane						NP_995611.2 weary, isoform B [Drosophila melanogaster]		0	0	9	2	1	0	0	4	3	8	0	0	3	0		0	0	2.56389	66.9021	0	0	0	11.7193	9.94596	21.7236	0	0	6.10976	0
SBULL_11710.mrna1	802	putative GPI-anchored protein PB15E9.01c	7	P:GO:0003015; F:GO:0005112; F:GO:0005509; P:GO:0007219; C:GO:0009986; C:GO:0016020; C:GO:0016021	P:heart process; F:Notch binding; F:calcium ion binding; P:Notch signaling pathway; C:cell surface; C:membrane; C:integral component of membrane								8	0	186	77	27	12	40	78	57	136	49	23	70	38		0.312203	0	1.60423	6.03116	2.32127	0.625881	2.0178	2.36824	1.95835	3.8271	1.82046	0.871257	1.47737	3.73938
SBULL_11718.mrna1	31	---NA---											0	0	0	0	0	0	0	0	0	0	0	0	0	0		0	0	0	0	0	0	0	0	0	0	0	0	0	0
SBULL_11722.mrna1	215	hypothetical protein FF38_02726, partial											1570	1	2	150	0	1	0	1086	471	380	8	38	233	0		295.257	0.284181	0.0413542	57.2336	0	0.253693	0	164.827	80.8916	53.4543	1.48574	7.19564	24.5819	0
SBULL_11724.mrna1	144	glutamate receptor ionotropic, kainate 2	7	F:GO:0005216; C:GO:0005886; P:GO:0006811; P:GO:0007165; F:GO:0038023; C:GO:0044425; C:GO:0045202	F:ion channel activity; C:plasma membrane; P:ion transport; P:signal transduction; F:signaling receptor activity; C:membrane part; C:synapse						NP_001036373.1 clumsy, isoform B [Drosophila melanogaster]		2	0	45	54	24	51	183	47	51	68	16	0	7	0		0.703927	0	2.97321	32.7168	15.9916	19.9848	68.61	13.8009	16.9459	18.5063	5.74888	0	1.42879	0
SBULL_11728.mrna1	226	survival motor neuron protein	31	P:GO:0000387; P:GO:0002164; P:GO:0007274; P:GO:0007417; P:GO:0007528; P:GO:0008345; P:GO:0009792; C:GO:0015030; P:GO:0017145; C:GO:0030018; P:GO:0030240; C:GO:0031594; P:GO:0032224; C:GO:0032797; P:GO:0033962; C:GO:0034718; C:GO:0034730; P:GO:0035154; F:GO:0042802; P:GO:0045175; P:GO:0048601; P:GO:0048863; P:GO:0051276; F:GO:0051393; P:GO:0060079; C:GO:0071254; P:GO:0072089; P:GO:0072553; P:GO:00…	P:spliceosomal snRNP assembly; P:larval development; P:neuromuscular synaptic transmission; P:central nervous system development; P:neuromuscular junction development; P:larval locomotory behavior; P:embryo development ending in birth or egg hatching; C:Cajal body; P:stem cell division; C:Z disc; P:skeletal muscle thin filament assembly; C:neuromuscular junction; P:positive regulation of synaptic…						NP_524112.1 survival motor neuron, isoform A [Drosophila melanogaster]		269	212	1450	151	243	222	177	676	522	759	835	873	1197	185		35.2264	43.2048	43.5155	38.3017	56.972	42.1115	36.6046	95.4546	83.4075	99.3328	144.275	153.798	117.491	78.4858
SBULL_11732.mrna1	407	casein kinase I	14	F:GO:0004674; F:GO:0005515; F:GO:0005524; C:GO:0005634; C:GO:0005829; P:GO:0006281; P:GO:0007623; P:GO:0008360; P:GO:0018105; C:GO:0030877; P:GO:0032436; P:GO:0042593; P:GO:0045879; P:GO:0090090	F:protein serine/threonine kinase activity; F:protein binding; F:ATP binding; C:nucleus; C:cytosol; P:DNA repair; P:circadian rhythm; P:regulation of cell shape; P:peptidyl-serine phosphorylation; C:beta-catenin destruction complex; P:positive regulation of proteasomal ubiquitin-dependent protein catabolic process; P:glucose homeostasis; P:negative regulation of smoothened signaling pathway; P:ne…	EC:2.7.11	Transferring phosphorus-containing groups				NP_727632.1 casein kinase ialpha, isoform G [Drosophila melanogaster]		698	389	7191	585	1201	468	413	4807	4264	5107	5053	5025	8028	903		57.9645	48.9325	127.157	97.0629	217.366	52.2536	44.3361	318.094	319.516	313.116	408.558	414.599	369.043	187.855
SBULL_11737.mrna1	109	serine palmitoyltransferase small subunit A	1	C:GO:0016020	C:membrane						NP_001287557.1 uncharacterized protein Dmel_CG34293, isoform B [Drosophila melanogaster]		69	68	501	59	101	131	124	218	204	275	218	235	465	7		38.0203	54.0673	57.3477	71.4088	100.667	102.968	100.572	117.06	123.956	136.863	143.24	157.438	173.568	8.98841
SBULL_11739.mrna1	268	nucleolar protein 12	7	C:GO:0005730; P:GO:0007000; P:GO:0008284; P:GO:0030307; P:GO:0035214; P:GO:0043066; P:GO:0045572	C:nucleolus; P:nucleolus organization; P:positive regulation of cell proliferation; P:positive regulation of cell growth; P:eye-antennal disc development; P:negative regulation of apoptotic process; P:positive regulation of imaginal disc growth						NP_729096.1 viriato [Drosophila melanogaster]		54	78	936	24	203	97	42	253	249	396	278	280	528	272		7.57327	16.238	26.2194	6.5341	52.523	17.6844	7.49385	28.2211	31.4296	40.9402	37.9449	38.9673	40.9402	92.9734
SBULL_11742.mrna1	192	claspin	2	C:GO:0005634; P:GO:0033314	C:nucleus; P:mitotic DNA replication checkpoint						NP_728981.1 claspin, isoform A [Drosophila melanogaster]		3	1	234	0	11	0	0	27	28	28	62	74	131	10		0.666443	0.334661	10.4413	0	5.32653	0	0	4.85824	5.7011	4.66954	13.6509	16.6125	16.3851	5.27152
SBULL_11745.mrna1	225	putative claspin											8	16	273	1	8	3	0	10	8	28	50	52	67	11		1.4148	4.25833	9.49807	0.359443	3.092	0.712658	0	1.41803	1.28369	3.67998	8.67584	9.19979	6.60425	4.68466
SBULL_11747.mrna1	262	mediator of RNA polymerase II transcription subunit 18	6	F:GO:0003712; F:GO:0005515; P:GO:0006357; P:GO:0006369; C:GO:0016592; C:GO:0070847	F:transcription coregulator activity; F:protein binding; P:regulation of transcription by RNA polymerase II; P:termination of RNA polymerase II transcription; C:mediator complex; C:core mediator complex						NP_569948.3 mediator complex subunit 18, isoform A [Drosophila melanogaster]		67	47	899	41	112	47	27	326	304	343	426	322	518	150		9.10036	8.90624	26.3642	11.4161	35.1074	8.52726	4.70802	38.2939	40.0793	37.517	60.5073	46.629	41.8869	52.7359
SBULL_11754.mrna1	41	---NA---											0	0	0	0	0	0	0	1	0	0	0	1	0	0		0	0	0	0	0	0	0	61.4042	121.596	42.6835	112.705	95.7625	117.38	0
SBULL_11756.mrna1	376	Krueppel-like factor luna	1	F:GO:0003676	F:nucleic acid binding						NP_611747.2 uncharacterized protein Dmel_CG42741 [Drosophila melanogaster]		0	2	36	8	3	4	14	70	53	110	25	10	43	1		0	0.27646	0.689365	1.48482	0.606355	0.492939	1.67258	5.06992	4.34374	7.38408	2.21563	0.90363	2.16488	0.22793
SBULL_11759.mrna1	439	colorectal mutant cancer protein isoform X1									NP_650457.2 uncharacterized protein Dmel_CG34404, isoform C [Drosophila melanogaster]		34	31	417	28	41	24	55	224	200	236	297	238	365	35		2.22304	3.56806	6.76156	4.01394	6.2347	2.05182	5.16825	13.4685	13.6077	13.1517	21.8515	17.854	15.2555	6.67939
SBULL_11760.mrna1	334	colorectal mutant cancer protein isoform X2									NP_650456.2 uncharacterized protein Dmel_CG34404, isoform E [Drosophila melanogaster]		65	51	447	64	80	67	95	222	196	201	246	223	366	38		6.57035	7.16507	9.91446	12.8397	16.7438	8.80268	12.8086	18.5715	18.5539	15.5844	25.1816	23.2748	21.2832	9.92717
SBULL_11770.mrna1	200	ubiquitin-conjugating enzyme E2 S	6	F:GO:0005524; P:GO:0010458; P:GO:0016567; F:GO:0016740; P:GO:0031145; P:GO:0051301	F:ATP binding; P:exit from mitosis; P:protein ubiquitination; F:transferase activity; P:anaphase-promoting complex-dependent catabolic process; P:cell division						NP_573237.2 uncharacterized protein Dmel_CG8188, isoform A [Drosophila melanogaster]		721	88	3342	54	121	67	99	404	336	301	337	340	443	37		125.151	23.0087	138.371	14.9321	44.2829	14.0726	23.5889	68.2867	64.2656	47.1544	69.701	71.7004	52.05	18.4517
SBULL_11773.mrna1	49	---NA---											2	0	106	1	1	0	0	45	35	40	52	46	82	3		190.688	0	158.522	424.53	276.577	0	0	338.196	297.652	278.623	478.205	431.322	428.383	39.331
SBULL_11776.mrna1	260	zinc finger protein 224	3	F:GO:0003676; C:GO:0005634; F:GO:0008270	F:nucleic acid binding; C:nucleus; F:zinc ion binding						NP_648789.3 uncharacterized protein Dmel_CG7372 [Drosophila melanogaster]		21	3	161	0	21	11	3	11	7	11	22	11	22	3		3.06407	0.658276	5.22306	0	7.02787	2.15345	0.760977	2.67248	2.62967	2.69232	5.11851	5.36384	5.49234	1.06485
SBULL_11781.mrna1	367	aryl hydrocarbon receptor nuclear translocator homolog isoform X1	10	F:GO:0004880; F:GO:0005500; C:GO:0005634; C:GO:0005667; C:GO:0005737; F:GO:0008134; P:GO:0035626; P:GO:0043069; P:GO:0045944; F:GO:0046982	F:juvenile hormone receptor activity; F:juvenile hormone binding; C:nucleus; C:transcription factor complex; C:cytoplasm; F:transcription factor binding; P:juvenile hormone mediated signaling pathway; P:negative regulation of programmed cell death; P:positive regulation of transcription by RNA polymerase II; F:protein heterodimerization activity						NP_511160.2 germ cell-expressed bHLH-PAS, isoform C [Drosophila melanogaster]		21	29	80	38	59	62	138	20	14	23	10	17	27	37		2.17912	4.26947	1.75309	7.26272	12.8989	7.99358	17.0999	2.08902	2.36389	2.00532	1.82587	2.51325	2.12633	9.37756
SBULL_11785.mrna1	246	protein grainyhead isoform X4									NP_001246401.1 grainy head, isoform O [Drosophila melanogaster]		25	91	237	63	23	85	135	99	136	109	82	56	106	0		3.76804	20.0743	7.78728	18.7927	7.55734	17.0698	25.8165	12.4082	19.2885	12.662	12.576	8.7569	9.23512	0
SBULL_11788.mrna1	342	thiol reductant ABC exporter subunit CydD	5	F:GO:0005524; C:GO:0016021; F:GO:0042626; P:GO:0042883; P:GO:0055085	F:ATP binding; C:integral component of membrane; F:ATPase activity, coupled to transmembrane movement of substances; P:cysteine transport; P:transmembrane transport	EC:3.6.1.3; EC:3.6.1.15	Adenosinetriphosphatase; Nucleoside-triphosphate phosphatase				NP_523724.2 multi drug resistance 49, isoform A [Drosophila melanogaster]		0	0	0	0	0	0	0	0	0	0	0	0	0	0		0	0	0	0	0	0	0	0	0	0	0	0	0	0
SBULL_11791.mrna1	106	---NA---											7	20	106	2	2	5	6	46	44	99	126	75	138	3		4.58426	19.9299	12.5828	2.78414	2.7859	4.47704	5.34469	26.4958	28.6785	52.8513	88.8064	53.8975	55.2536	4.05925
SBULL_11796.mrna1	259	serine-rich adhesin for platelets isoform X2									NP_001188739.1 uncharacterized protein Dmel_CG34398, isoform G [Drosophila melanogaster]		4	5	78	14	5	34	106	50	97	42	160	75	153	11		0.585603	1.10084	2.50774	4.74762	1.60259	7.8573	20.4257	7.46238	15.7011	5.29535	27.2512	14.111	15.9671	4.2731
SBULL_11797.mrna1	133	serine-rich adhesin for platelets isoform X3									NP_001188739.1 uncharacterized protein Dmel_CG34398, isoform G [Drosophila melanogaster]		1	3	88	19	8	15	11	39	54	22	88	46	70	11		0.404485	1.83571	7.32497	13.4344	6.10773	3.8353	2.69363	18.4398	27.4351	12.3432	47.6346	28.1187	26.1107	10.8659
SBULL_11798.mrna1	126	serine-rich adhesin for platelets isoform X3											0	0	32	5	2	7	8	20	27	17	43	12	30	4		0	0	4.35217	4.69856	2.90921	4.89268	9.03943	16.9084	24.3514	9.97263	32.4455	13.4245	19.7672	4.97113
SBULL_11808.mrna1	152	CSC1-like protein 2	3	C:GO:0005737; C:GO:0016021; C:GO:0045177	C:cytoplasm; C:integral component of membrane; C:apical part of cell						NP_610351.1 uncharacterized protein Dmel_CG11210 [Drosophila melanogaster]		48	23	185	26	27	48	86	152	121	182	57	51	80	3		15.3949	11.6222	12.1877	19.1572	18.0742	21.2219	39.0279	48.6156	45.0921	59.8318	24.3804	19.2238	17.3586	2.21223
SBULL_11811.mrna1	959	sal-like protein 1	1	F:GO:0003676	F:nucleic acid binding						NP_651146.2 uncharacterized protein Dmel_CG4374, isoform B [Drosophila melanogaster]		0	4	352	18	11	25	8	232	180	351	56	4	132	9		0	0.193345	2.46519	1.09884	0.781215	1.03338	0.333053	5.808	5.09913	8.14417	1.71546	0.124936	2.29707	0.733017
SBULL_11822.mrna1	820	hypothetical protein FF38_13554	1	C:GO:0016020	C:membrane						NP_651373.2 uncharacterized protein Dmel_CG31300 [Drosophila melanogaster]		4	14	78	127	287	37	18	30	13	81	11	4	5	223		0.152532	0.800885	0.682681	9.79582	24.6994	1.88562	0.887185	1.24581	0.503476	2.72169	0.61703	0.222045	0.123713	21.7377
SBULL_11826.mrna1	355	uncharacterized protein LOC111676915	1	C:GO:0016021	C:integral component of membrane						NP_651373.2 uncharacterized protein Dmel_CG31300 [Drosophila melanogaster]		0	3	2	0	1	3	4	13	1	23	0	1	3	6		0	0.444464	0.108597	0	1.94863	0.396285	0.51239	1.78774	0.35182	2.59346	0.0951109	0.193952	0.162091	3.41207
SBULL_11829.mrna1	423	uncharacterized protein LOC111676913	1	C:GO:0016021	C:integral component of membrane						NP_651373.2 uncharacterized protein Dmel_CG31300 [Drosophila melanogaster]		13	27	22	218	201	155	91	44	20	91	0	3	11	53		1.04069	3.2456	0.388283	34.1896	35.0113	16.3939	9.44774	2.76484	1.42211	5.29981	0	0.235194	0.480477	10.5505
SBULL_11831.mrna1	318	putative tRNA (cytidine(32)/guanosine(34)-2'-O)-methyltransferase 1	6	P:GO:0002128; P:GO:0002181; C:GO:0005737; F:GO:0008175; C:GO:0016021; P:GO:0051301	P:tRNA nucleoside ribose methylation; P:cytoplasmic translation; C:cytoplasm; F:tRNA methyltransferase activity; C:integral component of membrane; P:cell division						NP_650590.1 uncharacterized protein Dmel_CG5220 [Drosophila melanogaster]		263	215	522	57	79	96	89	62	49	82	36	64	74	84		17.6076	20.0141	20.8373	12.9996	21.0448	9.52908	7.63209	13.1173	11.4101	15.4657	9.60868	14.5843	11.3512	45.2488
SBULL_11842.mrna1	968	UPF0505 protein CG8202									NP_649826.3 uncharacterized protein Dmel_CG8202 [Drosophila melanogaster]		78	254	1153	32	36	33	52	275	258	242	274	312	420	66		2.26524	10.959	7.8866	2.04781	2.39073	1.27888	1.77234	6.81564	7.23567	5.55892	8.30958	9.64753	7.23578	5.32265
SBULL_11848.mrna1	678	ribosomal protein S6 kinase delta-1	5	F:GO:0004672; F:GO:0005524; P:GO:0006468; C:GO:0016020; F:GO:0035091	F:protein kinase activity; F:ATP binding; P:protein phosphorylation; C:membrane; F:phosphatidylinositol binding						NP_650697.1 uncharacterized protein Dmel_CG7156 [Drosophila melanogaster]		244	1013	2001	65	102	96	122	293	268	241	296	293	467	69		11.4488	71.3195	20.5748	6.12576	10.4354	6.02188	7.40422	10.7143	11.0896	8.16796	13.2447	13.3675	11.8707	8.1418
SBULL_11853.mrna1	718	probable serine/threonine-protein kinase nek3									NP_732650.1 uncharacterized protein Dmel_CG31176 [Drosophila melanogaster]		291	12	782	82	100	96	12	595	1699	412	77	33	105	117		12.8218	0.793295	7.56404	7.25489	9.50974	5.65418	0.683728	20.4187	65.9764	13.1041	3.23337	1.4129	2.50474	12.9767
SBULL_11877.mrna1	644	dihydroxyacetone phosphate acyltransferase	3	C:GO:0005778; P:GO:0008611; F:GO:0016287	C:peroxisomal membrane; P:ether lipid biosynthetic process; F:glycerone-phosphate O-acyltransferase activity	EC:2.3.1.42	Glycerone-phosphate O-acyltransferase				NP_525010.1 dihydroxyacetone phosphate acyltransferase, isoform A [Drosophila melanogaster]		352	20	1197	31	31	37	47	252	204	151	101	62	193	35		11.8195	1.11781	12.4605	2.59406	2.95212	2.12474	2.63422	9.759	8.93964	5.41979	4.78609	2.9956	5.19546	4.36703
SBULL_11885.mrna1	673	RalA-binding protein 1	6	F:GO:0005096; P:GO:0006898; C:GO:0016020; F:GO:0017160; P:GO:0043547; P:GO:0046578	F:GTPase activator activity; P:receptor-mediated endocytosis; C:membrane; F:Ral GTPase binding; P:positive regulation of GTPase activity; P:regulation of Ras protein signal transduction						NP_650933.2 Ral interacting protein, isoform A [Drosophila melanogaster]		254	446	1734	89	179	136	81	341	227	364	379	403	548	48		12.0156	31.6575	17.9526	8.4565	18.6453	8.60092	4.95629	12.5726	9.47068	12.4386	17.0987	18.538	14.0447	5.70945
SBULL_11886.mrna1	338	malate dehydrogenase, mitochondrial	8	C:GO:0005739; P:GO:0005975; P:GO:0006099; P:GO:0006919; F:GO:0030060; P:GO:0035071; P:GO:0035096; P:GO:0035209	C:mitochondrion; P:carbohydrate metabolic process; P:tricarboxylic acid cycle; P:activation of cysteine-type endopeptidase activity involved in apoptotic process; F:L-malate dehydrogenase activity; P:salivary gland cell autophagic cell death; P:larval midgut cell programmed cell death; P:pupal development	EC:1.1.1.37	Malate dehydrogenase				NP_650696.1 malate dehydrogenase 2 [Drosophila melanogaster]		13613	2089	11090	20403	13171	26965	29980	5979	4971	9960	3534	3054	5986	4006		1365.32	315.853	229.884	4032.86	2759.23	3669.72	3994.98	493.999	464.757	762.707	357.288	314.814	343.793	1034.08
SBULL_11900.mrna1	1271	jmjC domain-containing histone demethylation protein 1	9	F:GO:0003677; P:GO:0007379; P:GO:0007526; F:GO:0008270; C:GO:0031519; P:GO:0033522; F:GO:0034647; P:GO:0034721; P:GO:0070544	F:DNA binding; P:segment specification; P:larval somatic muscle development; F:zinc ion binding; C:PcG protein complex; P:histone H2A ubiquitination; F:histone demethylase activity (H3-trimethyl-K4 specific); P:histone H3-K4 demethylation, trimethyl-H3-K4-specific; P:histone H3-K36 demethylation						NP_649864.2 lysine (K)-specific demethylase 2, isoform B [Drosophila melanogaster]		2422	519	8766	171	293	175	146	1398	1155	1000	839	927	1261	234		56.2118	17.9285	45.9931	7.95521	14.8142	5.3016	4.4142	25.9211	24.2333	17.1849	19.0354	21.4444	16.2526	14.1811
SBULL_11901.mrna1	575	protein Red	4	C:GO:0005634; P:GO:0007274; P:GO:0007528; P:GO:0072553	C:nucleus; P:neuromuscular synaptic transmission; P:neuromuscular junction development; P:terminal button organization						NP_649865.1 beag [Drosophila melanogaster]		6	1	21	8	3	1	1	4	3	5	3	4	11	0		6.98614	3.8895	12.4885	4.30373	10.7873	5.12346	3.06297	6.20358	6.12369	6.76912	7.91399	9.44147	6.42251	9.46233
SBULL_11902.mrna1	538	putative GTP-binding protein 6	1	F:GO:0005525	F:GTP binding						NP_651399.2 uncharacterized protein Dmel_CG5116, isoform A [Drosophila melanogaster]		77	140	491	77	113	133	137	130	138	181	71	91	159	109		6.31466	17.0421	9.46172	14.0421	23.1116	16.405	14.5452	11.1533	11.7616	13.4164	9.35011	9.47423	10.2603	25.6842
SBULL_11906.mrna1	104	transmembrane protein 141	4	P:GO:0003341; C:GO:0005930; C:GO:0016021; P:GO:0036158	P:cilium movement; C:axoneme; C:integral component of membrane; P:outer dynein arm assembly						NP_001163729.1 uncharacterized protein Dmel_CG42488 [Drosophila melanogaster]		16	56	121	20	47	23	53	52	39	46	37	35	43	15		10.2894	58.4936	14.969	29.249	65.5429	19.7185	49.5818	31.4553	26.6956	25.7899	27.3872	26.4147	18.0809	21.0483
SBULL_11927.mrna1	257	14-3-3 protein epsilon	21	P:GO:0000077; C:GO:0005634; C:GO:0005694; C:GO:0005737; P:GO:0007088; P:GO:0007093; P:GO:0007280; P:GO:0007294; P:GO:0007411; P:GO:0008103; F:GO:0008134; P:GO:0008340; P:GO:0009411; F:GO:0019904; P:GO:0035332; P:GO:0042994; C:GO:0045172; P:GO:0045927; F:GO:0046982; P:GO:0048190; F:GO:0050815	P:DNA damage checkpoint; C:nucleus; C:chromosome; C:cytoplasm; P:regulation of mitotic nuclear division; P:mitotic cell cycle checkpoint; P:pole cell migration; P:germarium-derived oocyte fate determination; P:axon guidance; P:oocyte microtubule cytoskeleton polarization; F:transcription factor binding; P:determination of adult lifespan; P:response to UV; F:protein domain specific binding; P:posi…						NP_732312.1 14-3-3epsilon, isoform C [Drosophila melanogaster]		2418	3130	18813	1626	2141	2402	1517	5490	5130	7408	10710	9851	16728	2452		166.374	322.406	540.318	200.615	314.264	160.626	89.8399	648.037	685.219	810.455	1546.93	1450.76	1372.57	880.185
SBULL_11934.mrna1	525	fatty-acid amide hydrolase 2	3	C:GO:0016021; F:GO:0016787; F:GO:0016874	C:integral component of membrane; F:hydrolase activity; F:ligase activity						NP_651400.1 uncharacterized protein Dmel_CG5112 [Drosophila melanogaster]		408	2228	7332	380	504	656	549	1389	1535	804	679	536	1060	129		24.7192	203.132	95.3344	44.5711	65.6434	53.689	43.9774	67.7987	84.7837	36.3727	40.5549	32.6416	35.9656	20.1437
SBULL_1194.mrna1	69	alanine--glyoxylate aminotransferase 2-like	8	F:GO:0004096; P:GO:0006979; F:GO:0008483; F:GO:0020037; F:GO:0030170; P:GO:0035094; P:GO:0055114; P:GO:0098869	F:catalase activity; P:response to oxidative stress; F:transaminase activity; F:heme binding; F:pyridoxal phosphate binding; P:response to nicotine; P:oxidation-reduction process; P:cellular oxidant detoxification	EC:1.11.1.7; EC:1.11.1.6	Peroxidase; Catalase				NP_648665.1 uncharacterized protein Dmel_CG8745 [Drosophila melanogaster]		115	61	104	53	126	109	167	9	5	32	6	5	13	15		47.4145	26.2714	26.0764	32.8263	129.503	97.215	43.5457	19.1253	12.0232	63.0256	15.6017	13.2563	19.2031	54.9436
SBULL_11942.mrna1	565	transcription termination factor 5, mitochondrial	4	F:GO:0003690; C:GO:0005739; P:GO:0006355; P:GO:0006390	F:double-stranded DNA binding; C:mitochondrion; P:regulation of transcription, DNA-templated; P:mitochondrial transcription						NP_650693.1 mitochondrial transcription termination factor 5 [Drosophila melanogaster]		547	455	905	114	197	159	169	313	181	366	151	124	269	220		33.9586	47.5166	16.7063	14.9019	28.4508	13.5248	14.5793	23.6979	15.3887	25.167	12.6865	14.1672	13.6651	46.6498
SBULL_1195.mrna1	412	alanine--glyoxylate aminotransferase 2-like	8	F:GO:0004096; P:GO:0006979; F:GO:0008483; F:GO:0020037; F:GO:0030170; P:GO:0035094; P:GO:0055114; P:GO:0098869	F:catalase activity; P:response to oxidative stress; F:transaminase activity; F:heme binding; F:pyridoxal phosphate binding; P:response to nicotine; P:oxidation-reduction process; P:cellular oxidant detoxification	EC:1.11.1.7; EC:1.11.1.6	Peroxidase; Catalase				NP_648665.1 uncharacterized protein Dmel_CG8745 [Drosophila melanogaster]		1456	645	1136	1493	1000	1914	1582	47	43	237	30	32	176	310		119.641	79.7261	19.5115	246.903	181.255	211.326	169.333	3.0478	3.15531	14.2442	2.38048	2.58897	7.93349	63.5955
SBULL_11953.mrna1	315	ribosome production factor 2 homolog	6	P:GO:0000027; P:GO:0000463; C:GO:0005730; F:GO:0019843; P:GO:0051301; P:GO:0090307	P:ribosomal large subunit assembly; P:maturation of LSU-rRNA from tricistronic rRNA transcript (SSU-rRNA, 5.8S rRNA, LSU-rRNA); C:nucleolus; F:rRNA binding; P:cell division; P:mitotic spindle assembly						NP_650694.2 novel nucleolar protein 3 [Drosophila melanogaster]		147	185	1914	57	355	121	80	340	256	470	332	381	635	848		16.3315	30.5495	42.0899	12.2321	83.1663	18.2136	11.1395	30.7079	26.1635	39.3432	36.6913	42.9322	39.8663	238.089
SBULL_11954.mrna1	231	COMM domain-containing protein 2	3	F:GO:0003674; C:GO:0005575; P:GO:0008150	F:molecular_function; C:cellular_component; P:biological_process						NP_650695.1 uncharacterized protein Dmel_CG7168 [Drosophila melanogaster]		41	113	447	34	67	42	55	113	111	159	101	82	178	43		6.83701	29.0629	15.9298	11.458	25.0365	9.64085	12.2824	15.4666	17.1919	20.1704	16.9158	14.0029	16.9355	17.7335
SBULL_11959.mrna1	723	segmentation protein paired	3	P:GO:0006355; F:GO:0043565; C:GO:0044424	P:regulation of transcription, DNA-templated; F:sequence-specific DNA binding; C:intracellular part						NP_477026.1 reversed polarity [Drosophila melanogaster]		8	37	349	221	115	221	359	180	168	208	302	170	288	72		0.349823	2.42748	3.30423	19.3166	10.9789	12.9178	20.2996	6.12992	6.47406	6.56518	12.5847	7.22302	6.81769	7.92616
SBULL_11967.mrna1	76	peptidyl-prolyl cis-trans isomerase-like 3	2	P:GO:0000413; F:GO:0003755	P:protein peptidyl-prolyl isomerization; F:peptidyl-prolyl cis-trans isomerase activity	EC:5.2.1.8	Peptidylprolyl isomerase				NP_724939.1 uncharacterized protein Dmel_CG11777 [Drosophila melanogaster]		90	35	290	31	25	30	6	56	46	83	77	58	101	6		22.2836	19.3246	16.9138	17.3774	10.267	9.38807	2.90977	17.1191	15.9124	23.7998	29.5512	22.1212	21.8873	4.96833
SBULL_11980.mrna1	161	small nuclear ribonucleoprotein Sm D3	18	C:GO:0000243; P:GO:0000387; F:GO:0003723; F:GO:0005515; C:GO:0005682; C:GO:0005686; C:GO:0005689; P:GO:0007417; P:GO:0007422; P:GO:0007517; P:GO:0030182; C:GO:0034715; C:GO:0034719; P:GO:0045451; C:GO:0045495; P:GO:0048542; C:GO:0071010; C:GO:0097526	C:commitment complex; P:spliceosomal snRNP assembly; F:RNA binding; F:protein binding; C:U5 snRNP; C:U2 snRNP; C:U12-type spliceosomal complex; P:central nervous system development; P:peripheral nervous system development; P:muscle organ development; P:neuron differentiation; C:pICln-Sm protein complex; C:SMN-Sm protein complex; P:pole plasm oskar mRNA localization; C:pole plasm; P:lymph gland de…						NP_725106.1 small ribonucleoprotein particle protein SmD3 [Drosophila melanogaster]		89	123	1315	42	198	89	89	224	186	317	407	386	510	138		24.787	53.2406	75.5146	24.5591	123.457	33.829	33.0912	58.0652	52.9444	75.3879	124.486	124.233	89.0644	92.7118
SBULL_11991.mrna1	94	putative fatty acyl-CoA reductase CG8306	8	P:GO:0006629; P:GO:0010884; C:GO:0016021; P:GO:0030308; F:GO:0050062; P:GO:0055114; F:GO:0080019; F:GO:0102965	P:lipid metabolic process; P:positive regulation of lipid storage; C:integral component of membrane; P:negative regulation of cell growth; F:long-chain-fatty-acyl-CoA reductase activity; P:oxidation-reduction process; F:fatty-acyl-CoA reductase (alcohol-forming) activity; F:alcohol-forming fatty acyl-CoA reductase activity	EC:1.2.1.84; EC:1.2.1.50	Alcohol-forming fatty acyl-CoA reductase; Long-chain-fatty-acyl-CoA reductase				NP_652021.1 fatty acyl-CoA reductase in oenocytes [Drosophila melanogaster]		0	0	9	0	0	0	0	0	0	1	0	0	0	1		0	0	1.62065	0	0	0	0	0	0	0.738033	0	0	0	1.71862
SBULL_11992.mrna1	395	arginine/serine-rich coiled-coil protein 2 isoform X2									NP_573034.1 uncharacterized protein Dmel_CG6340, isoform B [Drosophila melanogaster]		0	1	32	0	0	1	0	10	6	8	22	14	19	7		20.9142	24.2415	20.9419	18.368	38.8924	30.905	33.7826	29.1293	26.0146	36.8614	40.9028	45.7902	35.8972	44.9997
SBULL_12004.mrna1	85	---NA---											0	0	0	0	0	0	0	3	10	0	3	1	2	0		0	0	0	0	0	0	0	8.58056	20.6329	4.97046	7.87466	6.69088	2.98228	0
SBULL_12006.mrna1	351	GATA zinc finger domain-containing protein 7									NP_611289.2 uncharacterized protein Dmel_CG34386, isoform D [Drosophila melanogaster]		4	2	0	29	28	0	0	115	65	30	1	13	27	102		0.399948	0.300418	0	5.85211	6.14579	0	0	9.06504	5.79789	2.19177	0.0964554	1.27851	1.47944	25.1917
SBULL_12011.mrna1	81	hypothetical protein FF38_05687	2	C:GO:0016020; C:GO:0016021	C:membrane; C:integral component of membrane								19	0	0	2	0	0	0	3	8	2	0	0	1	0		30.1501	0	0	10.4642	0	0	0	8.72824	15.5205	6.93395	0	3.11133	3.46697	0
SBULL_12012.mrna1	437	uncharacterized protein LOC111687634	3	C:GO:0016020; C:GO:0016021; P:GO:0048515	C:membrane; C:integral component of membrane; P:spermatid differentiation						NP_609705.1 male sterile (2) 34Fe [Drosophila melanogaster]		276	2	0	14	0	0	0	157	89	36	8	12	37	1		23.1196	0.231427	0	2.17295	0	0	0	11.3652	6.77233	2.35325	0.739729	0.90508	1.891	0.191831
SBULL_12016.mrna1	141	GTP-binding protein 1	2	F:GO:0003924; F:GO:0005525	F:GTPase activity; F:GTP binding	EC:3.6.1.15	Nucleoside-triphosphate phosphatase				NP_725760.1 Dgp-1, isoform A [Drosophila melanogaster]		222	16	679	36	56	42	47	597	448	592	390	632	788	31		78.1752	8.8341	46.0782	25.6884	43.4373	19.7644	21.3383	210.932	184.722	203.715	172.07	290.627	202.511	27.3258
SBULL_12023.mrna1	128	Ca(2+)/calmodulin-responsive adenylate cyclase-like	7	F:GO:0000166; F:GO:0004016; C:GO:0005622; C:GO:0005886; P:GO:0006171; C:GO:0016021; P:GO:0035556	F:nucleotide binding; F:adenylate cyclase activity; C:intracellular; C:plasma membrane; P:cAMP biosynthetic process; C:integral component of membrane; P:intracellular signal transduction	EC:4.6.1.1	Adenylate cyclase				NP_511156.2 rutabaga, isoform A [Drosophila melanogaster]		2	2	159	4	3	1	4	47	31	49	39	54	54	3		0.874195	0.661739	10.9894	2.7304	0.941142	0.592793	1.16749	17.4658	13.0358	16.8767	17.7341	25.0364	13.9491	2.90511
SBULL_12025.mrna1	988	DNA damage-binding protein 1	8	F:GO:0003676; C:GO:0005634; P:GO:0006281; P:GO:0007307; P:GO:0016567; P:GO:0035220; P:GO:0045732; P:GO:0050832	F:nucleic acid binding; C:nucleus; P:DNA repair; P:eggshell chorion gene amplification; P:protein ubiquitination; P:wing disc development; P:positive regulation of protein catabolic process; P:defense response to fungus						NP_650257.1 piccolo [Drosophila melanogaster]		757	1969	6943	252	465	341	320	1639	1345	1723	1977	1720	2269	589		23.6304	92.1918	47.3625	15.7773	31.9231	14.1806	12.9039	39.7381	36.9008	38.7181	58.6529	52.0289	38.2406	46.4858
SBULL_1203.mrna1	1920	putative vitellogenin receptor isoform X1	2	F:GO:0005509; C:GO:0016021	F:calcium ion binding; C:integral component of membrane						NP_996433.1 yolkless, isoform B [Drosophila melanogaster]		3	32274	145361	3	10835	6	315	0	5	12	3	1	1	11		0.0311174	752.419	498.435	0.0934835	370.96	0.124657	6.32314	0	0.0681429	0.133952	0.0442121	0.0150263	0.00837197	0.435043
SBULL_12032.mrna1	99	matrix metalloproteinase-19 isoform X1	3	F:GO:0008237; C:GO:0016020; F:GO:0046872	F:metallopeptidase activity; C:membrane; F:metal ion binding								140	50	36	53	48	121	317	25	25	34	116	31	90	3		31.1301	10.6887	5.25619	40.176	64.1176	28.8631	88.7906	25.5104	27.3067	26.2	114.739	42.1502	51.2816	4.63705
SBULL_12035.mrna1	1154	Transient-receptor-potential-like protein	16	F:GO:0005262; F:GO:0005516; C:GO:0005622; P:GO:0007589; P:GO:0007603; P:GO:0007605; F:GO:0010461; C:GO:0016027; P:GO:0019722; C:GO:0030425; C:GO:0034703; C:GO:0035997; F:GO:0042802; F:GO:0046982; P:GO:0070588; P:GO:0071454	F:calcium channel activity; F:calmodulin binding; C:intracellular; P:body fluid secretion; P:phototransduction, visible light; P:sensory perception of sound; F:light-activated ion channel activity; C:inaD signaling complex; P:calcium-mediated signaling; C:dendrite; C:cation channel complex; C:rhabdomere microvillus membrane; F:identical protein binding; F:protein heterodimerization activity; P:ca…						NP_724823.2 transient receptor potential-like, isoform D [Drosophila melanogaster]		10	0	96	2294	1214	7	6	3	0	11	4	1	3	50		0.264712	0	0.556197	120.786	70.4389	0.247535	0.205095	0.0616176	0	0.2094	0.100531	0.0256254	0.0428318	3.35182
SBULL_12046.mrna1	223	late embryogenesis abundant protein ECP63 isoform X1									NP_610518.1 uncharacterized protein Dmel_CG1648, isoform A [Drosophila melanogaster]		1884	1280	5022	2080	2472	4789	6744	3866	2926	6874	3975	3223	4557	1850		276.048	288.796	183.517	654.498	722.705	1008.07	1459.44	554.083	474.539	913.111	697.116	576.317	453.998	794.657
SBULL_12051.mrna1	1247	centrosomal protein of 131 kDa	12	C:GO:0000242; P:GO:0007288; P:GO:0008344; P:GO:0035735; C:GO:0035869; C:GO:0036064; P:GO:0048935; C:GO:0061822; P:GO:0097711; P:GO:1904491; P:GO:1905349; P:GO:1905515	C:pericentriolar material; P:sperm axoneme assembly; P:adult locomotory behavior; P:intraciliary transport involved in cilium assembly; C:ciliary transition zone; C:ciliary basal body; P:peripheral nervous system neuron development; C:ciliary cap; P:ciliary basal body-plasma membrane docking; P:protein localization to ciliary transition zone; P:ciliary transition zone assembly; P:non-motile ciliu…						NP_610519.2 dilatory, isoform C [Drosophila melanogaster]		742	70	241	24	22	6	13	163	90	61	39	70	128	6		17.8563	2.52427	1.28963	1.17349	1.02193	0.195508	0.377939	3.0838	1.92675	1.06962	0.902854	1.65228	1.68333	0.37092
SBULL_12060.mrna1	1173	AF4/FMR2 family member 4	3	F:GO:0005267; P:GO:0006811; C:GO:0016021	F:potassium channel activity; P:ion transport; C:integral component of membrane						NP_610516.1 uncharacterized protein Dmel_CG1688 [Drosophila melanogaster]		0	1	120	23	12	2	8	34	29	86	59	27	62	17		0	0.0390214	0.673305	1.19967	0.688347	0.0695137	0.268774	0.686325	0.66242	1.60898	1.45733	0.679989	0.86997	1.1203
SBULL_12079.mrna1	1023	alpha-amylase 4N-like	3	F:GO:0004553; P:GO:0008152; C:GO:0016020	F:hydrolase activity, hydrolyzing O-glycosyl compounds; P:metabolic process; C:membrane						NP_536346.1 amylase proximal, isoform A [Drosophila melanogaster]		0	6	2	5	4	2	7	1	1	0	0	1	0	0		0	0.270693	0.0133025	0.30161	0.265195	0.0803742	0.271969	0.0233567	0.02643	0	0	0.0291407	0	0
SBULL_12094.mrna1	535	zinc finger protein 350	1	F:GO:0003676	F:nucleic acid binding						NP_610521.1 uncharacterized protein Dmel_CG1663 [Drosophila melanogaster]		56	509	1636	38	146	103	143	169	179	218	314	298	353	67		3.42176	46.4983	21.2413	4.54671	19.4934	8.33635	11.2356	8.07243	9.6751	9.65106	18.3528	17.7591	11.7207	10.2457
SBULL_121.mrna1	58	---NA---											0	0	6	0	0	0	0	53	405	1	8	0	193	0		0	0	0	0	0	0	0	209.953	1815.46	3.67153	38.7785	0	531.454	0
SBULL_12104.mrna1	125	NADH dehydrogenase [ubiquinone] 1 alpha subcomplex subunit 6	4	C:GO:0005747; P:GO:0006120; P:GO:0006979; F:GO:0008137	C:mitochondrial respiratory chain complex I; P:mitochondrial electron transport, NADH to ubiquinone; P:response to oxidative stress; F:NADH dehydrogenase (ubiquinone) activity	EC:1.6.99.5; EC:1.6.99.3; EC:1.6.5.3	Acting on NADH or NADPH; NADH dehydrogenase; NADH:ubiquinone reductase (H(+)-translocating)				NP_610629.1 NADH dehydrogenase (ubiquinone) B14 subunit, isoform A [Drosophila melanogaster]		355	110	1606	835	625	862	951	170	134	281	127	100	179	666		59.5221	34.6754	150.593	311.407	417.511	111.237	82.0799	176.312	128.288	247.11	135.856	116.083	119.026	699.322
SBULL_12110.mrna1	114	---NA---											7	1	110	1	25	0	0	5	3	5	1	1	4	0		2.21776	0.841671	8.69352	1.16733	23.7185	0	0	2.40817	1.63502	2.23197	0.589348	0.600904	1.33918	0
SBULL_12114.mrna1	1466	zinc finger protein OZF-like	1	F:GO:0003676	F:nucleic acid binding								964	175	4037	109	166	116	170	723	580	470	635	592	864	173		19.848	5.40313	18.3354	4.49682	7.53755	3.18985	4.51768	11.5356	10.4717	6.95026	12.3974	11.7845	9.58249	9.03862
SBULL_12115.mrna1	1031	putative zinc finger protein 66	1	F:GO:0003676	F:nucleic acid binding						NP_572657.2 uncharacterized protein Dmel_CG2202 [Drosophila melanogaster]		670	1001	2100	77	126	103	160	492	370	410	429	353	622	124		18.4653	41.4766	13.2721	4.36706	7.8903	3.46739	4.81641	11.396	9.69785	8.80184	12.1591	10.2012	10.0148	9.35671
SBULL_12133.mrna1	1792	zinc finger protein 624-like isoform X1	1	F:GO:0003676	F:nucleic acid binding						NP_610628.2 uncharacterized protein Dmel_CG12942 [Drosophila melanogaster]		383	324	3776	60	353	130	249	384	368	434	480	423	678	103		6.03222	7.86734	13.8079	2.0082	12.7534	2.78927	4.78644	4.96822	5.38769	5.20428	7.59916	6.82807	6.09764	4.37323
SBULL_12142.mrna1	52	---NA---											0	1	12	0	0	0	0	9	3	6	11	4	14	0		0	269.282	16.954	0	0	0	0	53.7739	20.2831	33.2262	80.4223	29.8179	58.1459	0
SBULL_12157.mrna1	315	KH domain-containing, RNA-binding, signal transduction-associated protein 2	5	P:GO:0000381; F:GO:0003677; F:GO:0003723; P:GO:0006915; C:GO:0016607	P:regulation of alternative mRNA splicing, via spliceosome; F:DNA binding; F:RNA binding; P:apoptotic process; C:nuclear speck						NP_477306.3 quaking related 58E-3, isoform B [Drosophila melanogaster]		1039	1527	10583	774	1954	807	933	2979	2720	3849	5137	3945	6231	1283		129.168	288.332	304.504	185.328	446.894	137.444	154.765	414.737	428.529	477.726	845.447	676.211	603.771	437.713
SBULL_12163.mrna1	455	E3 ubiquitin-protein ligase RNF12-B	1	P:GO:0008340	P:determination of adult lifespan						NP_724830.1 hebe, isoform E [Drosophila melanogaster]		300	308	2327	468	1256	673	541	188	156	182	136	259	407	1138		22.061	34.0052	36.7359	69.2907	202.258	66.2264	51.5683	10.8365	10.1751	9.72307	9.59234	18.626	16.3075	208.557
SBULL_12169.mrna1	811	monocarboxylate transporter 9 isoform X1	1	C:GO:0016020	C:membrane						NP_001163151.1 uncharacterized protein Dmel_CG12866, isoform C [Drosophila melanogaster]		312	0	2	16	0	0	0	103	49	39	0	5	29	0		11.8861	0	0.0170584	1.16179	0	0	0	3.09221	1.66461	1.08517	0	0.187279	0.60519	0
SBULL_12180.mrna1	488	uncharacterized protein LOC111679016									NP_610495.1 uncharacterized protein Dmel_CG1888, isoform A [Drosophila melanogaster]		5	5	196	6	2	11	19	31	50	37	66	66	69	7		0.33921	0.509217	2.81399	0.819126	0.298412	0.998419	1.67007	1.64646	3.005	1.82134	4.28931	4.37342	2.54742	1.1858
SBULL_12190.mrna1	313	lambda-crystallin homolog	6	F:GO:0003857; C:GO:0005623; P:GO:0006631; C:GO:0016021; P:GO:0045454; P:GO:0055114	F:3-hydroxyacyl-CoA dehydrogenase activity; C:cell; P:fatty acid metabolic process; C:integral component of membrane; P:cell redox homeostasis; P:oxidation-reduction process	EC:1.1.1.35	3-hydroxyacyl-CoA dehydrogenase				NP_610974.1 uncharacterized protein Dmel_CG10131 [Drosophila melanogaster]		46	204	67	134	108	238	471	61	85	99	397	611	1078	145		5.29534	35.2913	1.5956	30.9427	27.2681	36.7185	70.5183	5.55433	8.75802	8.35484	44.2331	69.4114	68.2312	41.0227
SBULL_12196.mrna1	523	uncharacterized protein LOC111683107	1	P:GO:1901739	P:regulation of myoblast fusion						NP_725407.1 M-spondin, isoform A [Drosophila melanogaster]		9	14	732	113	69	177	195	175	184	317	259	144	255	112		0.564237	1.22333	9.79601	13.4927	8.96497	14.424	15.5891	8.5795	10.2077	14.404	15.5374	8.80794	8.69013	17.5634
SBULL_12198.mrna1	59	---NA---											0	0	28	0	1	1	2	6	6	12	6	5	13	1		0	0	12.0081	0	52.1787	0	0	22.3157	25.2519	41.3657	27.3064	23.2015	33.6096	6.0535
SBULL_12206.mrna1	595	glycerol kinase	5	P:GO:0005975; C:GO:0016021; F:GO:0016301; P:GO:0016310; F:GO:0016773	P:carbohydrate metabolic process; C:integral component of membrane; F:kinase activity; P:phosphorylation; F:phosphotransferase activity, alcohol group as acceptor						NP_725098.2 uncharacterized protein Dmel_CG8298, isoform C [Drosophila melanogaster]		61	47	1366	43	134	43	54	163	96	145	146	165	200	153		3.19935	3.49927	15.4819	4.35946	14.5613	2.75549	3.36864	6.89933	4.59807	5.68838	7.56183	8.71347	5.88453	20.8123
SBULL_12213.mrna1	248	trypsin eta-like	2	F:GO:0004252; P:GO:0006508	F:serine-type endopeptidase activity; P:proteolysis	EC:3.4.21	Acting on peptide bonds (peptidases)				NP_610674.5 kappaTry [Drosophila melanogaster]		60	29	89	156	293	45	1	41	14	15	0	0	9	578		9.31888	6.77502	2.79539	48.5177	99.5783	9.38072	0.202664	5.08165	1.96351	1.72311	0	0	0.7754	217.336
SBULL_12217.mrna1	652	GATA zinc finger domain-containing protein 14	5	F:GO:0008083; P:GO:0010469; P:GO:0016477; P:GO:0022008; P:GO:0048513	F:growth factor activity; P:regulation of signaling receptor activity; P:cell migration; P:neurogenesis; P:animal organ development						NP_001097275.1 pyramus [Drosophila melanogaster]		82	41	670	59	73	62	39	75	44	98	104	68	100	107		3.96809	2.64634	6.95758	5.31431	7.2266	3.60231	2.47162	2.86467	2.11785	3.7525	5.28138	3.38345	2.73472	13.1727
SBULL_12233.mrna1	379	meiosis-specific nuclear structural protein 1-like									NP_995823.1 uncharacterized protein Dmel_CG13168, isoform C [Drosophila melanogaster]		994	6	22	51	16	0	3	572	265	154	36	60	205	0		77.9504	0.820653	0.441402	7.34551	3.00011	0	0.35462	40.9848	21.4861	10.227	3.15634	5.36372	10.2104	0
SBULL_12237.mrna1	632	WD and tetratricopeptide repeats protein 1	1	P:GO:0010883	P:regulation of lipid storage						NP_611296.2 adipose, isoform A [Drosophila melanogaster]		448	244	2784	215	278	238	321	1127	1096	1222	1123	970	1711	107		22.1084	17.9575	29.6884	21.2932	28.243	15.5936	20.3382	44.5731	49.0506	44.7941	54.348	47.8639	47.0393	13.6268
SBULL_12238.mrna1	543	ankyrin repeat domain-containing protein 13C	4	F:GO:0005102; C:GO:0005783; P:GO:0006621; P:GO:0010869	F:signaling receptor binding; C:endoplasmic reticulum; P:protein retention in ER lumen; P:regulation of receptor biosynthetic process						NP_001261069.1 uncharacterized protein Dmel_CG5742, isoform C [Drosophila melanogaster]		0	0	0	0	0	0	0	0	0	0	0	0	0	0		2.40348	8.92838	6.94986	2.4166	6.08164	1.92881	2.33405	5.2127	6.27057	3.78669	5.45907	6.44497	3.88463	4.06161
SBULL_12251.mrna1	413	gustatory receptor 10a	4	C:GO:0005886; P:GO:0007165; C:GO:0016021; P:GO:0050909	C:plasma membrane; P:signal transduction; C:integral component of membrane; P:sensory perception of taste						NP_727523.1 gustatory receptor 10a [Drosophila melanogaster]		0	6	23	0	3	0	1	19	19	18	23	22	42	1		0	0.741822	0.344839	0	0.361845	0	0.106798	1.22852	1.39017	1.0787	1.81975	1.77476	1.88773	0.204579
SBULL_12252.mrna1	1366	polycomb protein Pcl	7	F:GO:0003677; F:GO:0003682; F:GO:0003700; C:GO:0005634; F:GO:0035064; P:GO:0045892; P:GO:0050832	F:DNA binding; F:chromatin binding; F:DNA-binding transcription factor activity; C:nucleus; F:methylated histone binding; P:negative regulation of transcription, DNA-templated; P:defense response to fungus						NP_476672.1 polycomblike, isoform A [Drosophila melanogaster]		2746	1183	12336	156	456	223	285	820	579	582	771	823	956	149		59.765	38.4962	59.9296	6.7526	21.118	6.51398	8.04107	14.0913	11.259	9.26957	16.2123	17.6451	11.4197	8.37708
SBULL_12253.mrna1	488	hypothetical protein FF38_12318									NP_609652.3 uncharacterized protein Dmel_CG7110, isoform B [Drosophila melanogaster]		96	4409	1565	50	412	173	107	251	231	318	427	387	611	70		6.30931	430.492	23.0358	6.41648	60.7268	15.0671	9.40512	13.331	13.8831	15.6537	27.7506	25.6441	22.5576	11.858
SBULL_12254.mrna1	245	uncharacterized protein PFB0145c									NP_609652.3 uncharacterized protein Dmel_CG7110, isoform B [Drosophila melanogaster]		43	2754	673	18	133	80	64	106	84	115	138	164	241	24		5.20934	549.962	22.1025	4.484	41.0995	13.9851	10.5073	13.3607	11.9808	13.4345	21.2841	25.7901	21.1155	9.18038
SBULL_12256.mrna1	64	uncharacterized protein PFB0145c									NP_609652.3 uncharacterized protein Dmel_CG7110, isoform B [Drosophila melanogaster]		4	126	25	4	8	0	1	18	9	18	8	18	18	0		35.0977	2039.11	1.80197	53.5305	122.135	0	21.1675	49.8428	28.2005	46.1959	27.1066	62.1856	34.6469	0
SBULL_12268.mrna1	42	---NA---											0	1	2	0	0	0	0	2	2	0	2	8	6	0		0	0	0	0	0	0	0	27.8056	31.4642	0	34.0241	138.765	57.985	0
SBULL_12276.mrna1	647	polyadenylate-binding protein	11	F:GO:0003730; C:GO:0005737; P:GO:0007112; P:GO:0007268; P:GO:0007289; P:GO:0009953; P:GO:0045314; P:GO:0045727; P:GO:0048599; P:GO:1901215; C:GO:1990904	F:mRNA 3'-UTR binding; C:cytoplasm; P:male meiosis cytokinesis; P:chemical synaptic transmission; P:spermatid nucleus differentiation; P:dorsal/ventral pattern formation; P:regulation of compound eye photoreceptor development; P:positive regulation of translation; P:oocyte development; P:negative regulation of neuron death; C:ribonucleoprotein complex						NP_725750.1 poly(A) binding protein, isoform C [Drosophila melanogaster]		66499	11701	118485	15877	14509	16515	9385	49194	51321	51866	32843	33595	51910	22714		3169.73	820.712	1246.81	1515.77	1511.81	1070.99	589.264	1895.22	2237.32	1851.96	1548.27	1614.77	1390.15	2818.43
SBULL_12282.mrna1	96	essential MCU regulator, mitochondrial	3	P:GO:0036444; P:GO:0051560; C:GO:1990246	P:calcium import into the mitochondrion; P:mitochondrial calcium ion homeostasis; C:uniplex complex						NP_611294.1 essential MCU regulator [Drosophila melanogaster]		109	35	392	102	150	95	100	202	160	320	147	133	317	59		10.159	5.17597	35.6054	21.9967	46.3233	9.32682	2.34108	151.59	135.87	222.572	134.987	124.526	165.364	95.4224
SBULL_12283.mrna1	270	myeloid leukemia factor isoform X3									NP_523753.1 Myelodysplasia/myeloid leukemia factor, isoform A [Drosophila melanogaster]		5664	1593	5131	733	778	850	1394	1935	1369	1576	1158	1139	1854	280		509.617	238.924	146.052	165.701	194.095	100.796	160.91	213.704	171.088	161.32	156.493	156.943	142.332	94.8304
SBULL_12284.mrna1	251	thioredoxin domain-containing protein 15	6	F:GO:0003857; C:GO:0005623; P:GO:0006631; C:GO:0016021; P:GO:0045454; P:GO:0055114	F:3-hydroxyacyl-CoA dehydrogenase activity; C:cell; P:fatty acid metabolic process; C:integral component of membrane; P:cell redox homeostasis; P:oxidation-reduction process	EC:1.1.1.35	3-hydroxyacyl-CoA dehydrogenase				NP_611065.1 bunker gear [Drosophila melanogaster]		690	89	1291	103	74	152	180	281	173	225	213	174	263	81		90.0293	18.3922	38.2519	23.5587	21.7435	27.6933	33.3014	34.2568	23.8656	25.4229	31.7742	26.4654	22.2874	30.0503
SBULL_12285.mrna1	178	myeloid leukemia factor isoform X1									NP_725501.2 Myelodysplasia/myeloid leukemia factor, isoform C [Drosophila melanogaster]		816	713	1908	239	625	422	397	644	455	720	538	508	789	106		138.901	242.025	80.674	86.5822	197.744	128.403	117.831	130.632	104.438	135.362	133.536	128.562	111.25	62.0763
SBULL_12291.mrna1	48	---NA---											9	4	363	6	115	4	0	215	147	223	152	128	283	8		0	0	219.649	0	0	0	0	1751.38	1355.02	1683.63	1515.1	1300.89	1602.47	116.207
SBULL_12298.mrna1	924	transmembrane protease serine 9-like	2	F:GO:0004252; P:GO:0006508	F:serine-type endopeptidase activity; P:proteolysis	EC:3.4.21	Acting on peptide bonds (peptidases)				NP_523518.2 trypsin 29F, isoform C [Drosophila melanogaster]		7	70	403	668	1483	67	4	44	38	109	77	56	106	3225		0.234732	3.521	2.98023	44.8691	109.515	3.0021	0.173305	1.14656	1.1205	2.63252	2.45521	1.82062	1.92005	273.205
SBULL_123.mrna1	328	uncharacterized protein LOC111684314	1	C:GO:0016021	C:integral component of membrane						NP_649631.1 osiris 12 [Drosophila melanogaster]		0	1	857	25	24	24	2	2742	8930	2343	255	35	706	7		0	0.163222	19.9399	5.26582	5.48186	3.49319	0.282415	235.351	867.016	186.322	26.8773	3.74668	42.167	1.87283
SBULL_1230.mrna1	252	cuticle protein 16.5	1	F:GO:0042302	F:structural constituent of cuticle						NP_650744.1 mucin 91C, isoform A [Drosophila melanogaster]		1	0	0	0	7	3	0	0	4	23	0	0	0	296		0.152047	0	0	0	0.665542	0.612152	0	0	0.548806	2.58465	0	0	0	108.527
SBULL_12303.mrna1	244	trypsin alpha-3	2	F:GO:0004252; P:GO:0006508	F:serine-type endopeptidase activity; P:proteolysis	EC:3.4.21	Acting on peptide bonds (peptidases)				NP_611066.1 uncharacterized protein Dmel_CG8299 [Drosophila melanogaster]		44	1	2	110	165	9	0	3	0	4	0	0	3	1		6.66647	0.238771	0.0696636	28.3421	38.1978	1.49146	0	0.380281	0	0.469942	0	0	0.264342	0.384506
SBULL_12305.mrna1	261	trypsin eta	5	F:GO:0004252; F:GO:0005509; P:GO:0006508; P:GO:0007596; C:GO:0016020	F:serine-type endopeptidase activity; F:calcium ion binding; P:proteolysis; P:blood coagulation; C:membrane	EC:3.4.21	Acting on peptide bonds (peptidases)				NP_610674.5 kappaTry [Drosophila melanogaster]		0	10	7	100	205	10	1	4	0	2	0	2	0	125		0	2.1832	0.223187	28.2442	52.4466	1.9478	0.189278	0.46237	0	0.21427	0	0.288435	0	43.4502
SBULL_12306.mrna1	883	putative ATP-dependent RNA helicase DHX35	4	F:GO:0000166; F:GO:0004386; C:GO:0016021; F:GO:0016740	F:nucleotide binding; F:helicase activity; C:integral component of membrane; F:transferase activity	EC:3.6.1.15	Nucleoside-triphosphate phosphatase				NP_477376.1 uncharacterized protein Dmel_CG4585, isoform A [Drosophila melanogaster]		55	342	417	70	76	61	87	175	123	144	117	168	318	88		14.0125	27.4102	9.80643	14.5517	19.6276	11.7619	10.828	14.0951	12.6359	13.8248	14.5347	17.6197	15.2199	18.6677
SBULL_12320.mrna1	436	tubulin beta-1 chain	7	F:GO:0003924; F:GO:0005200; F:GO:0005525; C:GO:0005737; C:GO:0005874; P:GO:0007010; P:GO:0007017	F:GTPase activity; F:structural constituent of cytoskeleton; F:GTP binding; C:cytoplasm; C:microtubule; P:cytoskeleton organization; P:microtubule-based process	EC:3.6.1.15	Nucleoside-triphosphate phosphatase				NP_523795.2 beta-Tubulin at 56D, isoform B [Drosophila melanogaster]		12396	54066	171233	19154	27670	24985	15182	187592	153217	216515	177343	119946	219197	22946		946.185	6212.23	2839.52	2948.39	4594.62	2566.68	1515.09	11371.4	10509.7	12164.3	13154.4	9071.31	9236.28	4409.75
SBULL_12329.mrna1	568	TAR DNA-binding protein 43	1	F:GO:0003723	F:RNA binding						NP_726373.1 TAR DNA-binding protein-43 homolog, isoform D [Drosophila melanogaster]		166	164	1701	108	244	202	237	716	702	947	991	988	1476	245		8.22514	12.173	20.3655	9.87543	29.1626	13.4445	15.2319	31.9429	35.4392	39.1573	54.0991	54.9929	45.7731	35.0703
SBULL_12335.mrna1	205	desumoylating isopeptidase 2	3	F:GO:0003674; C:GO:0005575; P:GO:0008150	F:molecular_function; C:cellular_component; P:biological_process						NP_610613.1 uncharacterized protein Dmel_CG7222, isoform A [Drosophila melanogaster]		657	382	905	109	199	192	267	435	327	397	440	338	550	35		42.0102	40.753	35.3223	15.6352	29.9719	16.5644	20.3704	70.8423	60.2609	59.9232	87.682	68.6764	62.2627	16.8845
SBULL_1234.mrna1	337	cuticle protein 16.5	3	F:GO:0003674; C:GO:0005575; P:GO:0008150	F:molecular_function; C:cellular_component; P:biological_process						NP_727758.1 uncharacterized protein Dmel_CG32603 [Drosophila melanogaster]		36	11	0	1	1	84	17	3	3	7	0	2	3	0		3.46746	1.26296	0	0.212163	0.230593	10.9801	2.32134	0.248789	0.375365	0.614894	0	0.206932	0.230585	0
SBULL_12342.mrna1	383	guanine nucleotide-binding protein G(s) subunit alpha	13	F:GO:0003924; F:GO:0005525; C:GO:0005604; C:GO:0005834; P:GO:0007186; P:GO:0007268; P:GO:0007476; P:GO:0007528; P:GO:0010353; F:GO:0031683; F:GO:0046872; P:GO:0050916; P:GO:2000253	F:GTPase activity; F:GTP binding; C:basement membrane; C:heterotrimeric G-protein complex; P:G-protein coupled receptor signaling pathway; P:chemical synaptic transmission; P:imaginal disc-derived wing morphogenesis; P:neuromuscular junction development; P:response to trehalose; F:G-protein beta/gamma-subunit complex binding; F:metal ion binding; P:sensory perception of sweet taste; P:positive re…	EC:3.6.1.15	Nucleoside-triphosphate phosphatase				NP_726388.1 G protein alpha s subunit, isoform C [Drosophila melanogaster]		372	305	4132	313	559	613	487	2099	1891	2508	2142	2002	3476	474		31.2383	38.1294	77.5978	54.6387	102.427	69.7925	53.7497	164.793	166.282	180.959	202.861	191.995	186.571	106.647
SBULL_12346.mrna1	1241	benign gonial cell neoplasm protein	1	F:GO:0004386	F:helicase activity	EC:3.6.1.15	Nucleoside-triphosphate phosphatase				NP_001286787.1 benign gonial cell neoplasm, isoform B [Drosophila melanogaster]		69	65	784	8	22	1	3	46	31	21	6	8	15	25		1.69175	2.3165	4.15972	0.39316	1.1893	0.0327507	0.0949664	0.874726	0.667053	0.370113	0.139611	0.189798	0.198275	1.5533
SBULL_12349.mrna1	953	serine/threonine-protein kinase MARK2 isoform X1	8	P:GO:0000226; P:GO:0000737; F:GO:0003677; F:GO:0004674; F:GO:0005524; C:GO:0005694; P:GO:0006468; P:GO:0030010	P:microtubule cytoskeleton organization; P:DNA catabolic process, endonucleolytic; F:DNA binding; F:protein serine/threonine kinase activity; F:ATP binding; C:chromosome; P:protein phosphorylation; P:establishment of cell polarity	EC:2.7.11	Transferring phosphorus-containing groups				NP_995894.2 par-1, isoform X [Drosophila melanogaster]		1208	4763	13727	1075	1529	2105	4324	3707	3784	4410	3986	3756	4877	1207		36.3024	218.005	96.3582	63.0571	99.4521	82.8806	163.292	93.4321	107.922	103.018	122.932	118.11	85.4454	98.9603
SBULL_12361.mrna1	973	serine-rich adhesin for platelets	7	P:GO:0007498; P:GO:0007523; P:GO:0007526; F:GO:0008083; P:GO:0010469; P:GO:0021782; P:GO:0051451	P:mesoderm development; P:larval visceral muscle development; P:larval somatic muscle development; F:growth factor activity; P:regulation of signaling receptor activity; P:glial cell development; P:myoblast migration						NP_001246268.1 thisbe, isoform B [Drosophila melanogaster]		74	50	833	94	48	64	98	204	137	197	82	63	99	39		2.348	2.37965	5.75978	5.98234	3.2168	2.71328	4.01705	5.02803	3.82097	4.50023	2.47307	1.9373	1.69615	3.12813
SBULL_12374.mrna1	706	exostosin-2	16	C:GO:0000139; F:GO:0005515; C:GO:0005789; P:GO:0006044; P:GO:0006486; P:GO:0007275; P:GO:0015014; C:GO:0016021; P:GO:0030206; P:GO:0030210; P:GO:0045880; F:GO:0046872; F:GO:0050508; F:GO:0050509; P:GO:0090098; P:GO:0090263	C:Golgi membrane; F:protein binding; C:endoplasmic reticulum membrane; P:N-acetylglucosamine metabolic process; P:protein glycosylation; P:multicellular organism development; P:heparan sulfate proteoglycan biosynthetic process, polysaccharide chain biosynthetic process; C:integral component of membrane; P:chondroitin sulfate biosynthetic process; P:heparin biosynthetic process; P:positive regulat…	EC:2.4.1.17; EC:2.4.1.225; EC:2.4.1.224	Glucuronosyltransferase; N-acetylglucosaminyl-proteoglycan 4-beta-glucuronosyltransferase; Glucuronosyl-N-acetylglucosaminyl-proteoglycan 4-alpha-N-				NP_725536.1 Ext2 [Drosophila melanogaster]		1098	287	3149	288	384	316	362	1625	1240	1497	1725	1783	2727	366		48.0236	18.1147	30.1837	25.0559	36.8678	18.419	20.4891	56.8142	49.058	48.5095	73.7985	77.7755	66.2752	41.3384
SBULL_12380.mrna1	95	paired mesoderm homeobox protein 2B	3	C:GO:0005634; P:GO:0006355; F:GO:0043565	C:nucleus; P:regulation of transcription, DNA-templated; F:sequence-specific DNA binding						NP_523834.1 putative homeodomain protein [Drosophila melanogaster]		0	1	1	0	2	0	0	0	1	0	2	1	1	0		0	1.33381	0.175522	0	0	0	0	0	0.874492	0	1.89128	0.964182	0.537197	0
SBULL_12381.mrna1	697	dynein regulatory complex protein 1 homolog	3	F:GO:0003674; C:GO:0005575; P:GO:0008150	F:molecular_function; C:cellular_component; P:biological_process						NP_572445.1 uncharacterized protein Dmel_CG10958 [Drosophila melanogaster]		4714	1	8	160	0	2	0	1204	519	421	1	67	399	0		214.48	0.068296	0.0804474	14.6259	0	0.121697	0	42.6973	20.827	13.8375	0.0433939	2.9644	9.83579	0
SBULL_12388.mrna1	828	catenin delta-2	10	P:GO:0001745; C:GO:0005737; C:GO:0005813; C:GO:0005913; P:GO:0010172; P:GO:0032956; P:GO:0034334; F:GO:0045296; P:GO:0060997; P:GO:0098609	P:compound eye morphogenesis; C:cytoplasm; C:centrosome; C:cell-cell adherens junction; P:embryonic body morphogenesis; P:regulation of actin cytoskeleton organization; P:adherens junction maintenance; F:cadherin binding; P:dendritic spine morphogenesis; P:cell-cell adhesion						NP_001036444.1 adherens junction protein p120 [Drosophila melanogaster]		796	2501	2537	170	333	242	364	571	490	570	721	681	870	182		42.414	196.827	34.504	17.6446	31.6749	15.6332	23.4105	38.5951	39.1566	37.8658	59.6887	58.8817	42.4358	29.8906
SBULL_12389.mrna1	363	Ceramide phosphoethanolamine synthase	2	C:GO:0016021; F:GO:0016740	C:integral component of membrane; F:transferase activity						NP_477376.1 uncharacterized protein Dmel_CG4585, isoform A [Drosophila melanogaster]		175	96	355	91	129	73	38	65	55	97	66	115	113	38		46.0813	31.2936	21.6532	39.1244	63.6601	30.7291	22.1909	26.4668	23.5316	29.927	33.6814	35.0022	24.8632	32.7685
SBULL_1239.mrna1	373	glycosyltransferase-like domain-containing protein 1-like	1	F:GO:0016740	F:transferase activity						NP_573084.1 uncharacterized protein Dmel_CG15914 [Drosophila melanogaster]		91	587	733	18	92	19	41	147	183	172	179	148	251	61		8.54838	83.8788	17.5017	3.74815	19.7935	2.61297	4.94587	20.7717	25.7395	23.1158	27.7441	25.0943	22.0143	15.8741
SBULL_1240.mrna1	298	CAAX prenyl protease 2	3	P:GO:0006508; F:GO:0008233; C:GO:0016021	P:proteolysis; F:peptidase activity; C:integral component of membrane						NP_524673.3 severas [Drosophila melanogaster]		65	24	575	31	33	18	19	160	119	144	121	106	209	36		9.42699	5.15246	16.8276	9.16103	10.7363	3.44659	3.34583	22.6966	22.6098	20.137	21.0074	22.5084	21.5079	11.4059
SBULL_12409.mrna1	1006	focal adhesion kinase 1 isoform X1	6	F:GO:0004713; F:GO:0005524; C:GO:0005856; C:GO:0005925; P:GO:0007172; P:GO:0018108	F:protein tyrosine kinase activity; F:ATP binding; C:cytoskeleton; C:focal adhesion; P:signal complex assembly; P:peptidyl-tyrosine phosphorylation	EC:2.7.10	Transferring phosphorus-containing groups				NP_001137718.1 focal adhesion kinase, isoform D [Drosophila melanogaster]		926	805	3214	298	390	426	571	1383	1341	1542	1112	1074	1968	501		28.2323	36.7427	20.8473	18.1163	26.0513	17.3056	22.5458	32.8878	36.085	33.9859	32.3573	31.8643	32.5312	38.4849
SBULL_12410.mrna1	840	alpha-catulin	5	C:GO:0005622; P:GO:0007155; P:GO:0007266; F:GO:0045296; F:GO:0051015	C:intracellular; P:cell adhesion; P:Rho protein signal transduction; F:cadherin binding; F:actin filament binding						NP_726389.4 alpha-catenin related, isoform C [Drosophila melanogaster]		33	47	1119	84	298	190	378	37	43	54	52	53	117	86		1.22605	2.61952	9.17282	6.26272	24.3115	9.43369	18.1506	1.06906	1.4059	1.4461	1.83849	1.91058	2.34991	7.9682
SBULL_12411.mrna1	376	focal adhesion kinase 1 isoform X1	7	F:GO:0004713; F:GO:0005524; C:GO:0005856; C:GO:0005925; P:GO:0007172; P:GO:0018108; P:GO:0048523	F:protein tyrosine kinase activity; F:ATP binding; C:cytoskeleton; C:focal adhesion; P:signal complex assembly; P:peptidyl-tyrosine phosphorylation; P:negative regulation of cellular process	EC:2.7.10	Transferring phosphorus-containing groups				NP_001163207.1 focal adhesion kinase, isoform F [Drosophila melanogaster]		265	366	1213	73	99	95	201	534	478	553	407	316	741	141		23.7437	50.1774	23.2965	13.549	19.6055	11.5841	23.5357	38.6762	39.1756	37.1218	36.0705	28.5547	37.3064	32.1381
SBULL_12426.mrna1	346	WD repeat-containing protein 47									NP_611850.1 uncharacterized protein Dmel_CG2812 [Drosophila melanogaster]		126	148	1460	157	256	180	202	1472	1405	1784	1303	1550	2338	47		12.8201	22.4702	31.2078	31.834	56.5031	24.3967	26.1733	118.12	127.578	132.682	127.942	155.179	130.413	11.8053
SBULL_12440.mrna1	208	60S ribosomal protein L11	7	C:GO:0000228; F:GO:0003723; F:GO:0003735; C:GO:0005703; C:GO:0005730; C:GO:0005840; P:GO:0006412	C:nuclear chromosome; F:RNA binding; F:structural constituent of ribosome; C:polytene chromosome puff; C:nucleolus; C:ribosome; P:translation						NP_477054.1 ribosomal protein L11, isoform A [Drosophila melanogaster]		4668	5911	54801	4571	11949	7838	3719	15851	15029	24466	17498	15554	27595	37699		887.25	1702.24	2193.08	1695.2	4028.44	2014.71	939.768	2526.1	2710.24	3613.74	3412.21	3092.59	3056.93	17826.3
SBULL_12443.mrna1	161	netrin-A isoform X1	2	C:GO:0005576; P:GO:0007411	C:extracellular region; P:axon guidance						NP_511154.3 Netrin-A, isoform A [Drosophila melanogaster]		9	36	64	12	15	21	16	24	25	17	55	20	42	16		2.6245	15.8402	3.99783	6.58903	9.49666	8.26057	6.15651	5.75854	6.78775	3.78051	16.148	5.98713	7.00507	10.8277
SBULL_12447.mrna1	462	protein virilizer	6	P:GO:0000381; C:GO:0005634; P:GO:0007298; P:GO:0007539; C:GO:0036396; P:GO:0080009	P:regulation of alternative mRNA splicing, via spliceosome; C:nucleus; P:border follicle cell migration; P:primary sex determination, soma; C:RNA N6-methyladenosine methyltransferase complex; P:mRNA methylation						NP_524900.1 virilizer [Drosophila melanogaster]		54	90	695	34	42	64	123	116	125	127	238	215	206	86		3.90152	9.76247	10.8846	4.79985	6.67213	6.18743	11.5181	6.68078	8.13642	6.7167	16.904	15.6108	8.30404	15.4919
SBULL_12448.mrna1	248	Protein virilizer	8	P:GO:0000381; F:GO:0005515; C:GO:0005634; P:GO:0007298; P:GO:0007539; P:GO:0007549; C:GO:0036396; P:GO:0080009	P:regulation of alternative mRNA splicing, via spliceosome; F:protein binding; C:nucleus; P:border follicle cell migration; P:primary sex determination, soma; P:dosage compensation; C:RNA N6-methyladenosine methyltransferase complex; P:mRNA methylation						NP_524900.1 virilizer [Drosophila melanogaster]		51	62	452	30	57	63	66	119	113	86	134	149	179	66		4.34881	8.87761	12.852	6.301	12.5747	5.41997	6.28258	14.7492	15.8484	9.87917	20.3227	23.0407	15.4218	24.4833
SBULL_12449.mrna1	92	protein virilizer	6	P:GO:0000381; C:GO:0005634; P:GO:0007298; P:GO:0007539; C:GO:0036396; P:GO:0080009	P:regulation of alternative mRNA splicing, via spliceosome; C:nucleus; P:border follicle cell migration; P:primary sex determination, soma; C:RNA N6-methyladenosine methyltransferase complex; P:mRNA methylation						NP_524900.1 virilizer [Drosophila melanogaster]		23	18	84	2	29	14	23	30	22	25	38	64	48	3		7.67039	2.93887	12.7206	4.19757	18.0493	7.95602	2.67726	25.4086	21.0847	19.6246	39.382	67.6281	28.2594	5.39548
SBULL_12450.mrna1	77	5-formyltetrahydrofolate cyclo-ligase	3	F:GO:0005524; F:GO:0030272; F:GO:0046872	F:ATP binding; F:5-formyltetrahydrofolate cyclo-ligase activity; F:metal ion binding	EC:6.3.3.2	5-formyltetrahydrofolate cyclo-ligase				NP_001286765.1 uncharacterized protein Dmel_CG34424, isoform B [Drosophila melanogaster]		8	95	48	24	80	12	30	24	23	45	29	20	68	2		9.51547	131.432	11.5062	55.0597	147.786	30.0367	43.4249	35.2344	38.2092	61.2307	52.0965	36.6331	69.3948	5.44162
SBULL_12455.mrna1	45	---NA---											0	0	0	0	0	0	0	0	0	0	0	0	0	0		0	0	0	0	0	0	0	63.1018	11.9008	19.4949	38.607	13.1213	36.553	0
SBULL_12458.mrna1	145	fibrinogen C domain-containing protein 1 isoform X1	4	F:GO:0001664; P:GO:0007186; F:GO:0008061; C:GO:0016020	F:G-protein coupled receptor binding; P:G-protein coupled receptor signaling pathway; F:chitin binding; C:membrane						NP_001137882.1 uncharacterized protein Dmel_CG10359, isoform E [Drosophila melanogaster]		5	23	138	31	28	61	64	52	65	103	83	114	179	14		1.04319	9.98177	7.23318	17.2323	16.5556	24.4417	24.4309	15.0707	21.3171	27.6674	29.435	41.2215	36.0617	11.097
SBULL_12460.mrna1	181	histone-lysine N-methyltransferase trithorax	1	C:GO:0016020	C:membrane						NP_609451.1 uncharacterized protein Dmel_CG6495 [Drosophila melanogaster]		70	11	100	11	5	1	4	48	42	46	65	41	63	4		16.7434	4.02304	4.98006	4.96195	2.64157	0.326738	1.27561	9.47793	9.3844	8.41843	15.7051	10.1005	8.64719	2.28812
SBULL_12461.mrna1	90	histone-lysine N-methyltransferase trithorax	1	C:GO:0016021	C:integral component of membrane						NP_609451.1 uncharacterized protein Dmel_CG6495 [Drosophila melanogaster]		16	1	53	7	8	0	1	21	27	14	16	14	34	3		2.05364	0	7.22428	2.26273	4.27975	0	0	18.9645	27.5912	11.7179	17.6806	15.7738	21.3434	5.65707
SBULL_12467.mrna1	42	---NA---											0	0	0	0	0	0	0	15	7	8	6	8	8	0		0	0	0	0	0	0	0	208.542	110.125	103.085	102.072	138.765	77.3134	0
SBULL_12468.mrna1	201	rho GTPase-activating protein 18	9	F:GO:0003779; F:GO:0005096; P:GO:0007165; P:GO:0008284; C:GO:0015629; P:GO:0030042; P:GO:0034260; P:GO:0043547; C:GO:0045179	F:actin binding; F:GTPase activator activity; P:signal transduction; P:positive regulation of cell proliferation; C:actin cytoskeleton; P:actin filament depolymerization; P:negative regulation of GTPase activity; P:positive regulation of GTPase activity; C:apical cortex						NP_001036458.1 conundrum, isoform B [Drosophila melanogaster]		469	292	427	67	36	63	75	101	114	82	94	79	114	13		92.877	97.3153	16.8213	27.5279	14.9583	16.206	19.8768	26.8408	33.2199	23.9441	33.0489	31.6039	23.4387	6.93491
SBULL_1247.mrna1	1316	syndetin	3	C:GO:0000938; C:GO:0005768; P:GO:0032456	C:GARP complex; C:endosome; P:endocytic recycling						NP_611258.2 vacuolar protein sorting 50 [Drosophila melanogaster]		1148	129	4177	101	130	113	144	931	749	714	633	668	1074	120		24.5271	4.04466	20.9181	4.01939	6.15049	3.17142	3.98769	16.6397	15.1483	11.8276	13.8438	14.918	13.3433	7.01348
SBULL_12475.mrna1	270	WD repeat and FYVE domain-containing protein 3	13	P:GO:0001578; C:GO:0005764; P:GO:0007420; P:GO:0022416; P:GO:0031396; C:GO:0031594; P:GO:0032418; P:GO:0046622; F:GO:0046872; P:GO:0048749; C:GO:0048786; P:GO:0050807; P:GO:0097156	P:microtubule bundle formation; C:lysosome; P:brain development; P:chaeta development; P:regulation of protein ubiquitination; C:neuromuscular junction; P:lysosome localization; P:positive regulation of organ growth; F:metal ion binding; P:compound eye development; C:presynaptic active zone; P:regulation of synapse organization; P:fasciculation of motor neuron axon						NP_608968.2 blue cheese [Drosophila melanogaster]		98	9	57	24	6	23	58	25	22	12	14	10	32	1		14.0287	2.0885	1.76995	7.31449	1.82534	4.28523	11.222	3.09236	2.99935	2.04721	2.56767	1.92907	2.76374	0.33868
SBULL_12478.mrna1	133	protein kinase shaggy isoform X2	3	F:GO:0004672; F:GO:0005524; P:GO:0006468	F:protein kinase activity; F:ATP binding; P:protein phosphorylation						NP_001036259.2 shaggy, isoform R [Drosophila melanogaster]		225	265	664	126	161	173	557	343	336	398	272	286	482	59		30.0721	51.0282	52.3816	36.2806	68.369	13.7626	44.9308	117.725	130.496	126.607	114.235	122.47	114.996	52.7327
SBULL_12480.mrna1	86	---NA---											2	2	0	31	77	201	248	0	0	1	3	0	0	0		2.3929	3.68882	0	83.1275	180.382	315.586	414.482	0	0	0.959141	3.7989	0	0	0
SBULL_12483.mrna1	123	DNA-directed RNA polymerase III subunit RPC9	4	F:GO:0000166; F:GO:0001056; C:GO:0005666; P:GO:0006384	F:nucleotide binding; F:RNA polymerase III activity; C:RNA polymerase III complex; P:transcription initiation from RNA polymerase III promoter	EC:2.7.7.6	DNA-directed RNA polymerase				NP_996493.1 receptor component protein, isoform B [Drosophila melanogaster]		147	72	120	14	59	56	62	44	36	35	44	50	69	28		70.5412	54.151	13.392	12.7696	60.6408	36.3987	39.0472	30.5921	30.5179	24.2499	38.9114	46.203	32.7373	30.9266
SBULL_12485.mrna1	99	nitrogen permease regulator 2-like protein	9	C:GO:0005634; P:GO:0007293; P:GO:0010898; P:GO:0034198; C:GO:0035859; C:GO:0044754; P:GO:0045792; P:GO:1904262; P:GO:1904766	C:nucleus; P:germarium-derived egg chamber formation; P:positive regulation of triglyceride catabolic process; P:cellular response to amino acid starvation; C:Seh1-associated complex; C:autolysosome; P:negative regulation of cell size; P:negative regulation of TORC1 signaling; P:negative regulation of macroautophagy by TORC1 signaling						NP_573174.1 nitrogen permease regulator-like 2 [Drosophila melanogaster]		46	14	153	12	24	33	25	41	34	36	24	25	54	9		35.7996	16.6269	20.7062	20.088	39.457	35.2771	25.6744	34.4735	33.5482	24.2829	25.31	22.3654	29.2353	13.9111
SBULL_12487.mrna1	352	uncharacterized protein LOC111685259	3	C:GO:0012505; C:GO:0016021; C:GO:0043231	C:endomembrane system; C:integral component of membrane; C:intracellular membrane-bounded organelle						NP_573177.1 uncharacterized protein Dmel_CG4880, isoform A [Drosophila melanogaster]		1688	494	738	84	44	15	5	476	247	212	71	116	229	15		155.342	69.6059	15.316	15.8865	9.40584	1.73506	0.647163	37.3893	21.9544	15.4339	6.82422	11.368	12.5037	3.69232
SBULL_12493.mrna1	194	density-regulated protein homolog	2	F:GO:0003743; P:GO:0006413	F:translation initiation factor activity; P:translational initiation						NP_573176.1 density regulated protein, isoform A [Drosophila melanogaster]		76	85	937	24	125	44	42	396	398	610	517	457	806	89		16.6277	28.0135	43.39	10.7135	59.6241	12.9507	12.0526	70.1229	79.7503	100.114	112.024	100.964	99.2114	46.2567
SBULL_12494.mrna1	279	UV excision repair protein RAD23 homolog B	4	F:GO:0003684; C:GO:0005634; P:GO:0006289; P:GO:0043161	F:damaged DNA binding; C:nucleus; P:nucleotide-excision repair; P:proteasome-mediated ubiquitin-dependent protein catabolic process						NP_651212.1 uncharacterized protein Dmel_CG10694 [Drosophila melanogaster]		0	1078	6243	0	315	0	12	0	0	0	0	0	0	0		0	208.574	169.688	0	88.097	0	2.08101	0	0	0	0	0	0	0
SBULL_12499.mrna1	293	zinc finger CCCH-type with G patch domain-containing protein	2	F:GO:0003676; F:GO:0046872	F:nucleic acid binding; F:metal ion binding						NP_609331.1 uncharacterized protein Dmel_CG4709, isoform A [Drosophila melanogaster]		199	40	558	22	48	35	40	169	141	131	165	143	222	27		24.8903	7.52034	15.3188	5.56628	13.1602	5.86915	6.51227	16.7563	15.8196	12.0383	20.0184	17.6895	15.3005	8.27222
SBULL_12506.mrna1	379	gamma-aminobutyric acid receptor alpha-like	7	F:GO:0004888; F:GO:0005230; P:GO:0007154; C:GO:0016020; P:GO:0023052; P:GO:0034220; P:GO:0050794	F:transmembrane signaling receptor activity; F:extracellular ligand-gated ion channel activity; P:cell communication; C:membrane; P:signaling; P:ion transmembrane transport; P:regulation of cellular process						NP_524131.1 glycine receptor [Drosophila melanogaster]		4	1	0	4	3	5	4	6	0	9	0	4	4	0		0.273478	0	0	0.551497	0.600649	0.366196	0.236664	0.430372	0	0.598323	0	0.357965	0.199441	0
SBULL_12511.mrna1	111	gamma-aminobutyric acid receptor alpha-like	5	P:GO:0007165; C:GO:0016020; F:GO:0016917; F:GO:0022824; P:GO:0034220	P:signal transduction; C:membrane; F:GABA receptor activity; F:transmitter-gated ion channel activity; P:ion transmembrane transport						NP_524131.1 glycine receptor [Drosophila melanogaster]		0	0	0	0	0	0	0	0	0	1	0	0	0	0		0	0	0	0	0	0	0	0	0	0.475938	0	0	0	0
SBULL_12512.mrna1	165	putative mediator of RNA polymerase II transcription subunit 26											84	0	63	0	2	0	0	25	12	5	3	15	2	0		10.3712	0	3.35748	0	0	0	0	7.82138	4.16494	1.70567	1.40744	4.87912	0.95944	0
SBULL_12513.mrna1	203	chitinase-like protein Idgf3	4	P:GO:0005975; F:GO:0008061; C:GO:0016021; F:GO:0016787	P:carbohydrate metabolic process; F:chitin binding; C:integral component of membrane; F:hydrolase activity						NP_001246043.1 imaginal disc growth factor 2, isoform B [Drosophila melanogaster]		1198	1009	478	866	1725	2921	884	281	329	298	175	359	591	68		277.755	350.715	21.2479	387.34	773.646	930.384	413.814	75.528	95.9388	87.1576	65.9271	124.748	108.449	33.727
SBULL_12519.mrna1	143	amyloid protein-binding protein 2	3	C:GO:0005871; P:GO:0045451; P:GO:0060632	C:kinesin complex; P:pole plasm oskar mRNA localization; P:regulation of microtubule-based movement						NP_572328.1 protein interacting with APP tail-1, isoform A [Drosophila melanogaster]		0	4	299	3	2	0	0	34	35	26	19	31	71	6		15.3209	6.46094	36.1822	5.15409	8.47769	2.40885	5.67187	30.0526	34.3436	23.1655	32.4045	33.0399	33.3003	11.3395
SBULL_12520.mrna1	120	amyloid protein-binding protein 2	3	C:GO:0005871; P:GO:0045451; P:GO:0060632	C:kinesin complex; P:pole plasm oskar mRNA localization; P:regulation of microtubule-based movement						NP_572328.1 protein interacting with APP tail-1, isoform A [Drosophila melanogaster]		105	32	401	20	14	16	17	85	79	75	62	87	115	6		19.1723	8.94222	33.1787	10.2888	10.5523	5.34445	4.61667	38.025	41.594	30.9353	36.1893	47.9685	37.0049	6.42182
SBULL_12523.mrna1	1571	gamma-tubulin complex component 6	4	C:GO:0000922; C:GO:0005815; P:GO:0007020; F:GO:0043015	C:spindle pole; C:microtubule organizing center; P:microtubule nucleation; F:gamma-tubulin binding						NP_648537.2 Grip163 [Drosophila melanogaster]		1988	265	4319	212	245	172	259	1549	1106	819	886	973	1178	155		37.394	7.44002	18.0361	8.05978	10.2248	4.37489	6.15597	22.988	18.5733	11.2651	16.0893	18.0157	12.1523	7.53846
SBULL_12534.mrna1	116	cytochrome b5 isoform X2	3	C:GO:0016021; F:GO:0020037; F:GO:0046872	C:integral component of membrane; F:heme binding; F:metal ion binding						NP_572304.5 uncharacterized protein Dmel_CG3566, isoform B [Drosophila melanogaster]		70	70	343	69	166	78	57	244	252	287	242	210	479	100		17.0868	22.6856	25.9792	34.7832	65.1762	32.7048	14.3782	112.811	131.84	122.983	136.909	121.135	153.943	114.687
SBULL_12535.mrna1	52	---NA---											0	0	16	2	1	0	0	23	17	37	26	20	42	1		0	0	10.9801	0	0	0	0	130.896	109.48	195.165	181.062	142.01	166.154	9.43117
SBULL_12567.mrna1	193	ribonuclease P protein subunit rpr2									NP_788853.1 uncharacterized protein Dmel_CG33082, isoform A [Drosophila melanogaster]		49	13	163	3	25	3	2	50	34	52	44	46	88	11		10.3613	4.31725	7.22983	1.3496	10.0923	0.889792	0.57839	8.92475	6.86736	8.60261	9.61022	10.244	10.9187	5.75761
SBULL_12574.mrna1	180	C-type lectin 37Db-like	1	C:GO:0016020	C:membrane						NP_572491.1 uncharacterized protein Dmel_CG12111, isoform A [Drosophila melanogaster]		0	0	1	51	0	48	0	0	0	0	0	0	0	0		0	0	0.0534208	19.0186	0	11.5335	0	0	0	0	0	0	0	0
SBULL_12578.mrna1	1235	protein suppressor of white apricot	2	F:GO:0003723; P:GO:0006396	F:RNA binding; P:RNA processing						NP_476756.2 suppressor of white-apricot, isoform A [Drosophila melanogaster]		752	265	3015	158	409	468	703	956	966	1194	1024	947	1603	634		21.0209	11.1244	19.6729	9.13842	23.9618	17.9734	25.8996	24.5418	27.9224	27.3697	31.9248	29.1646	28.9774	48.6462
SBULL_1259.mrna1	419	succinyl-CoA ligase [GDP-forming] subunit beta, mitochondrial	9	F:GO:0000287; F:GO:0004775; F:GO:0004776; F:GO:0005524; F:GO:0005525; C:GO:0005739; P:GO:0006099; P:GO:0006104; P:GO:0048085	F:magnesium ion binding; F:succinate-CoA ligase (ADP-forming) activity; F:succinate-CoA ligase (GDP-forming) activity; F:ATP binding; F:GTP binding; C:mitochondrion; P:tricarboxylic acid cycle; P:succinyl-CoA metabolic process; P:adult chitin-containing cuticle pigmentation	EC:6.2.1.5; EC:6.2.1.4	Succinate--CoA ligase (ADP-forming); Succinate--CoA ligase (GDP-forming)				NP_651963.1 sucb, isoform A [Drosophila melanogaster]		128	242	2539	112	350	101	159	1158	1008	1962	1543	1646	2554	804		10.0377	28.0795	42.3663	17.2877	60.8409	10.727	16.3787	73.595	72.4911	115.568	119.994	130.514	112.829	161.793
SBULL_12602.mrna1	2662	tetratricopeptide repeat protein 28									NP_648228.2 uncharacterized protein Dmel_CG43163, isoform C [Drosophila melanogaster]		1966	1072	3609	105	614	42	75	1013	820	673	1276	937	1211	154		21.3479	17.5699	8.84383	2.2705	13.6902	0.57895	1.0755	8.7191	7.97871	5.36352	13.4468	10.0522	7.25629	4.3592
SBULL_12607.mrna1	77	uncharacterized protein LOC111684185 isoform X2	3	F:GO:0003677; C:GO:0005634; F:GO:0046872	F:DNA binding; C:nucleus; F:metal ion binding								47	23	48	25	24	30	20	45	36	68	43	42	63	6		43.7711	23.8967	10.8843	50.4714	53.0515	30.0367	20.2649	66.0645	59.8058	92.5264	77.2465	76.9295	64.2922	16.3249
SBULL_12609.mrna1	70	---NA---											7	5	31	1	16	2	3	41	36	60	42	30	69	2		3.49721	0	5.12222	0	38.823	0	0	86.9495	82.3732	118.07	106.395	80.7303	99.7974	7.02995
SBULL_12615.mrna1	58	---NA---											11	2	14	3	17	3	3	6	2	3	1	0	3	0		58.2434	94.1869	8.37951	330.834	606.166	0	0	23.7683	8.96522	11.0146	4.84731	0	8.26094	0
SBULL_1262.mrna1	2084	zinc finger SWIM domain-containing protein 8	1	F:GO:0008270	F:zinc ion binding						NP_652493.2 uncharacterized protein Dmel_CG34401, isoform A [Drosophila melanogaster]		5297	3133	17707	525	181	228	845	1931	1832	1647	2068	2012	2492	226		75.4015	66.8376	55.5504	15.0025	5.64591	4.35258	15.5295	21.3647	22.9364	16.8892	27.9976	27.7735	19.1657	8.21683
SBULL_1263.mrna1	526	box A-binding factor-like	1	F:GO:0008270	F:zinc ion binding								3334	1752	5192	278	230	310	621	525	482	538	612	623	828	88		183.749	148.655	67.7044	31.4454	26.8588	22.7456	45.4955	25.5699	26.5645	24.2858	36.4734	37.8569	28.0325	13.7125
SBULL_12630.mrna1	761	hypothetical protein FF38_11938, partial											503	684	2635	136	306	324	810	765	967	1022	803	815	1216	194		20.7583	42.3721	23.7305	11.2897	27.5985	17.9074	43.2502	24.6235	35.2209	30.4888	31.6271	32.7291	27.2073	20.2122
SBULL_12631.mrna1	282	uncharacterized protein LOC111677986, partial											53	104	788	12	63	36	65	249	364	322	264	210	353	36		6.17235	19.9405	21.2164	2.92388	16.4027	6.16383	11.1169	25.9576	42.9389	31.1115	33.6762	27.3131	25.5801	11.5568
SBULL_12632.mrna1	272	hypothetical protein FF38_11938, partial											360	353	1111	81	340	235	471	378	456	485	395	426	570	111		49.2523	67.0213	30.8027	21.4534	94.9258	41.8888	79.9494	41.3375	56.4289	49.1581	52.8572	58.1232	43.33	37.252
SBULL_12646.mrna1	155	protein takeout-like	2	C:GO:0016020; C:GO:0016021	C:membrane; C:integral component of membrane						NP_651531.1 uncharacterized protein Dmel_CG14258 [Drosophila melanogaster]		2	6	1	26	20	15	7	10	11	33	4	4	1	4		0.620793	2.81131	0.0674533	16.6063	12.1171	6.28485	2.87142	2.56494	3.19268	7.84499	1.25543	1.28005	0.178295	2.86406
SBULL_12650.mrna1	86	protein takeout-like	2	C:GO:0016020; C:GO:0016021	C:membrane; C:integral component of membrane						NP_651531.1 uncharacterized protein Dmel_CG14258 [Drosophila melanogaster]		0	3	0	8	12	1	0	2	5	11	1	0	3	0		0	5.53324	0	21.4522	29.6519	1.66977	0	2.06972	5.85513	10.5506	1.2663	0	2.15807	0
SBULL_12652.mrna1	434	cytochrome b5-related protein	7	C:GO:0005739; P:GO:0006629; C:GO:0016021; F:GO:0016491; F:GO:0020037; F:GO:0046872; P:GO:0055114	C:mitochondrion; P:lipid metabolic process; C:integral component of membrane; F:oxidoreductase activity; F:heme binding; F:metal ion binding; P:oxidation-reduction process						NP_477154.1 cytochrome b5-related, isoform A [Drosophila melanogaster]		2350	2694	213	5515	8392	6776	2242	65	54	130	35	43	282	221		180.388	312.616	3.56303	855.115	1415.76	697.662	225.642	3.96166	3.72428	7.34358	2.61027	3.26979	11.9474	42.7274
SBULL_12656.mrna1	211	glutathione S-transferase D1	5	F:GO:0004364; C:GO:0005737; P:GO:0006749; P:GO:0009636; F:GO:0018833	F:glutathione transferase activity; C:cytoplasm; P:glutathione metabolic process; P:response to toxic substance; F:DDT-dehydrochlorinase activity	EC:2.5.1.18; EC:4.5.1.1	Glutathione transferase; DDT-dehydrochlorinase				NP_524326.1 glutathione S transferase D1, isoform A [Drosophila melanogaster]		8	61	111	34	25	25	14	466	493	819	346	240	623	58		0.387693	3.50204	3.73564	13.4165	10.5807	0.260545	3.55234	76.2942	90.5701	121.179	68.7289	50.2215	70.495	26.9254
SBULL_12660.mrna1	209	glutathione S-transferase D1	3	F:GO:0004364; P:GO:0006749; F:GO:0018833	F:glutathione transferase activity; P:glutathione metabolic process; F:DDT-dehydrochlorinase activity	EC:2.5.1.18; EC:4.5.1.1	Glutathione transferase; DDT-dehydrochlorinase				NP_524326.1 glutathione S transferase D1, isoform A [Drosophila melanogaster]		23	103	9	302	581	40	25	9	10	26	10	17	21	13		4.51907	30.4696	0.344165	120.419	244.054	10.5645	6.43108	1.42411	1.79055	3.81308	2.32347	3.35612	2.30984	5.64166
SBULL_12663.mrna1	928	biorientation of chromosomes in cell division protein 1-like 1	2	P:GO:0046958; P:GO:0051124	P:nonassociative learning; P:synaptic growth at neuromuscular junction						NP_733240.1 biorientation defective 1, isoform A [Drosophila melanogaster]		225	1254	2585	113	220	299	678	424	422	490	589	517	802	195		7.5101	62.284	18.8025	7.43238	15.8146	13.2017	29.1961	10.9973	12.3856	11.7792	18.6934	16.7301	14.4596	16.444
SBULL_12675.mrna1	281	probable histone-lysine N-methyltransferase Mes-4											206	172	1442	6	49	6	18	142	85	69	38	47	78	18		25.1979	33.5186	36.9996	1.60221	13.8754	1.0615	3.09272	14.8726	10.074	6.69806	4.87009	6.14165	5.67879	5.80361
SBULL_12678.mrna1	382	sodium-dependent serotonin transporter	6	F:GO:0005328; P:GO:0006837; F:GO:0008504; C:GO:0016020; C:GO:0030424; P:GO:0034220	F:neurotransmitter:sodium symporter activity; P:serotonin transport; F:monoamine transmembrane transporter activity; C:membrane; C:axon; P:ion transmembrane transport						NP_523846.2 serotonin transporter, isoform A [Drosophila melanogaster]		0	0	2	2	5	0	2	4	0	5	4	6	4	4		0	0	0.0397127	0.363428	0.79176	0	0.233939	0.283571	0	0.394234	0.433737	0.53069	0.197117	0.893347
SBULL_12684.mrna1	314	transcription factor grauzone-like	3	F:GO:0003676; C:GO:0005634; F:GO:0008270	F:nucleic acid binding; C:nucleus; F:zinc ion binding						NP_001286588.1 uncharacterized protein Dmel_CG15073, isoform B [Drosophila melanogaster]		27	1	482	6	22	13	0	52	32	52	27	56	54	16		3.32513	0.689235	14.5814	1.62204	6.2872	2.15131	0.447363	10.5194	7.38839	9.16136	7.87854	14.7083	10.4011	5.63672
SBULL_12686.mrna1	77	transcription factor grauzone-like	1	F:GO:0005488	F:binding								0	0	1	0	1	0	0	14	3	16	7	7	14	0		0	0	0.310979	0	3.78939	0	0	20.5534	4.98381	21.7709	12.575	12.8216	14.2872	0
SBULL_12693.mrna1	41	transcription factor grauzone-like	3	F:GO:0003676; C:GO:0005634; F:GO:0008270	F:nucleic acid binding; C:nucleus; F:zinc ion binding								0	0	1	0	0	0	0	7	0	4	3	4	4	0		0	0	13.2637	0	0	0	0	107.457	0	56.9113	56.3526	76.61	42.6835	0
SBULL_12694.mrna1	258	transcription factor grauzone-like	1	F:GO:0005488	F:binding						NP_001286588.1 uncharacterized protein Dmel_CG15073, isoform B [Drosophila melanogaster]		2	0	225	4	8	6	0	27	9	11	10	10	24	4		0.442188	0.665011	9.25703	1.79262	3.22678	1.5822	0.576622	5.63607	4.38464	3.80894	6.17814	5.7133	4.89721	2.50876
SBULL_12703.mrna1	106	probable ATP-dependent RNA helicase CG8611	3	F:GO:0003723; F:GO:0004386; F:GO:0005524	F:RNA binding; F:helicase activity; F:ATP binding	EC:3.6.1.15	Nucleoside-triphosphate phosphatase				NP_573214.1 uncharacterized protein Dmel_CG8611, isoform A [Drosophila melanogaster]		11	19	90	11	35	9	19	1	4	6	9	5	17	31		6.54894	13.951	12.446	15.3128	25.0731	9.84948	15.1433	6.91195	7.16963	7.47392	17.6203	8.62359	18.4179	62.2419
SBULL_12706.mrna1	85	X-ray repair cross-complementing protein 5	7	P:GO:0000723; F:GO:0003684; P:GO:0006303; P:GO:0006310; F:GO:0016817; F:GO:0042162; C:GO:0043564	P:telomere maintenance; F:damaged DNA binding; P:double-strand break repair via nonhomologous end joining; P:DNA recombination; F:hydrolase activity, acting on acid anhydrides; F:telomeric DNA binding; C:Ku70:Ku80 complex						NP_609767.2 Ku80 [Drosophila melanogaster]		17	20	133	0	2	1	1	38	25	30	31	20	43	5		19.9674	38.5263	22.3995	0	5.14078	1.74514	1.78734	40.7577	30.3424	29.8228	40.6857	26.7635	32.0595	8.5707
SBULL_12708.mrna1	73	X-ray repair cross-complementing protein 5	9	P:GO:0000723; F:GO:0003677; F:GO:0003684; C:GO:0005634; P:GO:0006303; P:GO:0006310; F:GO:0016817; F:GO:0042162; C:GO:0043564	P:telomere maintenance; F:DNA binding; F:damaged DNA binding; C:nucleus; P:double-strand break repair via nonhomologous end joining; P:DNA recombination; F:hydrolase activity, acting on acid anhydrides; F:telomeric DNA binding; C:Ku70:Ku80 complex								0	0	0	0	0	0	0	5	1	10	8	6	10	0		0	0	0.738528	0	0	0	0	21.0337	3.96689	19.4947	23.593	39.3637	25.5869	0
SBULL_12709.mrna1	304	cytosolic endo-beta-N-acetylglucosaminidase	1	F:GO:0016787	F:hydrolase activity						NP_788923.1 uncharacterized protein Dmel_CG5613, isoform B [Drosophila melanogaster]		118	10246	4177	48	126	36	83	66	37	46	45	65	111	20		8.59642	1194.02	102.237	6.03484	28.5364	3.36081	4.97085	7.08957	4.27862	4.29295	5.20506	8.60933	7.75359	5.86026
SBULL_12710.mrna1	135	cytosolic endo-beta-N-acetylglucosaminidase	2	C:GO:0005737; F:GO:0033925	C:cytoplasm; F:mannosyl-glycoprotein endo-beta-N-acetylglucosaminidase activity	EC:3.2.1.96	Mannosyl-glycoprotein endo-beta-N-acetylglucosaminidase				NP_788923.1 uncharacterized protein Dmel_CG5613, isoform B [Drosophila melanogaster]		85	7800	1049	17	73	13	63	18	13	19	14	18	22	3		33.9931	4706.75	95.0124	13.117	62.2761	6.95803	33.141	9.65751	7.53672	7.09898	7.3349	8.30969	7.40763	2.66239
SBULL_12713.mrna1	53	---NA---											2	83	139	0	1	0	1	9	11	11	1	8	11	0		0	234.47	28.7019	0	0	0	0	50.0044	69.1581	56.6447	6.79861	55.4553	42.4835	0
SBULL_12716.mrna1	207	dual specificity protein phosphatase CDC14A isoform X1	2	F:GO:0004721; P:GO:0006470	F:phosphoprotein phosphatase activity; P:protein dephosphorylation	EC:3.1.3.16; EC:3.1.3.41	Protein-serine/threonine phosphatase; 4-nitrophenylphosphatase				NP_001162904.1 cell division cycle 14, isoform B [Drosophila melanogaster]		2834	12	272	193	27	43	96	352	206	201	39	45	112	28		564.302	3.599	11.6865	77.8903	11.7385	11.5145	25.0412	56.5002	37.4162	29.9023	7.65996	9.01172	12.4965	13.3335
SBULL_12718.mrna1	390	dual oxidase maturation factor 1	7	F:GO:0005515; C:GO:0005789; C:GO:0005886; P:GO:0007616; P:GO:0015031; C:GO:0016021; C:GO:0045178	F:protein binding; C:endoplasmic reticulum membrane; C:plasma membrane; P:long-term memory; P:protein transport; C:integral component of membrane; C:basal part of cell						NP_609733.1 moladietz, isoform A [Drosophila melanogaster]		25	613	2615	198	262	235	238	168	621	194	30	37	58	48		1.49776	53.1928	47.8189	21.8473	31.7404	13.4475	10.7477	11.6387	48.6824	12.4566	2.54314	3.19805	2.79309	10.4877
SBULL_12724.mrna1	255	uncharacterized protein LOC111689400									NP_733152.1 uncharacterized protein Dmel_CG5455, isoform B [Drosophila melanogaster]		268	5	194	91	222	54	298	256	113	286	80	86	135	30		39.517	1.12563	5.98153	26.4023	72.7376	10.6458	55.4451	31.2572	15.525	33.0613	12.1166	13.2473	11.6102	10.9106
SBULL_12729.mrna1	755	eater	8	F:GO:0005044; P:GO:0006910; P:GO:0006955; C:GO:0009986; P:GO:0010811; F:GO:0042834; P:GO:0050766; P:GO:0050830	F:scavenger receptor activity; P:phagocytosis, recognition; P:immune response; C:cell surface; P:positive regulation of cell-substrate adhesion; F:peptidoglycan binding; P:positive regulation of phagocytosis; P:defense response to Gram-positive bacterium						NP_651533.3 eater [Drosophila melanogaster]		68	150	227	76	42	271	212	509	436	950	153	359	386	7		2.79451	9.32378	2.02764	6.28002	3.7667	15.108	11.3783	16.8188	16.313	29.0699	6.19791	15.0289	9.02792	0.73553
SBULL_12730.mrna1	393	eater	2	C:GO:0016020; C:GO:0016021	C:membrane; C:integral component of membrane						NP_651533.3 eater [Drosophila melanogaster]		81	90	151	73	70	386	198	359	299	803	94	245	246	5		6.7225	11.1451	2.67435	12.1439	11.1241	43.0148	21.5258	24.6412	23.2233	51.0839	7.89496	20.9808	11.7372	1.08286
SBULL_12733.mrna1	105	von Willebrand factor D and EGF domain-containing protein-like	1	C:GO:0016020	C:membrane						NP_723857.1 nimrod B2 [Drosophila melanogaster]		11	30	16	9	6	71	42	58	52	125	13	42	50	0		0	3.05984	1.5357	1.42639	2.84804	2.75003	3.65039	34.2282	34.7251	68.3702	9.38758	30.9238	20.511	0
SBULL_12749.mrna1	178	---NA---											0	46	1	0	0	2	0	0	0	0	0	0	1	0		0	16.5102	0.054326	0	0	0.67051	0	0	0	0	0	0	0.141002	0
SBULL_12751.mrna1	493	probable cytochrome P450 4s3	8	F:GO:0004497; F:GO:0005506; C:GO:0005789; C:GO:0016021; F:GO:0016705; F:GO:0020037; C:GO:0031090; P:GO:0055114	F:monooxygenase activity; F:iron ion binding; C:endoplasmic reticulum membrane; C:integral component of membrane; F:oxidoreductase activity, acting on paired donors, with incorporation or reduction of molecular oxygen; F:heme binding; C:organelle membrane; P:oxidation-reduction process						NP_573003.2 Cyp4s3 [Drosophila melanogaster]		5	10	45	1	0	0	4	564	383	681	285	432	621	48		0.335277	1.00661	0.63619	0.134928	0	0	0.347494	29.6025	22.7475	33.1281	18.3041	28.2892	22.657	8.03903
SBULL_12760.mrna1	248	C-factor isoform X1	3	F:GO:0000166; F:GO:0004090; P:GO:0055114	F:nucleotide binding; F:carbonyl reductase (NADPH) activity; P:oxidation-reduction process	EC:1.1.1.184	Carbonyl reductase (NADPH)				NP_572466.1 sniffer, isoform A [Drosophila melanogaster]		111	70	473	72	163	147	101	250	174	416	198	233	431	211		16.4634	16.1199	13.8406	22.3686	43.5018	29.3929	18.4424	30.9857	24.4037	47.7876	30.029	36.03	37.133	79.4764
SBULL_12762.mrna1	1896	RNA polymerase II large subunit	5	F:GO:0003677; F:GO:0003899; C:GO:0005665; C:GO:0005703; P:GO:0006366	F:DNA binding; F:DNA-directed 5'-3' RNA polymerase activity; C:RNA polymerase II, core complex; C:polytene chromosome puff; P:transcription by RNA polymerase II	EC:2.7.7.6	DNA-directed RNA polymerase				NP_511124.1 RNA polymerase II 215kD subunit [Drosophila melanogaster]		1752	14837	17857	985	1710	1904	3897	2672	3092	3237	3809	3419	4572	1958		27.4106	348.035	61.2844	30.6855	56.6426	39.7389	79.0275	32.6037	42.6928	36.6078	56.8717	52.0496	38.7792	78.4054
SBULL_12783.mrna1	354	probable serine/threonine-protein kinase DDB_G0282963 isoform X2	1	F:GO:0046983	F:protein dimerization activity								68	72	580	98	90	210	300	244	261	257	258	251	347	21		6.7293	10.4064	12.0953	18.1732	18.4664	27.4376	38.3047	19.0319	23.0365	18.5792	24.6244	24.4261	18.8141	5.13504
SBULL_12784.mrna1	219	integrator complex subunit 6 homolog isoform X1	1	F:GO:0046983	F:protein dimerization activity								53	48	219	85	33	112	267	113	124	147	81	84	144	8		7.35912	9.96902	7.53854	22.4505	10.4497	22.7416	46.9223	16.696	20.732	20.1304	14.6445	15.4847	14.7897	3.53611
SBULL_12793.mrna1	44	---NA---											0	0	7	1	0	3	0	1	2	7	12	9	20	0		0	0	0	0	0	0	0	11.5097	26.0482	74.6726	169.004	129.239	160.013	0
SBULL_12797.mrna1	393	nuclear speckle splicing regulatory protein 1									NP_727694.1 uncharacterized protein Dmel_CG15747, isoform A [Drosophila melanogaster]		115	205	2263	52	298	246	207	314	256	422	429	484	527	121		9.94278	26.7214	43.0159	9.14265	56.5228	28.6087	23.428	21.5989	19.8631	26.8186	35.9943	41.4052	25.1186	26.1796
SBULL_12798.mrna1	295	steroid receptor RNA activator 1	1	C:GO:0044464	C:cell part						NP_572465.1 uncharacterized protein Dmel_CG2147 [Drosophila melanogaster]		286	141	848	176	239	456	381	309	275	329	406	373	397	57		35.4651	26.2811	22.2508	43.8931	64.9688	75.8077	61.4919	30.3673	30.582	29.9671	48.8234	45.7346	27.1207	17.3199
SBULL_12802.mrna1	64	---NA---											1	0	5	0	0	0	0	5	3	6	8	6	12	0		0	0	2.40262	0	0	0	0	13.8452	9.40017	15.3986	27.1066	20.7285	23.0979	0
SBULL_12809.mrna1	590	thioredoxin reductase 1, mitochondrial isoform X2	7	F:GO:0004791; C:GO:0005623; F:GO:0009055; P:GO:0022900; P:GO:0045454; F:GO:0050660; P:GO:0098869	F:thioredoxin-disulfide reductase activity; C:cell; F:electron transfer activity; P:electron transport chain; P:cell redox homeostasis; F:flavin adenine dinucleotide binding; P:cellular oxidant detoxification	EC:1.8.1.9	Thioredoxin-disulfide reductase				NP_727252.1 thioredoxin reductase-1, isoform C [Drosophila melanogaster]		2937	659	15758	1582	2113	2376	2741	4015	3344	5279	2553	2345	3879	1563		147.25	49.4542	181.879	155.243	220.12	162.14	179.952	171.572	161.7	209.08	133.495	125.023	115.224	213.901
SBULL_12811.mrna1	61	---NA---											31	7	400	30	47	27	28	236	180	301	140	116	256	21		454.605	234.094	179.686	1411.16	1311.76	609.277	1222.79	776.985	670.591	918.476	564.005	476.482	585.872	113.172
SBULL_12816.mrna1	91	forkhead box protein A2-A-like	4	F:GO:0000976; F:GO:0003700; C:GO:0005634; P:GO:0006355	F:transcription regulatory region sequence-specific DNA binding; F:DNA-binding transcription factor activity; C:nucleus; P:regulation of transcription, DNA-templated						NP_726889.3 forkhead domain 3F [Drosophila melanogaster]		1	0	0	0	0	0	0	0	0	0	0	0	0	0		0	0	0	0	0	0	0	0	0	0	0	0	0	0
SBULL_12819.mrna1	85	---NA---											0	0	0	0	0	0	0	0	0	0	0	0	0	0		0	0	0	0	0	0	0	0	0	0	0	0	0	0
SBULL_12822.mrna1	371	cyclin-Y	3	P:GO:0000079; F:GO:0019901; P:GO:0048589	P:regulation of cyclin-dependent protein serine/threonine kinase activity; F:protein kinase binding; P:developmental growth						NP_609519.1 cyclin Y, isoform A [Drosophila melanogaster]		98	101	1125	51	135	83	99	355	389	466	410	464	667	71		8.79072	14.047	21.405	9.24288	24.439	10.0188	11.7775	26.1361	32.4076	31.7979	36.936	42.6204	34.135	16.4366
SBULL_12826.mrna1	131	translocation protein SEC62 isoform X2	4	P:GO:0015031; C:GO:0016020; C:GO:0016021; C:GO:0030176	P:protein transport; C:membrane; C:integral component of membrane; C:integral component of endoplasmic reticulum membrane						NP_001285792.1 translocation protein 1, isoform D [Drosophila melanogaster]		0	346	6913	0	133	0	0	1	0	1	0	0	0	0		0	211.339	519.083	0	113.561	0	0	0.354055	0	0.328149	0	0	0	0
SBULL_12827.mrna1	142	classical arabinogalactan protein 9	3	C:GO:0005576; P:GO:0006030; F:GO:0008061	C:extracellular region; P:chitin metabolic process; F:chitin binding						NP_001096972.1 uncharacterized protein Dmel_CG34324 [Drosophila melanogaster]		0	0	63	1	0	1	0	5032	5677	9506	269	116	2964	0		0	0	4.45061	0.745795	0	0.487861	0	1517.5	1937.28	2656.97	99.2648	43.6449	621.339	0
SBULL_12829.mrna1	132	uncharacterized protein LOC111685715									NP_608588.2 uncharacterized protein Dmel_CG14342 [Drosophila melanogaster]		1	0	23	2	1	0	1	3	1	2	0	1	0	1		0	0	1.86466	1.71245	0	0	0	1.04567	0.394419	0.646106	0	0.434871	0	0.920443
SBULL_12836.mrna1	158	zinc finger matrin-type protein 5	1	F:GO:0046872	F:metal ion binding						NP_722687.1 uncharacterized protein Dmel_CG31922 [Drosophila melanogaster]		24	10	59	18	12	10	6	35	41	49	31	23	69	10		8.72061	5.89978	4.77384	12.9825	11.0929	4.86925	4.36795	15.1244	19.0784	21.1415	16.0797	15.1576	22.5778	9.04565
SBULL_12839.mrna1	853	cysteine-rich protein 2-binding protein	4	C:GO:0005671; P:GO:0006325; F:GO:0016740; F:GO:0046872	C:Ada2/Gcn5/Ada3 transcription activator complex; P:chromatin organization; F:transferase activity; F:metal ion binding						NP_609889.1 Ada2a-containing complex component 2 [Drosophila melanogaster]		69	54	1125	30	86	49	98	91	66	87	90	110	189	123		2.9234	4.00171	10.8156	2.56645	7.72942	2.78354	5.05319	3.83604	3.05463	3.66071	5.00688	5.63683	5.64908	13.8334
SBULL_12853.mrna1	945	solute carrier family 12 member 9	4	F:GO:0005215; P:GO:0006811; C:GO:0016021; P:GO:0055085	F:transporter activity; P:ion transport; C:integral component of membrane; P:transmembrane transport						NP_609887.1 uncharacterized protein Dmel_CG10413, isoform A [Drosophila melanogaster]		464	2498	11830	279	351	593	454	1136	1215	966	1129	1177	1637	329		15.4185	122.267	85.6854	18.7147	24.2401	25.8945	19.2435	30.521	36.7242	24.2332	37.1912	39.7292	30.71	27.8776
SBULL_12861.mrna1	236	basic helix-loop-helix transcription factor amos	4	F:GO:0001012; P:GO:0016360; F:GO:0046982; P:GO:0048813	F:RNA polymerase II regulatory region DNA binding; P:sensory organ precursor cell fate determination; F:protein heterodimerization activity; P:dendrite morphogenesis						NP_477446.1 absent MD neurons and olfactory sensilla [Drosophila melanogaster]		0	1	5	0	0	0	0	1	1	3	7	5	6	1		0	0.249781	0.109249	0	0	0	0	0.132798	0.150271	0.369244	1.13748	0.828417	0.553866	0.40121
SBULL_12863.mrna1	525	uncharacterized protein LOC111687236	1	P:GO:0050789	P:regulation of biological process						NP_608581.2 charon [Drosophila melanogaster]		69	35	332	17	33	57	67	141	142	157	209	254	386	31		3.87018	2.71717	5.16624	1.88329	4.39454	4.50887	5.09297	9.22531	10.1078	9.0027	15.6486	18.4523	16.2184	5.77766
SBULL_12867.mrna1	851	probable ATP-dependent RNA helicase DDX23	5	P:GO:0000375; F:GO:0003676; F:GO:0004386; F:GO:0005524; P:GO:0050688	P:RNA splicing, via transesterification reactions; F:nucleic acid binding; F:helicase activity; F:ATP binding; P:regulation of defense response to virus	EC:3.6.1.15	Nucleoside-triphosphate phosphatase				NP_609888.2 uncharacterized protein Dmel_CG10333 [Drosophila melanogaster]		110	135	218	34	44	83	86	8	7	7	13	12	15	20		8.93896	17.7511	14.244	6.91027	13.8029	10.2812	8.33292	7.20739	7.99455	6.86486	11.8868	12.3687	8.51507	16.4567
SBULL_12885.mrna1	390	protein pelota	22	P:GO:0000212; P:GO:0001745; F:GO:0004519; C:GO:0005634; C:GO:0005737; P:GO:0006412; P:GO:0007141; P:GO:0008315; P:GO:0016441; P:GO:0030718; P:GO:0032790; F:GO:0043022; F:GO:0046872; P:GO:0048132; P:GO:0048137; P:GO:0051078; P:GO:0070481; P:GO:0070651; P:GO:0070966; P:GO:0071025; P:GO:0090305; C:GO:1990533	P:meiotic spindle organization; P:compound eye morphogenesis; F:endonuclease activity; C:nucleus; C:cytoplasm; P:translation; P:male meiosis I; P:G2/MI transition of meiotic cell cycle; P:posttranscriptional gene silencing; P:germ-line stem cell population maintenance; P:ribosome disassembly; F:ribosome binding; F:metal ion binding; P:female germ-line stem cell asymmetric division; P:spermatocyte…						NP_476982.1 pelota [Drosophila melanogaster]		1127	159	2349	193	346	160	155	766	625	733	935	791	1166	405		97.3542	20.5097	43.237	32.8598	61.5454	18.4018	17.0362	53.0669	48.9959	47.0652	79.2613	68.369	56.1508	88.4898
SBULL_12892.mrna1	899	regulation of nuclear pre-mRNA domain-containing protein 2									NP_609886.1 uncharacterized protein Dmel_CG15160, isoform A [Drosophila melanogaster]		615	1834	3643	66	125	68	100	325	259	280	355	302	435	98		21.066	94.2303	27.232	4.57282	9.28414	3.09187	4.41776	8.72369	7.86686	6.96588	11.66	10.1137	8.11649	8.54705
SBULL_12898.mrna1	961	RNA-binding protein 5-A-like	1	F:GO:0003676	F:nucleic acid binding						NP_722689.4 uncharacterized protein Dmel_CG4896, isoform K [Drosophila melanogaster]		500	340	3602	196	363	620	550	1264	1172	1879	1284	1278	2192	612		16.0647	16.3856	25.3888	12.5669	25.7038	26.6163	22.8294	31.5492	33.1019	43.4679	39.2158	39.7979	38.0315	49.6991
SBULL_12906.mrna1	350	dnaJ protein homolog 1 isoform X2	2	P:GO:0006457; F:GO:0051082	P:protein folding; F:unfolded protein binding						NP_001245833.1 uncharacterized protein Dmel_CG5001, isoform C [Drosophila melanogaster]		5308	90	1334	587	273	621	931	1046	585	815	234	187	440	449		444.279	10.8527	28.0374	106.314	50.217	70.5577	106.095	89.3898	55.4991	63.7133	23.7154	19.5417	25.5696	111.265
SBULL_12914.mrna1	83	dnaJ protein homolog 1 isoform X1	2	P:GO:0006457; F:GO:0051082	P:protein folding; F:unfolded protein binding						NP_001245833.1 uncharacterized protein Dmel_CG5001, isoform C [Drosophila melanogaster]		2171	42	226	269	83	290	347	266	204	173	45	62	114	41		2944.08	86.6759	35.6396	806.418	201.259	550.551	668.06	307.149	266.552	185.146	63.582	89.3196	91.5028	90.5844
SBULL_12921.mrna1	435	phospholipase A1 2	4	F:GO:0004620; C:GO:0005576; P:GO:0006629; F:GO:0052689	F:phospholipase activity; C:extracellular region; P:lipid metabolic process; F:carboxylic ester hydrolase activity	EC:3.1.1.1	Carboxylesterase				NP_608661.1 uncharacterized protein Dmel_CG4267, isoform A [Drosophila melanogaster]		172	39	361	135	149	678	253	144	198	238	119	120	246	41		13.3263	4.53705	6.13325	21.0666	25.3752	70.2009	25.4168	8.75268	13.6185	13.4078	8.85075	9.10013	10.3938	7.90612
SBULL_12927.mrna1	774	GATA zinc finger domain-containing protein 6	12	C:GO:0005622; P:GO:0007298; P:GO:0007482; P:GO:0007616; P:GO:0008586; P:GO:0030718; P:GO:0042059; P:GO:0043697; P:GO:0045873; P:GO:0046426; P:GO:0048072; P:GO:0048802	C:intracellular; P:border follicle cell migration; P:haltere development; P:long-term memory; P:imaginal disc-derived wing vein morphogenesis; P:germ-line stem cell population maintenance; P:negative regulation of epidermal growth factor receptor signaling pathway; P:cell dedifferentiation; P:negative regulation of sevenless signaling pathway; P:negative regulation of JAK-STAT cascade; P:compound…						NP_724096.1 suppressor of cytokine signaling at 36E, isoform A [Drosophila melanogaster]		393	260	2553	162	215	950	651	352	346	475	461	397	703	325		15.6702	15.4089	22.3653	12.8756	18.2428	50.4612	33.4311	11.1214	12.3702	13.9095	17.8227	15.6493	15.4395	33.2511
SBULL_12937.mrna1	297	Golgi phosphoprotein 3 homolog sauron	25	C:GO:0000139; P:GO:0000281; P:GO:0000301; P:GO:0000915; C:GO:0005802; C:GO:0005829; P:GO:0006890; P:GO:0007030; P:GO:0007053; P:GO:0007110; P:GO:0007111; P:GO:0007112; P:GO:0007224; F:GO:0010314; F:GO:0017137; C:GO:0031410; C:GO:0031985; C:GO:0032154; F:GO:0032266; P:GO:0036089; P:GO:0043001; P:GO:0048194; F:GO:0070273; F:GO:0070300; P:GO:0090307	C:Golgi membrane; P:mitotic cytokinesis; P:retrograde transport, vesicle recycling within Golgi; P:actomyosin contractile ring assembly; C:trans-Golgi network; C:cytosol; P:retrograde vesicle-mediated transport, Golgi to ER; P:Golgi organization; P:spindle assembly involved in male meiosis; P:meiosis I cytokinesis; P:meiosis II cytokinesis; P:male meiosis cytokinesis; P:smoothened signaling pathw…						NP_608658.1 sauron, isoform A [Drosophila melanogaster]		345	712	2811	143	188	105	70	902	709	1169	716	826	1378	215		41.4339	124.741	69.9199	33.3205	44.4741	16.1528	10.7206	87.8707	78.1571	105.549	85.3503	100.393	93.3145	64.7966
SBULL_12944.mrna1	518	inward rectifier potassium channel irk-1	5	F:GO:0005242; C:GO:0016021; P:GO:0034765; P:GO:0035220; P:GO:0071805	F:inward rectifier potassium channel activity; C:integral component of membrane; P:regulation of ion transmembrane transport; P:wing disc development; P:potassium ion transmembrane transport						NP_001137835.2 inwardly rectifying potassium channel 3, isoform D [Drosophila melanogaster]		369	78	486	141	175	177	75	328	293	441	349	416	699	229		22.8169	7.42058	6.71389	17.5937	23.5635	14.9216	6.15658	16.2591	16.4352	20.2611	21.1691	25.7279	24.0859	36.296
SBULL_12948.mrna1	161	glutaredoxin-related protein 5, mitochondrial	7	C:GO:0005623; F:GO:0009055; F:GO:0015035; P:GO:0022900; P:GO:0045454; F:GO:0046872; F:GO:0051537	C:cell; F:electron transfer activity; F:protein disulfide oxidoreductase activity; P:electron transport chain; P:cell redox homeostasis; F:metal ion binding; F:2 iron, 2 sulfur cluster binding						NP_572974.1 uncharacterized protein Dmel_CG14407 [Drosophila melanogaster]		2929	316	964	610	593	788	884	838	546	954	349	426	713	233		808.346	135.081	51.4007	345.625	368.47	296.594	327.065	201.069	148.244	212.153	102.466	127.526	118.919	157.001
SBULL_12952.mrna1	1205	protein transport protein Sec24C	20	P:GO:0003331; P:GO:0006886; P:GO:0006888; P:GO:0007029; P:GO:0007030; F:GO:0008270; P:GO:0008360; P:GO:0009306; P:GO:0016203; P:GO:0022409; P:GO:0030011; C:GO:0030127; P:GO:0034394; P:GO:0035149; P:GO:0035158; P:GO:0040003; P:GO:0048081; C:GO:0070971; P:GO:0071711; P:GO:0072659	P:positive regulation of extracellular matrix constituent secretion; P:intracellular protein transport; P:ER to Golgi vesicle-mediated transport; P:endoplasmic reticulum organization; P:Golgi organization; F:zinc ion binding; P:regulation of cell shape; P:protein secretion; P:muscle attachment; P:positive regulation of cell-cell adhesion; P:maintenance of cell polarity; C:COPII vesicle coat; P:pr…						NP_001259918.1 secretory 24CD, isoform C [Drosophila melanogaster]		1675	1105	11355	865	1000	2047	1607	3413	3999	3694	3555	3277	4138	973		40.0849	39.6732	62.0978	40.4049	53.7516	64.1201	48.9816	66.9558	88.7745	67.1661	85.3387	80.2077	56.4293	62.3416
SBULL_12968.mrna1	629	protein NEDD1 isoform X1	7	P:GO:0000278; C:GO:0005737; P:GO:0007057; P:GO:0007098; C:GO:0008274; F:GO:0043015; P:GO:0051726	P:mitotic cell cycle; C:cytoplasm; P:spindle assembly involved in female meiosis I; P:centrosome cycle; C:gamma-tubulin ring complex; F:gamma-tubulin binding; P:regulation of cell cycle						NP_609902.3 Grip71 [Drosophila melanogaster]		174	1239	3383	10	76	5	6	97	83	48	177	217	165	5		8.7168	93.4759	36.4759	1.02423	8.41657	0.272631	0.395733	3.85689	3.73446	1.76892	8.61178	10.765	4.56049	0.640075
SBULL_12972.mrna1	126	---NA---											0	20	0	3	64	15	0	0	0	1	0	0	0	0		0	13.6517	0	2.81914	60.1236	8.56218	0	0	0	0.356165	0	0	0	0
SBULL_12973.mrna1	99	Golgi-associated plant pathogenesis-related protein 1	1	C:GO:0005576	C:extracellular region						NP_608663.1 uncharacterized protein Dmel_CG4270, isoform A [Drosophila melanogaster]		643	0	0	74	0	1	0	260	131	130	0	6	64	0		470.065	0	0	108.81	0	1.069	0	179.262	102.205	83.0731	0	5.16125	30.6731	0
SBULL_12975.mrna1	939	alpha-aminoadipic semialdehyde synthase, mitochondrial	7	F:GO:0004753; C:GO:0005737; P:GO:0006091; P:GO:0019878; P:GO:0031060; P:GO:0034969; P:GO:0055114	F:saccharopine dehydrogenase activity; C:cytoplasm; P:generation of precursor metabolites and energy; P:lysine biosynthetic process via aminoadipic acid; P:regulation of histone methylation; P:histone arginine methylation; P:oxidation-reduction process						NP_609150.2 lysine ketoglutarate reductase/saccharopine dehydrogenase, isoform A [Drosophila melanogaster]		143	499	163	23	57	195	529	707	639	1168	607	989	1143	1677		4.35067	23.2859	1.18049	1.52067	3.99497	8.05937	21.2066	18.1058	18.5176	27.7232	19.0214	31.5997	20.3473	139.665
SBULL_12982.mrna1	153	CTLMA2									NP_001245869.1 seminal fluid protein 24F, isoform B [Drosophila melanogaster]		1	13	416	5	30	11	2	1427	1255	1480	3702	4959	6674	10		0.317208	2.39454	19.2226	1.95939	10.3151	3.42634	0	374.633	372.83	360.118	1189.57	1624.29	1217.95	7.30138
SBULL_12983.mrna1	149	lectin subunit alpha-like									NP_728587.1 triforce, isoform C [Drosophila melanogaster]		0	0	11	0	3	5	0	7	24	9	43	62	104	0		0	0	0.719797	0	2.15592	1.79277	0	1.92852	7.48208	2.29811	14.8332	21.3111	20.1084	0
SBULL_12992.mrna1	375	phospholipase A1 2	4	C:GO:0005576; P:GO:0016042; F:GO:0016298; F:GO:0052689	C:extracellular region; P:lipid catabolic process; F:lipase activity; F:carboxylic ester hydrolase activity	EC:3.1.1.1	Carboxylesterase				NP_001286130.1 uncharacterized protein Dmel_CG6675, isoform C [Drosophila melanogaster]		321	61	9	61	263	446	98	156	170	327	495	916	1161	0		20.4959	7.4883	0.183059	9.31002	38.5244	40.7978	8.86925	11.3355	13.9781	22.0224	44.0124	83.0422	58.6421	0
SBULL_12997.mrna1	49	---NA---											0	0	0	0	1	0	0	0	0	0	0	1	1	0		0	0	0	0	0	0	0	0	0	0	0	9.37658	5.22419	0
SBULL_1300.mrna1	257	leucine-rich repeat extensin-like protein 3	1	C:GO:0016020	C:membrane						NP_731155.1 uncharacterized protein Dmel_CG31496 [Drosophila melanogaster]		1561	1	74	197	141	206	460	0	0	3	3	1	3	97		230.034	0.222049	2.39922	58.9594	44.6047	40.8114	87.9901	0	0	0.327054	0.431791	0.146752	0.245291	34.8206
SBULL_13000.mrna1	724	GLI pathogenesis-related 2 L homeolog isoform X1	1	C:GO:0005576	C:extracellular region						NP_608663.1 uncharacterized protein Dmel_CG4270, isoform A [Drosophila melanogaster]		4281	117	2952	283	128	645	171	1784	1417	2038	1924	3445	4551	54		186.785	7.66447	28.3717	24.3721	12.3086	37.6443	9.65453	60.6617	54.5223	64.2281	80.0533	146.149	107.569	5.93578
SBULL_13012.mrna1	494	EF-hand domain-containing family member B									NP_729720.1 uncharacterized protein Dmel_CG32086, isoform A [Drosophila melanogaster]		777	3	10	32	0	1	1	301	163	107	4	19	80	0		67.0339	0.301282	0.236176	6.32685	0	0.268506	0.0866713	24.5585	14.3393	7.8622	0.384445	1.63326	4.44069	0.167101
SBULL_1302.mrna1	277	trimeric intracellular cation channel type B-B	3	F:GO:0015269; C:GO:0016021; P:GO:0071805	F:calcium-activated potassium channel activity; C:integral component of membrane; P:potassium ion transmembrane transport						NP_727973.1 uncharacterized protein Dmel_CG4239, isoform B [Drosophila melanogaster]		79	157	4444	1687	458	1260	714	3793	2784	4637	2195	1141	2251	571		10.6159	30.9111	122.762	446.179	126.888	224.737	123.583	404.871	336.27	458.746	286.697	151.952	167.021	187.046
SBULL_13021.mrna1	2379	protein eyes shut isoform X1	2	F:GO:0005509; C:GO:0016021	F:calcium ion binding; C:integral component of membrane						NP_001259924.2 eyes shut, isoform E [Drosophila melanogaster]		4	23	665	753	323	23	56	259	240	471	118	85	202	111		0.0499067	0.430243	1.88631	20.1101	10.103	0.39981	0.997774	2.65422	2.70858	4.58011	1.58257	1.08376	1.47601	3.77811
SBULL_13022.mrna1	312	---NA---											0	0	14	14	11	0	0	6	9	12	1	0	12	1		0.115576	0.17369	1.11881	13.5483	13.4347	0.154899	0.450973	1.55427	2.37953	3.55901	1.45438	0.228137	1.7795	1.13601
SBULL_1305.mrna1	273	trimeric intracellular cation channel type B-B	4	F:GO:0015269; P:GO:0015672; C:GO:0016021; P:GO:0098655	F:calcium-activated potassium channel activity; P:monovalent inorganic cation transport; C:integral component of membrane; P:cation transmembrane transport						NP_727973.1 uncharacterized protein Dmel_CG4239, isoform B [Drosophila melanogaster]		1838	1	21	131	0	3	0	769	355	314	2	17	190	0		241.261	0.205873	0.631814	34.1054	0	0.550962	0	83.6863	43.7161	31.6708	0.266325	2.30815	14.3729	0
SBULL_13060.mrna1	1416	leucine-rich PPR motif-containing protein, mitochondrial	14	F:GO:0003730; F:GO:0004519; C:GO:0005739; C:GO:0030018; P:GO:0031426; C:GO:0031673; P:GO:0032981; P:GO:0033617; P:GO:0034551; P:GO:0044528; P:GO:0070129; P:GO:0097222; P:GO:1903108; P:GO:1903862	F:mRNA 3'-UTR binding; F:endonuclease activity; C:mitochondrion; C:Z disc; P:polycistronic mRNA processing; C:H zone; P:mitochondrial respiratory chain complex I assembly; P:mitochondrial respiratory chain complex IV assembly; P:mitochondrial respiratory chain complex III assembly; P:regulation of mitochondrial mRNA stability; P:regulation of mitochondrial translation; P:mitochondrial mRNA polyad…						NP_523596.2 bicoid stability factor [Drosophila melanogaster]		769	6595	11011	1473	1596	1866	1965	3746	3468	4227	2167	1941	2667	4410		16.3751	209.894	51.0927	62.9316	74.8595	53.2088	54.0954	62.5147	65.329	65.4247	44.1196	40.5255	30.872	238.635
SBULL_13068.mrna1	1308	pre-mRNA-splicing factor CWC22 homolog	4	F:GO:0003723; P:GO:0006397; P:GO:0008380; C:GO:0016607	F:RNA binding; P:mRNA processing; P:RNA splicing; C:nuclear speck						NP_647717.1 uncharacterized protein Dmel_CG9004 [Drosophila melanogaster]		254	315	2563	72	296	238	213	503	478	486	671	645	1012	190		7.91113	14.8561	17.1774	4.92869	21.2299	11.4347	9.07494	13.1135	13.6176	11.9372	20.9107	21.1411	17.7558	16.9396
SBULL_1308.mrna1	152	40S ribosomal protein S14	3	P:GO:0002181; F:GO:0003735; C:GO:0022627	P:cytoplasmic translation; F:structural constituent of ribosome; C:cytosolic small ribosomal subunit						NP_727218.1 ribosomal protein S14a, isoform A [Drosophila melanogaster]		4627	5444	40040	6882	9544	6538	3877	13183	12140	19607	14404	12785	20616	24207		1077.32	1919.61	2192.39	4029.62	4999.61	2307.56	1414.76	3502.18	3649.46	4827.66	4682.33	4237.53	3807.07	17795.9
SBULL_13082.mrna1	222	ras-related protein Rab-5B	25	F:GO:0003924; F:GO:0005525; C:GO:0005769; C:GO:0005938; P:GO:0007220; P:GO:0007298; P:GO:0007349; P:GO:0008285; P:GO:0016189; P:GO:0016348; P:GO:0030100; P:GO:0032482; P:GO:0032509; P:GO:0034058; P:GO:0035088; P:GO:0035220; P:GO:0046664; P:GO:0048227; P:GO:0048488; P:GO:0048675; P:GO:0048803; P:GO:0048813; P:GO:0050803; P:GO:0061883; C:GO:0098793	F:GTPase activity; F:GTP binding; C:early endosome; C:cell cortex; P:Notch receptor processing; P:border follicle cell migration; P:cellularization; P:negative regulation of cell proliferation; P:synaptic vesicle to endosome fusion; P:imaginal disc-derived leg joint morphogenesis; P:regulation of endocytosis; P:Rab protein signal transduction; P:endosome transport via multivesicular body sorting …	EC:3.6.1.15	Nucleoside-triphosphate phosphatase				NP_722799.1 Rab5, isoform F [Drosophila melanogaster]		618	607	5541	744	1897	983	689	1463	1648	2674	2011	1974	4120	511		103.986	155.417	194.031	245.556	580.253	221.672	150.602	211.95	270.166	359.047	356.497	356.799	414.905	221.887
SBULL_13087.mrna1	411	MKRN2 opposite strand protein									NP_608669.1 uncharacterized protein Dmel_CG9967, isoform A [Drosophila melanogaster]		20	32	499	17	63	26	12	122	114	199	240	117	314	22		1.57328	3.85475	8.83439	2.83656	8.00598	2.88193	1.18155	7.93439	8.38964	11.9952	19.0994	9.49352	14.1953	4.52579
SBULL_13094.mrna1	52	---NA---											0	0	3	1	0	0	0	5	12	8	7	2	11	0		0	0	3.3908	280.916	0	0	0	29.8744	81.1326	44.3017	51.1778	14.9089	45.6861	0
SBULL_13099.mrna1	229	protein grindelwald	1	C:GO:0016020	C:membrane						NP_609880.2 grindelwald, isoform B [Drosophila melanogaster]		110	71	608	23	23	226	54	191	159	220	253	259	424	25		12.7998	12.7539	20.7834	7.02865	4.53727	28.8062	4.9726	26.4675	24.9322	28.2555	42.8997	44.7782	40.842	10.4266
SBULL_13103.mrna1	46	---NA---											0	0	13	1	0	0	0	9	18	26	17	17	32	1		0	0	16.4557	0	0	0	0	86.7156	196.251	232.182	200.428	204.358	214.322	18.196
SBULL_13105.mrna1	96	---NA---											0	0	0	0	0	0	0	0	0	1	0	0	1	0		0	0	0.34236	0	0	0	0	20.262	16.9838	21.5617	11.0193	17.7894	7.30314	0
SBULL_13107.mrna1	764	basic-leucine zipper transcription factor A isoform X1									NP_724113.1 uncharacterized protein Dmel_CG10283, isoform B [Drosophila melanogaster]		822	18907	11167	275	557	304	539	868	1474	1041	1142	872	1527	116		32.4866	1129.64	100.241	20.8294	46.255	15.6295	27.4678	27.8184	53.4558	30.9218	44.7851	34.8672	34.0184	12.0347
SBULL_13114.mrna1	47	---NA---											0	1	72	0	0	0	0	31	41	30	28	24	39	0		0	561.335	124.087	0	0	0	0	274.317	410.544	246.044	303.182	264.966	239.893	0
SBULL_13117.mrna1	2392	chondroitin sulfate proteoglycan 4	9	F:GO:0005515; C:GO:0005927; C:GO:0016021; P:GO:0016203; C:GO:0030018; C:GO:0043034; P:GO:0045214; C:GO:0051286; P:GO:0051491	F:protein binding; C:muscle tendon junction; C:integral component of membrane; P:muscle attachment; C:Z disc; C:costamere; P:sarcomere organization; C:cell tip; P:positive regulation of filopodium assembly						NP_609881.3 kon-tiki, isoform B [Drosophila melanogaster]		49	89	10282	83	29	31	138	734	659	553	887	454	884	84		0.607946	1.59976	28.0161	2.0122	0.793881	0.513539	2.16044	7.04473	7.15713	4.9192	10.4171	5.43641	5.8977	2.65208
SBULL_13132.mrna1	46	---NA---											0	0	9	0	0	0	0	4	2	3	4	5	8	0		0	0	4.11393	0	0	0	0	38.5402	21.8057	26.7902	47.1595	60.1052	53.5805	0
SBULL_13141.mrna1	526	UDP-glucuronosyltransferase 2B13	3	P:GO:0008152; F:GO:0015020; C:GO:0016021	P:metabolic process; F:glucuronosyltransferase activity; C:integral component of membrane	EC:2.4.1.17	Glucuronosyltransferase				NP_609882.1 uncharacterized protein Dmel_CG10178, isoform A [Drosophila melanogaster]		192	40	30	483	301	569	211	19	34	51	69	54	160	0		11.9592	3.73974	0.412412	60.5105	41.1103	47.4076	17.0205	0.925387	1.87384	2.30219	4.11219	3.28134	5.41691	0
SBULL_13148.mrna1	1357	peroxidasin homolog	5	F:GO:0004601; P:GO:0006979; F:GO:0020037; P:GO:0055114; P:GO:0098869	F:peroxidase activity; P:response to oxidative stress; F:heme binding; P:oxidation-reduction process; P:cellular oxidant detoxification	EC:1.11.1.7	Peroxidase				NP_609883.1 uncharacterized protein Dmel_CG10211, isoform A [Drosophila melanogaster]		273	420	27658	647	445	629	279	4190	6377	2531	329	309	409	614		6.09236	14.0558	134.928	28.8015	20.3733	18.719	8.00854	72.4869	124.838	40.5825	6.9646	6.66948	4.91848	34.7495
SBULL_1315.mrna1	174	uncharacterized protein LOC111684202	3	F:GO:0005506; P:GO:0016226; F:GO:0051536	F:iron ion binding; P:iron-sulfur cluster assembly; F:iron-sulfur cluster binding								3	20	145	1	11	0	0	14	11	14	67	65	57	2		1.54683	9.71739	10.5152	0.527907	7.29045	0	0	5.26254	6.19317	4.68239	22.1518	29.1518	14.0472	1.81436
SBULL_1316.mrna1	41	CG11699-RA protein	1	C:GO:0016021	C:integral component of membrane						NP_572728.1 uncharacterized protein Dmel_CG11699, isoform A [Drosophila melanogaster]		6	11	21	4	43	24	13	131	147	192	100	106	238	5		0	0	13.2637	0	0	0	0	2010.99	2553.52	2731.74	1878.42	2030.17	2539.67	188.349
SBULL_13161.mrna1	49	---NA---											2	1	296	4	9	1	0	107	131	56	7	10	7	3		95.3438	0	264.204	0	1659.46	0	0	804.156	1114.07	390.073	64.3738	93.7658	36.5693	39.331
SBULL_1317.mrna1	281	NFU1 iron-sulfur cluster scaffold homolog, mitochondrial	4	F:GO:0005506; C:GO:0005739; P:GO:0016226; F:GO:0051536	F:iron ion binding; C:mitochondrion; P:iron-sulfur cluster assembly; F:iron-sulfur cluster binding						NP_996529.1 uncharacterized protein Dmel_CG33502 [Drosophila melanogaster]		403	228	1622	616	884	725	924	578	385	765	311	283	689	409		53.0342	45.2203	45.8436	164.226	255.249	128.265	158.588	60.5378	45.6294	74.2611	39.8579	36.9805	50.1627	131.871
SBULL_13171.mrna1	457	FAS-associated factor 2	3	F:GO:0003674; C:GO:0005575; P:GO:0008150	F:molecular_function; C:cellular_component; P:biological_process						NP_477388.1 Fas-associated factor 2, isoform A [Drosophila melanogaster]		419	326	1154	169	285	316	282	478	461	528	604	545	862	138		30.6559	35.7002	17.4443	24.0103	45.0413	30.6444	26.459	27.4107	29.9142	28.0625	42.3822	38.9921	34.3607	25.1659
SBULL_13175.mrna1	2004	uncharacterized protein LOC111678655	3	F:GO:0003674; C:GO:0005575; P:GO:0008150	F:molecular_function; C:cellular_component; P:biological_process						NP_608555.2 uncharacterized protein Dmel_CG15824, isoform B [Drosophila melanogaster]		1789	43	72	58	4	7	51	600	250	132	6	36	197	3		26.1245	0.959731	0.233916	1.69926	0.131358	0.139139	0.979415	6.91277	3.25931	1.40953	0.0845876	0.517477	1.57772	0.113543
SBULL_13190.mrna1	1511	ring canal kelch protein isoform X1	3	F:GO:0004842; P:GO:0016567; C:GO:0031463	F:ubiquitin-protein transferase activity; P:protein ubiquitination; C:Cul3-RING ubiquitin ligase complex						NP_476589.4 kelch, isoform B [Drosophila melanogaster]		439	1526	4342	399	536	258	741	3077	2610	3568	2748	3366	4384	399		8.75801	45.5319	19.0689	15.9088	23.4512	6.8742	19.002	47.5631	45.6529	51.1174	51.9774	64.915	47.1059	20.2034
SBULL_132.mrna1	235	uncharacterized protein LOC111684293	1	C:GO:0016021	C:integral component of membrane						NP_649628.2 osiris 9 [Drosophila melanogaster]		10	4	30833	20	14	53	20	2300	6030	2226	76	21	688	32		1.00186	0.753688	1031.86	4.40788	3.65129	9.19254	2.61705	307.265	911.563	275.62	12.4238	3.50019	63.8904	12.9088
SBULL_13206.mrna1	235	peptidyl-prolyl cis-trans isomerase, rhodopsin-specific isozyme	15	P:GO:0000413; F:GO:0003755; C:GO:0005788; P:GO:0006458; P:GO:0006491; P:GO:0006517; P:GO:0007601; P:GO:0007603; F:GO:0016018; C:GO:0016021; C:GO:0016028; P:GO:0016063; C:GO:0031410; C:GO:0031965; P:GO:0070059	P:protein peptidyl-prolyl isomerization; F:peptidyl-prolyl cis-trans isomerase activity; C:endoplasmic reticulum lumen; P:'de novo' protein folding; P:N-glycan processing; P:protein deglycosylation; P:visual perception; P:phototransduction, visible light; F:cyclosporin A binding; C:integral component of membrane; C:rhabdomere; P:rhodopsin biosynthetic process; C:cytoplasmic vesicle; C:nuclear mem…	EC:5.2.1.8	Peptidylprolyl isomerase				NP_476656.1 neither inactivation nor afterpotential A [Drosophila melanogaster]		2	340	1945	30	77	8	2	10	11	26	18	3	8	1		0.333953	85.1668	69.4402	10.172	27.7498	1.79367	0.436176	1.33593	1.66288	3.21928	2.94247	0.500027	0.742911	0.403401
SBULL_13211.mrna1	1500	dual 3',5'-cyclic-AMP and -GMP phosphodiesterase 11 isoform X1	6	F:GO:0004115; P:GO:0007165; P:GO:0046058; P:GO:0046068; F:GO:0046872; F:GO:0047555	F:3',5'-cyclic-AMP phosphodiesterase activity; P:signal transduction; P:cAMP metabolic process; P:cGMP metabolic process; F:metal ion binding; F:3',5'-cyclic-GMP phosphodiesterase activity	EC:3.1.4.17; EC:3.1.4.35	3',5'-cyclic-nucleotide phosphodiesterase; 3',5'-cyclic-GMP phosphodiesterase				NP_609885.2 phosphodiesterase 11, isoform B [Drosophila melanogaster]		521	2577	3551	744	671	904	4195	598	618	925	615	622	784	302		10.2523	76.9295	15.5674	29.1211	28.1969	23.0626	107.258	9.31467	10.8928	13.3539	11.7218	12.0877	8.48877	15.4079
SBULL_13212.mrna1	174	---NA---											31	15	20	26	72	76	32	30	18	50	5	13	21	5		7.99197	5.83043	0.955929	12.6698	38.6954	25.7022	10.1769	6.31504	4.28758	9.75497	1.28789	3.41418	3.07282	3.02394
SBULL_1322.mrna1	910	ATP-dependent RNA helicase dbp2	2	F:GO:0003676; F:GO:0005524	F:nucleic acid binding; F:ATP binding						NP_572424.1 maheshvara, isoform B [Drosophila melanogaster]		14612	7559	16370	1944	1864	1860	2993	6419	5730	3631	4851	4547	4891	735		487.984	379.085	122.077	127.741	139.638	83.6262	131.117	170.049	171.769	89.1524	157.25	150.286	90.067	63.2812
SBULL_13234.mrna1	266	cytochrome b561 domain-containing protein 2-like	2	C:GO:0016021; P:GO:0055114	C:integral component of membrane; P:oxidation-reduction process						NP_609990.1 uncharacterized protein Dmel_CG13077, isoform A [Drosophila melanogaster]		14	6	22	1	0	13	7	0	0	3	10	48	22	4		1.98268	1.27773	0.622188	0.28691	0	2.46979	1.29212	0	0	0.313287	1.37871	6.74759	1.72308	1.38002
SBULL_13236.mrna1	700	protein ref(2)P	2	F:GO:0005488; P:GO:0009987	F:binding; P:cellular process						NP_476700.1 refractory to sigma P, isoform A [Drosophila melanogaster]		653	1309	4684	669	359	495	741	692	604	706	787	883	1165	358		73.3017	215.547	106.483	121.368	112.04	110.768	156.788	117.813	116.501	108.539	151.806	171.295	128.583	97.0072
SBULL_13246.mrna1	49	---NA---											1	1	52	0	3	0	0	31	40	41	53	54	80	1		0	0	40.2596	0	276.577	0	0	232.98	340.174	285.589	487.402	506.335	417.935	13.1103
SBULL_13253.mrna1	144	NADH dehydrogenase [ubiquinone] 1 beta subcomplex subunit 9	2	C:GO:0005747; P:GO:0006120	C:mitochondrial respiratory chain complex I; P:mitochondrial electron transport, NADH to ubiquinone						NP_609642.1 NADH dehydrogenase (ubiquinone) B22 subunit, isoform A [Drosophila melanogaster]		903	811	3832	3828	4318	4040	4459	1108	824	1919	630	590	1049	1107		285.442	370.667	199.967	2393.42	2314.98	1703.47	1802.53	325.348	273.792	522.257	226.362	216.147	214.115	883.736
SBULL_13256.mrna1	297	cytochrome b561 domain-containing protein 2-like	2	C:GO:0016021; P:GO:0055114	C:integral component of membrane; P:oxidation-reduction process						NP_609990.1 uncharacterized protein Dmel_CG13077, isoform A [Drosophila melanogaster]		254	230	264	95	145	247	75	69	79	127	99	246	451	21		31.1061	41.9499	6.89466	23.6227	37.7356	40.2172	12.0007	6.72182	8.70862	11.4668	11.8012	29.8993	30.5405	6.32897
SBULL_13258.mrna1	103	---NA---											428	296	35	55	46	547	151	35	24	32	36	26	42	0		82.2074	77.0633	3.93215	30.0075	26.8292	117.412	27.8283	21.7119	16.8471	18.3984	27.3266	20.1229	18.1109	0
SBULL_13261.mrna1	200	cytochrome b561 domain-containing protein 2-like	2	C:GO:0016021; P:GO:0055114	C:integral component of membrane; P:oxidation-reduction process						NP_001260592.1 uncharacterized protein Dmel_CG13077, isoform B [Drosophila melanogaster]		1	1	0	0	9	0	0	0	3	0	0	2	0	1		0.209283	0.315187	0	0	4.10873	0	0	0	0.5738	0	0	0.421767	0	0.498694
SBULL_13283.mrna1	239	probable dolichol-phosphate mannosyltransferase	1	F:GO:0016757	F:transferase activity, transferring glycosyl groups						NP_609980.1 uncharacterized protein Dmel_CG10166 [Drosophila melanogaster]		219	108	1296	87	96	106	51	394	330	425	416	411	791	174		35.4157	26.2723	45.1149	28.4915	33.5544	23.0071	10.868	51.4042	48.7193	51.3916	66.4126	66.9009	71.7367	68.6915
SBULL_13285.mrna1	278	DNA-binding protein RFXANK	3	F:GO:0003712; C:GO:0005634; P:GO:0006357	F:transcription coregulator activity; C:nucleus; P:regulation of transcription by RNA polymerase II						NP_609333.1 uncharacterized protein Dmel_CG5846, isoform A [Drosophila melanogaster]		31	52	195	27	31	40	28	85	85	76	80	65	133	27		3.34393	9.45151	5.43824	6.22809	6.74017	5.91969	4.52994	9.02983	10.218	7.48299	10.3993	8.61513	9.82142	8.82089
SBULL_13286.mrna1	257	protein spitz	7	P:GO:0002009; P:GO:0007399; C:GO:0016020; P:GO:0030154; P:GO:0035295; P:GO:0048513; P:GO:0050794	P:morphogenesis of an epithelium; P:nervous system development; C:membrane; P:cell differentiation; P:tube development; P:animal organ development; P:regulation of cellular process						NP_599120.2 spitz, isoform B [Drosophila melanogaster]		112	1655	1463	89	111	183	234	362	436	473	591	466	813	137		14.2225	323.966	39.4934	21.3229	27.2427	27.8312	32.2651	42.7303	58.2369	51.7475	85.3629	68.6279	66.7083	49.3394
SBULL_13299.mrna1	81	---NA---											24	19	114	2	5	31	8	49	33	45	61	59	146	0		7.53753	2.34228	7.21408	3.48808	3.06318	8.51812	2.21037	61.0976	46.5615	52.0046	93.0707	91.7843	126.545	0
SBULL_13301.mrna1	302	Ref(2)P protein	5	F:GO:0005488; C:GO:0005737; P:GO:0007005; C:GO:0043231; P:GO:0044248	F:binding; C:cytoplasm; P:mitochondrion organization; C:intracellular membrane-bounded organelle; P:cellular catabolic process						NP_476700.1 refractory to sigma P, isoform A [Drosophila melanogaster]		1	12	43	3	5	2	1	4	7	12	12	10	23	2		0.120389	2.17131	1.08564	0.730278	1.31984	0.322755	0.156646	0.381343	0.755159	1.06032	1.39988	1.18944	1.52421	0.590711
SBULL_13305.mrna1	649	serine/threonine-protein phosphatase 1 regulatory subunit 10 isoform X1	3	F:GO:0008157; P:GO:0010467; P:GO:0048589	F:protein phosphatase 1 binding; P:gene expression; P:developmental growth						NP_001259850.1 PNUTS, isoform E [Drosophila melanogaster]		135	256	5364	96	231	124	141	353	363	410	331	362	532	207		6.59803	18.6192	56.8795	9.29831	24.6089	8.03148	8.91798	13.5527	15.7704	14.5893	15.5501	17.3399	14.1979	25.6116
SBULL_13316.mrna1	101	DET1- and DDB1-associated protein 1	1	P:GO:0032434	P:regulation of proteasomal ubiquitin-dependent protein catabolic process						NP_723812.1 uncharacterized protein Dmel_CG31855, isoform A [Drosophila melanogaster]		544	33	310	57	47	35	29	249	142	166	138	100	231	30		378.856	32.652	39.5644	80.7047	57.8502	34.4386	28.3274	162.68	104.98	100.518	110.324	81.5123	104.908	44.565
SBULL_13317.mrna1	441	hypothetical protein FF38_04097									NP_609984.2 uncharacterized protein Dmel_CG13082 [Drosophila melanogaster]		15	4	3747	25	15	35	58	13131	10141	14096	31754	3853	46684	62		0.915026	0.343471	60.5176	3.68549	2.01144	3.46965	5.23968	785.295	686.279	781.325	2323.74	287.489	1940.73	11.7713
SBULL_13323.mrna1	498	ethanolaminephosphotransferase 1	3	P:GO:0008654; C:GO:0016021; F:GO:0016780	P:phospholipid biosynthetic process; C:integral component of membrane; F:phosphotransferase activity, for other substituted phosphate groups						NP_788074.1 uncharacterized protein Dmel_CG33116 [Drosophila melanogaster]		112	168	1187	34	56	33	33	103	87	156	83	72	121	97		7.35781	16.7168	16.864	4.40127	7.8731	2.92642	2.83378	5.34326	5.10709	7.50058	5.26868	4.66004	4.36332	16.0635
SBULL_13327.mrna1	62	---NA---											1	16	77	1	13	1	0	16	17	13	6	15	12	7		13.1314	463.051	43.9035	42.3887	284.467	19.316	0	49.6606	59.7071	37.397	22.7876	58.086	25.8902	30.6138
SBULL_13334.mrna1	1018	centrosomal protein of 104 kDa isoform X1									NP_609981.1 uncharacterized protein Dmel_CG10137 [Drosophila melanogaster]		115	58	145	29	16	18	18	60	60	74	109	48	94	25		3.35624	2.63039	0.936036	1.63724	1.06632	0.727155	0.585847	1.40878	1.59415	1.61037	3.13165	1.40612	1.5342	1.91182
SBULL_13346.mrna1	44	---NA---											0	1	2	0	0	0	0	2	5	3	11	0	1	0		0	0	12.3161	0	0	0	0	23.0193	65.1204	32.0025	154.921	0	8.00063	0
SBULL_13350.mrna1	81	hypothetical protein FF38_04101											875	3513	212	887	824	1888	1017	489	362	628	308	289	787	1		987.855	6149.71	44.3614	1941.76	2149.09	2454.7	1171.71	594.11	497.681	707.161	457.892	438.07	664.653	2.35327
SBULL_13352.mrna1	394	odorant receptor 45a-like	6	F:GO:0004984; F:GO:0005549; C:GO:0005886; P:GO:0007165; C:GO:0016021; P:GO:0050911	F:olfactory receptor activity; F:odorant binding; C:plasma membrane; P:signal transduction; C:integral component of membrane; P:detection of chemical stimulus involved in sensory perception of smell						NP_525029.2 odorant receptor 1a [Drosophila melanogaster]		1	0	2	1	0	0	0	2	0	1	1	1	6	0		0.0870423	0	0	0.175464	0	0	0	0.136856	0	0.0634211	0.0837312	0.085373	0.285395	0
SBULL_13354.mrna1	81	hypothetical protein FF38_04114											62	398	59	31	65	364	464	79	69	169	71	30	133	1		91.9578	929.887	12.825	104.642	177.665	770.89	1023.4	98.5044	97.3559	195.306	108.328	46.67	115.277	2.40005
SBULL_13358.mrna1	73	hypothetical protein FF38_04114											103	343	53	35	50	128	41	135	62	199	69	96	242	0		41.2602	119.484	9.60086	33.1087	64.557	60.7994	25.1092	236.63	122.974	323.288	147.992	209.94	294.858	0
SBULL_13360.mrna1	95	hypothetical protein FF38_04114											1837	7289	308	1195	499	5444	1446	676	553	1093	635	574	1369	11		1599.44	9696.78	49.3216	2260.23	912.737	6521.68	1747.46	522.418	483.594	782.875	600.481	553.44	735.422	18.4927
SBULL_13362.mrna1	226	cytochrome b561 domain-containing protein 2	2	C:GO:0016021; P:GO:0055114	C:integral component of membrane; P:oxidation-reduction process						NP_724208.1 uncharacterized protein Dmel_CG10165, isoform B [Drosophila melanogaster]		120	253	972	134	169	165	157	317	305	595	376	177	845	196		21.1358	66.7951	35.0209	47.6086	62.7462	39.0359	36.1442	44.762	48.7343	77.8696	64.9669	31.1825	82.9409	83.1526
SBULL_13366.mrna1	260	---NA---											3	33	7	2	3	4	15	879	994	1607	976	1044	2796	0		0.291817	5.92448	0.19226	0.295715	0.958346	0.587304	2.47317	102.135	130.695	173.063	138.768	151.347	225.832	0
SBULL_13369.mrna1	386	---NA---											268	705	172	103	131	912	366	160	197	339	93	103	314	16		23.9031	94.4394	3.3214	18.1629	25.4689	108.912	42.3674	11.2239	15.6378	22.0407	7.98293	9.01467	15.3115	3.53774
SBULL_13373.mrna1	192	uncharacterized protein LOC111686416									NP_609985.1 uncharacterized protein Dmel_CG13081, isoform A [Drosophila melanogaster]		0	0	1	0	0	0	0	2660	1509	2135	11876	157	17666	0		0	0	0.0485641	0	0	0	0	478.627	307.248	356.053	2614.81	35.2454	2209.61	0
SBULL_13374.mrna1	394	Protein I'm not dead yet	1	P:GO:0006810	P:transport						NP_730364.1 I'm not dead yet, isoform C [Drosophila melanogaster]		257	0	0	15	0	0	0	180	93	49	0	34	63	0		21.5865	0	0	2.63197	0	0	0	12.317	7.20113	3.10763	0	2.90268	2.99665	0
SBULL_13383.mrna1	372	aldose 1-epimerase	4	F:GO:0004034; P:GO:0006006; F:GO:0030246; P:GO:0033499	F:aldose 1-epimerase activity; P:glucose metabolic process; F:carbohydrate binding; P:galactose catabolic process via UDP-galactose	EC:5.1.3.3	Aldose 1-epimerase				NP_648026.1 uncharacterized protein Dmel_CG10467 [Drosophila melanogaster]		94	131	3043	354	403	654	272	517	510	1138	413	645	1169	38		7.27091	14.8417	57.0271	53.2088	65.7122	63.9128	28.5614	37.9377	42.3483	77.397	37.0839	59.0511	59.629	8.76955
SBULL_13390.mrna1	287	elongation of very long chain fatty acids protein F	6	P:GO:0006633; C:GO:0016021; F:GO:0102336; F:GO:0102337; F:GO:0102338; F:GO:0102756	P:fatty acid biosynthetic process; C:integral component of membrane; F:3-oxo-arachidoyl-CoA synthase activity; F:3-oxo-cerotoyl-CoA synthase activity; F:3-oxo-lignoceronyl-CoA synthase activity; F:very-long-chain 3-ketoacyl-CoA synthase activity	EC:2.3.1.199	Very-long-chain 3-oxoacyl-CoA synthase				NP_651104.1 uncharacterized protein Dmel_CG6660 [Drosophila melanogaster]		250	23	624	154	99	275	1	23	32	51	26	22	76	53		29.2775	4.24674	16.6273	36.6367	26.4538	45.6277	0.167191	2.34293	3.68865	4.81508	3.24086	2.79604	5.38156	16.6524
SBULL_13396.mrna1	302	elongation of very long chain fatty acids protein AAEL008004-like	3	P:GO:0006631; C:GO:0016020; F:GO:0016747	P:fatty acid metabolic process; C:membrane; F:transferase activity, transferring acyl groups other than amino-acyl groups						NP_651104.1 uncharacterized protein Dmel_CG6660 [Drosophila melanogaster]		502	341	132	610	594	506	0	6	2	41	2	0	1	0		60.4354	61.7015	3.49522	148.49	156.797	81.657	0	0.572014	0.21576	3.62277	0.233314	0	0.0662701	0
SBULL_13400.mrna1	253	3-hydroxyacyl-CoA dehydrogenase type-2	17	F:GO:0003857; F:GO:0004303; C:GO:0005829; P:GO:0006631; P:GO:0006637; P:GO:0008205; P:GO:0008209; P:GO:0008210; F:GO:0018454; F:GO:0030283; C:GO:0030678; F:GO:0047015; F:GO:0047022; F:GO:0047035; P:GO:0055114; P:GO:0090502; P:GO:0090646	F:3-hydroxyacyl-CoA dehydrogenase activity; F:estradiol 17-beta-dehydrogenase activity; C:cytosol; P:fatty acid metabolic process; P:acyl-CoA metabolic process; P:ecdysone metabolic process; P:androgen metabolic process; P:estrogen metabolic process; F:acetoacetyl-CoA reductase activity; F:testosterone dehydrogenase [NAD(P)] activity; C:mitochondrial ribonuclease P complex; F:3-hydroxy-2-methylbu…	EC:1.1.1.239; EC:1.1.1.36; EC:1.1.1.35; EC:1.1.1.201; EC:1.1.1.178; EC:1.1.1.62; EC:1.1.1.51	3-alpha-(17-beta)-hydroxysteroid dehydrogenase (NAD(+)); Acetoacetyl-CoA reductase; 3-hydroxyacyl-CoA dehydrogenase; 7-beta-hydroxysteroid dehydrogenase (NADP(+)); 3-hydroxy-2-methylbutyryl-CoA dehydrogenase; 17-beta-estradiol 17-dehydrogenase; 3(or 17)-beta-hydroxysteroid dehydrogenase				NP_523396.1 scully, isoform A [Drosophila melanogaster]		728	1603	9462	697	1947	964	1259	4198	3996	6486	5829	4415	7355	1440		103.002	318.94	278.9	188.004	582.309	190.393	238.138	506.246	545.293	724.932	860.138	664.26	616.544	527.447
SBULL_13405.mrna1	905	leucine-rich repeat neuronal protein 3	3	C:GO:0016021; C:GO:0030424; P:GO:0050794	C:integral component of membrane; C:axon; P:regulation of cellular process						NP_001263151.1 kek6, isoform B [Drosophila melanogaster]		0	1	806	16	11	5	8	71	40	96	40	27	68	18		0	0.0514344	5.97321	1.03186	0.75559	0.229092	0.354443	1.89213	1.20625	2.37118	1.30439	0.897726	1.25969	1.55883
SBULL_1341.mrna1	574	heparan-alpha-glucosaminide N-acetyltransferase	4	C:GO:0005765; P:GO:0007041; C:GO:0016021; F:GO:0016746	C:lysosomal membrane; P:lysosomal transport; C:integral component of membrane; F:transferase activity, transferring acyl groups						NP_572198.1 uncharacterized protein Dmel_CG6903, isoform A [Drosophila melanogaster]		130	59	2172	55	70	60	122	927	1153	731	442	599	986	92		6.94333	4.7443	25.6363	6.01436	7.95092	4.37856	8.62237	40.8659	57.5169	29.8675	23.8428	32.9455	30.2148	12.8764
SBULL_13419.mrna1	566	transcriptional protein SWT1									NP_996499.1 uncharacterized protein Dmel_CG7206, isoform B [Drosophila melanogaster]		1092	79	725	62	218	42	52	342	226	205	158	163	307	43		58.3778	6.2828	8.96332	6.45616	26.754	2.91433	3.86026	15.3189	11.455	8.51055	8.65993	9.10916	9.5588	6.17914
SBULL_1342.mrna1	200	synaptobrevin homolog YKT6	2	C:GO:0016021; P:GO:0016192	C:integral component of membrane; P:vesicle-mediated transport						NP_572423.1 YKT6 v-SNARE [Drosophila melanogaster]		230	4985	2163	97	174	186	222	375	293	493	398	407	573	91		43.3215	1385.25	85.5318	34.1305	73.5005	48.6912	54.3094	63.3849	56.0412	77.2329	82.3176	85.8296	67.3243	45.3811
SBULL_13425.mrna1	65	protein CASC1									NP_573264.1 uncharacterized protein Dmel_CG15373, isoform A [Drosophila melanogaster]		0	0	2	0	0	0	0	0	0	0	0	0	1	0		0	0	0.542258	0	0	0	0	0	0	0	0	0	1.75671	0
SBULL_13438.mrna1	1267	type I inositol 3,4-bisphosphate 4-phosphatase	4	C:GO:0005737; P:GO:0007165; F:GO:0016316; P:GO:0036092	C:cytoplasm; P:signal transduction; F:phosphatidylinositol-3,4-bisphosphate 4-phosphatase activity; P:phosphatidylinositol-3-phosphate biosynthetic process	EC:3.1.3.66; EC:3.1.3.41	Phosphatidylinositol-3,4-bisphosphate 4-phosphatase; 4-nitrophenylphosphatase				NP_996434.2 uncharacterized protein Dmel_CG42271, isoform C [Drosophila melanogaster]		370	1015	2339	266	372	241	764	1023	1021	1127	775	926	1416	219		8.87596	36.5157	12.3748	12.7899	19.6767	7.72247	23.662	19.0313	21.4933	19.432	17.642	21.4927	18.3112	13.3157
SBULL_13444.mrna1	409	potassium voltage-gated channel protein Shaker isoform X5	5	F:GO:0005249; C:GO:0008076; P:GO:0034765; P:GO:0051260; P:GO:0071805	F:voltage-gated potassium channel activity; C:voltage-gated potassium channel complex; P:regulation of ion transmembrane transport; P:protein homooligomerization; P:potassium ion transmembrane transport						NP_001259666.2 shaker, isoform S [Drosophila melanogaster]		25	2	75	35	23	66	61	46	31	65	15	32	58	52		2.08203	0.250129	1.35846	5.87388	4.02594	7.35795	6.59023	3.0092	2.3688	4.00165	1.20071	2.61175	2.63745	10.7572
SBULL_13445.mrna1	290	potassium voltage-gated channel protein Shaker isoform X1	15	P:GO:0001508; F:GO:0005249; P:GO:0007637; C:GO:0008076; P:GO:0008345; P:GO:0009584; P:GO:0034765; P:GO:0045838; P:GO:0045938; P:GO:0048047; P:GO:0048675; P:GO:0051260; P:GO:0060025; P:GO:0071805; P:GO:1903351	P:action potential; F:voltage-gated potassium channel activity; P:proboscis extension reflex; C:voltage-gated potassium channel complex; P:larval locomotory behavior; P:detection of visible light; P:regulation of ion transmembrane transport; P:positive regulation of membrane potential; P:positive regulation of circadian sleep/wake cycle, sleep; P:mating behavior, sex discrimination; P:axon extens…						NP_728123.1 shaker, isoform E [Drosophila melanogaster]		31	4	58	28	16	31	40	34	25	51	10	21	34	22		3.5482	0.571464	1.42092	6.92221	4.16625	4.92725	5.60897	3.41666	2.84281	4.75	1.3526	2.63287	2.375	6.82524
SBULL_13464.mrna1	178	potassium voltage-gated channel protein Shaker-like	5	F:GO:0005249; C:GO:0008076; P:GO:0034765; P:GO:0051260; P:GO:0071805	F:voltage-gated potassium channel activity; C:voltage-gated potassium channel complex; P:regulation of ion transmembrane transport; P:protein homooligomerization; P:potassium ion transmembrane transport						NP_728120.1 shaker, isoform D [Drosophila melanogaster]		59	2	48	21	16	19	23	41	35	45	16	15	31	22		14.6867	0.750464	2.49899	9.16752	8.66824	6.36984	6.54618	8.31661	8.03369	8.4601	3.97134	3.79613	4.37105	12.8838
SBULL_13465.mrna1	1068	protein gone early isoform X1	7	F:GO:0004222; C:GO:0005886; P:GO:0006508; P:GO:0007218; C:GO:0016021; P:GO:0048477; P:GO:2000737	F:metalloendopeptidase activity; C:plasma membrane; P:proteolysis; P:neuropeptide signaling pathway; C:integral component of membrane; P:oogenesis; P:negative regulation of stem cell differentiation	EC:3.4.24	Acting on peptide bonds (peptidases)				NP_573160.1 gone early, isoform A [Drosophila melanogaster]		66	786	3449	174	300	115	98	1372	1160	1533	2142	1924	3102	644		1.81023	33.4858	21.5982	9.91015	18.8749	4.33783	3.52555	30.6033	29.2791	31.6926	58.464	53.5436	48.0971	46.8251
SBULL_13473.mrna1	497	putative fatty acyl-CoA reductase CG5065	5	P:GO:0006629; C:GO:0016021; P:GO:0055114; F:GO:0080019; F:GO:0102965	P:lipid metabolic process; C:integral component of membrane; P:oxidation-reduction process; F:fatty-acyl-CoA reductase (alcohol-forming) activity; F:alcohol-forming fatty acyl-CoA reductase activity	EC:1.2.1.84	Alcohol-forming fatty acyl-CoA reductase				NP_572276.1 uncharacterized protein Dmel_CG4020, isoform A [Drosophila melanogaster]		528	264	312	506	737	630	1	6	10	61	23	116	125	64		35.0133	26.23	4.50051	67.5085	105.799	55.9077	0.0860706	0.311983	0.58839	2.93975	1.4634	7.52534	4.51807	10.6224
SBULL_13478.mrna1	690	longitudinals lacking protein, isoforms H/M/V	2	F:GO:0003677; C:GO:0005634	F:DNA binding; C:nucleus						NP_572279.1 uncharacterized protein Dmel_CG3726, isoform A [Drosophila melanogaster]		137	208	2252	75	551	316	262	169	215	222	633	255	617	148		6.21339	14.364	22.5011	6.93259	55.6423	19.2581	15.596	6.06068	8.72485	7.37885	27.7775	11.4094	15.3809	17.1352
SBULL_13479.mrna1	295	uncharacterized protein LOC111686321									NP_572816.1 uncharacterized protein Dmel_CG15728, isoform A [Drosophila melanogaster]		23	82	472	9	41	15	9	85	46	102	100	124	175	19		2.60408	14.3521	11.8344	2.00654	10.8734	2.16118	1.45257	8.35347	5.11553	9.29071	12.0255	15.204	11.955	5.77331
SBULL_13493.mrna1	408	actin-5C	13	P:GO:0000281; F:GO:0005200; F:GO:0005515; F:GO:0005524; C:GO:0005737; C:GO:0005884; P:GO:0006338; P:GO:0007010; P:GO:0007291; C:GO:0031011; P:GO:0032507; C:GO:0035060; P:GO:0035148	P:mitotic cytokinesis; F:structural constituent of cytoskeleton; F:protein binding; F:ATP binding; C:cytoplasm; C:actin filament; P:chromatin remodeling; P:cytoskeleton organization; P:sperm individualization; C:Ino80 complex; P:maintenance of protein location in cell; C:brahma complex; P:tube formation						NP_727048.1 actin 5C, isoform A [Drosophila melanogaster]		70456	28593	183969	19697	18161	41078	24390	72700	100636	63738	124195	112560	126097	11777		5010.56	3040.21	3196.36	2850.39	2931.23	3950.71	2326.94	4771.28	7473.8	3880	9973	9215.73	5752.91	2440.66
SBULL_1350.mrna1	101	hypothetical protein FF38_10959	3	F:GO:0005506; P:GO:0016226; F:GO:0051536	F:iron ion binding; P:iron-sulfur cluster assembly; F:iron-sulfur cluster binding								17	58	300	69	205	238	56	577	592	789	448	464	830	55		9.60063	58.5485	35.9123	72.7925	275.179	215.748	52.608	376.974	437.665	477.764	358.152	378.217	376.943	80.217
SBULL_13502.mrna1	492	modifier of mdg4 isoform X2	1	F:GO:0003676	F:nucleic acid binding						NP_572277.2 uncharacterized protein Dmel_CG12236, isoform B [Drosophila melanogaster]		355	91	599	74	108	163	204	207	185	204	280	241	392	73		23.5911	9.18144	8.54172	9.46705	15.5215	14.5669	17.5024	10.8904	11.0136	9.94726	18.0254	15.8189	14.3358	12.2538
SBULL_13509.mrna1	177	broad-complex core protein isoforms 1/2/3/4/5 isoform X1	1	F:GO:0003676	F:nucleic acid binding						NP_727050.1 uncharacterized protein Dmel_CG12236, isoform A [Drosophila melanogaster]		5	0	12	2	0	0	0	9	9	13	10	15	17	0		36.1567	292.967	28.7648	48.8141	134.961	67.6387	90.4776	219.035	312.715	359.914	422.821	446.436	518.384	149.937
SBULL_13511.mrna1	1283	actin cytoskeleton-regulatory complex protein PAN1	1	P:GO:0071482	P:cellular response to light stimulus						NP_572487.3 PIP82 [Drosophila melanogaster]		1	5	11	738	479	33	2	29	24	66	8	5	3	0		0.0236748	0.177522	0.057608	34.1647	23.9086	1.01194	0.0611293	0.532394	0.498576	1.123	0.179713	0.114523	0.0382841	0
SBULL_1352.mrna1	427	flocculation protein FLO11 isoform X1	1	F:GO:0046983	F:protein dimerization activity						NP_001162653.1 Mnt, isoform F [Drosophila melanogaster]		118	107	1281	129	175	216	263	212	281	271	189	175	341	35		9.02604	12.6021	21.6464	20.415	30.105	22.8901	26.9013	13.1731	19.758	15.6071	14.3704	13.5668	14.7288	6.89305
SBULL_13525.mrna1	541	serine hydroxymethyltransferase, cytosolic isoform X2	6	F:GO:0004372; F:GO:0008168; P:GO:0019264; F:GO:0030170; P:GO:0032259; P:GO:0035999	F:glycine hydroxymethyltransferase activity; F:methyltransferase activity; P:glycine biosynthetic process from serine; F:pyridoxal phosphate binding; P:methylation; P:tetrahydrofolate interconversion	EC:2.1.2.1	Glycine hydroxymethyltransferase				NP_572278.1 serine hydroxymethyl transferase, isoform A [Drosophila melanogaster]		2840	16185	8075	2303	2993	4743	8093	5785	8008	10321	9201	10434	22727	4049		177.815	1531.59	111.54	281.259	406.111	398.997	657.135	322.432	502.273	537.58	630.39	714.121	867.935	653.422
SBULL_13529.mrna1	415	39S ribosomal protein L38, mitochondrial	3	F:GO:0003735; C:GO:0005762; P:GO:0032543	F:structural constituent of ribosome; C:mitochondrial large ribosomal subunit; P:mitochondrial translation						NP_511152.2 mitochondrial ribosomal protein L38 [Drosophila melanogaster]		570	172	2410	217	266	327	131	502	323	621	424	375	636	555		46.5819	21.022	42.9702	35.6297	47.8541	35.7245	13.8046	32.2717	23.4966	37.0007	33.3533	30.0772	28.4208	112.916
SBULL_13534.mrna1	490	cytoplasmic dynein 1 light intermediate chain 1	12	P:GO:0000226; F:GO:0003777; C:GO:0005635; C:GO:0005737; C:GO:0005813; C:GO:0005868; P:GO:0007409; P:GO:0008088; C:GO:0043005; P:GO:0048477; P:GO:0048814; P:GO:0051028	P:microtubule cytoskeleton organization; F:microtubule motor activity; C:nuclear envelope; C:cytoplasm; C:centrosome; C:cytoplasmic dynein complex; P:axonogenesis; P:axo-dendritic transport; C:neuron projection; P:oogenesis; P:regulation of dendrite morphogenesis; P:mRNA transport	EC:3.6.1.15	Nucleoside-triphosphate phosphatase				NP_727501.1 dynein light intermediate chain, isoform D [Drosophila melanogaster]		934	7400	5759	642	1019	1217	1578	1090	1063	1061	1505	1365	2016	325		57.4639	709.873	82.3731	79.6253	121.631	101.994	133.24	57.6172	63.5834	51.9807	97.3457	90.0215	74.0762	54.635
SBULL_13535.mrna1	47	---NA---											79	503	89	29	65	97	124	38	19	28	25	46	43	0		8672.76	250356	206.811	11930.4	13967.1	8582.3	54532.7	336.259	190.252	229.641	270.698	507.851	264.497	0
SBULL_13538.mrna1	131	40S ribosomal protein S15Aa	3	P:GO:0002181; F:GO:0003735; C:GO:0022627	P:cytoplasmic translation; F:structural constituent of ribosome; C:cytosolic small ribosomal subunit						NP_727693.1 ribosomal protein S15Aa, isoform E [Drosophila melanogaster]		7112	8690	31961	7434	12622	16138	12618	11337	10677	16876	11906	10446	18439	16848		2131.59	3975.48	2489.04	5396.9	7001.91	7452.49	6292.59	3972.15	4233.13	5480.22	5104.44	4566.31	4490.83	15513.7
SBULL_13541.mrna1	1285	neuroglian isoform X1	1	C:GO:0016021	C:integral component of membrane						NP_727274.1 neuroglian, isoform B [Drosophila melanogaster]		3922	903	19314	1205	969	1397	2828	6130	5800	5612	5473	3699	5632	3419		92.3697	31.5827	100.074	56.7058	48.4688	43.5055	83.915	112.352	120.291	95.3322	122.744	84.5849	71.7539	204.729
SBULL_13553.mrna1	169	CKLF-like MARVEL transmembrane domain-containing protein 4	1	C:GO:0016021	C:integral component of membrane						NP_572653.1 uncharacterized protein Dmel_CG15211, isoform A [Drosophila melanogaster]		72	74	1253	318	186	345	310	219	172	383	74	99	95	262		6.74592	12.2084	58.3964	52.5501	58.0704	45.0984	41.228	48.3829	42.9993	78.4237	20.0048	27.2879	14.5893	163.95
SBULL_13559.mrna1	351	V-type proton ATPase subunit d 1	14	C:GO:0000220; C:GO:0005765; C:GO:0005769; P:GO:0006879; P:GO:0007034; P:GO:0007035; P:GO:0007430; F:GO:0008553; P:GO:0008593; P:GO:0015991; C:GO:0016471; C:GO:0033181; P:GO:0036295; F:GO:0046961	C:vacuolar proton-transporting V-type ATPase, V0 domain; C:lysosomal membrane; C:early endosome; P:cellular iron ion homeostasis; P:vacuolar transport; P:vacuolar acidification; P:terminal branching, open tracheal system; F:proton-exporting ATPase activity, phosphorylative mechanism; P:regulation of Notch signaling pathway; P:ATP hydrolysis coupled proton transport; C:vacuolar proton-transporting…	EC:3.6.1.3; EC:3.6.3.6; EC:3.6.1.15	Adenosinetriphosphatase; Proton-exporting ATPase; Nucleoside-triphosphate phosphatase				NP_570080.1 vacuolar H[+] ATPase AC39 subunit 1 [Drosophila melanogaster]		1468	697	4388	1374	1710	1045	1090	2530	2122	2494	1791	1881	3556	3442		138.482	97.786	90.957	201.999	332.751	133.393	136.768	199.431	189.279	182.209	172.752	184.99	194.848	849.11
SBULL_13565.mrna1	195	peroxiredoxin 1	14	F:GO:0004602; F:GO:0005515; C:GO:0005829; P:GO:0006979; P:GO:0007155; P:GO:0007281; P:GO:0008340; P:GO:0008354; F:GO:0008379; P:GO:0042594; P:GO:0042744; P:GO:0045454; P:GO:0055114; P:GO:0098869	F:glutathione peroxidase activity; F:protein binding; C:cytosol; P:response to oxidative stress; P:cell adhesion; P:germ cell development; P:determination of adult lifespan; P:germ cell migration; F:thioredoxin peroxidase activity; P:response to starvation; P:hydrogen peroxide catabolic process; P:cell redox homeostasis; P:oxidation-reduction process; P:cellular oxidant detoxification	EC:1.11.1; EC:1.11.1.15; EC:1.11.1.9; EC:1.11.1.7	Acting on a peroxide as acceptor; Peroxiredoxin; Glutathione peroxidase; Peroxidase				NP_727689.1 thioredoxin peroxidase 1, isoform B [Drosophila melanogaster]		2092	2145	34051	1708	2784	2761	1943	2244	1728	4238	1985	1562	2401	1239		376.742	575.011	1497	581.182	1030.71	677.686	459.34	394.233	343.525	690.068	426.722	342.373	293.214	637.394
SBULL_13573.mrna1	666	cholecystokinin receptor type A-like	4	P:GO:0007186; P:GO:0008344; F:GO:0015054; C:GO:0016021	P:G-protein coupled receptor signaling pathway; P:adult locomotory behavior; F:gastrin receptor activity; C:integral component of membrane						NP_001097021.1 Cholecystokinin-like receptor at 17D1 [Drosophila melanogaster]		0	0	29	8	7	2	5	6	0	13	1	0	6	12		0	0	0.306543	0.768981	0.526836	0.127952	0.309502	0.223808	0	0.449438	0.0456436	0	0.155575	1.44363
SBULL_13585.mrna1	1262	small G protein signaling modulator 2	7	F:GO:0005096; C:GO:0005622; P:GO:0006886; C:GO:0012505; F:GO:0017137; P:GO:0031338; P:GO:0090630	F:GTPase activator activity; C:intracellular; P:intracellular protein transport; C:endomembrane system; F:Rab GTPase binding; P:regulation of vesicle fusion; P:activation of GTPase activity						NP_728346.2 uncharacterized protein Dmel_CG1695 [Drosophila melanogaster]		32	2	38	74	31	7	21	8	2	7	17	25	20	74		0.74676	0.0722521	0.197158	3.37982	1.54032	0.193062	0.62201	0.168132	0.0422788	0.121201	0.388607	0.582687	0.272702	4.51797
SBULL_13603.mrna1	45	---NA---											0	0	2	0	0	0	0	0	0	0	0	0	0	0		0	0	0	0	0	0	0	0	0	0	0	0	0	0
SBULL_13607.mrna1	1123	small G protein signaling modulator 2	8	F:GO:0005096; C:GO:0005622; P:GO:0006886; C:GO:0012505; C:GO:0016021; F:GO:0017137; P:GO:0031338; P:GO:0090630	F:GTPase activator activity; C:intracellular; P:intracellular protein transport; C:endomembrane system; C:integral component of membrane; F:Rab GTPase binding; P:regulation of vesicle fusion; P:activation of GTPase activity						NP_608395.6 uncharacterized protein Dmel_CG32506, isoform C [Drosophila melanogaster]		31	1	36	7	3	1	3	7	9	32	13	9	10	41		0.844579	0.0408612	0.216917	0.382364	0.180183	0.0363962	0.10555	0.147999	0.215322	0.627064	0.336325	0.237406	0.161665	2.82803
SBULL_13620.mrna1	396	probable low-specificity L-threonine aldolase 2	4	C:GO:0005829; P:GO:0006545; P:GO:0006567; F:GO:0008732	C:cytosol; P:glycine biosynthetic process; P:threonine catabolic process; F:L-allo-threonine aldolase activity	EC:4.1.2.5	L-threonine aldolase				NP_651161.1 uncharacterized protein Dmel_CG10184 [Drosophila melanogaster]		163	126	659	313	357	301	166	2816	2512	3311	1465	994	2252	262		13.8434	16.2425	12.1464	53.717	66.5284	34.4031	18.6367	191.518	193.322	208.707	121.918	84.3433	106.465	56.2472
SBULL_13625.mrna1	542	extracellular serine/threonine protein CG31145 isoform X2	4	C:GO:0005576; C:GO:0005794; P:GO:0006468; C:GO:0016021	C:extracellular region; C:Golgi apparatus; P:protein phosphorylation; C:integral component of membrane						NP_001138101.1 uncharacterized protein Dmel_CG31145, isoform C [Drosophila melanogaster]		861	1082	1473	1072	704	2170	1788	188	325	317	167	309	522	88		50.2771	95.6154	18.9923	123.868	85.3197	170.573	137.607	8.84735	17.3071	13.8266	9.61671	18.1427	17.0761	13.2649
SBULL_1363.mrna1	237	protein doublesex-like											197	178	864	207	276	447	373	170	143	222	129	179	270	22		29.1618	39.4123	28.9861	60.2083	82.153	90.2533	74.4415	22.3978	21.3196	27.1089	20.797	29.4238	24.7277	8.76317
SBULL_13635.mrna1	316	PIN2/TERF1-interacting telomerase inhibitor 1 isoform X2	1	F:GO:0003676	F:nucleic acid binding						NP_001286638.1 uncharacterized protein Dmel_CG11180, isoform B [Drosophila melanogaster]		60	83	1908	32	269	155	149	142	124	203	165	179	329	364		6.82543	14.1888	47.0315	7.35606	67.1214	23.6298	22.0426	12.7733	12.6218	16.9244	18.1616	20.0889	20.5719	101.812
SBULL_13638.mrna1	51	---NA---											0	0	0	0	1	0	0	21	10	17	11	7	37	0		0	0	0	0	0	0	0	135.179	72.841	101.424	86.644	56.2182	165.56	0
SBULL_13640.mrna1	47	DNA ligase 1 isoform X1	1	F:GO:0003676	F:nucleic acid binding								0	0	48	0	12	0	0	7	9	23	26	15	39	6		0	0	41.3623	0	0	0	0	61.9425	90.1194	188.634	281.526	165.604	239.893	97.1841
SBULL_13643.mrna1	530	DDB1- and CUL4-associated factor 11									NP_725981.1 uncharacterized protein Dmel_CG9945, isoform B [Drosophila melanogaster]		81	95	704	50	87	36	57	197	168	210	154	160	313	33		5.0022	8.80589	9.3911	5.96179	11.5488	2.89113	4.55846	9.51172	9.17882	9.39751	9.09846	9.6383	10.5051	5.09916
SBULL_13648.mrna1	91	WASH complex subunit 2									NP_611496.1 family with sequence similarity 21 [Drosophila melanogaster]		5	0	13	2	2	1	10	13	4	4	6	7	11	0		0	0	0.975646	0	0	0	2.77691	11.3657	3.95729	3.24126	6.41887	7.63552	6.6851	0
SBULL_13649.mrna1	110	immunoglobulin-binding protein 1	8	C:GO:0000159; F:GO:0004864; C:GO:0005829; P:GO:0007052; P:GO:0007472; P:GO:0009966; P:GO:0043666; F:GO:0051721	C:protein phosphatase type 2A complex; F:protein phosphatase inhibitor activity; C:cytosol; P:mitotic spindle organization; P:wing disc morphogenesis; P:regulation of signal transduction; P:regulation of phosphoprotein phosphatase activity; F:protein phosphatase 2A binding						NP_723811.1 Two A-associated protein of 42kDa [Drosophila melanogaster]		88	34	286	87	35	34	109	190	167	221	241	217	395	19		39.6328	20.0764	25.0328	64.7619	24.3414	20.4841	62.6038	99.751	99.2122	107.537	154.823	142.138	144.153	23.9883
SBULL_13651.mrna1	200	DNA ligase 1	7	F:GO:0003677; F:GO:0003910; F:GO:0005524; P:GO:0006260; P:GO:0006310; P:GO:0051103; P:GO:0071897	F:DNA binding; F:DNA ligase (ATP) activity; F:ATP binding; P:DNA replication; P:DNA recombination; P:DNA ligation involved in DNA repair; P:DNA biosynthetic process	EC:6.5.1.1	DNA ligase (ATP)				NP_611843.2 DNA ligase I [Drosophila melanogaster]		76	360	591	25	71	25	14	173	117	168	204	192	251	57		15.9055	113.467	24.4507	10.2392	32.4133	7.0363	3.84006	29.2416	22.3782	26.3187	42.1929	40.4896	29.4911	27.9269
SBULL_13657.mrna1	209	mucin-5AC isoform X1	4	F:GO:0004867; C:GO:0005615; P:GO:0008150; P:GO:0010951	F:serine-type endopeptidase inhibitor activity; C:extracellular space; P:biological_process; P:negative regulation of endopeptidase activity						NP_610188.2 uncharacterized protein Dmel_CG43366 [Drosophila melanogaster]		0	2	472	3	5	2	2	75	59	45	159	38	177	1		0	0.591643	16.735	1.20019	2.14459	0.528225	0.514486	11.8676	10.5642	6.59955	30.786	7.50192	19.4687	0.470138
SBULL_13658.mrna1	170	mucin-5AC isoform X1	1	C:GO:0005615	C:extracellular space						NP_610188.2 uncharacterized protein Dmel_CG43366 [Drosophila melanogaster]		0	6	789	2	8	4	0	103	106	68	237	65	273	0		0	2.41149	34.8589	1.09238	3.47682	0.718365	0	22.4588	26.1541	13.7423	63.2343	17.6828	41.3785	0
SBULL_13666.mrna1	40	---NA---											0	0	0	0	0	0	0	2	1	2	5	3	7	0		0	0	0	0	0	0	0	34.0154	19.2455	31.5265	104.057	63.6582	82.7571	0
SBULL_13667.mrna1	75	probable phospholipid-transporting ATPase VD isoform X1	5	F:GO:0000287; F:GO:0004012; F:GO:0005524; C:GO:0016021; P:GO:0045332	F:magnesium ion binding; F:phospholipid-translocating ATPase activity; F:ATP binding; C:integral component of membrane; P:phospholipid translocation	EC:3.6.1.3; EC:3.6.3.1; EC:3.6.1.15	Adenosinetriphosphatase; Phospholipid-translocating ATPase; Nucleoside-triphosphate phosphatase				NP_995665.1 uncharacterized protein Dmel_CG33298, isoform A [Drosophila melanogaster]		0	4	23	0	0	1	1	11	7	3	6	5	6	1		0	17.318	6.75857	0	0	3.1787	3.4243	20.816	14.4953	7.42035	13.7153	13.9843	6.67831	0
SBULL_13668.mrna1	94	spermine oxidase	2	F:GO:0016491; P:GO:0055114	F:oxidoreductase activity; P:oxidation-reduction process						NP_649811.1 uncharacterized protein Dmel_CG8032, isoform A [Drosophila melanogaster]		6	10	90	8	20	0	6	29	33	50	10	24	29	2		5.39525	13.7615	16.0265	15.6557	37.7393	0	7.49376	23.0926	29.7354	36.9016	9.74382	23.8437	16.0522	3.43724
SBULL_1367.mrna1	406	TNF receptor-associated factor family protein DDB_G0272098 isoform X1									NP_727970.1 uncharacterized protein Dmel_CG9992, isoform E [Drosophila melanogaster]		420	112	1519	80	282	191	247	679	439	711	1011	758	1313	92		35.283	14.0034	26.8863	13.5439	51.3145	21.4797	26.9192	44.8128	32.7855	43.4913	81.6465	62.415	60.2364	19.1932
SBULL_13671.mrna1	450	ubiquitin carboxyl-terminal hydrolase calypso	10	C:GO:0000790; F:GO:0003682; F:GO:0004843; F:GO:0005515; C:GO:0005737; P:GO:0006342; P:GO:0006511; P:GO:0007385; C:GO:0035517; P:GO:0035522	C:nuclear chromatin; F:chromatin binding; F:thiol-dependent ubiquitin-specific protease activity; F:protein binding; C:cytoplasm; P:chromatin silencing; P:ubiquitin-dependent protein catabolic process; P:specification of segmental identity, abdomen; C:PR-DUB complex; P:monoubiquitinated histone H2A deubiquitination	EC:3.4.19.12	Ubiquitinyl hydrolase 1				NP_788374.1 calypso, isoform B [Drosophila melanogaster]		182	151	788	47	100	84	146	139	141	149	214	179	282	45		13.5561	16.8865	12.4516	7.04893	16.375	8.37277	14.0006	8.11697	9.31715	8.0643	15.2914	13.0413	11.447	8.16496
SBULL_13678.mrna1	67	PREDICTED: uncharacterized protein LOC108101254, partial	2	C:GO:0005634; P:GO:0006915	C:nucleus; P:apoptotic process						NP_726513.1 uncharacterized protein Dmel_CG30428, isoform A [Drosophila melanogaster]		3	440	321	2	15	0	3	14	6	17	9	11	17	0		14.9224	3295.22	91.091	28.3858	70.6026	0	29.6355	32.394	15.7099	36.4575	25.482	31.7554	27.3431	0
SBULL_13680.mrna1	103	transcription factor Adf-1-like	4	F:GO:0003677; C:GO:0005634; P:GO:0006351; P:GO:0006355	F:DNA binding; C:nucleus; P:transcription, DNA-templated; P:regulation of transcription, DNA-templated						NP_730439.2 uncharacterized protein Dmel_CG8765, isoform B [Drosophila melanogaster]		10	4	32	4	2	2	0	18	16	28	6	8	17	0		1.40525	2.14065	2.4758	1.50038	1.49051	0	0	11.1661	11.2314	16.0986	4.55444	6.19165	7.33061	0
SBULL_13682.mrna1	42	---NA---											0	0	0	0	0	0	0	1	5	3	2	1	0	1		0	0	0	0	0	0	0	13.9028	78.6606	38.6567	34.0241	17.3456	0	31.7948
SBULL_13683.mrna1	79	PREDICTED: uncharacterized protein LOC108362429	1	C:GO:0016020	C:membrane								11	0	0	0	0	0	0	6	5	3	0	3	0	0		16.8238	0	0	0	0	0	0	41.8728	16.8131	18.7785	0	6.7409	8.45035	0
SBULL_13684.mrna1	173	uncharacterized protein LOC111683217	2	C:GO:0005634; P:GO:0006355	C:nucleus; P:regulation of transcription, DNA-templated						NP_001097352.1 muscle wasted, isoform C [Drosophila melanogaster]		7	10	60	3	5	3	5	10	11	7	7	15	18	2		1.82088	2.7455	3.0066	1.59831	2.2631	1.05145	1.3694	2.33758	2.64515	2.75742	2.34029	4.2421	3.10209	1.21955
SBULL_13687.mrna1	85	ubiquitin-fold modifier 1	5	C:GO:0005634; C:GO:0005737; P:GO:0034976; P:GO:0050905; P:GO:1990592	C:nucleus; C:cytoplasm; P:response to endoplasmic reticulum stress; P:neuromuscular process; P:protein K69-linked ufmylation						NP_001286507.1 Ubiquitin-fold modifier 1, isoform B [Drosophila melanogaster]		146	92	903	65	161	183	47	280	284	363	277	268	512	54		174.715	173.368	172.897	168.696	367.566	307.145	78.6428	300.32	344.69	360.855	363.547	358.631	381.731	115.705
SBULL_13689.mrna1	135	transposase	1	P:GO:0006259	P:DNA metabolic process								4	2	22	6	4	2	2	12	20	33	33	14	28	2		1.1751	0.592386	1.52185	3.24854	3.38226	0.530329	0.521142	3.95697	7.4627	10.0855	13.3153	5.75966	6.41803	1.7609
SBULL_1369.mrna1	143	amyloid beta A4 precursor protein-binding family B member 1-interacting protein isoform X11	1	C:GO:0016020	C:membrane						NP_001163159.1 uncharacterized protein Dmel_CG12963, isoform E [Drosophila melanogaster]		530	26	46	138	149	107	13	56	37	36	16	16	33	44		127.556	11.3066	2.62302	61.8491	57.0317	39.9869	4.72656	16.6628	12.458	9.92805	5.82553	5.93975	6.82554	34.0185
SBULL_13691.mrna1	64	---NA---											0	0	27	0	0	0	0	20	12	20	18	22	33	1		0	0	10.8118	0	0	0	0	55.3809	37.6007	51.3287	60.9898	76.0047	63.5193	4.60138
SBULL_13694.mrna1	784	cap-specific mRNA (nucleoside-2'-O-)-methyltransferase 1	5	F:GO:0003676; F:GO:0004483; C:GO:0005634; P:GO:0006370; P:GO:0097309	F:nucleic acid binding; F:mRNA (nucleoside-2'-O-)-methyltransferase activity; C:nucleus; P:7-methylguanosine mRNA capping; P:cap1 mRNA methylation	EC:2.1.1.57	Methyltransferase cap1				NP_572148.2 uncharacterized protein Dmel_CG6379, isoform A [Drosophila melanogaster]		166	130	2180	118	227	126	156	769	691	675	832	922	1246	224		6.52556	7.56762	18.7475	9.40198	19.2254	6.58135	7.91822	23.9571	24.3597	19.4901	31.7166	35.8366	26.9829	22.6047
SBULL_13700.mrna1	404	dmX-like protein 2	5	P:GO:0007035; P:GO:0008593; P:GO:0035149; C:GO:0043291; P:GO:0070072	P:vacuolar acidification; P:regulation of Notch signaling pathway; P:lumen formation, open tracheal system; C:RAVE complex; P:vacuolar proton-transporting V-type ATPase complex assembly						NP_572302.2 Rabconnectin-3A [Drosophila melanogaster]		1823	724	2682	409	569	633	539	1029	853	963	929	932	1388	675		153.956	91.8724	49.2244	68.9701	105.268	71.4908	59.0885	68.3164	64.0831	59.2566	75.471	77.1993	64.0562	141.62
SBULL_13704.mrna1	240	39S ribosomal protein L16, mitochondrial	4	F:GO:0003735; C:GO:0005762; F:GO:0019843; P:GO:0032543	F:structural constituent of ribosome; C:mitochondrial large ribosomal subunit; F:rRNA binding; P:mitochondrial translation						NP_525041.1 mitochondrial ribosomal protein L16, isoform A [Drosophila melanogaster]		348	327	2625	759	1101	924	818	1060	818	1577	826	835	1550	591		36.0283	45.4122	87.4138	181.175	304.925	106.76	87.9325	137.491	120.063	189.584	131.1	135.128	139.754	232.074
SBULL_13707.mrna1	104	uncharacterized protein LOC111675749	1	C:GO:0016021	C:integral component of membrane						NP_725491.1 uncharacterized protein Dmel_CG30080, isoform A [Drosophila melanogaster]		14	0	159	0	1	0	0	26	14	112	19	19	51	0		6.41008	0	12.1731	0	0	0	0	10.1643	6.19324	40.5811	9.08893	9.26715	13.8592	0
SBULL_13709.mrna1	463	serine incorporator 1 isoform X1	3	P:GO:0006658; P:GO:0006665; C:GO:0016021	P:phosphatidylserine metabolic process; P:sphingolipid metabolic process; C:integral component of membrane						NP_648893.1 TMS1, isoform A [Drosophila melanogaster]		1003	729	2828	868	1027	1261	1528	2190	1811	2488	2361	2411	3786	348		72.0702	78.554	43.8912	125.208	161.001	121.221	142.541	123.677	115.73	130.225	163.153	169.875	148.623	62.5356
SBULL_1371.mrna1	197	potassium channel subfamily T member 1-like	2	P:GO:0006813; C:GO:0016021	P:potassium ion transport; C:integral component of membrane						NP_001246242.1 slowpoke 2, isoform H [Drosophila melanogaster]		2	184	255	9	26	10	41	13	18	17	2	1	6	0		0.427857	54.7771	10.1069	3.9266	10.7303	2.87749	11.4999	2.24846	3.52289	2.72516	0.423279	0.215789	0.721366	0
SBULL_13717.mrna1	411	aspartate aminotransferase, cytoplasmic	4	P:GO:0006520; F:GO:0008483; P:GO:0009058; F:GO:0030170	P:cellular amino acid metabolic process; F:transaminase activity; P:biosynthetic process; F:pyridoxal phosphate binding						NP_611086.1 glutamate oxaloacetate transaminase 1, isoform A [Drosophila melanogaster]		1083	1839	10238	843	1149	1180	1451	1154	919	1586	474	548	811	387		84.3774	215.12	174.771	122.806	165.578	120.598	146.834	75.0515	67.6323	95.6	37.7213	44.4654	36.6637	79.6128
SBULL_13721.mrna1	44	---NA---											10	0	3	1	0	0	0	5	2	5	5	0	4	0		0	0	0	0	0	0	0	57.5483	26.0482	53.3376	70.4185	0	32.0025	0
SBULL_13723.mrna1	1265	ras association domain-containing protein 10 isoform X2									NP_612005.1 uncharacterized protein Dmel_CG13875, isoform A [Drosophila melanogaster]		2	8	942	22	34	19	15	548	514	763	169	121	330	120		0.0480579	0.288288	4.922	1.05957	1.80139	0.609839	0.465342	10.2117	10.8384	13.1778	3.85353	2.81314	4.27458	7.30832
SBULL_1374.mrna1	251	uncharacterized protein LOC111681067											0	0	3	38	24	17	58	0	0	6	0	0	1	0		0	0	0.100663	11.4694	8.02836	3.4873	11.3663	0	0	0.677943	0	0	0.0847429	0
SBULL_1375.mrna1	212	ecdysis triggering hormone	6	F:GO:0001664; C:GO:0005615; P:GO:0007218; F:GO:0008255; P:GO:0010469; P:GO:0018990	F:G-protein coupled receptor binding; C:extracellular space; P:neuropeptide signaling pathway; F:ecdysis-triggering hormone activity; P:regulation of signaling receptor activity; P:ecdysis, chitin-based cuticle						NP_524699.1 ecdysis triggering hormone [Drosophila melanogaster]		0	2	32	1	0	0	0	19	17	29	29	15	15	13		0	0.57977	1.22296	0.391929	0	0	0	3.09874	2.9805	4.59522	5.87721	2.89957	1.83091	5.99732
SBULL_13750.mrna1	780	dual specificity protein kinase splA	4	F:GO:0005515; C:GO:0005887; P:GO:0007606; P:GO:0050808	F:protein binding; C:integral component of plasma membrane; P:sensory perception of chemical stimulus; P:synapse organization						NP_612066.1 defective proboscis extension response 20 [Drosophila melanogaster]		5	2	90	21	16	7	11	23	22	45	12	3	15	38		0.201285	0.120791	0.791787	1.61616	1.24152	0.376638	0.572465	0.720559	0.779918	1.30664	0.460021	0.11726	0.326659	3.85579
SBULL_13758.mrna1	275	protein serrate	20	F:GO:0005112; F:GO:0005509; P:GO:0007436; P:GO:0007451; P:GO:0007476; C:GO:0009986; P:GO:0014009; C:GO:0016021; C:GO:0016324; P:GO:0016330; C:GO:0030673; P:GO:0030718; P:GO:0035017; P:GO:0035170; P:GO:0035204; P:GO:0035214; P:GO:0036011; P:GO:0042689; P:GO:0045746; P:GO:0046331	F:Notch binding; F:calcium ion binding; P:larval salivary gland morphogenesis; P:dorsal/ventral lineage restriction, imaginal disc; P:imaginal disc-derived wing morphogenesis; C:cell surface; P:glial cell proliferation; C:integral component of membrane; C:apical plasma membrane; P:second mitotic wave involved in compound eye morphogenesis; C:axolemma; P:germ-line stem cell population maintenance;…						NP_524527.3 serrate, isoform A [Drosophila melanogaster]		4	5	39	3	2	4	24	49	49	54	57	41	103	9		0.406919	1.01968	1.16245	0.823935	0.594287	0.545766	4.06428	5.28089	5.97574	5.39393	7.51692	5.51293	7.71632	2.97982
SBULL_13762.mrna1	417	O-glucosyltransferase rumi	11	C:GO:0005788; P:GO:0006493; P:GO:0006664; P:GO:0007030; P:GO:0033577; F:GO:0035251; F:GO:0035252; P:GO:0042052; P:GO:0045747; P:GO:0060537; P:GO:2000035	C:endoplasmic reticulum lumen; P:protein O-linked glycosylation; P:glycolipid metabolic process; P:Golgi organization; P:protein glycosylation in endoplasmic reticulum; F:UDP-glucosyltransferase activity; F:UDP-xylosyltransferase activity; P:rhabdomere development; P:positive regulation of Notch signaling pathway; P:muscle tissue development; P:regulation of stem cell division						NP_651095.1 rumi, isoform A [Drosophila melanogaster]		59	40	493	29	51	28	28	169	186	191	390	355	484	18		4.47728	4.15623	8.43462	4.59247	8.05025	2.61517	2.63967	10.8021	13.453	11.315	30.5029	28.3099	21.5045	3.64208
SBULL_13767.mrna1	464	guanine deaminase	3	P:GO:0006147; F:GO:0008270; F:GO:0008892	P:guanine catabolic process; F:zinc ion binding; F:guanine deaminase activity	EC:3.5.4.3	Guanine deaminase				NP_649439.1 dihydropterin deaminase [Drosophila melanogaster]		113	328	882	115	260	158	142	616	657	831	909	807	1731	266		7.90801	34.9698	13.4947	16.4983	40.1507	15.1029	13.2308	34.6998	41.879	43.3858	62.6562	56.7162	67.7806	47.6842
SBULL_1377.mrna1	101	limbic system-associated membrane protein	2	C:GO:0016021; P:GO:0050808	C:integral component of membrane; P:synapse organization						NP_608946.3 Dpr-interacting protein eta, isoform B [Drosophila melanogaster]		0	0	5	1	1	0	0	0	1	6	0	0	9	1		0	0	0.456512	0	1.56352	0	0	0	0.739299	3.63318	0	0	4.08733	1.4855
SBULL_13770.mrna1	661	cysteine protease ATG4D isoform X1	9	P:GO:0000045; P:GO:0000422; F:GO:0004197; C:GO:0005829; P:GO:0006501; P:GO:0006508; P:GO:0006612; P:GO:0044804; P:GO:0051697	P:autophagosome assembly; P:autophagy of mitochondrion; F:cysteine-type endopeptidase activity; C:cytosol; P:C-terminal protein lipidation; P:proteolysis; P:protein targeting to membrane; P:autophagy of nucleus; P:protein delipidation	EC:3.4.22	Acting on peptide bonds (peptidases)				NP_650452.1 Autophagy-related 4b [Drosophila melanogaster]		116	2617	1719	56	112	95	237	241	221	268	324	359	460	54		5.49777	187.929	17.8323	5.32808	11.5742	5.99618	14.4731	9.06034	9.40167	9.33821	14.9048	16.8388	12.0212	6.54609
SBULL_13778.mrna1	875	pyruvate dehydrogenase E1 component subunit beta, mitochondrial isoform X1	6	F:GO:0004739; C:GO:0005759; P:GO:0006086; P:GO:0006096; C:GO:0045254; P:GO:0055114	F:pyruvate dehydrogenase (acetyl-transferring) activity; C:mitochondrial matrix; P:acetyl-CoA biosynthetic process from pyruvate; P:glycolytic process; C:pyruvate dehydrogenase complex; P:oxidation-reduction process	EC:1.2.4.1	Pyruvate dehydrogenase (acetyl-transferring)				NP_733265.1 uncharacterized protein Dmel_CG11876, isoform A [Drosophila melanogaster]		1781	1846	8226	4422	3900	3868	5454	2928	2119	4194	1850	1801	2625	1546		61.2947	95.9471	58.7718	298.33	239.41	176.171	242.542	80.9312	66.2767	107.442	62.5708	62.1079	50.4355	138.496
SBULL_1378.mrna1	101	ecdysone-induced protein 75B, isoforms C/D isoform X3	14	P:GO:0000122; F:GO:0003707; F:GO:0004887; C:GO:0005634; P:GO:0007553; F:GO:0008270; P:GO:0018990; P:GO:0019730; F:GO:0020037; P:GO:0030522; P:GO:0035075; P:GO:0043401; F:GO:0043565; P:GO:0048477	P:negative regulation of transcription by RNA polymerase II; F:steroid hormone receptor activity; F:thyroid hormone receptor activity; C:nucleus; P:regulation of ecdysteroid metabolic process; F:zinc ion binding; P:ecdysis, chitin-based cuticle; P:antimicrobial humoral response; F:heme binding; P:intracellular receptor signaling pathway; P:response to ecdysone; P:steroid hormone mediated signalin…						NP_730323.1 Ecdysone-induced protein 75B, isoform D [Drosophila melanogaster]		49	116	410	44	52	140	183	322	628	305	134	93	193	8		8.12361	39.4076	42.3034	28.484	17.1987	29.3741	22.2572	210.374	464.28	184.687	107.126	75.8064	87.6506	11.884
SBULL_13786.mrna1	153	trafficking protein particle complex subunit 6B	5	C:GO:0005801; C:GO:0005802; P:GO:0006888; C:GO:0030008; P:GO:0043087	C:cis-Golgi network; C:trans-Golgi network; P:ER to Golgi vesicle-mediated transport; C:TRAPP complex; P:regulation of GTPase activity						NP_650450.1 TRAPP subunit 33 [Drosophila melanogaster]		30	38	227	27	63	22	13	95	77	108	96	76	169	42		19.6669	25.3821	17.5001	15.6751	46.0741	17.1317	11.3249	42.0051	39.8082	46.4747	53.0055	53.3898	54.5652	35.0466
SBULL_13788.mrna1	221	uncharacterized protein LOC111679674									NP_001189223.1 uncharacterized protein Dmel_CG42727 [Drosophila melanogaster]		3	2	1	180	111	319	8	0	2	3	0	0	1	0		0.363331	0.546845	0.0398119	66.4909	44.0575	77.8565	1.90046	0	0.330015	0.405454	0	0	0.101363	0
SBULL_13793.mrna1	211	uridine diphosphate glucose pyrophosphatase	2	F:GO:0016818; F:GO:0046872	F:hydrolase activity, acting on acid anhydrides, in phosphorus-containing anhydrides; F:metal ion binding						NP_733202.2 uncharacterized protein Dmel_CG42813, isoform A [Drosophila melanogaster]		189	68	1172	164	359	235	122	374	292	476	244	254	471	159		32.7601	18.3857	45.8464	57.6122	136.703	54.7145	29.6874	58.3518	51.5526	68.832	46.5829	49.4429	51.0817	73.3485
SBULL_13796.mrna1	703	transmembrane and TPR repeat-containing protein CG5038	1	C:GO:0016021	C:integral component of membrane						NP_650451.1 uncharacterized protein Dmel_CG5038 [Drosophila melanogaster]		100	87	444	10	36	21	22	311	318	296	316	273	440	46		4.50919	5.88609	4.3335	0.905527	3.57489	1.26584	1.28293	10.9247	12.6405	9.63703	13.5829	11.9647	10.744	5.21947
SBULL_138.mrna1	386	uncharacterized protein LOC111684416	1	C:GO:0016021	C:integral component of membrane						NP_731058.1 osiris 10 [Drosophila melanogaster]		0	0	20	0	0	0	0	6	15	4	0	0	1	0		0	0	0.314452	0	0	0	0	0.420897	1.1907	0.260067	0	0	0.0487626	0
SBULL_1380.mrna1	148	pancreatic triacylglycerol lipase	4	C:GO:0005576; P:GO:0016042; F:GO:0016298; F:GO:0052689	C:extracellular region; P:lipid catabolic process; F:lipase activity; F:carboxylic ester hydrolase activity	EC:3.1.1.1	Carboxylesterase				NP_572286.1 uncharacterized protein Dmel_CG5966, isoform A [Drosophila melanogaster]		0	27	30	4	1	3	31	11	9	30	13	36	48	7		0	12.673	2.62055	1.38445	1.45365	1.81384	13.3338	5.30002	4.41913	10.6001	9.89867	20.8816	13.5733	8.44796
SBULL_13800.mrna1	1271	cyclin-G-associated kinase	6	F:GO:0004672; F:GO:0005524; P:GO:0006468; P:GO:0007275; P:GO:0009653; P:GO:0050794	F:protein kinase activity; F:ATP binding; P:protein phosphorylation; P:multicellular organism development; P:anatomical structure morphogenesis; P:regulation of cellular process						NP_730785.1 auxilin, isoform A [Drosophila melanogaster]		820	1472	1932	213	282	309	369	803	688	743	983	881	1271	203		19.606	52.7815	10.2078	10.1597	14.8669	9.86865	11.3905	14.8889	14.4351	12.7684	22.3025	20.3803	16.3815	12.3024
SBULL_13809.mrna1	568	zinc finger protein 26	3	F:GO:0003676; F:GO:0003677; F:GO:0046872	F:nucleic acid binding; F:DNA binding; F:metal ion binding						NP_732017.3 uncharacterized protein Dmel_CG42726 [Drosophila melanogaster]		99	75	572	15	13	20	24	246	217	205	317	300	432	11		5.65478	6.42939	6.99866	1.72246	1.63411	1.52778	1.70065	10.9748	10.9549	8.4765	17.3052	16.6982	13.397	1.57458
SBULL_13815.mrna1	1106	yemanuclein-alpha	6	C:GO:0000776; C:GO:0001940; F:GO:0003677; P:GO:0007143; P:GO:0035042; C:GO:0042585	C:kinetochore; C:male pronucleus; F:DNA binding; P:female meiotic nuclear division; P:fertilization, exchange of chromosomal proteins; C:germinal vesicle						NP_001263054.1 yemanuclein, isoform B [Drosophila melanogaster]		1655	468	4763	153	308	169	176	624	547	524	415	522	701	109		43.581	18.7702	28.6637	7.71658	18.4943	5.9183	6.11452	13.4091	13.3011	10.4364	10.9124	13.9951	10.4712	7.63968
SBULL_13826.mrna1	131	---NA---											1	1	0	1966	0	6164	0	0	0	0	0	0	0	0		0.418134	0	0	473.657	0	574.609	0	0	0	0	0	0	0	0
SBULL_13832.mrna1	366	---NA---											0	0	21	2	0	4	0	0	0	0	0	0	1	0		0	0	0.418767	0.383516	0	0.509203	0	0	0	0	0	0	0.0520357	0
SBULL_13841.mrna1	186	transient receptor potential cation channel trpm isoform X9	4	F:GO:0005216; C:GO:0016021; P:GO:0034220; P:GO:0051262	F:ion channel activity; C:integral component of membrane; P:ion transmembrane transport; P:protein tetramerization						NP_001286447.1 transient receptor potential cation channel, subfamily M, isoform I [Drosophila melanogaster]		111	35	157	18	33	20	49	106	100	76	60	57	79	26		25.3844	12.2823	7.73333	8.08826	16.7416	5.95583	14.9849	20.0433	21.3967	13.3192	13.8825	13.447	10.3837	14.3187
SBULL_13844.mrna1	196	transient receptor potential cation channel trpm isoform X9	4	F:GO:0005216; C:GO:0016021; P:GO:0034220; P:GO:0051262	F:ion channel activity; C:integral component of membrane; P:ion transmembrane transport; P:protein tetramerization						NP_001286447.1 transient receptor potential cation channel, subfamily M, isoform I [Drosophila melanogaster]		31	17	99	7	4	3	12	66	74	44	30	43	49	15		6.68122	5.51875	4.33644	3.07725	1.87988	0.869734	3.39136	12.5503	15.1879	7.59314	7.03868	9.7864	6.30069	7.68793
SBULL_13846.mrna1	122	39S ribosomal protein L52, mitochondrial	3	F:GO:0003735; C:GO:0005762; P:GO:0032543	F:structural constituent of ribosome; C:mitochondrial large ribosomal subunit; P:mitochondrial translation						NP_610313.1 mitochondrial ribosomal protein L52 [Drosophila melanogaster]		10	6	263	19	90	24	10	18	19	53	48	19	42	98		4.80699	3.64241	22.3076	17.0857	86.7279	15.0186	5.79885	23.9125	27.0588	50.0574	40.359	19.5464	23.7868	102.923
SBULL_13848.mrna1	295	DNA replication licensing factor Mcm7	8	F:GO:0003677; F:GO:0005524; C:GO:0005634; P:GO:0006270; P:GO:0007049; P:GO:0032508; C:GO:0042555; F:GO:0043138	F:DNA binding; F:ATP binding; C:nucleus; P:DNA replication initiation; P:cell cycle; P:DNA duplex unwinding; C:MCM complex; F:3'-5' DNA helicase activity	EC:3.6.1.15	Nucleoside-triphosphate phosphatase				NP_523984.1 minichromosome maintenance 7 [Drosophila melanogaster]		32	888	208	4	63	3	22	21	10	23	50	50	47	18		9.6723	311.087	27.1045	3.00981	23.3779	3.15865	6.61724	7.66553	6.67243	9.83722	31.5068	32.7376	17.83	22.7894
SBULL_1385.mrna1	333	carbonic anhydrase-related protein 10	2	F:GO:0004089; F:GO:0008270	F:carbonate dehydratase activity; F:zinc ion binding	EC:4.2.1.1	Carbonic anhydrase				NP_572581.1 uncharacterized protein Dmel_CG32698, isoform A [Drosophila melanogaster]		0	2	9	2	0	2	9	6	2	0	0	0	0	2		0	0.32041	0.211236	0.430648	0	0.28571	1.24723	0.505089	0.190516	0	0	0	0	0.52558
SBULL_13851.mrna1	771	protein Teyrha-meyrha isoform X1									NP_001137981.1 teyrha-meyrha, isoform B [Drosophila melanogaster]		0	6	162	10	1	9	10	20	26	18	35	33	33	17		0	0.366975	1.43245	0.818374	0.0898029	0.435914	0.527049	0.634595	0.933522	0.529346	1.35891	1.30638	0.727851	1.74654
SBULL_13861.mrna1	131	hypothetical protein FF38_12073											2	4	9	0	0	0	5	1	9	10	15	8	12	3		0.836268	2.53101	0.720198	0	0	0	2.78769	0.354055	3.60577	3.28149	6.49855	3.53385	2.95334	2.79594
SBULL_13864.mrna1	90	hypothetical protein FF38_12082											87	1096	149	20	62	57	76	11	30	34	58	30	67	9		56.475	1057.68	23.0776	33.941	81.3152	65.492	57.6846	38.832	53.1386	60.2636	86.1928	54.0818	75.9573	24.514
SBULL_13870.mrna1	424	origin recognition complex subunit 4	4	C:GO:0000808; F:GO:0003677; C:GO:0005634; P:GO:0006260	C:origin recognition complex; F:DNA binding; C:nucleus; P:DNA replication						NP_477320.1 origin recognition complex subunit 4 [Drosophila melanogaster]		13	99	265	1	5	2	17	81	44	102	86	91	137	25		1.03781	12.1074	4.6466	0.160823	0.877263	0.213706	1.76006	5.38883	3.33257	6.09798	6.9007	8.05232	6.22865	4.96329
SBULL_13874.mrna1	2080	rapamycin-insensitive companion of mTOR	5	P:GO:0016043; P:GO:0031929; C:GO:0031932; P:GO:0048522; P:GO:0065008	P:cellular component organization; P:TOR signaling; C:TORC2 complex; P:positive regulation of cellular process; P:regulation of biological quality						NP_001285433.1 rapamycin-insensitive companion of Tor, isoform C [Drosophila melanogaster]		1545	1731	5233	134	169	133	238	893	864	643	697	662	998	322		22.1324	37.1579	16.4334	3.84412	5.34105	2.54404	4.39828	9.89987	10.8387	6.60678	9.45508	9.15638	7.69078	11.7303
SBULL_1388.mrna1	315	putative fatty acyl-CoA reductase CG5065 isoform X3	5	P:GO:0006629; C:GO:0016021; P:GO:0055114; F:GO:0080019; F:GO:0102965	P:lipid metabolic process; C:integral component of membrane; P:oxidation-reduction process; F:fatty-acyl-CoA reductase (alcohol-forming) activity; F:alcohol-forming fatty acyl-CoA reductase activity	EC:1.2.1.84	Alcohol-forming fatty acyl-CoA reductase				NP_726500.1 uncharacterized protein Dmel_CG30427, isoform D [Drosophila melanogaster]		33	53	31	59	98	180	237	4061	1957	4068	56	30	109	2		3.76882	9.0962	0.804105	13.6169	24.5491	27.55	35.2008	392.699	214.316	361.036	6.40993	3.49317	7.15711	0.56153
SBULL_13892.mrna1	433	POU domain protein CF1A	10	F:GO:0000980; F:GO:0001077; P:GO:0002807; C:GO:0005634; P:GO:0007422; P:GO:0007425; P:GO:0008045; P:GO:0035284; P:GO:0045944; P:GO:0048814	F:RNA polymerase II distal enhancer sequence-specific DNA binding; F:transcriptional activator activity, RNA polymerase II proximal promoter sequence-specific DNA binding; P:positive regulation of antimicrobial peptide biosynthetic process; C:nucleus; P:peripheral nervous system development; P:epithelial cell fate determination, open tracheal system; P:motor neuron axon guidance; P:brain segmenta…						NP_001163355.2 ventral veins lacking, isoform C [Drosophila melanogaster]		159	296	2568	280	122	661	1020	144	300	249	289	179	297	220		11.9959	32.6326	42.5104	42.5187	19.3475	63.3867	97.2691	8.80064	20.7471	14.1043	21.6125	13.6487	12.6174	42.6457
SBULL_13897.mrna1	710	radial spoke head protein 3 homolog A	3	C:GO:0005875; P:GO:0007017; F:GO:0008017	C:microtubule associated complex; P:microtubule-based process; F:microtubule binding						NP_648059.1 uncharacterized protein Dmel_CG32392, isoform B [Drosophila melanogaster]		7671	5	43	348	3	13	25	1344	665	473	47	54	304	28		341.986	0.334624	0.4139	31.081	0.294698	0.775137	1.44208	46.6969	26.1454	15.2318	1.99821	2.34083	7.34218	3.14328
SBULL_13906.mrna1	118	radial spoke head protein 3 homolog B isoform X2	3	C:GO:0005875; P:GO:0007017; F:GO:0008017	C:microtubule associated complex; P:microtubule-based process; F:microtubule binding						NP_729190.1 uncharacterized protein Dmel_CG32392, isoform A [Drosophila melanogaster]		1069	0	1	132	0	2	1	202	138	64	0	0	47	0		549.444	0	0.10967	142.577	0	1.40078	0.692199	89.7762	69.4023	26.3628	0	0	14.5201	0
SBULL_13908.mrna1	192	intraflagellar transport protein 172 homolog	4	C:GO:0031514; P:GO:0042073; C:GO:0097730; P:GO:1905515	C:motile cilium; P:intraciliary transport; C:non-motile cilium; P:non-motile cilium assembly						NP_647700.2 outer segment 2 [Drosophila melanogaster]		0	0	0	1	0	0	0	4	3	0	0	0	3	0		0	0	0	0.452213	0	0	0	0.897262	0.812258	0	0	0.447782	0.498967	0
SBULL_1391.mrna1	180	LIM and senescent cell antigen-like-containing domain protein 1 isoform X2	8	C:GO:0005925; P:GO:0007391; P:GO:0007475; P:GO:0008258; P:GO:0009880; C:GO:0031252; P:GO:0046329; F:GO:0046872	C:focal adhesion; P:dorsal closure; P:apposition of dorsal and ventral imaginal disc-derived wing surfaces; P:head involution; P:embryonic pattern specification; C:cell leading edge; P:negative regulation of JNK cascade; F:metal ion binding						NP_731242.1 steamer duck, isoform C [Drosophila melanogaster]		103	131	751	211	154	294	435	261	278	429	207	266	396	154		23.003	46.1055	37.2343	101.599	81.5066	89.9612	132.523	51.9966	62.6706	79.2123	50.4614	66.1155	54.8393	88.2032
SBULL_13912.mrna1	442	arrestin domain-containing protein 5									NP_652647.2 uncharacterized protein Dmel_CG18744 [Drosophila melanogaster]		2	5	18	13	9	22	11	5	6	13	7	24	27	8		0.152103	0.570944	0.318651	1.99102	1.50463	2.23914	1.0846	0.298224	0.404956	0.829209	0.510887	1.78596	1.3682	1.51498
SBULL_13919.mrna1	375	arrestin domain-containing protein 5									NP_649739.1 uncharacterized protein Dmel_CG18268 [Drosophila melanogaster]		765	116	132	226	163	118	37	382	684	241	155	56	221	13		70.166	15.9473	2.48146	40.2193	32.8471	14.5883	4.43462	27.7574	56.2414	16.2306	13.7817	5.07681	11.1627	2.97226
SBULL_13924.mrna1	505	arrestin domain-containing protein 3									NP_649738.1 uncharacterized protein Dmel_CG3014, isoform A [Drosophila melanogaster]		1	0	16	2	1	0	5	2	5	0	8	1	5	2		0.0652395	0	0.21594	0.262505	0.143504	0	0.422543	0.102091	0.288809	0	0.499689	0.0636859	0.177414	0.32609
SBULL_13928.mrna1	478	arrestin domain-containing protein 17									NP_001262347.1 uncharacterized protein Dmel_CG2993, isoform B [Drosophila melanogaster]		43	0	75	10	15	13	14	53	30	50	24	15	33	25		2.98731	0	1.14947	1.39822	2.29165	1.20838	1.26031	2.88358	1.84698	2.52131	1.5978	1.0182	1.24805	4.33437
SBULL_13939.mrna1	138	diacylglycerol kinase eta isoform X3	8	F:GO:0003951; F:GO:0004143; F:GO:0005524; C:GO:0005622; P:GO:0007205; P:GO:0016310; P:GO:0035556; F:GO:0046872	F:NAD+ kinase activity; F:diacylglycerol kinase activity; F:ATP binding; C:intracellular; P:protein kinase C-activating G-protein coupled receptor signaling pathway; P:phosphorylation; P:intracellular signal transduction; F:metal ion binding	EC:2.7.1.23; EC:2.7.1.107	NAD(+) kinase; Diacylglycerol kinase (ATP)				NP_001246970.1 uncharacterized protein Dmel_CG34384, isoform D [Drosophila melanogaster]		0	0	8	0	1	0	0	1	0	0	0	1	1	1		0	0	0.492277	0	0.820213	0	0	0.318782	0	0	0	0.397724	0.221593	0.856741
SBULL_1394.mrna2	167	lipid storage droplets surface-binding protein 1									NP_651183.3 lipid storage droplet-1, isoform C [Drosophila melanogaster]		0	0	1	2	0	0	0	0	0	0	0	0	0	1		21.1727	109.491	14.7368	19.7382	65.7306	59.3097	90.9441	221.109	200.213	294.967	336.474	637.776	561.523	19.2455
SBULL_13941.mrna1	243	pyridoxine-5'-phosphate oxidase isoform X2	5	F:GO:0004733; P:GO:0008615; F:GO:0010181; P:GO:0042823; P:GO:0055114	F:pyridoxamine-phosphate oxidase activity; P:pyridoxine biosynthetic process; F:FMN binding; P:pyridoxal phosphate biosynthetic process; P:oxidation-reduction process	EC:1.4.3.5	Pyridoxal 5'-phosphate synthase				NP_731186.2 sugarlethal, isoform A [Drosophila melanogaster]		42	55	615	61	177	75	53	369	323	465	115	96	211	128		1.59017	5.74104	18.948	7.74405	36.5278	5.76337	2.28313	46.8633	46.4188	54.7344	17.8714	15.2113	18.6274	49.3023
SBULL_13944.mrna1	389	arrestin domain-containing protein 3-like									NP_649737.1 uncharacterized protein Dmel_CG2641 [Drosophila melanogaster]		125	204	404	161	105	418	239	320	285	456	426	448	639	45		10.9582	26.6779	7.41957	27.4379	18.248	48.8669	26.8372	22.238	22.4118	29.3705	36.2252	38.8429	30.8681	9.86136
SBULL_13952.mrna1	388	arrestin domain-containing protein 3-like									NP_649737.1 uncharacterized protein Dmel_CG2641 [Drosophila melanogaster]		212	255	209	401	385	767	798	225	173	380	93	147	278	6		18.3492	32.0852	3.94574	65.411	72.4357	87.8275	89.6185	15.685	13.6468	24.5519	7.93303	12.7852	13.4713	1.31876
SBULL_13960.mrna1	653	long-chain-fatty-acid--CoA ligase bubblegum-like	4	F:GO:0003824; P:GO:0008152; P:GO:0009987; P:GO:0065007	F:catalytic activity; P:metabolic process; P:cellular process; P:biological regulation						NP_609696.1 heimdall [Drosophila melanogaster]		1992	1423	2928	115	1	2	5	6404	7885	8307	7613	11117	20942	56		93.3613	97.9691	31.1969	10.9053	0.107678	0.130771	0.316336	244.187	340.218	293.573	355.207	528.867	555.075	6.88264
SBULL_13964.mrna1	84	---NA---											48	0	2	2	0	0	0	25	7	13	2	10	14	0		40.4273	0	0	5.90981	0	0	0	27.8116	8.81187	13.4038	2.72251	13.8795	10.8262	0
SBULL_13967.mrna1	472	transcription factor AP-2-epsilon isoform X1	13	P:GO:0000122; F:GO:0000977; F:GO:0000981; P:GO:0002121; C:GO:0005634; P:GO:0007485; P:GO:0008049; P:GO:0008343; P:GO:0008344; P:GO:0016348; P:GO:0042127; P:GO:0045944; P:GO:0048728	P:negative regulation of transcription by RNA polymerase II; F:RNA polymerase II regulatory region sequence-specific DNA binding; F:RNA polymerase II transcription factor activity, sequence-specific DNA binding; P:inter-male aggressive behavior; C:nucleus; P:imaginal disc-derived male genitalia development; P:male courtship behavior; P:adult feeding behavior; P:adult locomotory behavior; P:imagin…						NP_001262178.1 transcription factor AP-2, isoform D [Drosophila melanogaster]		3	2	20	9	4	6	4	52	89	66	147	133	171	41		0.211466	0.211646	0.31099	1.27693	0.620011	0.565892	0.365388	2.87119	5.56075	3.37756	9.93186	9.16217	6.56322	7.20988
SBULL_13975.mrna1	496	activin receptor type-1 isoform X1	5	F:GO:0004675; F:GO:0005524; P:GO:0006468; P:GO:0007178; C:GO:0016021	F:transmembrane receptor protein serine/threonine kinase activity; F:ATP binding; P:protein phosphorylation; P:transmembrane receptor protein serine/threonine kinase signaling pathway; C:integral component of membrane	EC:2.7.11	Transferring phosphorus-containing groups				NP_523652.2 saxophone, isoform A [Drosophila melanogaster]		96	238	938	69	104	52	150	317	316	393	491	420	585	113		6.39283	23.7914	13.6794	8.97733	15.2326	4.63262	12.9405	16.5216	18.6366	18.984	31.3134	27.3106	21.194	18.7974
SBULL_1398.mrna1	177	uncharacterized protein LOC111675354	4	C:GO:0005576; P:GO:0006030; F:GO:0008061; C:GO:0016021	C:extracellular region; P:chitin metabolic process; F:chitin binding; C:integral component of membrane						NP_726121.3 uncharacterized protein Dmel_CG13492 [Drosophila melanogaster]		3	53	123	379	645	249	24	0	0	0	0	0	0	509		0	11.7338	5.47901	148.498	308.717	64.595	6.274	0	0	0	0	0	0	300.464
SBULL_13980.mrna2	333	Golgi to ER traffic protein 4 homolog									NP_649464.1 uncharacterized protein Dmel_CG9853, isoform A [Drosophila melanogaster]		0	0	1	0	1	0	0	0	0	0	0	0	0	0		4.90474	4.48574	17.5795	5.81374	17.548	6.71418	3.60311	15.6578	16.7654	15.9165	15.8632	16.6994	16.3261	21.8116
SBULL_13984.mrna1	61	antichymotrypsin-2-like isoform X8	1	C:GO:0005615	C:extracellular space						NP_995755.1 serpin 42Da, isoform J [Drosophila melanogaster]		118	174	665	63	235	155	49	256	341	386	541	752	1013	34		227.303	546.219	296.04	759.854	305.06	383.619	815.192	842.831	1270.4	1177.85	2179.48	3088.92	2318.31	183.231
SBULL_13987.mrna1	322	mitochondrial import receptor subunit TOM40 homolog 1	4	C:GO:0005741; F:GO:0008320; P:GO:0030150; P:GO:0071456	C:mitochondrial outer membrane; F:protein transmembrane transporter activity; P:protein import into mitochondrial matrix; P:cellular response to hypoxia						NP_996363.1 translocase of outer membrane 40, isoform B [Drosophila melanogaster]		21	7	749	7	5	3	1	114	123	152	107	70	118	290		80.2383	39.0772	71.5599	39.7402	57.5377	15.0409	9.68108	78.4302	73.3454	80.8318	59.4308	47.0086	44.5674	306.309
SBULL_1399.mrna1	120	uncharacterized protein LOC111675354	4	C:GO:0005576; P:GO:0006030; F:GO:0008061; C:GO:0016021	C:extracellular region; P:chitin metabolic process; F:chitin binding; C:integral component of membrane						NP_726121.3 uncharacterized protein Dmel_CG13492 [Drosophila melanogaster]		0	10	36	90	137	66	5	1	0	0	0	0	0	124		0	5.27679	2.54707	52.0616	130.173	38.5238	3.337	0.42779	0	0	0	0	0	133.997
SBULL_13991.mrna1	103	selenoprotein BthD									NP_609854.1 uncharacterized protein Dmel_CG15147 [Drosophila melanogaster]		103	25	98	11	67	12	4	64	44	39	127	138	136	5		39.3471	18.1955	8.15557	16.5041	71.5447	4.81195	1.91919	40.9423	30.8863	22.998	98.6795	106.806	59.5073	7.14827
SBULL_13994.mrna1	342	Protein timeless									NP_001137780.2 timeless, isoform R [Drosophila melanogaster]		587	433	505	673	555	527	1328	97	101	163	10	15	25	3		53.354	60.4679	10.27	130.838	117.102	61.7969	157.96	7.89736	9.305	12.2998	0.996241	1.52366	1.41486	0.763916
SBULL_13997.mrna1	371	Protein timeless									NP_001137781.2 timeless, isoform O [Drosophila melanogaster]		259	242	327	440	421	260	415	39	70	68	11	7	18	3		45.9175	57.3119	7.9522	129.966	124.659	81.1522	118.018	4.41736	6.91472	7.233	0.990967	0.734835	1.12589	0.694502
SBULL_14002.mrna1	118	DNA repair protein complementing XP-A cells homolog	3	F:GO:0003684; C:GO:0005634; P:GO:0006289	F:damaged DNA binding; C:nucleus; P:nucleotide-excision repair						NP_476866.1 xeroderma pigmentosum group A-like [Drosophila melanogaster]		47	29	1129	10	55	20	27	95	100	122	158	128	216	14		7.72415	3.90499	96.5095	3.24038	24.2857	4.20235	4.84539	42.2215	50.2915	50.254	85.9254	70.9754	66.7307	15.579
SBULL_14006.mrna1	146	F-actin-capping protein subunit alpha	15	P:GO:0000902; F:GO:0003779; C:GO:0005869; C:GO:0005912; P:GO:0007018; P:GO:0007294; C:GO:0008290; P:GO:0010591; C:GO:0016324; P:GO:0035220; P:GO:0046329; F:GO:0046982; P:GO:0051016; P:GO:0051490; C:GO:0071203	P:cell morphogenesis; F:actin binding; C:dynactin complex; C:adherens junction; P:microtubule-based movement; P:germarium-derived oocyte fate determination; C:F-actin capping protein complex; P:regulation of lamellipodium assembly; C:apical plasma membrane; P:wing disc development; P:negative regulation of JNK cascade; F:protein heterodimerization activity; P:barbed-end actin filament capping; P:…						NP_611539.1 capping protein alpha [Drosophila melanogaster]		141	1231	894	113	92	203	145	348	383	511	537	504	748	23		44.6677	620.281	60.3996	75.8851	65.4509	90.5532	63.2903	99.5644	123.996	135.502	187.998	179.905	148.761	18.0379
SBULL_14007.mrna1	105	39S ribosomal protein L54, mitochondrial	1	C:GO:0005840	C:ribosome						NP_611541.1 mitochondrial ribosomal protein L54 [Drosophila melanogaster]		23	0	256	7	37	11	5	35	9	49	15	25	39	26		14.7415	0	36.8567	9.98475	51.2647	12.8335	4.56298	51.9324	30.7184	61.2597	31.7733	44.1768	40.6119	42.7091
SBULL_14010.mrna1	202	F-actin-capping protein subunit alpha	15	P:GO:0000902; F:GO:0003779; C:GO:0005869; C:GO:0005912; P:GO:0007018; P:GO:0007294; C:GO:0008290; P:GO:0010591; C:GO:0016324; P:GO:0035220; P:GO:0046329; F:GO:0046982; P:GO:0051016; P:GO:0051490; C:GO:0071203	P:cell morphogenesis; F:actin binding; C:dynactin complex; C:adherens junction; P:microtubule-based movement; P:germarium-derived oocyte fate determination; C:F-actin capping protein complex; P:regulation of lamellipodium assembly; C:apical plasma membrane; P:wing disc development; P:negative regulation of JNK cascade; F:protein heterodimerization activity; P:barbed-end actin filament capping; P:…						NP_611539.1 capping protein alpha [Drosophila melanogaster]		78	674	1094	46	214	136	95	430	407	615	649	626	947	52		12.3777	169.003	42.4792	15.1354	55.8108	26.0761	17.8404	71.5963	76.6834	94.9069	132.227	130.042	109.606	25.5867
SBULL_14016.mrna1	99	disheveled-associated activator of morphogenesis 1	16	F:GO:0003779; C:GO:0005865; P:GO:0007411; P:GO:0016319; C:GO:0016528; F:GO:0017048; C:GO:0030018; P:GO:0030838; P:GO:0035152; C:GO:0044295; P:GO:0048675; P:GO:0050770; P:GO:0051017; P:GO:0051491; P:GO:0060298; P:GO:0071689	F:actin binding; C:striated muscle thin filament; P:axon guidance; P:mushroom body development; C:sarcoplasm; F:Rho GTPase binding; C:Z disc; P:positive regulation of actin filament polymerization; P:regulation of tube architecture, open tracheal system; C:axonal growth cone; P:axon extension; P:regulation of axonogenesis; P:actin filament bundle assembly; P:positive regulation of filopodium asse…						NP_569900.3 dishevelled associated activator of morphogenesis, isoform A [Drosophila melanogaster]		18	0	71	0	20	19	0	26	8	26	42	60	75	1		14.0086	0	6.05258	0	31.2368	17.1041	0	17.9262	6.24153	16.6146	35.434	51.6125	35.9451	1.54568
SBULL_14018.mrna1	87	disheveled-associated activator of morphogenesis 1	17	F:GO:0003779; C:GO:0005829; C:GO:0005865; P:GO:0007411; P:GO:0016319; C:GO:0016528; F:GO:0017048; C:GO:0030018; P:GO:0030838; P:GO:0035152; C:GO:0044295; P:GO:0048675; P:GO:0050770; P:GO:0051017; P:GO:0051491; P:GO:0060298; P:GO:0071689	F:actin binding; C:cytosol; C:striated muscle thin filament; P:axon guidance; P:mushroom body development; C:sarcoplasm; F:Rho GTPase binding; C:Z disc; P:positive regulation of actin filament polymerization; P:regulation of tube architecture, open tracheal system; C:axonal growth cone; P:axon extension; P:regulation of axonogenesis; P:actin filament bundle assembly; P:positive regulation of filo…						NP_726724.1 dishevelled associated activator of morphogenesis, isoform B [Drosophila melanogaster]		10	0	42	2	14	3	0	11	15	27	42	30	52	0		10.3411	0	7.67124	2.56296	26.1687	3.20126	0	10.991	16.9599	25.0041	51.3511	37.3986	36.117	0
SBULL_14019.mrna1	84	disheveled-associated activator of morphogenesis 1 isoform X2	17	F:GO:0003779; C:GO:0005829; C:GO:0005865; P:GO:0007411; P:GO:0016319; C:GO:0016528; F:GO:0017048; C:GO:0030018; P:GO:0030838; P:GO:0035152; C:GO:0044295; P:GO:0048675; P:GO:0050770; P:GO:0051017; P:GO:0051491; P:GO:0060298; P:GO:0071689	F:actin binding; C:cytosol; C:striated muscle thin filament; P:axon guidance; P:mushroom body development; C:sarcoplasm; F:Rho GTPase binding; C:Z disc; P:positive regulation of actin filament polymerization; P:regulation of tube architecture, open tracheal system; C:axonal growth cone; P:axon extension; P:regulation of axonogenesis; P:actin filament bundle assembly; P:positive regulation of filo…						NP_001188522.1 dishevelled associated activator of morphogenesis, isoform D [Drosophila melanogaster]		19	0	54	0	45	12	0	11	10	18	36	25	58	0		20.8657	0	8.43645	0	99.0904	18.2763	0	12.2371	12.5884	18.5592	49.0052	34.6987	44.8513	0
SBULL_1402.mrna1	180	trypsin-1	8	F:GO:0002161; F:GO:0004252; F:GO:0004823; F:GO:0005524; C:GO:0005737; P:GO:0006429; P:GO:0006508; P:GO:0106074	F:aminoacyl-tRNA editing activity; F:serine-type endopeptidase activity; F:leucine-tRNA ligase activity; F:ATP binding; C:cytoplasm; P:leucyl-tRNA aminoacylation; P:proteolysis; P:aminoacyl-tRNA metabolism involved in translational fidelity	EC:3.4.21; EC:6.1.1.4; EC:3.1.1.1	Acting on peptide bonds (peptidases); Leucine--tRNA ligase; Carboxylesterase				NP_722915.1 uncharacterized protein Dmel_CG31954 [Drosophila melanogaster]		0	0	249	0	1	0	0	2	3	217	0	0	2	0		0	0	12.3936	0	0.532723	0	0	0.996103	1.12717	53.1775	0	0	0.276966	0
SBULL_14020.mrna1	61	---NA---											0	0	60	0	4	0	0	15	12	21	31	21	59	0		0	0	7.36417	0	30.506	0	0	49.3846	44.7061	70.1826	128.916	86.2596	137.314	0
SBULL_14025.mrna1	48	---NA---											0	0	7	0	1	0	0	8	9	15	12	14	17	0		0	0	0	0	0	0	0	65.1676	92.1779	113.249	119.613	142.285	96.2616	0
SBULL_14028.mrna1	228	paired amphipathic helix protein Sin3a isoform X1	2	C:GO:0005634; P:GO:0006355	C:nucleus; P:regulation of transcription, DNA-templated						NP_001246282.1 Sin3A, isoform G [Drosophila melanogaster]		44	0	1050	26	17	24	11	38	44	40	19	30	45	27		8.17854	23.829	44.0272	9.54671	8.36789	7.01146	10.0059	9.9002	15.6209	11.6313	11.6024	14.2655	10.1774	16.3578
SBULL_1403.mrna1	375	leucine--tRNA ligase, cytoplasmic	10	F:GO:0002161; F:GO:0004252; F:GO:0004823; F:GO:0005524; C:GO:0005737; P:GO:0006429; P:GO:0006508; C:GO:0017101; P:GO:0042060; P:GO:0106074	F:aminoacyl-tRNA editing activity; F:serine-type endopeptidase activity; F:leucine-tRNA ligase activity; F:ATP binding; C:cytoplasm; P:leucyl-tRNA aminoacylation; P:proteolysis; C:aminoacyl-tRNA synthetase multienzyme complex; P:wound healing; P:aminoacyl-tRNA metabolism involved in translational fidelity	EC:3.4.21; EC:6.1.1.4; EC:3.1.1.1	Acting on peptide bonds (peptidases); Leucine--tRNA ligase; Carboxylesterase				NP_787968.1 Leucyl-tRNA synthetase, isoform A [Drosophila melanogaster]		117	119	1641	83	228	114	52	399	330	399	635	476	583	470		9.87863	15.5313	31.7301	14.896	45.4183	12.8575	5.27361	28.9927	27.134	26.8713	56.4604	43.1529	29.4473	107.459
SBULL_14030.mrna1	173	paired amphipathic helix protein Sin3a isoform X4	2	C:GO:0005634; P:GO:0006355	C:nucleus; P:regulation of transcription, DNA-templated								10	34	215	9	9	4	5	29	33	37	31	34	56	5		2.60125	13.3353	11.6293	4.79494	5.09197	1.40193	1.71174	8.71279	10.3401	10.6357	10.6613	11.9309	11.3743	3.04888
SBULL_14034.mrna1	115	protein unc-13 homolog A-like	6	F:GO:0005509; F:GO:0005543; C:GO:0005622; P:GO:0007268; F:GO:0019992; P:GO:0035556	F:calcium ion binding; F:phospholipid binding; C:intracellular; P:chemical synaptic transmission; F:diacylglycerol binding; P:intracellular signal transduction						NP_001284717.1 unc-13, isoform G [Drosophila melanogaster]		0	0	12	7	6	2	7	5	5	11	10	8	13	10		0	0	1.15429	8.00966	4.65719	1.48145	4.39834	2.35902	2.66942	4.81012	5.7732	4.70912	4.26351	11.6469
SBULL_14036.mrna1	610	twinkle protein, mitochondrial	6	F:GO:0003697; F:GO:0005524; P:GO:0006264; P:GO:0032508; C:GO:0042645; F:GO:0043139	F:single-stranded DNA binding; F:ATP binding; P:mitochondrial DNA replication; P:DNA duplex unwinding; C:mitochondrial nucleoid; F:5'-3' DNA helicase activity	EC:3.6.1.15	Nucleoside-triphosphate phosphatase				NP_609318.1 mitochondrial DNA helicase [Drosophila melanogaster]		96	396	1257	9	146	30	31	107	77	152	132	159	182	157		4.90504	31.1055	14.4423	0.847919	16.9504	2.04522	1.97929	4.7329	3.63253	6.37012	6.94966	8.52365	5.60723	20.9149
SBULL_1404.mrna1	340	leucine--tRNA ligase, cytoplasmic	12	F:GO:0002161; F:GO:0004252; F:GO:0004823; F:GO:0004832; F:GO:0005524; C:GO:0005829; P:GO:0006429; P:GO:0006438; P:GO:0006508; C:GO:0017101; P:GO:0042060; P:GO:0106074	F:aminoacyl-tRNA editing activity; F:serine-type endopeptidase activity; F:leucine-tRNA ligase activity; F:valine-tRNA ligase activity; F:ATP binding; C:cytosol; P:leucyl-tRNA aminoacylation; P:valyl-tRNA aminoacylation; P:proteolysis; C:aminoacyl-tRNA synthetase multienzyme complex; P:wound healing; P:aminoacyl-tRNA metabolism involved in translational fidelity	EC:3.4.21; EC:6.1.1.4; EC:6.1.1.9; EC:3.1.1.1	Acting on peptide bonds (peptidases); Leucine--tRNA ligase; Valine--tRNA ligase; Carboxylesterase				NP_787968.1 Leucyl-tRNA synthetase, isoform A [Drosophila melanogaster]		214	156	1655	116	357	294	107	421	294	385	609	575	649	512		21.9316	23.7369	35.2407	22.6642	77.7892	40.6598	14.4518	34.5282	27.285	29.2654	61.1173	58.8366	36.9998	131.28
SBULL_14040.mrna1	624	nucleolar protein 58	1	C:GO:0005730	C:nucleolus						NP_477412.1 nop5 [Drosophila melanogaster]		571	752	8454	136	1771	449	305	1030	982	1159	1570	1871	1879	3492		29.1602	56.4152	94.9059	14.054	199.374	30.8755	19.8968	41.3229	44.581	43.0961	77.074	93.6516	52.4014	450.677
SBULL_14046.mrna1	168	serine/arginine-rich splicing factor 3	2	F:GO:0003723; F:GO:0008270	F:RNA binding; F:zinc ion binding						NP_001260168.1 x16 splicing factor, isoform B [Drosophila melanogaster]		20	146	516	5	48	26	38	153	153	222	312	323	361	45		4.88748	50.3699	28.9339	2.22684	24.7878	8.41793	12.5191	34.0264	38.5036	45.7592	84.9052	89.6221	55.8077	27.2698
SBULL_1405.mrna1	312	leucine--tRNA ligase, cytoplasmic	12	F:GO:0002161; F:GO:0004252; F:GO:0004823; F:GO:0004832; F:GO:0005524; C:GO:0005829; P:GO:0006429; P:GO:0006438; P:GO:0006508; C:GO:0017101; P:GO:0042060; P:GO:0106074	F:aminoacyl-tRNA editing activity; F:serine-type endopeptidase activity; F:leucine-tRNA ligase activity; F:valine-tRNA ligase activity; F:ATP binding; C:cytosol; P:leucyl-tRNA aminoacylation; P:valyl-tRNA aminoacylation; P:proteolysis; C:aminoacyl-tRNA synthetase multienzyme complex; P:wound healing; P:aminoacyl-tRNA metabolism involved in translational fidelity	EC:3.4.21; EC:6.1.1.4; EC:6.1.1.9; EC:3.1.1.1	Acting on peptide bonds (peptidases); Leucine--tRNA ligase; Valine--tRNA ligase; Carboxylesterase				NP_787968.1 Leucyl-tRNA synthetase, isoform A [Drosophila melanogaster]		144	89	1327	62	105	101	49	319	315	317	463	429	462	332		13.638	13.3741	32.0133	13.7819	23.0672	13.1664	7.06525	29.1655	32.5892	26.862	51.7981	48.9354	29.3618	94.2889
SBULL_14050.mrna1	795	metal transporter CNNM4	1	C:GO:0016021	C:integral component of membrane						NP_001288144.1 unextended, isoform H [Drosophila melanogaster]		79	12025	7453	132	245	91	144	336	325	330	359	438	556	279		3.03637	678.549	62.0849	9.65615	18.7639	4.42705	6.93248	10.3092	11.2838	9.38429	13.4783	16.7667	11.8583	27.7382
SBULL_14059.mrna1	176	cysteine-rich PDZ-binding protein	3	F:GO:0030165; C:GO:0030425; P:GO:0031122	F:PDZ domain binding; C:dendrite; P:cytoplasmic microtubule organization						NP_001097135.1 uncharacterized protein Dmel_CG4537 [Drosophila melanogaster]		187	77	121	40	57	66	79	56	37	89	55	37	104	13		47.6182	30.5476	7.68144	20.7376	31.965	22.5182	26.3199	16.5281	10.7542	21.6378	16.9381	14.9503	20.5368	9.52085
SBULL_1406.mrna1	93	GA17300	10	F:GO:0002161; F:GO:0004252; F:GO:0004823; F:GO:0005524; C:GO:0005737; P:GO:0006429; P:GO:0006508; C:GO:0017101; P:GO:0042060; P:GO:0106074	F:aminoacyl-tRNA editing activity; F:serine-type endopeptidase activity; F:leucine-tRNA ligase activity; F:ATP binding; C:cytoplasm; P:leucyl-tRNA aminoacylation; P:proteolysis; C:aminoacyl-tRNA synthetase multienzyme complex; P:wound healing; P:aminoacyl-tRNA metabolism involved in translational fidelity	EC:3.4.21; EC:6.1.1.4; EC:3.1.1.1	Acting on peptide bonds (peptidases); Leucine--tRNA ligase; Carboxylesterase				NP_787968.1 Leucyl-tRNA synthetase, isoform A [Drosophila melanogaster]		70	70	284	36	83	89	40	83	49	61	100	89	118	45		56.611	83.8545	31.6088	44.5587	85.5545	102.558	50.3975	68.1418	45.5215	46.4158	100.459	91.1618	67.341	79.0965
SBULL_14064.mrna1	118	battenin	10	C:GO:0005765; C:GO:0005770; P:GO:0006979; P:GO:0008340; P:GO:0008593; C:GO:0016021; C:GO:0016324; C:GO:0031528; C:GO:0031966; P:GO:0046328	C:lysosomal membrane; C:late endosome; P:response to oxidative stress; P:determination of adult lifespan; P:regulation of Notch signaling pathway; C:integral component of membrane; C:apical plasma membrane; C:microvillus membrane; C:mitochondrial membrane; P:regulation of JNK cascade						NP_649011.1 Cln3, isoform A [Drosophila melanogaster]		86	11	41	24	11	67	8	21	11	24	26	27	50	3		40.1656	7.02898	2.85142	18.3621	7.72726	42.0235	5.53759	9.33317	5.53207	9.88604	14.1396	14.9714	15.4469	3.33835
SBULL_14066.mrna1	57	battenin	14	C:GO:0005765; C:GO:0005770; P:GO:0006979; P:GO:0007034; P:GO:0007040; P:GO:0008340; P:GO:0008593; P:GO:0015809; C:GO:0016021; C:GO:0016324; C:GO:0031528; C:GO:0031966; P:GO:0046328; P:GO:0051453	C:lysosomal membrane; C:late endosome; P:response to oxidative stress; P:vacuolar transport; P:lysosome organization; P:determination of adult lifespan; P:regulation of Notch signaling pathway; P:arginine transport; C:integral component of membrane; C:apical plasma membrane; C:microvillus membrane; C:mitochondrial membrane; P:regulation of JNK cascade; P:regulation of intracellular pH						NP_649011.1 Cln3, isoform A [Drosophila melanogaster]		11	3	4	7	1	7	1	6	1	12	7	7	15	0		0	0	4.05991	0	0	0	0	25.3524	4.78137	46.9948	36.1926	36.9023	44.0576	0
SBULL_14067.mrna1	52	battenin	10	C:GO:0005765; C:GO:0005770; P:GO:0006979; P:GO:0008340; P:GO:0008593; C:GO:0016021; C:GO:0016324; C:GO:0031528; C:GO:0031966; P:GO:0046328	C:lysosomal membrane; C:late endosome; P:response to oxidative stress; P:determination of adult lifespan; P:regulation of Notch signaling pathway; C:integral component of membrane; C:apical plasma membrane; C:microvillus membrane; C:mitochondrial membrane; P:regulation of JNK cascade						NP_649011.1 Cln3, isoform A [Drosophila melanogaster]		26	0	22	6	3	9	8	12	9	6	9	15	16	1		1440.84	0	30.5172	1685.49	186.945	223.287	0	71.6986	60.8494	33.2262	65.8001	111.817	66.4525	9.96566
SBULL_14075.mrna1	336	potassium/sodium hyperpolarization-activated cyclic nucleotide-gated channel 2	3	F:GO:0005216; C:GO:0016021; P:GO:0034220	F:ion channel activity; C:integral component of membrane; P:ion transmembrane transport						NP_001261141.1 uncharacterized protein Dmel_CG42260, isoform D [Drosophila melanogaster]		2	0	4	0	0	0	0	3	1	2	0	0	0	0		1.15863	0	0.162312	0	0	0	0	0.249407	0.282224	0.385264	0	0.103723	0.0577896	0
SBULL_14076.mrna1	323	cyclic nucleotide-gated cation channel alpha-3 isoform X1	3	P:GO:0006811; C:GO:0016021; P:GO:0055085	P:ion transport; C:integral component of membrane; P:transmembrane transport						NP_611717.2 uncharacterized protein Dmel_CG42260, isoform B [Drosophila melanogaster]		11	0	2	1	2	1	1	3	0	0	0	1	2	2		2.54628	0.166355	0.292362	0.894611	0.485752	0.148348	0.287871	0.437416	0.296983	0.162165	0.214097	0.436589	0.121623	0.817444
SBULL_14082.mrna1	1538	transcription factor SPT20 homolog	3	C:GO:0000932; C:GO:0005634; C:GO:0005737	C:P-body; C:nucleus; C:cytoplasm						NP_726620.2 eIF4E-Transporter, isoform C [Drosophila melanogaster]		973	1513	17102	1111	2035	1981	2770	4469	4846	4032	4655	4394	6117	1348		18.4491	43.2009	72.7889	41.0837	82.6315	50.5082	69.1055	67.8113	83.207	56.7039	86.4303	83.1839	64.5197	66.9663
SBULL_14091.mrna1	919	tubulin polyglutamylase TTLL5	2	F:GO:0005524; P:GO:0006464	F:ATP binding; P:cellular protein modification process						NP_733081.1 uncharacterized protein Dmel_CG31108, isoform A [Drosophila melanogaster]		2412	802	4584	174	137	87	146	1348	963	952	881	947	1324	178		77.2724	38.35	33.1896	11.1645	9.21659	3.74074	6.23191	35.3328	28.5627	23.1274	28.2565	30.9689	24.1234	14.9958
SBULL_14098.mrna1	622	inverted repeat-binding protein	8	P:GO:0000723; F:GO:0003677; F:GO:0004386; C:GO:0005694; P:GO:0006303; C:GO:0043564; F:GO:0046982; F:GO:0140097	P:telomere maintenance; F:DNA binding; F:helicase activity; C:chromosome; P:double-strand break repair via nonhomologous end joining; C:Ku70:Ku80 complex; F:protein heterodimerization activity; F:catalytic activity, acting on DNA	EC:3.6.1.15	Nucleoside-triphosphate phosphatase				NP_536773.1 inverted repeat-binding protein, isoform A [Drosophila melanogaster]		111	119	1131	83	125	139	136	367	332	385	376	427	584	139		5.72899	9.2167	12.6521	8.60781	14.2024	9.59253	9.08251	14.777	15.1266	14.3675	18.5251	21.4504	16.3453	18.0126
SBULL_14100.mrna1	497	protein anon-37Cs	2	F:GO:0016491; P:GO:0055114	F:oxidoreductase activity; P:oxidation-reduction process						NP_476608.1 uncharacterized protein Dmel_CG10561 [Drosophila melanogaster]		2622	29	421	227	81	74	61	1389	725	744	232	222	545	79		173.804	2.89006	6.12306	30.322	11.8277	6.57233	5.24627	72.1681	42.6251	35.8275	14.7498	14.3908	19.6835	13.1022
SBULL_14104.mrna1	628	alpha-methyldopa hypersensitive protein isoform X2	7	P:GO:0006520; P:GO:0006584; F:GO:0016831; F:GO:0019239; F:GO:0030170; P:GO:0040003; F:GO:0042302	P:cellular amino acid metabolic process; P:catecholamine metabolic process; F:carboxy-lyase activity; F:deaminase activity; F:pyridoxal phosphate binding; P:chitin-based cuticle development; F:structural constituent of cuticle						NP_476592.1 alpha methyl dopa-resistant, isoform A [Drosophila melanogaster]		0	0	6727	4	0	0	0	298	380	68	3	3	3	0		0	0	75.1441	0.410417	0	0	0	11.8702	17.1281	2.51044	0.146223	0.14909	0.0830661	0
SBULL_14110.mrna1	450	aromatic-L-amino-acid decarboxylase isoform X2	11	F:GO:0004058; P:GO:0006585; P:GO:0006587; P:GO:0007615; P:GO:0007616; P:GO:0009611; F:GO:0030170; P:GO:0035220; P:GO:0040040; P:GO:0043052; P:GO:0048082	F:aromatic-L-amino-acid decarboxylase activity; P:dopamine biosynthetic process from tyrosine; P:serotonin biosynthetic process from tryptophan; P:anesthesia-resistant memory; P:long-term memory; P:response to wounding; F:pyridoxal phosphate binding; P:wing disc development; P:thermosensory behavior; P:thermotaxis; P:regulation of adult chitin-containing cuticle pigmentation	EC:4.1.1.28	Aromatic-L-amino-acid decarboxylase				NP_724163.1 dopa decarboxylase, isoform C [Drosophila melanogaster]		59	576	1443	174	274	344	181	292	160	705	2300	2221	5252	213		4.32007	61.9545	22.2585	25.3462	38.1539	33.0924	17.0904	17.0515	10.5727	38.1566	164.347	161.814	213.19	39.3403
SBULL_14116.mrna1	105	coiled-coil domain-containing protein 63	3	P:GO:0003341; C:GO:0005930; P:GO:0036158	P:cilium movement; C:axoneme; P:outer dynein arm assembly						NP_650569.1 uncharacterized protein Dmel_CG14905 [Drosophila melanogaster]		16	0	11	0	0	0	0	2	1	1	0	1	2	0		1.34014	0	1.25648	0	0	0	0	1.18028	0.667791	0.546961	0	0.736281	0.820442	0
SBULL_14118.mrna1	293	Syntaxin-1A	20	F:GO:0000149; P:GO:0000281; F:GO:0003743; F:GO:0005484; C:GO:0005765; C:GO:0005886; P:GO:0006413; P:GO:0006886; P:GO:0007274; P:GO:0007317; P:GO:0007349; P:GO:0007482; C:GO:0016021; P:GO:0016081; P:GO:0017157; C:GO:0030054; C:GO:0030672; C:GO:0031201; P:GO:0031629; C:GO:0043195	F:SNARE binding; P:mitotic cytokinesis; F:translation initiation factor activity; F:SNAP receptor activity; C:lysosomal membrane; C:plasma membrane; P:translational initiation; P:intracellular protein transport; P:neuromuscular synaptic transmission; P:regulation of pole plasm oskar mRNA localization; P:cellularization; P:haltere development; C:integral component of membrane; P:synaptic vesicle d…						NP_524475.1 syntaxin 1A, isoform A [Drosophila melanogaster]		197	1087	902	152	253	483	220	137	158	167	110	124	186	75		22.6389	201.357	23.5145	34.9158	65.5269	66.0698	31.9101	13.6827	18.0635	15.3465	13.5883	15.3391	12.9572	22.9784
SBULL_14124.mrna1	110	ATP-binding cassette sub-family G member 1	6	F:GO:0005524; C:GO:0005886; C:GO:0016021; F:GO:0017127; P:GO:0030301; F:GO:0034041	F:ATP binding; C:plasma membrane; C:integral component of membrane; F:cholesterol transporter activity; P:cholesterol transport; F:sterol-transporting ATPase activity	EC:3.6.1.3; EC:3.6.1.15	Adenosinetriphosphatase; Nucleoside-triphosphate phosphatase				NP_608760.2 uncharacterized protein Dmel_CG9663 [Drosophila melanogaster]		5	34	26	16	4	19	40	33	27	62	40	37	76	2		2.40199	20.989	2.78142	13.9682	5.12452	11.4711	27.6433	17.3252	17.2285	31.1419	26.3392	24.2356	29.1955	2.52509
SBULL_14125.mrna1	1229	myb-like protein P									NP_610898.1 uncharacterized protein Dmel_CG6280 [Drosophila melanogaster]		0	2	87	0	0	0	0	4622	37929	436	94	97	111	0		0	0.0742962	0.471197	0	0	0	0	88.7994	824.586	7.76367	2.20985	2.32509	1.4824	0
SBULL_14140.mrna1	292	protein ecdysoneless	4	P:GO:0009987; P:GO:0048513; P:GO:0048598; P:GO:0051704	P:cellular process; P:animal organ development; P:embryonic morphogenesis; P:multi-organism process						NP_647707.1 ecdysoneless [Drosophila melanogaster]		34	13	396	31	20	41	56	160	166	128	318	403	392	32		4.27109	2.45476	10.6617	7.87787	5.23172	7.24214	9.64777	17.7275	21.8632	13.3843	44.481	55.4178	31.1531	9.84494
SBULL_14142.mrna1	221	Down syndrome cell adhesion molecule-like protein 1 homolog	1	C:GO:0016021	C:integral component of membrane						NP_001285904.1 uncharacterized protein Dmel_CG31814, isoform B [Drosophila melanogaster]		0	0	23	2	1	0	0	3	2	11	1	0	4	8		0	0	0.915674	0.738788	0.396914	0	0	0.437462	0.330015	1.48666	0.178432	0	0.405454	3.4943
SBULL_14144.mrna1	149	larval cuticle protein LCP-22	1	F:GO:0042302	F:structural constituent of cuticle						NP_610773.1 cuticular protein 49Ad [Drosophila melanogaster]		0	0	0	0	0	0	0	0	0	1	0	0	1	93		0	0	0	0	0	0	0	0	0	0.255345	0	0	0.191509	70.6908
SBULL_14147.mrna1	138	putative GPI-anchored protein pfl2 isoform X2									NP_788560.3 uncharacterized protein Dmel_CG10508, isoform L [Drosophila melanogaster]		29	284	106	41	59	61	93	14	10	24	11	12	25	2		10.6315	160.741	7.87644	32.2409	47.5724	30.831	45.925	4.78174	5.05019	7.6819	6.24121	4.77269	6.86939	1.71348
SBULL_14149.mrna1	227	Phosphoribosylformylglycinamidine synthase	3	F:GO:0004642; P:GO:0006189; P:GO:0006541	F:phosphoribosylformylglycinamidine synthase activity; P:'de novo' IMP biosynthetic process; P:glutamine metabolic process	EC:6.3.5.3	Phosphoribosylformylglycinamidine synthase				NP_723147.1 adenosine 2, isoform C [Drosophila melanogaster]		0	0	0	0	0	0	0	0	0	0	0	0	0	0		6.30235	23.1835	14.5078	3.20182	8.80069	16.2246	31.1173	8.13837	7.93897	7.803	14.5943	20.1324	15.2158	61.1647
SBULL_1415.mrna1	1129	Dorsal-ventral patterning protein tolloid	9	F:GO:0004222; F:GO:0005509; P:GO:0007415; P:GO:0008045; F:GO:0008270; P:GO:0008586; P:GO:0010629; C:GO:0016020; P:GO:0016485	F:metalloendopeptidase activity; F:calcium ion binding; P:defasciculation of motor neuron axon; P:motor neuron axon guidance; F:zinc ion binding; P:imaginal disc-derived wing vein morphogenesis; P:negative regulation of gene expression; C:membrane; P:protein processing	EC:3.4.24	Acting on peptide bonds (peptidases)				NP_733035.1 tolkin, isoform B [Drosophila melanogaster]		20	8	329	157	24	19	27	387	251	222	218	38	227	28		0.758556	0.568838	2.12703	8.69049	2.15005	0.977166	1.25946	11.9412	9.87259	8.86565	8.41202	4.19668	6.03546	2.12636
SBULL_14151.mrna1	76	FAST kinase domain-containing protein 1, mitochondrial isoform X1	2	F:GO:0004672; P:GO:0006468	F:protein kinase activity; P:protein phosphorylation						NP_723145.1 uncharacterized protein Dmel_CG31643, isoform A [Drosophila melanogaster]		1	0	88	0	0	0	3	3	8	9	2	13	12	8		2.03665	0	16.8461	0	0	0	9.41295	4.59761	13.8735	12.7836	3.75056	24.8566	12.7836	22.5082
SBULL_14155.mrna1	311	FAST kinase domain-containing protein 1, mitochondrial	2	F:GO:0004672; P:GO:0006468	F:protein kinase activity; P:protein phosphorylation						NP_723145.1 uncharacterized protein Dmel_CG31643, isoform A [Drosophila melanogaster]		7	2	400	5	13	9	65	20	18	36	23	16	30	16		0.696241	0.174389	9.01172	0.938157	2.54496	0.933139	9.35788	1.83608	1.86991	3.06313	2.58372	1.83261	1.91446	4.56158
SBULL_14156.mrna1	182	FAST kinase domain-containing protein 1, mitochondrial	2	F:GO:0004672; P:GO:0006468	F:protein kinase activity; P:protein phosphorylation						NP_723145.1 uncharacterized protein Dmel_CG31643, isoform A [Drosophila melanogaster]		16	2	181	6	16	15	125	25	15	22	13	10	19	2		3.85022	0.72534	8.88014	2.95184	8.38363	4.85991	37.6274	4.89311	3.32216	3.99088	3.11345	2.44193	2.585	1.13528
SBULL_14157.mrna1	177	FAST kinase domain-containing protein 1, mitochondrial	2	F:GO:0004672; P:GO:0006468	F:protein kinase activity; P:protein phosphorylation						NP_723145.1 uncharacterized protein Dmel_CG31643, isoform A [Drosophila melanogaster]		12	4	207	3	8	18	121	19	17	21	19	11	31	24		2.76197	1.51404	10.2457	1.02767	3.82482	4.73471	30.0491	3.88941	4.40117	3.98428	4.75925	2.80938	4.41117	14.1672
SBULL_14162.mrna1	699	phosphoribosylformylglycinamidine synthase	3	F:GO:0004642; P:GO:0006189; P:GO:0006541	F:phosphoribosylformylglycinamidine synthase activity; P:'de novo' IMP biosynthetic process; P:glutamine metabolic process	EC:6.3.5.3	Phosphoribosylformylglycinamidine synthase				NP_723147.1 adenosine 2, isoform C [Drosophila melanogaster]		43	171	984	26	96	67	151	74	92	95	195	163	230	288		3.90225	22.0584	18.2846	4.46505	13.9894	10.1297	18.309	6.71659	8.76041	8.0927	17.6919	17.2449	13.7609	69.8709
SBULL_14167.mrna1	176	receptor-like kinase LIP2	1	C:GO:0016021	C:integral component of membrane						NP_650785.1 uncharacterized protein Dmel_CG5835 [Drosophila melanogaster]		15	6	127	65	98	73	64	32	12	52	29	34	77	14		3.79932	2.29107	6.79725	32.6617	51.2542	23.8829	20.9893	8.88388	5.37708	13.2125	11.3763	11.5994	16.6592	8.33074
SBULL_14171.mrna1	246	uncharacterized protein LOC111677806	1	P:GO:0045475	P:locomotor rhythm						NP_652049.1 quasimodo, isoform A [Drosophila melanogaster]		0	5	0	23	24	33	8	13	0	42	0	0	3	0		0	1.18084	0	7.00747	8.24437	6.95434	1.63915	1.62936	0	4.87893	0	0	0.261371	0
SBULL_14173.mrna1	147	PREDICTED: uncharacterized protein LOC108368028	2	C:GO:0005634; P:GO:0006915	C:nucleus; P:apoptotic process						NP_001286880.1 uncharacterized protein Dmel_CG30428, isoform B [Drosophila melanogaster]		0	0	2	0	0	1	0	7	1	2	4	0	5	2		0	0	0.14725	0	0	0.458853	0	1.97737	0.31965	0.523625	1.38263	0	0.981798	1.55208
SBULL_14176.mrna1	302	---NA---											3	0	876	4	33	7	0	6	1	3	0	0	1	2		0.481557	0	25.711	0.973704	10.0308	1.12964	0	0.66735	0.32364	0.530161	0	0	0.19881	0.295356
SBULL_14181.mrna1	225	protein mab-21-like	3	F:GO:0003674; C:GO:0005575; P:GO:0008150	F:molecular_function; C:cellular_component; P:biological_process						NP_572287.1 uncharacterized protein Dmel_CG4766 [Drosophila melanogaster]		1	0	61	14	4	15	22	177	264	146	330	232	190	1		0	0	1.9423	3.24171	1.54913	2.85649	4.16969	25.1525	42.4519	19.2292	57.3821	41.1324	18.7683	0.426698
SBULL_14185.mrna1	325	Protocadherin-like wing polarity protein stan	7	F:GO:0004930; F:GO:0005509; C:GO:0005886; P:GO:0007156; P:GO:0007166; P:GO:0007186; C:GO:0016021	F:G-protein coupled receptor activity; F:calcium ion binding; C:plasma membrane; P:homophilic cell adhesion via plasma membrane adhesion molecules; P:cell surface receptor signaling pathway; P:G-protein coupled receptor signaling pathway; C:integral component of membrane						NP_001260871.1 starry night, isoform F [Drosophila melanogaster]		7	4	109	6	1	0	1	105	155	79	137	90	111	10		0.769065	0.660351	2.58721	1.10968	0.241042	0	0.142832	9.11425	15.2247	6.35564	14.5515	9.7468	6.69756	2.70486
SBULL_14186.mrna1	234	Protocadherin-like wing polarity protein stan	7	F:GO:0004930; F:GO:0005509; C:GO:0005886; P:GO:0007156; P:GO:0007166; P:GO:0007186; C:GO:0016021	F:G-protein coupled receptor activity; F:calcium ion binding; C:plasma membrane; P:homophilic cell adhesion via plasma membrane adhesion molecules; P:cell surface receptor signaling pathway; P:G-protein coupled receptor signaling pathway; C:integral component of membrane						NP_001246257.1 starry night, isoform D [Drosophila melanogaster]		12	15	92	13	7	1	2	121	141	80	110	124	133	8		1.84741	2.77964	3.2415	4.09281	1.83615	0.225519	0.219372	16.531	21.4436	9.96517	18.419	21.1277	12.5187	3.24492
SBULL_14187.mrna1	170	Protocadherin-like wing polarity protein stan	7	F:GO:0004930; F:GO:0005509; C:GO:0005886; P:GO:0007156; P:GO:0007166; P:GO:0007186; C:GO:0016021	F:G-protein coupled receptor activity; F:calcium ion binding; C:plasma membrane; P:homophilic cell adhesion via plasma membrane adhesion molecules; P:cell surface receptor signaling pathway; P:G-protein coupled receptor signaling pathway; C:integral component of membrane						NP_001246257.1 starry night, isoform D [Drosophila melanogaster]		14	16	87	14	6	7	16	105	114	73	107	76	105	7		3.74278	6.45058	4.254	7.12292	3.48737	2.1618	5.28082	22.9698	28.22	14.801	28.6421	20.7429	15.9668	4.37671
SBULL_14190.mrna1	62	Protocadherin-like wing polarity protein stan	7	F:GO:0004930; F:GO:0005509; C:GO:0005886; P:GO:0007156; P:GO:0007166; P:GO:0007186; C:GO:0016021	F:G-protein coupled receptor activity; F:calcium ion binding; C:plasma membrane; P:homophilic cell adhesion via plasma membrane adhesion molecules; P:cell surface receptor signaling pathway; P:G-protein coupled receptor signaling pathway; C:integral component of membrane						NP_001246257.1 starry night, isoform D [Drosophila melanogaster]		0	0	10	0	1	0	0	19	22	19	28	15	35	0		0	0	1.37198	0	0	0	0	62.0758	77.268	57.5338	113.938	85.1928	79.8282	0
SBULL_142.mrna1	252	uncharacterized protein LOC111684416	1	C:GO:0016020	C:membrane						NP_731058.1 osiris 10 [Drosophila melanogaster]		1	0	7	0	0	0	0	0	0	0	0	0	0	0		0.152047	0	0.233656	0	0	0	0	0	0	0	0	0	0	0
SBULL_14202.mrna1	341	Protocadherin-like wing polarity protein stan	7	F:GO:0004930; F:GO:0005509; C:GO:0005886; P:GO:0007156; P:GO:0007166; P:GO:0007186; C:GO:0016021	F:G-protein coupled receptor activity; F:calcium ion binding; C:plasma membrane; P:homophilic cell adhesion via plasma membrane adhesion molecules; P:cell surface receptor signaling pathway; P:G-protein coupled receptor signaling pathway; C:integral component of membrane						NP_724962.3 starry night, isoform A [Drosophila melanogaster]		9	4	82	4	0	0	3	94	128	84	111	95	125	6		0.932121	0.622411	1.64175	0.836378	0	0	0.269152	7.68115	11.8357	6.36178	11.0988	9.68522	7.1002	1.53312
SBULL_14207.mrna1	314	Protocadherin-like wing polarity protein stan	7	F:GO:0004930; F:GO:0005509; C:GO:0005886; P:GO:0007156; P:GO:0007166; P:GO:0007186; C:GO:0016021	F:G-protein coupled receptor activity; F:calcium ion binding; C:plasma membrane; P:homophilic cell adhesion via plasma membrane adhesion molecules; P:cell surface receptor signaling pathway; P:G-protein coupled receptor signaling pathway; C:integral component of membrane						NP_001246257.1 starry night, isoform D [Drosophila melanogaster]		4	3	132	8	0	2	3	96	113	76	128	89	115	3		0.11466	0.516926	3.25432	1.62204	0	0	0.149121	8.7057	11.5957	6.38774	14.2036	10.0696	7.24924	0.845508
SBULL_14214.mrna1	226	Protocadherin-like wing polarity protein stan	7	F:GO:0004930; F:GO:0005509; C:GO:0005886; P:GO:0007156; P:GO:0007166; P:GO:0007186; C:GO:0016021	F:G-protein coupled receptor activity; F:calcium ion binding; C:plasma membrane; P:homophilic cell adhesion via plasma membrane adhesion molecules; P:cell surface receptor signaling pathway; P:G-protein coupled receptor signaling pathway; C:integral component of membrane						NP_724962.3 starry night, isoform A [Drosophila melanogaster]		5	5	56	2	0	0	0	64	74	41	70	37	66	3		0.880659	1.3253	2.12365	0.71592	0	0	0	9.03712	11.8241	5.3658	12.0949	6.51838	6.47823	1.27274
SBULL_14218.mrna1	70	Protocadherin-like wing polarity protein stan	7	F:GO:0004930; F:GO:0005509; C:GO:0005886; P:GO:0007156; P:GO:0007166; P:GO:0007186; C:GO:0016021	F:G-protein coupled receptor activity; F:calcium ion binding; C:plasma membrane; P:homophilic cell adhesion via plasma membrane adhesion molecules; P:cell surface receptor signaling pathway; P:G-protein coupled receptor signaling pathway; C:integral component of membrane						NP_001246257.1 starry night, isoform D [Drosophila melanogaster]		1	1	16	0	0	0	0	21	20	15	12	15	32	0		0	0	1.70741	0	0	0	0	42.4637	45.7629	28.112	29.6917	37.8423	44.9791	0
SBULL_14219.mrna2	135	Protein cup	1	C:GO:0016021	C:integral component of membrane						NP_001303310.1 uncharacterized protein Dmel_CG34310, isoform E [Drosophila melanogaster]		0	0	0	0	0	0	0	0	0	0	0	0	0	0		111.071	41.8484	35.7363	19.6754	80.1912	12.3104	9.46886	87.9167	73.8598	81.484	56.6418	58.9988	51.6219	28.3988
SBULL_14222.mrna1	96	alpha-1,3-mannosyl-glycoprotein 2-beta-N-acetylglucosaminyltransferase	9	F:GO:0003827; C:GO:0005797; P:GO:0008340; P:GO:0008344; C:GO:0016021; P:GO:0016319; P:GO:0018279; P:GO:0035010; P:GO:0035284	F:alpha-1,3-mannosylglycoprotein 2-beta-N-acetylglucosaminyltransferase activity; C:Golgi medial cisterna; P:determination of adult lifespan; P:adult locomotory behavior; C:integral component of membrane; P:mushroom body development; P:protein N-linked glycosylation via asparagine; P:encapsulation of foreign target; P:brain segmentation	EC:2.4.1.101	Alpha-1,3-mannosyl-glycoprotein 2-beta-N-acetylglucosaminyltransferase				NP_525117.2 mannosyl (alpha-1,3-)-glycoprotein beta-1,2-N-acetylglucosaminyltransferase 1 [Drosophila melanogaster]		2	20	452	1	2	0	0	8	3	6	2	3	10	1		1.69317	24.5859	73.0938	1.83306	3.56333	0	0	7.50446	3.39676	4.17322	3.67311	2.80885	5.73818	1.64521
SBULL_14225.mrna1	453	mitochondrial sodium/hydrogen exchanger 9B2 isoform X2	3	F:GO:0015299; C:GO:0016021; P:GO:1902600	F:solute:proton antiporter activity; C:integral component of membrane; P:proton transmembrane transport						NP_723224.2 Na[+]/H[+] hydrogen antiporter 1, isoform A [Drosophila melanogaster]		11	25	52	108	52	81	9	3	0	3	5	2	5	63		0.960866	4.43888	1.20631	20.2394	13.65	9.6931	0.958107	0.173821	0.196692	0.375907	0.42539	0.650597	0.322206	22.6541
SBULL_14226.mrna1	124	sodium/hydrogen exchanger 9B2 isoform X2	8	P:GO:0003096; C:GO:0005903; F:GO:0015108; F:GO:0015385; C:GO:0016021; P:GO:0035725; P:GO:1902476; P:GO:1902600	P:renal sodium ion transport; C:brush border; F:chloride transmembrane transporter activity; F:sodium:proton antiporter activity; C:integral component of membrane; P:sodium ion transmembrane transport; P:chloride transmembrane transport; P:proton transmembrane transport						NP_609080.1 Na[+]/H[+] hydrogen antiporter 1, isoform B [Drosophila melanogaster]		4	0	5	53	27	30	4	0	1	0	2	1	2	9		3.72184	2.11436	0.49834	61.1906	61.0075	20.843	2.4911	0.397812	0.450156	0	0.97356	0.496325	0.553058	13.2792
SBULL_14233.mrna1	1202	hypothetical protein FF38_03430											245	3	19	5	1	0	2	49	14	14	9	11	17	0		6.18704	0.114085	0.106563	0.254149	0.0559054	0	0.065481	0.963819	0.311611	0.255228	0.216619	0.269948	0.23244	0
SBULL_14239.mrna1	231	protein commissureless 2 homolog isoform X1	2	P:GO:0007411; C:GO:0016020	P:axon guidance; C:membrane						NP_648791.2 comm3, isoform C [Drosophila melanogaster]		60	100	75	296	291	573	282	33	28	52	12	30	54	119		9.57181	25.7194	2.6987	100.691	101.267	128.545	61.4122	4.51679	4.3367	6.5966	2.0098	5.12301	5.13774	49.0765
SBULL_14242.mrna1	472	leucine-rich repeat and transmembrane domain-containing protein 2	1	C:GO:0016021	C:integral component of membrane						NP_729833.1 uncharacterized protein Dmel_CG42709, isoform B [Drosophila melanogaster]		202	146	1723	156	351	279	259	487	370	712	490	523	914	133		14.2387	15.4501	26.3097	22.1334	54.406	26.314	23.6589	26.8898	23.1177	36.4368	33.1062	36.0287	35.0806	23.3881
SBULL_14247.mrna1	1977	chromodomain-helicase-DNA-binding protein Mi-2 homolog	6	F:GO:0003677; F:GO:0004386; F:GO:0005524; C:GO:0005634; F:GO:0016887; F:GO:0046872	F:DNA binding; F:helicase activity; F:ATP binding; C:nucleus; F:ATPase activity; F:metal ion binding	EC:3.6.1.3; EC:3.6.1.15	Adenosinetriphosphatase; Nucleoside-triphosphate phosphatase				NP_001014591.1 Mi-2, isoform B [Drosophila melanogaster]		1083	4074	16772	417	951	789	1096	2964	2806	2754	5173	4320	4931	866		16.2731	91.8039	55.4072	12.4558	31.3372	15.7833	21.267	34.6321	37.0999	29.824	73.9601	62.9755	40.0495	33.1973
SBULL_14249.mrna1	290	exosome complex component MTR3	1	C:GO:0044424	C:intracellular part						NP_649157.1 Mtr3 [Drosophila melanogaster]		238	68	283	19	80	33	16	117	112	105	92	111	185	137		31.4269	13.5246	8.35838	5.8967	21.109	6.11659	2.80449	15.0735	16.9431	13.7843	16.3542	20.3107	17.9522	47.1562
SBULL_14285.mrna1	362	aldose reductase isoform X2	2	F:GO:0016491; P:GO:0055114	F:oxidoreductase activity; P:oxidation-reduction process						NP_001261717.1 uncharacterized protein Dmel_CG6084, isoform D [Drosophila melanogaster]		7086	24	182	392	11	18	25	1080	491	471	68	94	300	11		677.533	3.4726	3.54304	74.4308	2.11493	2.32206	3.12716	81.9469	42.1575	33.1231	6.31353	8.89866	15.8231	2.6204
SBULL_14289.mrna1	140	ribosomal protein S12	3	P:GO:0002181; F:GO:0003735; C:GO:0022627	P:cytoplasmic translation; F:structural constituent of ribosome; C:cytosolic small ribosomal subunit						NP_729866.1 ribosomal protein S12 [Drosophila melanogaster]		1386	2035	38464	3144	3522	1643	746	12978	11960	18743	13445	11043	19940	23054		490.592	1058.67	2827.58	2322.66	2517.34	755.783	341.002	4022.41	4194.64	5384.16	5099.48	4270.25	4296.01	19251.1
SBULL_14293.mrna1	346	alcohol dehydrogenase [NADP(+)]	2	F:GO:0016491; P:GO:0055114	F:oxidoreductase activity; P:oxidation-reduction process						NP_648485.1 uncharacterized protein Dmel_CG6083 [Drosophila melanogaster]		1324	6	111	73	5	5	8	383	240	171	35	57	125	4		134.305	0.764291	2.15071	14.9928	1.11666	0.681473	1.05751	30.7336	21.7927	12.7178	3.43667	5.7066	6.97248	1.0047
SBULL_14297.mrna1	669	U4/U6 small nuclear ribonucleoprotein Prp3 isoform X1	2	P:GO:0000398; C:GO:0046540	P:mRNA splicing, via spliceosome; C:U4/U6 x U5 tri-snRNP complex						NP_649156.1 precursor RNA processing 3, isoform A [Drosophila melanogaster]		54	16	158	2	10	1	1	15	17	25	30	14	21	31		71.997	39.3684	10.0976	12.0513	14.2593	7.63913	9.30061	21.1185	15.3715	14.4478	16.8038	18.6614	14.1898	25.9788
SBULL_14308.mrna1	46	---NA---											1	0	9	0	0	0	0	26	16	22	38	23	42	0		0	0	24.6836	0	0	0	0	250.512	174.445	196.462	448.015	276.484	281.298	0
SBULL_14311.mrna1	267	metaxin-2 isoform X1	1	C:GO:0001401	C:mitochondrial sorting and assembly machinery complex						NP_649161.1 uncharacterized protein Dmel_CG8004 [Drosophila melanogaster]		486	178	1704	200	164	213	170	519	373	627	261	320	459	329		68.0689	37.5087	49.4106	56.8133	49.9992	40.2683	31.2253	58.1833	47.3179	65.1478	35.8036	44.7578	35.769	112.979
SBULL_14312.mrna1	1362	protein suppressor of hairy wing	1	F:GO:0003676	F:nucleic acid binding						NP_648789.3 uncharacterized protein Dmel_CG7372 [Drosophila melanogaster]		79	772	2459	25	97	52	80	355	330	228	727	701	601	43		1.71219	25.5097	11.7817	1.06949	4.60923	1.48501	2.26763	6.11934	6.43688	3.64261	15.3343	15.0759	7.20133	2.42493
SBULL_14333.mrna1	754	serine/threonine-protein kinase unc-51 isoform X1	3	F:GO:0004674; F:GO:0005524; P:GO:0006468	F:protein serine/threonine kinase activity; F:ATP binding; P:protein phosphorylation	EC:2.7.11	Transferring phosphorus-containing groups				NP_648601.1 Autophagy-related 1, isoform A [Drosophila melanogaster]		498	2477	3382	401	469	760	2368	778	705	752	784	869	985	217		20.8011	155.224	30.9384	33.6259	43.1495	42.4305	127.881	25.2975	25.9401	22.663	31.1939	35.2538	22.2637	22.8339
SBULL_1434.mrna1	203	ras-related C3 botulinum toxin substrate 1	16	P:GO:0001737; F:GO:0003924; F:GO:0005525; C:GO:0005622; P:GO:0007254; P:GO:0007264; P:GO:0007390; P:GO:0007394; P:GO:0007435; P:GO:0008258; P:GO:0030032; P:GO:0031532; P:GO:0035099; P:GO:0042067; P:GO:0051017; P:GO:0090303	P:establishment of imaginal disc-derived wing hair orientation; F:GTPase activity; F:GTP binding; C:intracellular; P:JNK cascade; P:small GTPase mediated signal transduction; P:germ-band shortening; P:dorsal closure, elongation of leading edge cells; P:salivary gland morphogenesis; P:head involution; P:lamellipodium assembly; P:actin cytoskeleton reorganization; P:hemocyte migration; P:establishm…	EC:3.6.1.15	Nucleoside-triphosphate phosphatase				NP_733223.1 Mig-2-like, isoform C [Drosophila melanogaster]		3757	483	615	215	97	52	77	665	529	514	253	220	402	26		660.59	117.522	26.9857	80.9741	38.4365	12.945	19.3221	109.904	98.931	78.7329	51.1643	45.3631	46.1828	12.7087
SBULL_14341.mrna1	110	serine/threonine-protein kinase unc-51 isoform X1	3	F:GO:0004674; F:GO:0005524; P:GO:0006468	F:protein serine/threonine kinase activity; F:ATP binding; P:protein phosphorylation	EC:2.7.11	Transferring phosphorus-containing groups				NP_648601.1 Autophagy-related 1, isoform A [Drosophila melanogaster]		3	36	338	3	12	7	4	91	57	68	57	82	97	8		1.80149	29.2021	30.0899	3.80952	10.249	4.91619	3.25215	47.7755	33.8628	33.0882	36.6179	53.7113	35.3995	10.1004
SBULL_14345.mrna1	172	zinc transporter 2 isoform X1	3	F:GO:0008324; C:GO:0016021; P:GO:0098655	F:cation transmembrane transporter activity; C:integral component of membrane; P:cation transmembrane transport						NP_724431.1 zinc transporter 41F, isoform D [Drosophila melanogaster]		26	17	102	40	38	24	64	76	95	66	83	80	117	19		6.56218	6.33274	5.26557	21.509	21.1208	7.78129	21.768	16.3059	23.0642	13.1243	21.7903	21.4145	17.4493	11.6821
SBULL_14352.mrna1	298	protein BCCIP homolog	2	F:GO:0019887; P:GO:0045859	F:protein kinase regulator activity; P:regulation of protein kinase activity						NP_650317.3 uncharacterized protein Dmel_CG9286 [Drosophila melanogaster]		95	144	885	100	249	208	168	290	224	438	322	343	471	345		10.8961	25.5783	20.8124	23.5216	63.344	30.8552	25.8107	28.1283	24.5854	39.3749	38.2169	41.5075	31.7562	103.554
SBULL_14355.mrna1	507	putative aminopeptidase W07G4.4	6	C:GO:0005737; P:GO:0006508; F:GO:0008235; F:GO:0008239; F:GO:0008240; F:GO:0030145	C:cytoplasm; P:proteolysis; F:metalloexopeptidase activity; F:dipeptidyl-peptidase activity; F:tripeptidyl-peptidase activity; F:manganese ion binding	EC:3.4.11; EC:3.4.14	Acting on peptide bonds (peptidases); Acting on peptide bonds (peptidases)				NP_731864.1 dipeptidase B, isoform C [Drosophila melanogaster]		3799	770	80369	1105	2641	1766	746	7577	7662	8965	5862	7282	11474	832		222.246	66.0982	1113.59	130.659	355.296	134.667	60.0666	385.008	440.554	422.205	364.479	461.648	405.274	134.895
SBULL_14356.mrna1	42	---NA---											3	0	438	3	5	2	0	157	238	182	92	120	287	2		1.47702	0	49.912	0	3.12704	0	0	102.573	175.953	110.207	73.5492	97.8147	130.34	2.971
SBULL_1437.mrna1	85	endothelial lipase	1	F:GO:0016787	F:hydrolase activity						NP_647821.2 uncharacterized protein Dmel_CG10357 [Drosophila melanogaster]		0	0	20	0	2	0	0	0	0	0	0	0	1	0		0	0	2.33329	0	0	0	0	0	0	0	0	0	0.745569	0
SBULL_14409.mrna1	233	FAM206 family protein CG9288									NP_650316.1 uncharacterized protein Dmel_CG9288 [Drosophila melanogaster]		176	45	1211	140	233	176	68	342	241	386	289	228	446	212		24.4945	11.438	43.0131	36.7108	86.0597	36.0683	15.0057	46.2428	36.874	48.3734	47.8157	38.4628	41.9194	86.4651
SBULL_14412.mrna1	70	uncharacterized protein LOC111682681									NP_572739.1 uncharacterized protein Dmel_CG2444, isoform A [Drosophila melanogaster]		0	9	1	1	8	2	0	322	463	647	517	436	1586	4		0	34.407	0	0	45.2935	10.6336	0	651.111	1059.41	1212.56	1279.22	1099.95	2229.28	14.0599
SBULL_14414.mrna1	327	dehydrogenase/reductase SDR family protein 7-like	4	C:GO:0005778; C:GO:0016021; F:GO:0016491; P:GO:0055114	C:peroxisomal membrane; C:integral component of membrane; F:oxidoreductase activity; P:oxidation-reduction process						NP_651717.1 uncharacterized protein Dmel_CG7601 [Drosophila melanogaster]		54	15	1520	45	108	40	69	87	65	107	69	74	120	58		7.41456	3.60447	46.8687	11.4527	29.1867	6.13622	11.6231	16.0205	12.573	17.7222	18.0225	16.549	15.4471	22.0187
SBULL_14426.mrna1	778	WD repeat-containing protein 24	6	P:GO:0007042; P:GO:0016239; P:GO:0030307; C:GO:0044754; C:GO:0061700; P:GO:1904263	P:lysosomal lumen acidification; P:positive regulation of macroautophagy; P:positive regulation of cell growth; C:autolysosome; C:GATOR2 complex; P:positive regulation of TORC1 signaling						NP_651720.3 WD repeat domain 24, isoform B [Drosophila melanogaster]		213	34	710	51	49	57	71	375	305	296	401	371	591	70		8.5987	2.05918	6.29842	4.13276	4.35743	3.02153	3.70535	11.7813	10.843	8.61898	15.4157	14.542	12.9066	7.12233
SBULL_1443.mrna1	162	---NA---											0	0	2	0	1	0	2	12	1	4	1	0	10	0		0	0	0.125674	0	0.626893	0	0.761696	2.84862	0.26862	0.880065	0.290475	0	1.65012	0
SBULL_14436.mrna1	598	integrator complex subunit 11	1	P:GO:0034472	P:snRNA 3'-end processing						NP_651721.1 integrator 11 [Drosophila melanogaster]		168	246	1539	168	279	259	295	525	467	628	593	641	971	346		8.9512	19.9069	18.027	18.0984	33.1143	18.5313	20.5868	22.3485	22.6697	24.7311	31.1576	34.184	28.7002	46.672
SBULL_14442.mrna1	55	---NA---											1	1	23	0	4	5	0	13	17	20	7	22	34	0		0	0	14.6932	0	0	0	0	120.738	125.694	134.284	88.6438	192.815	154.427	0
SBULL_14449.mrna1	311	complex I intermediate-associated protein 30, mitochondrial	8	P:GO:0001666; C:GO:0005747; P:GO:0006120; P:GO:0009408; P:GO:0032981; P:GO:0042594; F:GO:0051082; P:GO:0055093	P:response to hypoxia; C:mitochondrial respiratory chain complex I; P:mitochondrial electron transport, NADH to ubiquinone; P:response to heat; P:mitochondrial respiratory chain complex I assembly; P:response to starvation; F:unfolded protein binding; P:response to hyperoxia						NP_651718.1 complex I intermediate-associated protein, 30 kDa [Drosophila melanogaster]		21	27	538	118	85	139	78	98	63	166	72	44	88	204		3.71329	7.84751	19.3509	34.0082	35.8839	30.6381	17.2064	15.6067	11.5311	23.8244	14.2666	8.7049	8.80651	82.3935
SBULL_14454.mrna1	343	probable cardiolipin synthase (CMP-forming)	6	C:GO:0005739; P:GO:0006754; P:GO:0007006; P:GO:0008654; F:GO:0008808; C:GO:0016021	C:mitochondrion; P:ATP biosynthetic process; P:mitochondrial membrane organization; P:phospholipid biosynthetic process; F:cardiolipin synthase activity; C:integral component of membrane						NP_733117.1 cardiolipin synthase, isoform C [Drosophila melanogaster]		302	218	1233	146	156	201	171	274	270	400	186	126	245	173		41.4414	44.803	35.9311	34.668	41.7547	35.8162	31.1313	33.827	34.1472	46.2385	24.8155	18.7235	20.5818	61.6647
SBULL_1446.mrna1	250	---NA---											1	1	3	0	1	0	0	0	0	1	0	0	0	0		0.153664	0.231129	0.0674621	0	0.336277	0	0	0	0	0.113611	0	0	0	0
SBULL_14462.mrna1	493	N-terminal kinase-like protein isoform X1	3	F:GO:0004672; F:GO:0005524; P:GO:0006468	F:protein kinase activity; F:ATP binding; P:protein phosphorylation						NP_651722.1 yata, isoform A [Drosophila melanogaster]		1078	150	2282	139	140	125	196	352	230	284	230	250	420	67		72.2856	15.0991	33.3482	18.755	20.6475	11.2138	17.0272	18.5278	13.6603	13.9615	14.7717	16.502	15.3236	11.0537
SBULL_14464.mrna1	183	N-terminal kinase-like protein isoform X1	3	F:GO:0004672; F:GO:0005524; P:GO:0006468	F:protein kinase activity; F:ATP binding; P:protein phosphorylation						NP_651722.1 yata, isoform A [Drosophila melanogaster]		223	36	863	21	30	33	41	124	79	128	67	71	129	18		42.0028	11.1495	39.5055	8.7808	12.9928	8.67499	9.40605	24.0587	17.7836	23.5571	16.6189	17.1869	17.3981	10.1396
SBULL_14475.mrna1	250	probable glucosamine 6-phosphate N-acetyltransferase isoform X1	3	F:GO:0004343; P:GO:0006048; C:GO:0016021	F:glucosamine 6-phosphate N-acetyltransferase activity; P:UDP-N-acetylglucosamine biosynthetic process; C:integral component of membrane	EC:2.3.1.4	Glucosamine-phosphate N-acetyltransferase				NP_651719.1 uncharacterized protein Dmel_CG1969, isoform A [Drosophila melanogaster]		53	349	2649	266	207	172	136	1945	4291	1133	4036	3595	3583	251		5.0709	50.8484	81.2918	61.7075	60.8661	23.098	15.6376	238.419	595.202	128.722	605.378	549.804	305.302	93.5888
SBULL_14479.mrna1	766	progestin and adipoQ receptor family member 4 isoform X2	1	C:GO:0016021	C:integral component of membrane						NP_001163764.1 uncharacterized protein Dmel_CG33203, isoform D [Drosophila melanogaster]		2	0	46	239	88	86	136	3	2	3	0	0	4	13		0.082115	0	0.417355	20.0282	7.95864	4.77428	7.16586	0.0958711	0.0723238	0.0888564	0	0	0.0888564	1.34494
SBULL_1448.mrna1	387	glycine-rich cell wall structural protein 1.8-like	2	C:GO:0016020; C:GO:0016021	C:membrane; C:integral component of membrane								2	0	19046	1	0	1	0	3	6	3	0	0	2	1		0.177833	0	353.048	0.179273	0	0.119052	0	0.209789	0.474785	0.194439	0	0	0.0972194	0.220449
SBULL_14481.mrna1	81	---NA---											0	0	1	10	17	11	27	0	0	0	1	0	0	3		0	0	0.267188	13.9523	42.8846	23.4248	35.3659	0	0	0	1.52575	0	0	7.20016
SBULL_145.mrna1	454	---NA---											1	0	8	0	1	0	0	3	8	12	3	0	3	1		0.0737243	0	0.113821	0	0.162087	0	0	0.173371	0.523154	0.642743	0.212144	0	0.120514	0.183722
SBULL_14501.mrna1	1289	serine/threonine-protein kinase Doa isoform X1	3	F:GO:0004672; F:GO:0005524; P:GO:0006468	F:protein kinase activity; F:ATP binding; P:protein phosphorylation						NP_001036763.2 darkener of apricot, isoform Y [Drosophila melanogaster]		97	106	489	148	109	631	2014	126	164	157	95	40	130	120		2.26167	3.74506	2.52759	6.70503	5.50642	19.3846	60.4952	2.30179	3.39019	2.65825	2.12361	0.911682	1.65083	7.16655
SBULL_14515.mrna1	584	darkener of apricot, isoform X	4	F:GO:0004672; F:GO:0005524; P:GO:0006468; F:GO:0016740	F:protein kinase activity; F:ATP binding; P:protein phosphorylation; F:transferase activity						NP_001247353.1 darkener of apricot, isoform X [Drosophila melanogaster]		78	107	100	549	220	1479	1559	63	99	94	42	12	22	17		3.98655	8.89117	1.21028	57.7617	24.9816	106.771	110.078	2.72346	4.84285	3.76626	2.2217	0.647217	0.661098	2.36028
SBULL_14522.mrna1	44	---NA---											0	1	2	0	0	1	0	1	2	0	4	0	1	0		0	0	0	0	0	0	0	11.5097	26.0482	0	56.3348	0	8.00063	0
SBULL_14528.mrna1	863	probable serine/threonine-protein kinase dyrk2 isoform X4	5	F:GO:0004672; F:GO:0005524; P:GO:0006468; F:GO:0016301; P:GO:0016310	F:protein kinase activity; F:ATP binding; P:protein phosphorylation; F:kinase activity; P:phosphorylation						NP_001014678.1 darkener of apricot, isoform L [Drosophila melanogaster]		474	188	1060	258	129	362	476	886	1388	855	331	292	562	71		17.0328	10.0146	8.35965	18.6091	10.098	17.3605	22.1982	24.8591	44.0683	22.2341	11.3641	10.2217	10.961	6.46707
SBULL_1454.mrna1	23	---NA---											17	2	137	12	11	4	9	21	22	29	23	18	26	9		1.56285	0.276166	2.75455	2.22485	2.22096	0.492415	1.07408	1.51933	1.80111	1.94461	2.03618	1.62478	1.30758	2.04926
SBULL_14541.mrna1	100	darkener of apricot, isoform L	3	F:GO:0004672; F:GO:0005524; P:GO:0006468	F:protein kinase activity; F:ATP binding; P:protein phosphorylation						NP_001014678.1 darkener of apricot, isoform L [Drosophila melanogaster]		62	33	105	24	10	9	30	112	137	88	47	58	83	1		44.7138	34.6788	12.7632	32.5387	12.8222	8.32158	29.1178	75.1505	104.021	54.7265	38.5892	48.5545	38.7128	1.51502
SBULL_14544.mrna1	201	serine/threonine-protein kinase Doa isoform X6	5	F:GO:0004672; F:GO:0005524; P:GO:0006468; F:GO:0016301; P:GO:0016310	F:protein kinase activity; F:ATP binding; P:protein phosphorylation; F:kinase activity; P:phosphorylation						NP_001138121.1 darkener of apricot, isoform U [Drosophila melanogaster]		63	160	143	40	11	41	73	63	56	65	44	70	86	8		13.09	50.0658	6.50121	16.9403	4.53283	11.456	19.8768	10.5686	10.6304	10.1063	9.03199	14.6508	10.0285	3.96281
SBULL_14545.mrna1	1678	serine-rich adhesin for platelets isoform X1	2	F:GO:0003677; C:GO:0005634	F:DNA binding; C:nucleus						NP_001262888.1 six-banded, isoform H [Drosophila melanogaster]		272	3602	1419	199	283	244	405	510	764	804	346	291	564	53		4.74043	93.6402	5.56559	6.77277	10.5744	5.49451	9.18727	7.06565	11.9773	10.3238	5.86561	5.02994	5.43155	2.40806
SBULL_14568.mrna1	125	cytochrome P450 CYP12A2-like	7	F:GO:0004497; F:GO:0005506; F:GO:0016491; F:GO:0016705; F:GO:0020037; F:GO:0046872; P:GO:0055114	F:monooxygenase activity; F:iron ion binding; F:oxidoreductase activity; F:oxidoreductase activity, acting on paired donors, with incorporation or reduction of molecular oxygen; F:heme binding; F:metal ion binding; P:oxidation-reduction process						NP_650782.1 Cyp12a5 [Drosophila melanogaster]		1	4	29	27	12	7	14	2	0	1	0	0	0	2		0.457863	1.38702	3.04327	21.0152	6.89287	4.97147	6.12537	0.78187	0	1.44932	0	0	0	3.02301
SBULL_14569.mrna1	75	cytochrome P450 CYP12A2-like	5	F:GO:0004497; F:GO:0005506; F:GO:0016705; F:GO:0020037; P:GO:0055114	F:monooxygenase activity; F:iron ion binding; F:oxidoreductase activity, acting on paired donors, with incorporation or reduction of molecular oxygen; F:heme binding; P:oxidation-reduction process						NP_650782.1 Cyp12a5 [Drosophila melanogaster]		3	2	39	14	15	6	3	0	0	1	0	0	0	0		0	0	7.09649	0	8.59746	3.1787	3.4243	0	0	4.45221	0	0	1.11305	0
SBULL_14571.mrna1	693	peptidase, M23 family	1	C:GO:0016020	C:membrane								0	0	0	0	0	0	0	0	0	0	0	0	0	0		0	0	0	0	0	0	0	0	0	0	0	0	0	0
SBULL_14574.mrna1	176	adenylate kinase isoenzyme 6 homolog	7	F:GO:0004017; F:GO:0005524; C:GO:0005634; C:GO:0005737; P:GO:0016310; F:GO:0016887; P:GO:0046940	F:adenylate kinase activity; F:ATP binding; C:nucleus; C:cytoplasm; P:phosphorylation; F:ATPase activity; P:nucleoside monophosphate phosphorylation	EC:2.7.4.4; EC:2.7.4.3; EC:3.6.1.3; EC:3.6.1.15	Nucleoside-phosphate kinase; Adenylate kinase; Adenosinetriphosphatase; Nucleoside-triphosphate phosphatase				NP_610797.1 adenylate kinase 6 [Drosophila melanogaster]		39	67	113	24	44	64	55	33	39	49	16	46	67	54		13.6776	33.2205	8.84195	17.1085	42.9874	26.6124	20.6561	12.6027	18.2353	21.8293	12.8931	24.7453	20.2496	58.9102
SBULL_14576.mrna1	405	Histone-lysine N-methyltransferase eggless	9	F:GO:0003677; C:GO:0005634; C:GO:0005694; F:GO:0008270; P:GO:0010468; F:GO:0018024; P:GO:0022414; P:GO:0034968; P:GO:0050794	F:DNA binding; C:nucleus; C:chromosome; F:zinc ion binding; P:regulation of gene expression; F:histone-lysine N-methyltransferase activity; P:reproductive process; P:histone lysine methylation; P:regulation of cellular process	EC:2.1.1.43	Histone-lysine N-methyltransferase				NP_611966.3 eggless [Drosophila melanogaster]		200	126	971	20	36	28	76	167	134	124	238	232	268	22		16.6819	15.6891	17.1591	3.22613	6.10896	3.15806	8.30715	11.0544	10.0371	7.60749	19.2775	19.16	12.3315	4.60269
SBULL_14577.mrna1	402	histone-lysine N-methyltransferase eggless-like	9	F:GO:0003677; C:GO:0005634; C:GO:0005694; F:GO:0008168; F:GO:0008270; F:GO:0016740; F:GO:0018024; P:GO:0032259; P:GO:0034968	F:DNA binding; C:nucleus; C:chromosome; F:methyltransferase activity; F:zinc ion binding; F:transferase activity; F:histone-lysine N-methyltransferase activity; P:methylation; P:histone lysine methylation								222	136	1240	19	40	46	103	193	161	154	273	260	356	19		16.4041	14.8066	21.712	2.9122	6.72281	4.55142	10.4762	12.8902	12.1678	9.53288	22.311	21.6653	16.5278	4.0091
SBULL_14578.mrna1	275	Histone-lysine N-methyltransferase eggless	11	F:GO:0003677; C:GO:0005634; C:GO:0005700; C:GO:0005737; F:GO:0008270; C:GO:0010369; F:GO:0046974; P:GO:0048132; P:GO:0051038; P:GO:0051567; P:GO:0090309	F:DNA binding; C:nucleus; C:polytene chromosome; C:cytoplasm; F:zinc ion binding; C:chromocenter; F:histone methyltransferase activity (H3-K9 specific); P:female germ-line stem cell asymmetric division; P:negative regulation of transcription involved in meiotic cell cycle; P:histone H3-K9 methylation; P:positive regulation of methylation-dependent chromatin silencing	EC:2.1.1.43	Histone-lysine N-methyltransferase				NP_611966.3 eggless [Drosophila melanogaster]		96	55	752	8	12	14	27	142	134	112	158	162	246	33		12.3432	10.8086	20.5664	1.64787	2.67429	2.54691	4.4177	15.3038	16.3418	11.1874	20.8364	21.7828	18.4293	10.926
SBULL_14582.mrna1	83	Histone-lysine N-methyltransferase eggless	13	F:GO:0003677; F:GO:0005515; C:GO:0005634; C:GO:0005700; C:GO:0005737; P:GO:0007275; F:GO:0008270; C:GO:0010369; F:GO:0046974; P:GO:0048132; P:GO:0051038; P:GO:0051567; P:GO:0090309	F:DNA binding; F:protein binding; C:nucleus; C:polytene chromosome; C:cytoplasm; P:multicellular organism development; F:zinc ion binding; C:chromocenter; F:histone methyltransferase activity (H3-K9 specific); P:female germ-line stem cell asymmetric division; P:negative regulation of transcription involved in meiotic cell cycle; P:histone H3-K9 methylation; P:positive regulation of methylation-de…	EC:2.1.1.43	Histone-lysine N-methyltransferase				NP_611966.3 eggless [Drosophila melanogaster]		65	44	230	9	6	17	22	40	33	33	57	72	61	9		87.3939	84.5619	47.6026	24.9087	13.9763	30.6927	41.5067	46.1878	43.1187	35.3169	80.5372	103.726	48.962	20.3815
SBULL_14594.mrna1	185	probable cytochrome P450 301a1, mitochondrial	5	F:GO:0005506; P:GO:0007490; F:GO:0016705; F:GO:0020037; P:GO:0055114	F:iron ion binding; P:tergite morphogenesis; F:oxidoreductase activity, acting on paired donors, with incorporation or reduction of molecular oxygen; F:heme binding; P:oxidation-reduction process						NP_610796.1 Cyp301a1 [Drosophila melanogaster]		8	8	579	57	31	26	6	160	287	144	70	72	101	77		0.700535	1.75936	26.0672	22.4232	11.1907	6.60064	1.22661	30.3397	61.5826	25.3078	16.2422	17.0338	13.313	42.5111
SBULL_14595.mrna1	147	probable cytochrome P450 301a1, mitochondrial	5	F:GO:0005506; P:GO:0007490; F:GO:0016705; F:GO:0020037; P:GO:0055114	F:iron ion binding; P:tergite morphogenesis; F:oxidoreductase activity, acting on paired donors, with incorporation or reduction of molecular oxygen; F:heme binding; P:oxidation-reduction process						NP_610796.1 Cyp301a1 [Drosophila melanogaster]		9	4	475	38	18	23	9	137	255	108	58	76	89	47		1.69781	2.05168	30.1125	16.8147	10.2927	6.88279	3.59862	38.6999	81.5107	28.2758	20.0481	26.785	17.476	35.6979
SBULL_14599.mrna1	75	protein outspread isoform X1									NP_723879.3 outspread, isoform D [Drosophila melanogaster]		11	16	73	6	12	8	8	52	92	57	20	17	24	3		24.0933	45.0268	16.8964	32.6041	38.6886	22.2509	27.3944	83.2639	166.696	84.592	39.1866	33.9618	26.7133	8.73638
SBULL_14600.mrna1	59	---NA---											0	9	21	0	1	0	0	58	67	57	16	2	10	0		0	0	14.5813	0	0	0	0	215.718	281.98	196.487	72.817	9.2806	25.8536	0
SBULL_14603.mrna1	41	---NA---											4	5	32	1	4	4	1	36	37	24	3	4	8	2		702.616	0	92.8461	1522.78	2943.93	670.095	1486.42	552.637	642.724	341.468	75.1368	76.61	85.367	37.6697
SBULL_14605.mrna1	174	G-protein coupled receptor Mth2	5	F:GO:0004930; P:GO:0006950; P:GO:0007166; P:GO:0007186; C:GO:0016021	F:G-protein coupled receptor activity; P:response to stress; P:cell surface receptor signaling pathway; P:G-protein coupled receptor signaling pathway; C:integral component of membrane						NP_723538.3 methuselah-like 15, isoform C [Drosophila melanogaster]		0	4	27	4	8	7	2	4	2	4	1	6	8	5		0	1.55478	1.29332	2.11163	4.48643	2.43129	0.678463	0.842006	0.476398	0.780398	0.257579	1.57577	1.1706	3.02394
SBULL_14608.mrna1	199	G protein alpha q subunit isoform X2	4	F:GO:0003924; F:GO:0005525; P:GO:0007186; F:GO:0031683	F:GTPase activity; F:GTP binding; P:G-protein coupled receptor signaling pathway; F:G-protein beta/gamma-subunit complex binding	EC:3.6.1.15	Nucleoside-triphosphate phosphatase				NP_725197.2 G protein alpha q subunit, isoform K [Drosophila melanogaster]		0	2	4	1	0	0	0	68	57	62	58	45	96	2		0	0.634993	0.73788	0.429803	0	0.567041	0	18.0536	17.3455	15.312	20.2155	17.212	17.5219	4.51874
SBULL_14614.mrna1	285	uncharacterized protein LOC111675679									NP_609681.1 uncharacterized protein Dmel_CG8997, isoform A [Drosophila melanogaster]		0	3	55	107	959	116	111	7	1	26	2	36	33	149		0	0.584307	1.53796	28.0545	266.607	20.1527	18.2202	0.71964	0.116333	2.47737	0.251595	4.61751	2.35827	44.0479
SBULL_14619.mrna1	586	DNA-binding protein modulo	3	F:GO:0003677; F:GO:0003723; C:GO:0005634	F:DNA binding; F:RNA binding; C:nucleus						NP_524614.2 modulo, isoform A [Drosophila melanogaster]		787	3172	11812	159	1197	503	380	1776	1526	2238	2484	2204	3253	2182		43.1331	261.908	140.857	17.4062	142.885	37.1015	27.1284	76.4793	74.3602	89.3227	130.89	118.413	97.3749	301.538
SBULL_14628.mrna1	490	RNA-binding protein 34	1	F:GO:0003723	F:RNA binding						NP_609822.1 uncharacterized protein Dmel_CG12288 [Drosophila melanogaster]		43	945	1297	28	174	131	114	102	89	178	155	129	194	452		3.44378	107.652	25.9976	3.9405	34.3062	13.7317	10.6732	8.51043	7.5367	14.5997	16.7525	14.1133	11.7949	105.392
SBULL_1463.mrna1	249	proteasome subunit alpha type-7-1	5	F:GO:0004298; C:GO:0005634; C:GO:0005737; P:GO:0006511; C:GO:0019773	F:threonine-type endopeptidase activity; C:nucleus; C:cytoplasm; P:ubiquitin-dependent protein catabolic process; C:proteasome core complex, alpha-subunit complex	EC:3.4.25	Acting on peptide bonds (peptidases)				NP_525092.1 proteasome alpha4 subunit [Drosophila melanogaster]		413	438	3925	423	1042	417	213	1539	1471	2150	2214	2054	3063	500		56.5414	95.0387	116.48	121.89	306.957	79.6187	40.515	189.694	205.169	245.614	333.923	315.866	262.436	187.377
SBULL_14630.mrna1	182	cysteine-rich DPF motif domain-containing protein 1									NP_649815.1 uncharacterized protein Dmel_CG11755, isoform A [Drosophila melanogaster]		0	0	0	0	0	0	0	0	0	0	0	0	0	0		3.85022	2.90136	3.62562	2.95184	4.19182	6.80387	8.5373	2.93586	3.10068	3.62807	4.55043	4.39547	3.26526	1.70291
SBULL_14636.mrna1	553	set1/Ash2 histone methyltransferase complex subunit ASH2 isoform X1	4	F:GO:0008168; F:GO:0046872; C:GO:0048188; P:GO:0051568	F:methyltransferase activity; F:metal ion binding; C:Set1C/COMPASS complex; P:histone H3-K4 methylation						NP_788735.1 absent, small, or homeotic discs 2, isoform C [Drosophila melanogaster]		292	133	2637	113	275	142	179	523	447	543	757	643	1113	60		16.8938	11.7501	33.9143	13.3743	35.1018	10.7069	13.6416	24.0543	23.264	23.1469	42.6032	36.8969	35.5835	8.84571
SBULL_14637.mrna1	425	probable serine/threonine-protein kinase mps1	3	F:GO:0003674; C:GO:0005575; P:GO:0008150	F:molecular_function; C:cellular_component; P:biological_process						NP_733025.1 uncharacterized protein Dmel_CG31125 [Drosophila melanogaster]		19	42	638	2	49	3	6	38	18	27	75	91	91	7		1.51262	5.02085	10.9001	0.320754	8.04869	0.319674	0.619475	2.37444	1.27273	1.56366	5.73447	7.09425	3.95258	1.386
SBULL_14645.mrna1	993	CLK4-associating serine/arginine rich protein									NP_996288.1 uncharacterized protein Dmel_CG6695, isoform B [Drosophila melanogaster]		613	441	4706	132	296	465	624	1452	1404	2167	1834	1868	2798	778		15.6172	18.0226	31.7033	6.72527	16.9709	14.3118	19.6127	35.0139	38.3112	48.4322	54.1163	56.2003	46.9012	60.9976
[truncated: 14,863 more rows]
